# Supplementary material for: Metagenomic analysis reveals the diversity of the vaginal virome and its association with vaginitis
Source: Front Cell Infect Microbiol. 2025 Apr 3;15:1582553. doi: 10.3389/fcimb.2025.1582553 (PMC12003417; doi:10.3389/fcimb.2025.1582553)
Supplement: Supplementary file 2 [file Table1.xlsx]

## Sheet: Supplementary Table 1
Supplementary Table 1. Detailed information of 24 libraries constructed in this study.
Library name	Group	Sample numbers	Sampling location	Sampling date	Sample type	Total reads	Virus reads	SRA no.
HC_16	Healthy	11	China: Yancheng	2024-01-01	vaginal swabs	8213134	113506	SRR30907810
HC_18	Healthy	12	China: Yancheng	2024-01-02	vaginal swabs	18200252	266014	SRR30907809
HC_19	Healthy	11	China: Yancheng	2024-01-03	vaginal swabs	19017792	251994	SRR30907798
HC_21	Healthy	12	China: Yancheng	2024-01-04	vaginal swabs	18483142	162556	SRR30907793
HC_24	Healthy	11	China: Yancheng	2024-01-05	vaginal swabs	13478128	227448	SRR30907792
HC_02	Healthy	12	China: Yancheng	2024-01-06	vaginal swabs	35403852	435844	SRR30907791
HC_03	Healthy	11	China: Yancheng	2024-01-07	vaginal swabs	7581692	87906	SRR30907790
HC_04	Healthy	10	China: Yancheng	2024-01-08	vaginal swabs	6133496	86429	SRR30907789
HC_05	Healthy	10	China: Yancheng	2024-01-09	vaginal swabs	11986058	205057	SRR30907788
HC_07	Healthy	10	China: Yancheng	2024-01-10	vaginal swabs	17717096	264961	SRR30907787
HC_10	Healthy	10	China: Yancheng	2024-01-11	vaginal swabs	29582702	306397	SRR30907808
HC_11	Healthy	10	China: Yancheng	2024-01-12	vaginal swabs	27875394	179817	SRR30907807
VA_01	Vaginitis	12	China: Yancheng	2024-01-13	vaginal swabs	19471468	362306	SRR30907806
VA_06	Vaginitis	10	China: Yancheng	2024-01-14	vaginal swabs	11624830	606542	SRR30907805
VA_08	Vaginitis	10	China: Yancheng	2024-01-15	vaginal swabs	33600394	749829	SRR30907804
VA_09	Vaginitis	10	China: Yancheng	2024-01-16	vaginal swabs	33170456	248424	SRR30907803
VA_12	Vaginitis	11	China: Yancheng	2024-01-17	vaginal swabs	16920276	265155	SRR30907802
VA_13	Vaginitis	12	China: Yancheng	2024-01-18	vaginal swabs	22568630	528887	SRR30907801
VA_14	Vaginitis	12	China: Yancheng	2024-01-19	vaginal swabs	35890488	156186	SRR30907800
VA_15	Vaginitis	12	China: Yancheng	2024-01-20	vaginal swabs	16489706	562584	SRR30907799
VA_17	Vaginitis	12	China: Yancheng	2024-01-21	vaginal swabs	23575958	3007940	SRR30907797
VA_20	Vaginitis	12	China: Yancheng	2024-01-22	vaginal swabs	35251376	2864829	SRR30907796
VA_22	Vaginitis	12	China: Yancheng	2024-01-23	vaginal swabs	36608454	113717	SRR30907795
VA_23	Vaginitis	12	China: Yancheng	2024-01-24	vaginal swabs	35637174	70059	SRR30907794

## Sheet: Supplementary Table 2
Supplementary Table 2. Information of viruses identified in the human vagina.
Accession No.	Length (bp)	Genome coverage	Isolate	Taxonomy
PQ580906	2672	1	DZY01_k141_4470	Gammatorquevirus homidi14
PQ580907	2914	1	DZY01_k141_4921	Betatorquevirus homini36
PQ580908	3150	1	DZY01_k141_10625	Alphatorquevirus homin18
PQ580909	2431	1	DZY01_k141_15684	Gammatorquevirus
PQ580910	2414	1	DZY02_k141_4435	Alphatorquevirus homin3
PQ580911	2733	1	DZY02_k141_5426	Alphatorquevirus homin20
PQ580912	3410	1	DZY02_k141_6057	Alphatorquevirus homin1
PQ580913	2954	1	DZY02_k141_6796	Alphatorquevirus homin19
PQ580914	2747	1	DZY02_k141_8216	Alphatorquevirus
PQ580915	2393	1	DZY02_k141_8485	Alphatorquevirus homin18
PQ580916	3648	1	DZY02_k141_10561	Alphatorquevirus homin24
PQ580917	2744	1	DZY02_k141_11164	Gammatorquevirus homidi2
PQ580918	3054	1	DZY02_k141_11769	Alphatorquevirus
PQ580919	2986	1	DZY07_k141_1520	Alphatorquevirus homin9
PQ580920	2090	1	DZY07_k141_1589	Alphatorquevirus homin10
PQ580921	3222	1	DZY07_k141_4145	Alphatorquevirus homin17
PQ580922	2293	1	DZY07_k141_4164	Alphatorquevirus homin18
PQ580923	3218	1	DZY07_k141_4196	Alphatorquevirus homin24
PQ580924	3211	1	DZY07_k141_4271	Alphatorquevirus homin24
PQ580925	2407	1	DZY07_k141_4461	Alphatorquevirus homin13
PQ580926	2482	1	DZY07_k141_5180	Alphatorquevirus homin10
PQ580927	2823	1	DZY07_k141_5468	Betatorquevirus
PQ580928	2663	1	DZY07_k141_14073	Alphatorquevirus homin1
PQ580929	2768	1	DZY07_k141_14707	Betatorquevirus homini38
PQ580930	2467	1	DZY07_k141_15230	Betatorquevirus homini38
PQ580931	3096	1	DZY07_k141_16627	Alphatorquevirus homin31
PQ580932	3211	1	DZY07_k141_17340	Alphatorquevirus homin24
PQ580933	2889	1	DZY07_k141_18843	Alphatorquevirus homin5
PQ580934	2864	1	DZY08_k141_9787	Betatorquevirus homini10
PQ580935	2901	1	DZY08_k141_19439	Alphatorquevirus homin21
PQ580936	2573	1	DZY09_k141_2223	Alphatorquevirus homin19
PQ580937	2150	1	DZY09_k141_4385	Betatorquevirus homini10
PQ580938	2417	1	DZY09_k141_8590	Gammatorquevirus homidi1
PQ580939	2234	1	DZY10_k141_1604	Gammatorquevirus
PQ580940	3116	1	DZY10_k141_2468	Alphatorquevirus homin1
PQ580941	2434	1	DZY10_k141_3612	Betatorquevirus
PQ580942	3472	1	DZY10_k141_3970	Alphatorquevirus homin1
PQ580943	2362	1	DZY10_k141_4417	Alphatorquevirus homin5
PQ580944	2581	1	DZY10_k141_4598	Gammatorquevirus homidi11
PQ580945	2648	1	DZY10_k141_5955	Gammatorquevirus homidi2
PQ580946	3044	1	DZY10_k141_5992	Alphatorquevirus
PQ580947	2509	1	DZY10_k141_6152	Gammatorquevirus
PQ580948	2790	1	DZY10_k141_9450	Alphatorquevirus homin3
PQ580949	2651	1	DZY10_k141_9938	Gammatorquevirus homidi14
PQ580950	2277	1	DZY10_k141_12868	Gammatorquevirus homidi11
PQ580951	2586	1	DZY10_k141_13985	Gammatorquevirus homidi11
PQ580952	2490	1	DZY10_k141_20416	Gammatorquevirus homidi11
PQ580953	3737	1	DZY10_k141_21999	Alphatorquevirus
PQ580954	2871	1	DZY10_k141_22400	Alphatorquevirus homin31
PQ580955	2752	1	DZY12_k141_1341	Alphatorquevirus homin10
PQ580956	2832	1	DZY12_k141_1971	Alphatorquevirus homin24
PQ580957	2586	1	DZY12_k141_2200	Betatorquevirus homini1
PQ580958	2454	1	DZY12_k141_2278	Alphatorquevirus homin1
PQ580959	3213	1	DZY12_k141_2637	Alphatorquevirus homin13
PQ580960	2669	1	DZY12_k141_3252	Alphatorquevirus homin31
PQ580961	3156	1	DZY12_k141_3437	Alphatorquevirus homin21
PQ580962	3040	1	DZY12_k141_3474	Alphatorquevirus homin10
PQ580963	3111	1	DZY12_k141_4216	Alphatorquevirus homin24
PQ580964	2705	1	DZY12_k141_6424	Betatorquevirus homini36
PQ580965	3107	1	DZY12_k141_6607	Alphatorquevirus homin3
PQ580966	2757	1	DZY12_k141_6964	Betatorquevirus homini31
PQ580967	2353	1	DZY12_k141_7182	Alphatorquevirus homin3
PQ580968	2813	1	DZY12_k141_7370	Betatorquevirus homini38
PQ580969	2874	1	DZY12_k141_8727	Betatorquevirus homini20
PQ580970	2739	1	DZY12_k141_10145	Betatorquevirus homini20
PQ580971	2755	1	DZY12_k141_11473	Alphatorquevirus homin5
PQ580972	2587	1	DZY13_k141_585	Gammatorquevirus homidi8
PQ580973	2470	1	DZY13_k141_1019	Gammatorquevirus
PQ580974	2685	1	DZY13_k141_2697	Betatorquevirus homini36
PQ580975	2445	1	DZY13_k141_2764	Alphatorquevirus homin24
PQ580976	2626	1	DZY13_k141_2802	Betatorquevirus homini36
PQ580977	2524	1	DZY13_k141_4445	Betatorquevirus homini1
PQ580978	3641	1	DZY13_k141_4763	Alphatorquevirus homin10
PQ580979	2992	1	DZY13_k141_4939	Alphatorquevirus homin10
PQ580980	2700	1	DZY13_k141_5223	Alphatorquevirus homin10
PQ580981	2748	1	DZY13_k141_5884	Alphatorquevirus homin20
PQ580982	3034	1	DZY13_k141_7746	Alphatorquevirus homin1
PQ580983	2336	1	DZY13_k141_8142	Gammatorquevirus homidi6
PQ580984	3387	1	DZY13_k141_8223	Alphatorquevirus homin13
PQ580985	3501	1	DZY13_k141_8538	Alphatorquevirus homin13
PQ580986	2528	1	DZY13_k141_8659	Alphatorquevirus homin15
PQ580987	3048	1	DZY13_k141_8815	Alphatorquevirus homin24
PQ580988	2664	1	DZY13_k141_9007	Gammatorquevirus homidi11
PQ580989	2785	1	DZY13_k141_9218	Betatorquevirus homini36
PQ580990	2300	1	DZY13_k141_9732	Alphatorquevirus homin3
PQ580991	2504	1	DZY13_k141_10100	Gammatorquevirus
PQ580992	2797	1	DZY13_k141_10684	Alphatorquevirus homin10
PQ580993	2482	1	DZY13_k141_12059	Gammatorquevirus homidi11
PQ580994	3171	1	DZY13_k141_12287	Alphatorquevirus homin10
PQ580995	2742	1	DZY13_k141_13037	Betatorquevirus homini2
PQ580996	2835	1	DZY13_k141_13233	Alphatorquevirus homin10
PQ580997	3064	1	DZY13_k141_13855	Alphatorquevirus homin10
PQ580998	2652	1	DZY13_k141_14265	Alphatorquevirus homin24
PQ580999	3109	1	DZY13_k141_15676	Alphatorquevirus homin10
PQ581000	2112	1	DZY13_k141_18059	Gammatorquevirus homidi5
PQ581001	2352	1	DZY13_k141_18835	Alphatorquevirus homin21
PQ581002	2700	1	DZY13_k141_19017	Betatorquevirus homini2
PQ581003	2516	1	DZY13_k141_20285	Gammatorquevirus homidi9
PQ581004	2714	1	DZY13_k141_22537	Betatorquevirus homini33
PQ581005	3123	1	DZY13_k141_22871	Alphatorquevirus homin24
PQ581006	2636	1	DZY13_k141_22932	Gammatorquevirus homidi5
PQ581007	3100	1	DZY17_k141_5351	Alphatorquevirus homin3
PQ581008	3306	1	DZY17_k141_6212	Alphatorquevirus homin20
PQ581009	2511	1	DZY17_k141_12245	Alphatorquevirus homin3
PQ581010	3556	1	DZY17_k141_13546	Alphatorquevirus homin1
PQ581011	3114	1	DZY18_k141_4356	Alphatorquevirus homin1
PQ581012	2615	1	DZY20_k141_2907	Gammatorquevirus homidi13
PQ581013	2379	1	DZY20_k141_5337	Gammatorquevirus homidi5
PQ581014	2479	1	DZY20_k141_6765	Gammatorquevirus
PQ581015	2586	1	DZY20_k141_10150	Gammatorquevirus homidi13
PQ581016	2347	1	DZY20_k141_12777	Alphatorquevirus homin29
PQ581017	2535	1	DZY20_k141_22854	Betatorquevirus homini36
PQ581018	3140	1	DZY20_k141_23491	Alphatorquevirus homin15
PQ581019	2888	1	DZY20_k141_24039	Betatorquevirus homini36
PQ581020	3045	1	DZY20_k141_25692	Alphatorquevirus homin10
PQ581021	3434	1	DZY20_k141_25781	Alphatorquevirus homin20
PQ581022	3240	1	DZY23_k141_6560	Alphatorquevirus
PQ581023	2857	1	DZY01_k141_3406	Betatorquevirus homini1
PQ581024	2830	1	DZY07_k141_13528	Betatorquevirus homini20
PQ581025	2910	1	DZY09_k141_3522	Betatorquevirus
PQ581026	2895	1	DZY10_k141_6113	Betatorquevirus homini21
PQ581027	2837	1	DZY10_k141_22570	Betatorquevirus homini38
PQ581028	2882	1	DZY12_k141_6591	Betatorquevirus homini20
PQ581029	2828	1	DZY12_k141_12046	Betatorquevirus
PQ581030	2898	1	DZY22_k141_18209	Betatorquevirus
PV012293	5974	1	DZY04_k141_2212	human papillomavirus 84
PV012294	7930	1	DZY06_k141_3614	human papillomavirus 30
PV012295	3918	1	DZY08_k141_9645	human papillomavirus 87
PV012296	5506	1	DZY13_k141_3118	Human papillomavirus type 61
PV012297	7959	1	DZY13_k141_15605	human papillomavirus 58
PV012298	4391	1	DZY14_k141_3554	human papillomavirus 103
PV012299	2443	1	DZY14_k141_8375	human papillomavirus 43
PV012300	7925	1	DZY17_k141_10122	Human papillomavirus type 6
PV012301	7893	1	DZY17_k141_11685	human papillomavirus 33
PV012302	7195	1	DZY18_k141_12035	human papillomavirus 91
PV012303	7983	1	DZY20_k141_19781	Human papillomavirus type 90
PV012304	6390	1	DZY20_k141_24949	human papillomavirus 32
PV012305	5376	1	DZY23_k141_16224	human papillomavirus 84
PV012306	7825	1	DZY23_k141_18653	human papillomavirus 30
PV012307	2644	1	DZY24_k141_3644	human papillomavirus 91
PV012245	8031	1	DZY01_k141_2279	Human papillomavirus type 6
PV012246	7803	1	DZY01_k141_11212	human papillomavirus 67
PV012247	7705	1	DZY01_k141_13071	human papillomavirus 69
PV012248	7975	1	DZY03_k141_6151	human papillomavirus 43
PV012249	7997	1	DZY06_k141_4075	human papillomavirus 87
PV012250	7998	1	DZY06_k141_7091	human papillomavirus 87
PV012251	7852	1	DZY07_k141_20328	human papillomavirus 30
PV012252	7995	1	DZY07_k141_20365	human papillomavirus 87
PV012253	7870	1	DZY08_k141_10287	human papillomavirus 82
PV012254	8034	1	DZY08_k141_19595	Human papillomavirus type 90
PV012255	7158	1	DZY08_k141_19642	human papillomavirus 108
PV012256	7717	1	DZY09_k141_13817	Human papillomavirus type 54
PV012257	7975	1	DZY09_k141_13923	human papillomavirus 43
PV012258	7920	1	DZY10_k141_22625	human papillomavirus 42
PV012259	8070	1	DZY12_k141_12051	human papillomavirus 81
PV012260	7960	1	DZY12_k141_12067	human papillomavirus 52
PV012261	7878	1	DZY13_k141_23049	human papillomavirus 31
PV012262	7905	1	DZY13_k141_23055	Human papillomavirus 16
PV012263	7859	1	DZY13_k141_23072	Human papillomavirus type 53
PV012264	7811	1	DZY13_k141_23079	human papillomavirus 51
PV012265	7959	1	DZY13_k141_23149	human papillomavirus 91
PV012266	7859	1	DZY14_k141_6910	Human papillomavirus type 53
PV012267	7824	1	DZY14_k141_22047	human papillomavirus 58
PV012268	7920	1	DZY15_k141_11428	human papillomavirus 42
PV012269	7855	1	DZY15_k141_11430	Human papillomavirus type 26
PV012270	7897	1	DZY15_k141_11435	human papillomavirus 59
PV012271	7960	1	DZY16_k141_5994	human papillomavirus 52
PV012272	7959	1	DZY17_k141_8437	human papillomavirus 91
PV012273	7959	1	DZY17_k141_9627	human papillomavirus 91
PV012274	7953	1	DZY17_k141_9988	human papillomavirus 84
PV012275	8092	1	DZY17_k141_13636	human papillomavirus 62
PV012276	7770	1	DZY17_k141_13657	Human papillomavirus type 34
PV012277	7920	1	DZY17_k141_13721	human papillomavirus 42
PV012278	7760	1	DZY18_k141_23508	Human papillomavirus type 54
PV012279	8092	1	DZY20_k141_14446	human papillomavirus 62
PV012280	7906	1	DZY20_k141_18218	Human papillomavirus 16
PV012281	7994	1	DZY20_k141_22888	human papillomavirus 87
PV012282	7812	1	DZY20_k141_23168	human papillomavirus 51
PV012283	7975	1	DZY20_k141_25292	human papillomavirus 43
PV012284	7812	1	DZY20_k141_25332	human papillomavirus 51
PV012285	7898	1	DZY20_k141_25900	human papillomavirus 59
PV012286	7824	1	DZY20_k141_25928	human papillomavirus 58
PV012287	7313	1	DZY20_k141_25932	human papillomavirus 226
PV012288	7857	1	DZY20_k141_25955	human papillomavirus 18
PV012289	7957	1	DZY20_k141_25956	human papillomavirus 91
PV012290	7881	1	DZY20_k141_26274	human papillomavirus 30
PV012291	7835	1	DZY22_k141_23754	human papillomavirus 68
PV012292	7857	1	DZY22_k141_23763	human papillomavirus 18
PV067905	4571	1	DZY03_k141_6054	Gokushovirinae sp.
PV067906	4831	1	DZY07_k141_14612	Gokushovirinae sp.
PV067907	4531	1	DZY13_k141_23045	Gokushovirinae sp.
PV067908	4917	1	DZY17_k141_0	Gokushovirinae sp.
PV067909	4861	1	DZY17_k141_467	Gokushovirinae sp.
PV067910	4885	1	DZY17_k141_7806	Gokushovirinae sp.
PV067911	4470	1	DZY19_k141_3894	Gokushovirinae sp.
PV067912	4760	1	DZY19_k141_10386	Gokushovirinae sp.
PV067913	4740	1	DZY19_k141_20372	Gokushovirinae sp.
PV067914	5583	1	DZY20_k141_26004	Gokushovirinae sp.
PV067915	6305	1	DZY02_k141_12826	Microviridae sp.
PV067916	5184	1	DZY04_k141_2042	Microviridae sp.
PV067917	6108	1	DZY05_k141_3183	Microviridae sp.
PV067918	5168	1	DZY05_k141_10672	Microviridae sp.
PV067919	6968	1	DZY07_k141_12628	Microviridae sp.
PV067920	6145	1	DZY08_k141_19861	Microviridae sp.
PV067921	5108	1	DZY10_k141_6677	Microviridae sp.
PV067922	6142	1	DZY10_k141_13827	Microviridae sp.
PV067923	6188	1	DZY10_k141_22512	Microviridae sp.
PV067924	6085	1	DZY11_k141_4555	Microviridae sp.
PV067925	6035	1	DZY15_k141_2869	Microviridae sp.
PV067926	6278	1	DZY17_k141_6166	Microviridae sp.
PV067927	6082	1	DZY20_k141_25887	Microviridae sp.
PV067928	6308	1	DZY23_k141_8073	Microviridae sp.
PV093571	39563	1	DZY02_k141_12532	Ackermannviridae sp.
PV093572	20778	1	DZY02_k141_12537	Casjensviridae sp.
PV093573	18601	1	DZY05_k141_7901	Casjensviridae sp.
PV093574	37873	1	DZY09_k141_8343	Casjensviridae sp.
PV093575	25258	1	DZY10_k141_16913	Casjensviridae sp.
PV093576	41064	1	DZY10_k141_21376	Casjensviridae sp.
PV093577	40893	1	DZY02_k141_8935	Caudoviricetes sp.
PV093578	21038	1	DZY02_k141_10529	Caudoviricetes sp.
PV093579	42261	1	DZY05_k141_10642	Caudoviricetes sp.
PV093580	34253	1	DZY07_k141_18165	Caudoviricetes sp.
PV093581	38098	1	DZY08_k141_2288	Caudoviricetes sp.
PV093582	53107	1	DZY09_k141_21200	Caudoviricetes sp.
PV093583	39677	1	DZY10_k141_18394	Caudoviricetes sp.
PV093584	43877	1	DZY10_k141_18920	Caudoviricetes sp.
PV093585	32739	1	DZY10_k141_22005	Caudoviricetes sp.
PV093586	23075	1	DZY11_k141_11610	Caudoviricetes sp.
PV093587	18761	1	DZY11_k141_12678	Caudoviricetes sp.
PV093588	17429	1	DZY11_k141_15229	Caudoviricetes sp.
PV093589	31720	1	DZY12_k141_10925	Caudoviricetes sp.
PV093590	40594	1	DZY20_k141_11431	Caudoviricetes sp.
PV093591	24447	1	DZY10_k141_20080	Drexlerviridae sp.
PV093592	29509	1	DZY10_k141_21116	Drexlerviridae sp.
PV093593	3991	1	DZY05_k141_4867	Gokushovirinae sp.
PV093594	4095	1	DZY11_k141_10256	Gokushovirinae sp.
PV093595	4408	1	DZY13_k141_13824	Gokushovirinae sp.
PV093596	4157	1	DZY14_k141_12649	Gokushovirinae sp.
PV093597	3830	1	DZY19_k141_10263	Gokushovirinae sp.
PV093598	4930	1	DZY23_k141_5839	Gokushovirinae sp.
PV093599	35373	1	DZY09_k141_18770	Guelinviridae sp.
PV093600	37809	1	DZY13_k141_9269	Guelinviridae sp.
PV093601	43145	1	DZY18_k141_23506	Herelleviridae sp.
PV093602	6271	1	DZY07_k141_6906	Microviridae sp.
PV093603	6356	1	DZY09_k141_15285	Microviridae sp.
PV093604	5300	1	DZY12_k141_6430	Microviridae sp.
PV093605	6496	1	DZY16_k141_3734	Microviridae sp.
PV093606	5216	1	DZY19_k141_12626	Microviridae sp.
PV093607	5262	1	DZY19_k141_18915	Microviridae sp.
PV093608	5398	1	DZY20_k141_8577	Microviridae sp.
PV093609	5986	1	DZY20_k141_12405	Microviridae sp.
PV093610	5000	1	DZY21_k141_12123	Microviridae sp.
PV093611	5576	1	DZY23_k141_3168	Microviridae sp.
PV093612	16487	1	DZY01_k141_15715	Orlajensenviridae sp.
PV093613	14722	1	DZY01_k141_15722	Orlajensenviridae sp.
PV093614	16469	1	DZY01_k141_15590	Salasmaviridae sp.
PV093615	16074	1	DZY02_k141_8662	Salasmaviridae sp.
PV093616	43086	1	DZY01_k141_15569	Straboviridae sp.
PV093617	25041	1	DZY02_k141_6535	Straboviridae sp.
PV093618	42737	1	DZY07_k141_19961	Straboviridae sp.
PV093619	36636	1	DZY08_k141_10755	Straboviridae sp.
PV093620	32968	1	DZY20_k141_25896	Straboviridae sp.
PV093621	36388	1	DZY01_k141_15428	Vilmaviridae sp.
PV093622	26519	1	DZY18_k141_21279	Viruses sp.
PV093623	29631	1	DZY20_k141_25886	Viruses sp.
PV093624	58715	1	DZY24_k141_6096	Zierdtviridae sp.

## Sheet: Supplementary Table 3
Supplementary Table 3. The detailed information of viral clusters.
Genome	Kingdom	Phylum	Class	Order	Family	Genus	preVC	VC Status	VC	VC Size	Quality	Adjusted P-value	VC Avg Distance	Topology Confidence Score	Genus Confidence Score	VC Kingdoms	VC Phyla	VC Classes	VC Orders	VC Families	VC Genera
DZY24_k141_6096	Unassigned	Unassigned	Unassigned	Unassigned	Unassigned	Unassigned		Singleton
DZY01_k141_15428	Unassigned	Unassigned	Unassigned	Unassigned	Unassigned	Unassigned		Outlier
DZY01_k141_15569	Unassigned	Unassigned	Unassigned	Unassigned	Unassigned	Unassigned		Outlier
DZY01_k141_15590	Unassigned	Unassigned	Unassigned	Unassigned	Unassigned	Unassigned	preVC_82	Clustered	VC_82_0	2	0.823	0.838827	0	0.6904	1	0	0	0	0	0	0
DZY01_k141_15715	Unassigned	Unassigned	Unassigned	Unassigned	Unassigned	Unassigned		Outlier
DZY01_k141_15722	Unassigned	Unassigned	Unassigned	Unassigned	Unassigned	Unassigned		Outlier
DZY02_k141_10529	Unassigned	Unassigned	Unassigned	Unassigned	Unassigned	Unassigned	preVC_280	Clustered	VC_280_0	2	0.1787	0.901257	4.47214	0.161	1	0	0	0	0	0	0
DZY02_k141_12532	Unassigned	Unassigned	Unassigned	Unassigned	Unassigned	Unassigned	preVC_345	Clustered	VC_345_0	4	0.4814	0.99315	6.42251	0.4781	1	1	1	1	1	1	0
DZY02_k141_12537	Unassigned	Unassigned	Unassigned	Unassigned	Unassigned	Unassigned		Overlap (VC_194/VC_199)
DZY02_k141_12826	Unassigned	Unassigned	Unassigned	Unassigned	Unassigned	Unassigned	preVC_202	Clustered	VC_202_0	10	0.7131	1	1.34852	0.7131	1	0	0	0	0	0	0
DZY02_k141_6535	Unassigned	Unassigned	Unassigned	Unassigned	Unassigned	Unassigned	preVC_198	Clustered	VC_198_0	4	0.6672	0.999539	4.7149	0.6669	1	0	0	0	0	0	0
DZY02_k141_8662	Unassigned	Unassigned	Unassigned	Unassigned	Unassigned	Unassigned	preVC_82	Clustered	VC_82_0	2	0.823	0.838827	0	0.6904	1	0	0	0	0	0	0
DZY02_k141_8935	Unassigned	Unassigned	Unassigned	Unassigned	Unassigned	Unassigned	preVC_197	Clustered	VC_197_0	5	1	0	3.84187	0	1	0	0	0	0	0	0
DZY03_k141_6054	Unassigned	Unassigned	Unassigned	Unassigned	Unassigned	Unassigned		Overlap (VC_270/VC_321)
DZY04_k141_2042	Unassigned	Unassigned	Unassigned	Unassigned	Unassigned	Unassigned	preVC_205	Clustered	VC_205_0	7	1	0	0	0	1	0	0	0	0	0	0
DZY05_k141_10642	Unassigned	Unassigned	Unassigned	Unassigned	Unassigned	Unassigned		Overlap (VC_86/VC_90/VC_399)
DZY05_k141_10672	Unassigned	Unassigned	Unassigned	Unassigned	Unassigned	Unassigned	preVC_205	Clustered	VC_205_0	7	1	0	0	0	1	0	0	0	0	0	0
DZY05_k141_3183	Unassigned	Unassigned	Unassigned	Unassigned	Unassigned	Unassigned		Overlap (VC_184/VC_185)
DZY05_k141_4867	Unassigned	Unassigned	Unassigned	Unassigned	Unassigned	Unassigned		Overlap (VC_191/VC_272)
DZY05_k141_7901	Unassigned	Unassigned	Unassigned	Unassigned	Unassigned	Unassigned		Overlap (VC_194/VC_199)
DZY07_k141_12628	Unassigned	Unassigned	Unassigned	Unassigned	Unassigned	Unassigned	preVC_185	Clustered	VC_185_0	29	0.9718	1	0.949086	0.9718	1	0	0	0	0	0	0
DZY07_k141_14612	Unassigned	Unassigned	Unassigned	Unassigned	Unassigned	Unassigned	preVC_375	Clustered	VC_375_0	12	1	0	0	0	1	0	0	0	0	0	0
DZY07_k141_18165	Unassigned	Unassigned	Unassigned	Unassigned	Unassigned	Unassigned	preVC_198	Clustered	VC_198_0	4	0.6672	0.999539	4.7149	0.6669	1	0	0	0	0	0	0
DZY07_k141_19961	Unassigned	Unassigned	Unassigned	Unassigned	Unassigned	Unassigned	preVC_371	Clustered	VC_371_0	4	0.1711	0.999474	6.61884	0.171	1	1	1	1	1	1	0
DZY07_k141_6906	Unassigned	Unassigned	Unassigned	Unassigned	Unassigned	Unassigned	preVC_195	Clustered	VC_195_0	22	0.9826	1	2.07645	0.9826	1	0	0	0	0	0	0
DZY08_k141_10755	Unassigned	Unassigned	Unassigned	Unassigned	Unassigned	Unassigned	preVC_198	Clustered	VC_198_0	4	0.6672	0.999539	4.7149	0.6669	1	0	0	0	0	0	0
DZY08_k141_19861	Unassigned	Unassigned	Unassigned	Unassigned	Unassigned	Unassigned	preVC_183	Clustered	VC_183_0	7	0.6944	1	0.706116	0.6944	1	0	0	0	0	0	0
DZY08_k141_2288	Unassigned	Unassigned	Unassigned	Unassigned	Unassigned	Unassigned	preVC_280	Clustered	VC_280_0	2	0.1787	0.901257	4.47214	0.161	1	0	0	0	0	0	0
DZY09_k141_15285	Unassigned	Unassigned	Unassigned	Unassigned	Unassigned	Unassigned	preVC_183	Clustered	VC_183_0	7	0.6944	1	0.706116	0.6944	1	0	0	0	0	0	0
DZY09_k141_18770	Unassigned	Unassigned	Unassigned	Unassigned	Unassigned	Unassigned	preVC_372	Clustered	VC_372_0	2	0.3689	0.901881	2	0.3327	1	0	0	0	0	0	0
DZY09_k141_21200	Unassigned	Unassigned	Unassigned	Unassigned	Unassigned	Unassigned	preVC_345	Clustered	VC_345_0	4	0.4814	0.99315	6.42251	0.4781	1	1	1	1	1	1	0
DZY09_k141_8343	Unassigned	Unassigned	Unassigned	Unassigned	Unassigned	Unassigned		Outlier
DZY10_k141_13827	Unassigned	Unassigned	Unassigned	Unassigned	Unassigned	Unassigned	preVC_183	Clustered	VC_183_0	7	0.6944	1	0.706116	0.6944	1	0	0	0	0	0	0
DZY10_k141_16913	Unassigned	Unassigned	Unassigned	Unassigned	Unassigned	Unassigned		Overlap (VC_194/VC_199)
DZY10_k141_18394	Unassigned	Unassigned	Unassigned	Unassigned	Unassigned	Unassigned		Outlier
DZY10_k141_18920	Unassigned	Unassigned	Unassigned	Unassigned	Unassigned	Unassigned	preVC_206	Clustered	VC_206_0	4	0.9828	0.986078	4.50827	0.9691	1	0	0	0	0	0	0
DZY10_k141_20080	Unassigned	Unassigned	Unassigned	Unassigned	Unassigned	Unassigned	preVC_199	Clustered	VC_199_0	2	0.7342	0.82837	3.60555	0.6082	1	0	0	0	0	0	0
DZY10_k141_21116	Unassigned	Unassigned	Unassigned	Unassigned	Unassigned	Unassigned	preVC_199	Clustered	VC_199_0	2	0.7342	0.82837	3.60555	0.6082	1	0	0	0	0	0	0
DZY10_k141_21376	Unassigned	Unassigned	Unassigned	Unassigned	Unassigned	Unassigned	preVC_345	Clustered	VC_345_0	4	0.4814	0.99315	6.42251	0.4781	1	1	1	1	1	1	0
DZY10_k141_22005	Unassigned	Unassigned	Unassigned	Unassigned	Unassigned	Unassigned		Outlier
DZY10_k141_22512	Unassigned	Unassigned	Unassigned	Unassigned	Unassigned	Unassigned	preVC_202	Clustered	VC_202_0	10	0.7131	1	1.34852	0.7131	1	0	0	0	0	0	0
DZY10_k141_6677	Unassigned	Unassigned	Unassigned	Unassigned	Unassigned	Unassigned	preVC_205	Clustered	VC_205_0	7	1	0	0	0	1	0	0	0	0	0	0
DZY11_k141_10256	Unassigned	Unassigned	Unassigned	Unassigned	Unassigned	Unassigned	preVC_190	Clustered	VC_190_0	43	0.3968	1	1.87017	0.3968	1	1	1	1	1	1	1
DZY11_k141_11610	Unassigned	Unassigned	Unassigned	Unassigned	Unassigned	Unassigned	preVC_192	Clustered	VC_192_0	3	0.6079	0.993669	5.76471	0.604	1	0	0	0	0	0	0
DZY11_k141_12678	Unassigned	Unassigned	Unassigned	Unassigned	Unassigned	Unassigned		Outlier
DZY11_k141_15229	Unassigned	Unassigned	Unassigned	Unassigned	Unassigned	Unassigned	preVC_194	Clustered	VC_194_0	9	0.5321	1	6.92423	0.5321	1	1	1	1	1	1	0
DZY11_k141_4555	Unassigned	Unassigned	Unassigned	Unassigned	Unassigned	Unassigned		Overlap (VC_184/VC_185)
DZY12_k141_10925	Unassigned	Unassigned	Unassigned	Unassigned	Unassigned	Unassigned	preVC_194	Clustered	VC_194_0	9	0.5321	1	6.92423	0.5321	1	1	1	1	1	1	0
DZY12_k141_6430	Unassigned	Unassigned	Unassigned	Unassigned	Unassigned	Unassigned	preVC_205	Clustered	VC_205_0	7	1	0	0	0	1	0	0	0	0	0	0
DZY13_k141_13824	Unassigned	Unassigned	Unassigned	Unassigned	Unassigned	Unassigned		Outlier
DZY13_k141_23045	Unassigned	Unassigned	Unassigned	Unassigned	Unassigned	Unassigned		Overlap (VC_270/VC_321)
DZY13_k141_9269	Unassigned	Unassigned	Unassigned	Unassigned	Unassigned	Unassigned	preVC_372	Clustered	VC_372_0	2	0.3689	0.901881	2	0.3327	1	0	0	0	0	0	0
DZY14_k141_12649	Unassigned	Unassigned	Unassigned	Unassigned	Unassigned	Unassigned		Overlap (VC_321/VC_383)
DZY15_k141_2869	Unassigned	Unassigned	Unassigned	Unassigned	Unassigned	Unassigned	preVC_202	Clustered	VC_202_0	10	0.7131	1	1.34852	0.7131	1	0	0	0	0	0	0
DZY16_k141_3734	Unassigned	Unassigned	Unassigned	Unassigned	Unassigned	Unassigned	preVC_202	Clustered	VC_202_0	10	0.7131	1	1.34852	0.7131	1	0	0	0	0	0	0
DZY17_k141_0	Unassigned	Unassigned	Unassigned	Unassigned	Unassigned	Unassigned	preVC_180	Clustered	VC_180_0	30	0.9689	1	0.525513	0.9689	1	0	0	0	0	0	0
DZY17_k141_467	Unassigned	Unassigned	Unassigned	Unassigned	Unassigned	Unassigned	preVC_180	Clustered	VC_180_0	30	0.9689	1	0.525513	0.9689	1	0	0	0	0	0	0
DZY17_k141_6166	Unassigned	Unassigned	Unassigned	Unassigned	Unassigned	Unassigned	preVC_202	Clustered	VC_202_0	10	0.7131	1	1.34852	0.7131	1	0	0	0	0	0	0
DZY17_k141_7806	Unassigned	Unassigned	Unassigned	Unassigned	Unassigned	Unassigned	preVC_180	Clustered	VC_180_0	30	0.9689	1	0.525513	0.9689	1	0	0	0	0	0	0
DZY18_k141_21279	Unassigned	Unassigned	Unassigned	Unassigned	Unassigned	Unassigned		Outlier
DZY18_k141_23506	Unassigned	Unassigned	Unassigned	Unassigned	Unassigned	Unassigned		Overlap (VC_138/VC_139/VC_141)
DZY19_k141_10263	Unassigned	Unassigned	Unassigned	Unassigned	Unassigned	Unassigned		Outlier
DZY19_k141_10386	Unassigned	Unassigned	Unassigned	Unassigned	Unassigned	Unassigned		Overlap (VC_191/VC_272)
DZY19_k141_12626	Unassigned	Unassigned	Unassigned	Unassigned	Unassigned	Unassigned	preVC_384	Clustered	VC_384_0	38	0.7152	1	1.42943	0.7152	1	0	0	0	0	0	0
DZY19_k141_18915	Unassigned	Unassigned	Unassigned	Unassigned	Unassigned	Unassigned	preVC_387	Clustered	VC_387_0	3	1	0	1.57735	0	1	0	0	0	0	0	0
DZY19_k141_20372	Unassigned	Unassigned	Unassigned	Unassigned	Unassigned	Unassigned	preVC_375	Clustered	VC_375_0	12	1	0	0	0	1	0	0	0	0	0	0
DZY19_k141_3894	Unassigned	Unassigned	Unassigned	Unassigned	Unassigned	Unassigned	preVC_190	Clustered	VC_190_0	43	0.3968	1	1.87017	0.3968	1	1	1	1	1	1	1
DZY20_k141_11431	Unassigned	Unassigned	Unassigned	Unassigned	Unassigned	Unassigned	preVC_371	Clustered	VC_371_0	4	0.1711	0.999474	6.61884	0.171	1	1	1	1	1	1	0
DZY20_k141_12405	Unassigned	Unassigned	Unassigned	Unassigned	Unassigned	Unassigned	preVC_186	Clustered	VC_186_0	21	1	0	1.57463	0	1	0	0	0	0	0	0
DZY20_k141_25886	Unassigned	Unassigned	Unassigned	Unassigned	Unassigned	Unassigned	preVC_389	Clustered	VC_389_0	71	1	0	3.63112	0	1	1	1	1	1	1	1
DZY20_k141_25887	Unassigned	Unassigned	Unassigned	Unassigned	Unassigned	Unassigned	preVC_195	Clustered	VC_195_0	22	0.9826	1	2.07645	0.9826	1	0	0	0	0	0	0
DZY20_k141_25896	Unassigned	Unassigned	Unassigned	Unassigned	Unassigned	Unassigned	preVC_198	Clustered	VC_198_0	4	0.6672	0.999539	4.7149	0.6669	1	0	0	0	0	0	0
DZY20_k141_26004	Unassigned	Unassigned	Unassigned	Unassigned	Unassigned	Unassigned	preVC_179	Clustered	VC_179_0	21	0.9557	1	1.43053	0.9557	1	0	0	0	0	0	0
DZY20_k141_8577	Unassigned	Unassigned	Unassigned	Unassigned	Unassigned	Unassigned	preVC_187	Clustered	VC_187_0	23	0.8461	1	0.829629	0.8461	1	0	0	0	0	0	0
DZY21_k141_12123	Unassigned	Unassigned	Unassigned	Unassigned	Unassigned	Unassigned	preVC_183	Clustered	VC_183_0	7	0.6944	1	0.706116	0.6944	1	0	0	0	0	0	0
DZY23_k141_3168	Unassigned	Unassigned	Unassigned	Unassigned	Unassigned	Unassigned	preVC_185	Clustered	VC_185_0	29	0.9718	1	0.949086	0.9718	1	0	0	0	0	0	0
DZY23_k141_5839	Unassigned	Unassigned	Unassigned	Unassigned	Unassigned	Unassigned	preVC_196	Clustered	VC_196_0	21	1	0	0.492624	0	1	0	0	0	0	0	0
DZY23_k141_8073	Unassigned	Unassigned	Unassigned	Unassigned	Unassigned	Unassigned	preVC_202	Clustered	VC_202_0	10	0.7131	1	1.34852	0.7131	1	0	0	0	0	0	0
BK014845	Sangervirae	Phixviricota	Malgrandaviricetes	Petitvirales	Microviridae		preVC_179	Clustered	VC_179_0	21	0.9557	1	1.43053	0.9557	1	0	0	0	0	0	0
BK014958	Sangervirae	Phixviricota	Malgrandaviricetes	Petitvirales	Microviridae		preVC_179	Clustered	VC_179_0	21	0.9557	1	1.43053	0.9557	1	0	0	0	0	0	0
BK014977	Sangervirae	Phixviricota	Malgrandaviricetes	Petitvirales	Microviridae		preVC_180	Clustered	VC_180_0	30	0.9689	1	0.525513	0.9689	1	0	0	0	0	0	0
BK015151	Sangervirae	Phixviricota	Malgrandaviricetes	Petitvirales	Microviridae		preVC_180	Clustered	VC_180_0	30	0.9689	1	0.525513	0.9689	1	0	0	0	0	0	0
BK015236	Sangervirae	Phixviricota	Malgrandaviricetes	Petitvirales	Microviridae		preVC_180	Clustered	VC_180_0	30	0.9689	1	0.525513	0.9689	1	0	0	0	0	0	0
BK015704	Sangervirae	Phixviricota	Malgrandaviricetes	Petitvirales	Microviridae			Overlap (VC_183/VC_184)
BK016116	Sangervirae	Phixviricota	Malgrandaviricetes	Petitvirales	Microviridae		preVC_185	Clustered	VC_185_0	29	0.9718	1	0.949086	0.9718	1	0	0	0	0	0	0
BK016118	Sangervirae	Phixviricota	Malgrandaviricetes	Petitvirales	Microviridae		preVC_185	Clustered	VC_185_0	29	0.9718	1	0.949086	0.9718	1	0	0	0	0	0	0
BK016218	Sangervirae	Phixviricota	Malgrandaviricetes	Petitvirales	Microviridae		preVC_186	Clustered	VC_186_0	21	1	0	1.57463	0	1	0	0	0	0	0	0
BK016435	Sangervirae	Phixviricota	Malgrandaviricetes	Petitvirales	Microviridae		preVC_187	Clustered	VC_187_0	23	0.8461	1	0.829629	0.8461	1	0	0	0	0	0	0
BK016609	Sangervirae	Phixviricota	Malgrandaviricetes	Petitvirales	Microviridae		preVC_180	Clustered	VC_180_0	30	0.9689	1	0.525513	0.9689	1	0	0	0	0	0	0
BK017290	Sangervirae	Phixviricota	Malgrandaviricetes	Petitvirales	Microviridae		preVC_187	Clustered	VC_187_0	23	0.8461	1	0.829629	0.8461	1	0	0	0	0	0	0
BK017402	Sangervirae	Phixviricota	Malgrandaviricetes	Petitvirales	Microviridae		preVC_187	Clustered	VC_187_0	23	0.8461	1	0.829629	0.8461	1	0	0	0	0	0	0
BK017542	Sangervirae	Phixviricota	Malgrandaviricetes	Petitvirales	Microviridae		preVC_180	Clustered	VC_180_0	30	0.9689	1	0.525513	0.9689	1	0	0	0	0	0	0
BK018844	Heunggongvirae	Uroviricota	Caudoviricetes				preVC_192	Clustered	VC_192_0	3	0.6079	0.993669	5.76471	0.604	1	0	0	0	0	0	0
BK019431	Sangervirae	Phixviricota	Malgrandaviricetes	Petitvirales	Microviridae		preVC_179	Clustered	VC_179_0	21	0.9557	1	1.43053	0.9557	1	0	0	0	0	0	0
BK019491	Sangervirae	Phixviricota	Malgrandaviricetes	Petitvirales	Microviridae		preVC_179	Clustered	VC_179_0	21	0.9557	1	1.43053	0.9557	1	0	0	0	0	0	0
BK019536	Sangervirae	Phixviricota	Malgrandaviricetes	Petitvirales	Microviridae		preVC_195	Clustered	VC_195_0	22	0.9826	1	2.07645	0.9826	1	0	0	0	0	0	0
BK019618	Sangervirae	Phixviricota	Malgrandaviricetes	Petitvirales	Microviridae		preVC_195	Clustered	VC_195_0	22	0.9826	1	2.07645	0.9826	1	0	0	0	0	0	0
BK019989	Sangervirae	Phixviricota	Malgrandaviricetes	Petitvirales	Microviridae		preVC_185	Clustered	VC_185_0	29	0.9718	1	0.949086	0.9718	1	0	0	0	0	0	0
BK020428	Sangervirae	Phixviricota	Malgrandaviricetes	Petitvirales	Microviridae		preVC_179	Clustered	VC_179_0	21	0.9557	1	1.43053	0.9557	1	0	0	0	0	0	0
BK020625	Sangervirae	Phixviricota	Malgrandaviricetes	Petitvirales	Microviridae		preVC_180	Clustered	VC_180_0	30	0.9689	1	0.525513	0.9689	1	0	0	0	0	0	0
BK021170	Sangervirae	Phixviricota	Malgrandaviricetes	Petitvirales	Microviridae		preVC_196	Clustered	VC_196_0	21	1	0	0.492624	0	1	0	0	0	0	0	0
BK021400	Sangervirae	Phixviricota	Malgrandaviricetes	Petitvirales	Microviridae		preVC_180	Clustered	VC_180_0	30	0.9689	1	0.525513	0.9689	1	0	0	0	0	0	0
BK021499	Sangervirae	Phixviricota	Malgrandaviricetes	Petitvirales	Microviridae		preVC_180	Clustered	VC_180_0	30	0.9689	1	0.525513	0.9689	1	0	0	0	0	0	0
BK021589	Heunggongvirae	Uroviricota	Caudoviricetes				preVC_197	Clustered	VC_197_0	5	1	0	3.84187	0	1	0	0	0	0	0	0
BK021690	Sangervirae	Phixviricota	Malgrandaviricetes	Petitvirales	Microviridae		preVC_180	Clustered	VC_180_0	30	0.9689	1	0.525513	0.9689	1	0	0	0	0	0	0
BK021849	Sangervirae	Phixviricota	Malgrandaviricetes	Petitvirales	Microviridae		preVC_179	Clustered	VC_179_0	21	0.9557	1	1.43053	0.9557	1	0	0	0	0	0	0
BK021885	Sangervirae	Phixviricota	Malgrandaviricetes	Petitvirales	Microviridae		preVC_196	Clustered	VC_196_0	21	1	0	0.492624	0	1	0	0	0	0	0	0
BK022745	Sangervirae	Phixviricota	Malgrandaviricetes	Petitvirales	Microviridae			Overlap (VC_183/VC_184)
BK023679	Sangervirae	Phixviricota	Malgrandaviricetes	Petitvirales	Microviridae		preVC_195	Clustered	VC_195_0	22	0.9826	1	2.07645	0.9826	1	0	0	0	0	0	0
BK023890	Sangervirae	Phixviricota	Malgrandaviricetes	Petitvirales	Microviridae		preVC_187	Clustered	VC_187_0	23	0.8461	1	0.829629	0.8461	1	0	0	0	0	0	0
BK023987	Sangervirae	Phixviricota	Malgrandaviricetes	Petitvirales	Microviridae		preVC_187	Clustered	VC_187_0	23	0.8461	1	0.829629	0.8461	1	0	0	0	0	0	0
BK024024	Sangervirae	Phixviricota	Malgrandaviricetes	Petitvirales	Microviridae		preVC_195	Clustered	VC_195_0	22	0.9826	1	2.07645	0.9826	1	0	0	0	0	0	0
BK024075	Sangervirae	Phixviricota	Malgrandaviricetes	Petitvirales	Microviridae		preVC_195	Clustered	VC_195_0	22	0.9826	1	2.07645	0.9826	1	0	0	0	0	0	0
BK024174	Sangervirae	Phixviricota	Malgrandaviricetes	Petitvirales	Microviridae		preVC_195	Clustered	VC_195_0	22	0.9826	1	2.07645	0.9826	1	0	0	0	0	0	0
BK024270	Sangervirae	Phixviricota	Malgrandaviricetes	Petitvirales	Microviridae		preVC_180	Clustered	VC_180_0	30	0.9689	1	0.525513	0.9689	1	0	0	0	0	0	0
BK024356	Sangervirae	Phixviricota	Malgrandaviricetes	Petitvirales	Microviridae		preVC_180	Clustered	VC_180_0	30	0.9689	1	0.525513	0.9689	1	0	0	0	0	0	0
BK024376	Sangervirae	Phixviricota	Malgrandaviricetes	Petitvirales	Microviridae		preVC_180	Clustered	VC_180_0	30	0.9689	1	0.525513	0.9689	1	0	0	0	0	0	0
BK024729	Heunggongvirae	Uroviricota	Caudoviricetes				preVC_191	Clustered	VC_191_0	2	0.4006	0.871678	4.69042	0.3492	1	0	0	0	0	0	0
BK025023	Sangervirae	Phixviricota	Malgrandaviricetes	Petitvirales	Microviridae		preVC_180	Clustered	VC_180_0	30	0.9689	1	0.525513	0.9689	1	0	0	0	0	0	0
BK025050	Sangervirae	Phixviricota	Malgrandaviricetes	Petitvirales	Microviridae		preVC_180	Clustered	VC_180_0	30	0.9689	1	0.525513	0.9689	1	0	0	0	0	0	0
BK025144	Heunggongvirae	Uroviricota	Caudoviricetes				preVC_191	Clustered	VC_191_0	2	0.4006	0.871678	4.69042	0.3492	1	0	0	0	0	0	0
BK025173	Sangervirae	Phixviricota	Malgrandaviricetes	Petitvirales	Microviridae		preVC_179	Clustered	VC_179_0	21	0.9557	1	1.43053	0.9557	1	0	0	0	0	0	0
BK025881	Sangervirae	Phixviricota	Malgrandaviricetes	Petitvirales	Microviridae		preVC_180	Clustered	VC_180_0	30	0.9689	1	0.525513	0.9689	1	0	0	0	0	0	0
BK026243	Sangervirae	Phixviricota	Malgrandaviricetes	Petitvirales	Microviridae		preVC_187	Clustered	VC_187_0	23	0.8461	1	0.829629	0.8461	1	0	0	0	0	0	0
BK026421	Sangervirae	Phixviricota	Malgrandaviricetes	Petitvirales	Microviridae		preVC_180	Clustered	VC_180_0	30	0.9689	1	0.525513	0.9689	1	0	0	0	0	0	0
BK026519	Sangervirae	Phixviricota	Malgrandaviricetes	Petitvirales	Microviridae		preVC_179	Clustered	VC_179_0	21	0.9557	1	1.43053	0.9557	1	0	0	0	0	0	0
BK026898	Sangervirae	Phixviricota	Malgrandaviricetes	Petitvirales	Microviridae		preVC_185	Clustered	VC_185_0	29	0.9718	1	0.949086	0.9718	1	0	0	0	0	0	0
BK026921	Sangervirae	Phixviricota	Malgrandaviricetes	Petitvirales	Microviridae		preVC_196	Clustered	VC_196_0	21	1	0	0.492624	0	1	0	0	0	0	0	0
BK027140	Sangervirae	Phixviricota	Malgrandaviricetes	Petitvirales	Microviridae		preVC_195	Clustered	VC_195_0	22	0.9826	1	2.07645	0.9826	1	0	0	0	0	0	0
BK027477	Sangervirae	Phixviricota	Malgrandaviricetes	Petitvirales	Microviridae		preVC_185	Clustered	VC_185_0	29	0.9718	1	0.949086	0.9718	1	0	0	0	0	0	0
BK027604	Sangervirae	Phixviricota	Malgrandaviricetes	Petitvirales	Microviridae		preVC_185	Clustered	VC_185_0	29	0.9718	1	0.949086	0.9718	1	0	0	0	0	0	0
BK028251	Sangervirae	Phixviricota	Malgrandaviricetes	Petitvirales	Microviridae		preVC_185	Clustered	VC_185_0	29	0.9718	1	0.949086	0.9718	1	0	0	0	0	0	0
BK028404	Sangervirae	Phixviricota	Malgrandaviricetes	Petitvirales	Microviridae		preVC_179	Clustered	VC_179_0	21	0.9557	1	1.43053	0.9557	1	0	0	0	0	0	0
BK028447	Sangervirae	Phixviricota	Malgrandaviricetes	Petitvirales	Microviridae		preVC_187	Clustered	VC_187_0	23	0.8461	1	0.829629	0.8461	1	0	0	0	0	0	0
BK028646	Sangervirae	Phixviricota	Malgrandaviricetes	Petitvirales	Microviridae		preVC_195	Clustered	VC_195_0	22	0.9826	1	2.07645	0.9826	1	0	0	0	0	0	0
BK028651	Sangervirae	Phixviricota	Malgrandaviricetes	Petitvirales	Microviridae		preVC_186	Clustered	VC_186_0	21	1	0	1.57463	0	1	0	0	0	0	0	0
BK028677	Heunggongvirae	Uroviricota	Caudoviricetes				preVC_197	Clustered	VC_197_0	5	1	0	3.84187	0	1	0	0	0	0	0	0
BK029146	Sangervirae	Phixviricota	Malgrandaviricetes	Petitvirales	Microviridae			Overlap (VC_188/VC_189)
BK029217	Sangervirae	Phixviricota	Malgrandaviricetes	Petitvirales	Microviridae			Overlap (VC_188/VC_189)
BK029368	Sangervirae	Phixviricota	Malgrandaviricetes	Petitvirales	Microviridae		preVC_186	Clustered	VC_186_0	21	1	0	1.57463	0	1	0	0	0	0	0	0
BK029383	Sangervirae	Phixviricota	Malgrandaviricetes	Petitvirales	Microviridae		preVC_186	Clustered	VC_186_0	21	1	0	1.57463	0	1	0	0	0	0	0	0
BK029694	Sangervirae	Phixviricota	Malgrandaviricetes	Petitvirales	Microviridae		preVC_183	Clustered	VC_183_0	7	0.6944	1	0.706116	0.6944	1	0	0	0	0	0	0
BK030392	Sangervirae	Phixviricota	Malgrandaviricetes	Petitvirales	Microviridae		preVC_196	Clustered	VC_196_0	21	1	0	0.492624	0	1	0	0	0	0	0	0
BK030624	Sangervirae	Phixviricota	Malgrandaviricetes	Petitvirales	Microviridae		preVC_179	Clustered	VC_179_0	21	0.9557	1	1.43053	0.9557	1	0	0	0	0	0	0
BK030845	Sangervirae	Phixviricota	Malgrandaviricetes	Petitvirales	Microviridae		preVC_201	Clustered	VC_201_0	7	0.5481	1	2.39175	0.5481	1	0	0	0	0	0	0
BK031675	Sangervirae	Phixviricota	Malgrandaviricetes	Petitvirales	Microviridae		preVC_179	Clustered	VC_179_0	21	0.9557	1	1.43053	0.9557	1	0	0	0	0	0	0
BK031876	Sangervirae	Phixviricota	Malgrandaviricetes	Petitvirales	Microviridae		preVC_185	Clustered	VC_185_0	29	0.9718	1	0.949086	0.9718	1	0	0	0	0	0	0
BK032323	Heunggongvirae	Uroviricota	Caudoviricetes				preVC_192	Clustered	VC_192_0	3	0.6079	0.993669	5.76471	0.604	1	0	0	0	0	0	0
BK032521	Sangervirae	Phixviricota	Malgrandaviricetes	Petitvirales	Microviridae			Overlap (VC_188/VC_189)
BK032681	Sangervirae	Phixviricota	Malgrandaviricetes	Petitvirales	Microviridae		preVC_179	Clustered	VC_179_0	21	0.9557	1	1.43053	0.9557	1	0	0	0	0	0	0
BK033509	Sangervirae	Phixviricota	Malgrandaviricetes	Petitvirales	Microviridae		preVC_185	Clustered	VC_185_0	29	0.9718	1	0.949086	0.9718	1	0	0	0	0	0	0
BK033754	Sangervirae	Phixviricota	Malgrandaviricetes	Petitvirales	Microviridae		preVC_187	Clustered	VC_187_0	23	0.8461	1	0.829629	0.8461	1	0	0	0	0	0	0
BK034115	Sangervirae	Phixviricota	Malgrandaviricetes	Petitvirales	Microviridae		preVC_201	Clustered	VC_201_0	7	0.5481	1	2.39175	0.5481	1	0	0	0	0	0	0
BK034563	Sangervirae	Phixviricota	Malgrandaviricetes	Petitvirales	Microviridae		preVC_183	Clustered	VC_183_0	7	0.6944	1	0.706116	0.6944	1	0	0	0	0	0	0
BK035622	Sangervirae	Phixviricota	Malgrandaviricetes	Petitvirales	Microviridae		preVC_201	Clustered	VC_201_0	7	0.5481	1	2.39175	0.5481	1	0	0	0	0	0	0
BK035639	Sangervirae	Phixviricota	Malgrandaviricetes	Petitvirales	Microviridae		preVC_201	Clustered	VC_201_0	7	0.5481	1	2.39175	0.5481	1	0	0	0	0	0	0
BK036644	Sangervirae	Phixviricota	Malgrandaviricetes	Petitvirales	Microviridae		preVC_180	Clustered	VC_180_0	30	0.9689	1	0.525513	0.9689	1	0	0	0	0	0	0
BK036822	Sangervirae	Phixviricota	Malgrandaviricetes	Petitvirales	Microviridae		preVC_185	Clustered	VC_185_0	29	0.9718	1	0.949086	0.9718	1	0	0	0	0	0	0
BK037027	Sangervirae	Phixviricota	Malgrandaviricetes	Petitvirales	Microviridae		preVC_185	Clustered	VC_185_0	29	0.9718	1	0.949086	0.9718	1	0	0	0	0	0	0
BK037496	Sangervirae	Phixviricota	Malgrandaviricetes	Petitvirales	Microviridae		preVC_180	Clustered	VC_180_0	30	0.9689	1	0.525513	0.9689	1	0	0	0	0	0	0
BK037529	Sangervirae	Phixviricota	Malgrandaviricetes	Petitvirales	Microviridae		preVC_186	Clustered	VC_186_0	21	1	0	1.57463	0	1	0	0	0	0	0	0
BK039333	Sangervirae	Phixviricota	Malgrandaviricetes	Petitvirales	Microviridae		preVC_187	Clustered	VC_187_0	23	0.8461	1	0.829629	0.8461	1	0	0	0	0	0	0
BK039557	Sangervirae	Phixviricota	Malgrandaviricetes	Petitvirales	Microviridae		preVC_201	Clustered	VC_201_0	7	0.5481	1	2.39175	0.5481	1	0	0	0	0	0	0
BK040637	Sangervirae	Phixviricota	Malgrandaviricetes	Petitvirales	Microviridae		preVC_186	Clustered	VC_186_0	21	1	0	1.57463	0	1	0	0	0	0	0	0
BK041121	Sangervirae	Phixviricota	Malgrandaviricetes	Petitvirales	Microviridae		preVC_187	Clustered	VC_187_0	23	0.8461	1	0.829629	0.8461	1	0	0	0	0	0	0
BK042431	Sangervirae	Phixviricota	Malgrandaviricetes	Petitvirales	Microviridae		preVC_201	Clustered	VC_201_0	7	0.5481	1	2.39175	0.5481	1	0	0	0	0	0	0
BK042487	Sangervirae	Phixviricota	Malgrandaviricetes	Petitvirales	Microviridae		preVC_187	Clustered	VC_187_0	23	0.8461	1	0.829629	0.8461	1	0	0	0	0	0	0
BK043271	Sangervirae	Phixviricota	Malgrandaviricetes	Petitvirales	Microviridae		preVC_195	Clustered	VC_195_0	22	0.9826	1	2.07645	0.9826	1	0	0	0	0	0	0
BK043591	Sangervirae	Phixviricota	Malgrandaviricetes	Petitvirales	Microviridae		preVC_187	Clustered	VC_187_0	23	0.8461	1	0.829629	0.8461	1	0	0	0	0	0	0
BK043851	Sangervirae	Phixviricota	Malgrandaviricetes	Petitvirales	Microviridae		preVC_186	Clustered	VC_186_0	21	1	0	1.57463	0	1	0	0	0	0	0	0
BK044091	Sangervirae	Phixviricota	Malgrandaviricetes	Petitvirales	Microviridae		preVC_195	Clustered	VC_195_0	22	0.9826	1	2.07645	0.9826	1	0	0	0	0	0	0
BK044315	Sangervirae	Phixviricota	Malgrandaviricetes	Petitvirales	Microviridae		preVC_185	Clustered	VC_185_0	29	0.9718	1	0.949086	0.9718	1	0	0	0	0	0	0
BK044708	Sangervirae	Phixviricota	Malgrandaviricetes	Petitvirales	Microviridae		preVC_180	Clustered	VC_180_0	30	0.9689	1	0.525513	0.9689	1	0	0	0	0	0	0
BK044743	Sangervirae	Phixviricota	Malgrandaviricetes	Petitvirales	Microviridae		preVC_196	Clustered	VC_196_0	21	1	0	0.492624	0	1	0	0	0	0	0	0
BK044759	Sangervirae	Phixviricota	Malgrandaviricetes	Petitvirales	Microviridae		preVC_183	Clustered	VC_183_0	7	0.6944	1	0.706116	0.6944	1	0	0	0	0	0	0
BK044982	Sangervirae	Phixviricota	Malgrandaviricetes	Petitvirales	Microviridae		preVC_180	Clustered	VC_180_0	30	0.9689	1	0.525513	0.9689	1	0	0	0	0	0	0
BK045108	Sangervirae	Phixviricota	Malgrandaviricetes	Petitvirales	Microviridae		preVC_196	Clustered	VC_196_0	21	1	0	0.492624	0	1	0	0	0	0	0	0
BK045270	Sangervirae	Phixviricota	Malgrandaviricetes	Petitvirales	Microviridae		preVC_186	Clustered	VC_186_0	21	1	0	1.57463	0	1	0	0	0	0	0	0
BK045797	Sangervirae	Phixviricota	Malgrandaviricetes	Petitvirales	Microviridae		preVC_185	Clustered	VC_185_0	29	0.9718	1	0.949086	0.9718	1	0	0	0	0	0	0
BK045824	Sangervirae	Phixviricota	Malgrandaviricetes	Petitvirales	Microviridae		preVC_180	Clustered	VC_180_0	30	0.9689	1	0.525513	0.9689	1	0	0	0	0	0	0
BK046269	Sangervirae	Phixviricota	Malgrandaviricetes	Petitvirales	Microviridae		preVC_179	Clustered	VC_179_0	21	0.9557	1	1.43053	0.9557	1	0	0	0	0	0	0
BK046302	Sangervirae	Phixviricota	Malgrandaviricetes	Petitvirales	Microviridae		preVC_186	Clustered	VC_186_0	21	1	0	1.57463	0	1	0	0	0	0	0	0
BK046375	Sangervirae	Phixviricota	Malgrandaviricetes	Petitvirales	Microviridae		preVC_195	Clustered	VC_195_0	22	0.9826	1	2.07645	0.9826	1	0	0	0	0	0	0
BK046696	Sangervirae	Phixviricota	Malgrandaviricetes	Petitvirales	Microviridae		preVC_205	Clustered	VC_205_0	7	1	0	0	0	1	0	0	0	0	0	0
BK047145	Sangervirae	Phixviricota	Malgrandaviricetes	Petitvirales	Microviridae		preVC_185	Clustered	VC_185_0	29	0.9718	1	0.949086	0.9718	1	0	0	0	0	0	0
BK047235	Heunggongvirae	Uroviricota	Caudoviricetes				preVC_206	Clustered	VC_206_0	4	0.9828	0.986078	4.50827	0.9691	1	0	0	0	0	0	0
BK047492	Sangervirae	Phixviricota	Malgrandaviricetes	Petitvirales	Microviridae		preVC_202	Clustered	VC_202_0	10	0.7131	1	1.34852	0.7131	1	0	0	0	0	0	0
BK047525	Heunggongvirae	Uroviricota	Caudoviricetes				preVC_206	Clustered	VC_206_0	4	0.9828	0.986078	4.50827	0.9691	1	0	0	0	0	0	0
BK047553	Sangervirae	Phixviricota	Malgrandaviricetes	Petitvirales	Microviridae		preVC_186	Clustered	VC_186_0	21	1	0	1.57463	0	1	0	0	0	0	0	0
BK047602	Sangervirae	Phixviricota	Malgrandaviricetes	Petitvirales	Microviridae		preVC_186	Clustered	VC_186_0	21	1	0	1.57463	0	1	0	0	0	0	0	0
BK047662	Heunggongvirae	Uroviricota	Caudoviricetes				preVC_206	Clustered	VC_206_0	4	0.9828	0.986078	4.50827	0.9691	1	0	0	0	0	0	0
BK047774	Sangervirae	Phixviricota	Malgrandaviricetes	Petitvirales	Microviridae		preVC_180	Clustered	VC_180_0	30	0.9689	1	0.525513	0.9689	1	0	0	0	0	0	0
BK048206	Sangervirae	Phixviricota	Malgrandaviricetes	Petitvirales	Microviridae			Overlap (VC_183/VC_184)
BK048433	Sangervirae	Phixviricota	Malgrandaviricetes	Petitvirales	Microviridae		preVC_186	Clustered	VC_186_0	21	1	0	1.57463	0	1	0	0	0	0	0	0
BK048788	Sangervirae	Phixviricota	Malgrandaviricetes	Petitvirales	Microviridae		preVC_180	Clustered	VC_180_0	30	0.9689	1	0.525513	0.9689	1	0	0	0	0	0	0
BK049141	Sangervirae	Phixviricota	Malgrandaviricetes	Petitvirales	Microviridae		preVC_186	Clustered	VC_186_0	21	1	0	1.57463	0	1	0	0	0	0	0	0
BK049469	Sangervirae	Phixviricota	Malgrandaviricetes	Petitvirales	Microviridae		preVC_185	Clustered	VC_185_0	29	0.9718	1	0.949086	0.9718	1	0	0	0	0	0	0
BK050119	Sangervirae	Phixviricota	Malgrandaviricetes	Petitvirales	Microviridae		preVC_185	Clustered	VC_185_0	29	0.9718	1	0.949086	0.9718	1	0	0	0	0	0	0
BK050581	Sangervirae	Phixviricota	Malgrandaviricetes	Petitvirales	Microviridae		preVC_186	Clustered	VC_186_0	21	1	0	1.57463	0	1	0	0	0	0	0	0
BK050916	Sangervirae	Phixviricota	Malgrandaviricetes	Petitvirales	Microviridae		preVC_195	Clustered	VC_195_0	22	0.9826	1	2.07645	0.9826	1	0	0	0	0	0	0
BK051360	Sangervirae	Phixviricota	Malgrandaviricetes	Petitvirales	Microviridae		preVC_186	Clustered	VC_186_0	21	1	0	1.57463	0	1	0	0	0	0	0	0
BK051405	Sangervirae	Phixviricota	Malgrandaviricetes	Petitvirales	Microviridae		preVC_195	Clustered	VC_195_0	22	0.9826	1	2.07645	0.9826	1	0	0	0	0	0	0
BK051554	Sangervirae	Phixviricota	Malgrandaviricetes	Petitvirales	Microviridae		preVC_187	Clustered	VC_187_0	23	0.8461	1	0.829629	0.8461	1	0	0	0	0	0	0
BK051778	Sangervirae	Phixviricota	Malgrandaviricetes	Petitvirales	Microviridae			Overlap (VC_183/VC_184)
BK051961	Sangervirae	Phixviricota	Malgrandaviricetes	Petitvirales	Microviridae		preVC_185	Clustered	VC_185_0	29	0.9718	1	0.949086	0.9718	1	0	0	0	0	0	0
BK052391	Sangervirae	Phixviricota	Malgrandaviricetes	Petitvirales	Microviridae		preVC_187	Clustered	VC_187_0	23	0.8461	1	0.829629	0.8461	1	0	0	0	0	0	0
BK052739	Sangervirae	Phixviricota	Malgrandaviricetes	Petitvirales	Microviridae		preVC_186	Clustered	VC_186_0	21	1	0	1.57463	0	1	0	0	0	0	0	0
BK053149	Sangervirae	Phixviricota	Malgrandaviricetes	Petitvirales	Microviridae		preVC_179	Clustered	VC_179_0	21	0.9557	1	1.43053	0.9557	1	0	0	0	0	0	0
BK053547	Sangervirae	Phixviricota	Malgrandaviricetes	Petitvirales	Microviridae		preVC_196	Clustered	VC_196_0	21	1	0	0.492624	0	1	0	0	0	0	0	0
BK053788	Sangervirae	Phixviricota	Malgrandaviricetes	Petitvirales	Microviridae		preVC_187	Clustered	VC_187_0	23	0.8461	1	0.829629	0.8461	1	0	0	0	0	0	0
BK054598	Heunggongvirae	Uroviricota	Caudoviricetes				preVC_197	Clustered	VC_197_0	5	1	0	3.84187	0	1	0	0	0	0	0	0
BK054653	Sangervirae	Phixviricota	Malgrandaviricetes	Petitvirales	Microviridae		preVC_185	Clustered	VC_185_0	29	0.9718	1	0.949086	0.9718	1	0	0	0	0	0	0
BK054995	Sangervirae	Phixviricota	Malgrandaviricetes	Petitvirales	Microviridae		preVC_195	Clustered	VC_195_0	22	0.9826	1	2.07645	0.9826	1	0	0	0	0	0	0
BK055055	Sangervirae	Phixviricota	Malgrandaviricetes	Petitvirales	Microviridae		preVC_195	Clustered	VC_195_0	22	0.9826	1	2.07645	0.9826	1	0	0	0	0	0	0
BK055482	Sangervirae	Phixviricota	Malgrandaviricetes	Petitvirales	Microviridae		preVC_185	Clustered	VC_185_0	29	0.9718	1	0.949086	0.9718	1	0	0	0	0	0	0
BK055548	Sangervirae	Phixviricota	Malgrandaviricetes	Petitvirales	Microviridae		preVC_195	Clustered	VC_195_0	22	0.9826	1	2.07645	0.9826	1	0	0	0	0	0	0
BK055691	Sangervirae	Phixviricota	Malgrandaviricetes	Petitvirales	Microviridae		preVC_179	Clustered	VC_179_0	21	0.9557	1	1.43053	0.9557	1	0	0	0	0	0	0
BK056108	Sangervirae	Phixviricota	Malgrandaviricetes	Petitvirales	Microviridae		preVC_195	Clustered	VC_195_0	22	0.9826	1	2.07645	0.9826	1	0	0	0	0	0	0
BK056329	Sangervirae	Phixviricota	Malgrandaviricetes	Petitvirales	Microviridae		preVC_185	Clustered	VC_185_0	29	0.9718	1	0.949086	0.9718	1	0	0	0	0	0	0
BK056568	Sangervirae	Phixviricota	Malgrandaviricetes	Petitvirales	Microviridae		preVC_185	Clustered	VC_185_0	29	0.9718	1	0.949086	0.9718	1	0	0	0	0	0	0
BK057290	Sangervirae	Phixviricota	Malgrandaviricetes	Petitvirales	Microviridae		preVC_195	Clustered	VC_195_0	22	0.9826	1	2.07645	0.9826	1	0	0	0	0	0	0
BK057589	Sangervirae	Phixviricota	Malgrandaviricetes	Petitvirales	Microviridae		preVC_196	Clustered	VC_196_0	21	1	0	0.492624	0	1	0	0	0	0	0	0
BK057619	Sangervirae	Phixviricota	Malgrandaviricetes	Petitvirales	Microviridae		preVC_196	Clustered	VC_196_0	21	1	0	0.492624	0	1	0	0	0	0	0	0
BK057813	Sangervirae	Phixviricota	Malgrandaviricetes	Petitvirales	Microviridae		preVC_187	Clustered	VC_187_0	23	0.8461	1	0.829629	0.8461	1	0	0	0	0	0	0
BK057814	Sangervirae	Phixviricota	Malgrandaviricetes	Petitvirales	Microviridae		preVC_186	Clustered	VC_186_0	21	1	0	1.57463	0	1	0	0	0	0	0	0
BK058019	Sangervirae	Phixviricota	Malgrandaviricetes	Petitvirales	Microviridae		preVC_201	Clustered	VC_201_0	7	0.5481	1	2.39175	0.5481	1	0	0	0	0	0	0
BK058653	Sangervirae	Phixviricota	Malgrandaviricetes	Petitvirales	Microviridae		preVC_186	Clustered	VC_186_0	21	1	0	1.57463	0	1	0	0	0	0	0	0
BK058720	Sangervirae	Phixviricota	Malgrandaviricetes	Petitvirales	Microviridae		preVC_180	Clustered	VC_180_0	30	0.9689	1	0.525513	0.9689	1	0	0	0	0	0	0
BK058866	Heunggongvirae	Uroviricota	Caudoviricetes				preVC_197	Clustered	VC_197_0	5	1	0	3.84187	0	1	0	0	0	0	0	0
KC131022	Sangervirae	Phixviricota	Malgrandaviricetes	Petitvirales	Microviridae		preVC_319	Clustered	VC_319_0	21	0.8981	1	1.69241	0.8981	1	0	0	0	0	0	0
KC131023	Sangervirae	Phixviricota	Malgrandaviricetes	Petitvirales	Microviridae			Overlap (VC_191/VC_272)
KC131024	Sangervirae	Phixviricota	Malgrandaviricetes	Petitvirales	Microviridae			Overlap (VC_271/VC_272/VC_322)
KC131025	Sangervirae	Phixviricota	Malgrandaviricetes	Petitvirales	Microviridae		preVC_190	Clustered	VC_190_0	43	0.3968	1	1.87017	0.3968	1	1	1	1	1	1	1
KM589498	Sangervirae	Phixviricota	Malgrandaviricetes	Petitvirales	Microviridae		preVC_373	Clustered	VC_373_0	2	0.1102	0.919025	0	0.1013	1	0	0	0	0	0	0
KM589508	Sangervirae	Phixviricota	Malgrandaviricetes	Petitvirales	Microviridae			Overlap (VC_191/VC_272)
KM589511	Sangervirae	Phixviricota	Malgrandaviricetes	Petitvirales	Microviridae		preVC_319	Clustered	VC_319_0	21	0.8981	1	1.69241	0.8981	1	0	0	0	0	0	0
KP087936	Sangervirae	Phixviricota	Malgrandaviricetes	Petitvirales	Microviridae		preVC_190	Clustered	VC_190_0	43	0.3968	1	1.87017	0.3968	1	1	1	1	1	1	1
KP087939	Sangervirae	Phixviricota	Malgrandaviricetes	Petitvirales	Microviridae		preVC_190	Clustered	VC_190_0	43	0.3968	1	1.87017	0.3968	1	1	1	1	1	1	1
KP087941	Sangervirae	Phixviricota	Malgrandaviricetes	Petitvirales	Microviridae			Overlap (VC_191/VC_272)
KP087944	Sangervirae	Phixviricota	Malgrandaviricetes	Petitvirales	Microviridae		preVC_190	Clustered	VC_190_0	43	0.3968	1	1.87017	0.3968	1	1	1	1	1	1	1
KP087945	Sangervirae	Phixviricota	Malgrandaviricetes	Petitvirales	Microviridae		preVC_190	Clustered	VC_190_0	43	0.3968	1	1.87017	0.3968	1	1	1	1	1	1	1
KP087946	Sangervirae	Phixviricota	Malgrandaviricetes	Petitvirales	Microviridae		preVC_190	Clustered	VC_190_0	43	0.3968	1	1.87017	0.3968	1	1	1	1	1	1	1
KP087949	Sangervirae	Phixviricota	Malgrandaviricetes	Petitvirales	Microviridae			Overlap (VC_191/VC_272)
KP087952	Sangervirae	Phixviricota	Malgrandaviricetes	Petitvirales	Microviridae		preVC_190	Clustered	VC_190_0	43	0.3968	1	1.87017	0.3968	1	1	1	1	1	1	1
KP087954	Sangervirae	Phixviricota	Malgrandaviricetes	Petitvirales	Microviridae		preVC_190	Clustered	VC_190_0	43	0.3968	1	1.87017	0.3968	1	1	1	1	1	1	1
KP823395	Sangervirae	Phixviricota	Malgrandaviricetes	Petitvirales	Microviridae		preVC_319	Clustered	VC_319_0	21	0.8981	1	1.69241	0.8981	1	0	0	0	0	0	0
KP823396	Sangervirae	Phixviricota	Malgrandaviricetes	Petitvirales	Microviridae		preVC_319	Clustered	VC_319_0	21	0.8981	1	1.69241	0.8981	1	0	0	0	0	0	0
KT264788	Sangervirae	Phixviricota	Malgrandaviricetes	Petitvirales	Microviridae		preVC_179	Clustered	VC_179_0	21	0.9557	1	1.43053	0.9557	1	0	0	0	0	0	0
KT264789	Sangervirae	Phixviricota	Malgrandaviricetes	Petitvirales	Microviridae		preVC_179	Clustered	VC_179_0	21	0.9557	1	1.43053	0.9557	1	0	0	0	0	0	0
KT264810	Sangervirae	Phixviricota	Malgrandaviricetes	Petitvirales	Microviridae			Overlap (VC_271/VC_272/VC_322)
KT264818	Sangervirae	Phixviricota	Malgrandaviricetes	Petitvirales	Microviridae		preVC_196	Clustered	VC_196_0	21	1	0	0.492624	0	1	0	0	0	0	0	0
KT264829	Sangervirae	Phixviricota	Malgrandaviricetes	Petitvirales	Microviridae		preVC_180	Clustered	VC_180_0	30	0.9689	1	0.525513	0.9689	1	0	0	0	0	0	0
KX259468	Sangervirae	Phixviricota	Malgrandaviricetes	Petitvirales	Microviridae		preVC_375	Clustered	VC_375_0	12	1	0	0	0	1	0	0	0	0	0	0
KX513867	Sangervirae	Phixviricota	Malgrandaviricetes	Petitvirales	Microviridae		preVC_196	Clustered	VC_196_0	21	1	0	0.492624	0	1	0	0	0	0	0	0
KX513869	Sangervirae	Phixviricota	Malgrandaviricetes	Petitvirales	Microviridae		preVC_180	Clustered	VC_180_0	30	0.9689	1	0.525513	0.9689	1	0	0	0	0	0	0
KX513872	Sangervirae	Phixviricota	Malgrandaviricetes	Petitvirales	Microviridae		preVC_196	Clustered	VC_196_0	21	1	0	0.492624	0	1	0	0	0	0	0	0
MG945243	Sangervirae	Phixviricota	Malgrandaviricetes	Petitvirales	Microviridae			Outlier
MG945313	Sangervirae	Phixviricota	Malgrandaviricetes	Petitvirales	Microviridae			Overlap (VC_191/VC_272)
MG945322	Sangervirae	Phixviricota	Malgrandaviricetes	Petitvirales	Microviridae			Overlap (VC_191/VC_272)
MG945488	Sangervirae	Phixviricota	Malgrandaviricetes	Petitvirales	Microviridae		preVC_187	Clustered	VC_187_0	23	0.8461	1	0.829629	0.8461	1	0	0	0	0	0	0
MG945560	Sangervirae	Phixviricota	Malgrandaviricetes	Petitvirales	Microviridae		preVC_180	Clustered	VC_180_0	30	0.9689	1	0.525513	0.9689	1	0	0	0	0	0	0
MG945572	Sangervirae	Phixviricota	Malgrandaviricetes	Petitvirales	Microviridae		preVC_187	Clustered	VC_187_0	23	0.8461	1	0.829629	0.8461	1	0	0	0	0	0	0
MG945573	Sangervirae	Phixviricota	Malgrandaviricetes	Petitvirales	Microviridae		preVC_196	Clustered	VC_196_0	21	1	0	0.492624	0	1	0	0	0	0	0	0
MG945759	Sangervirae	Phixviricota	Malgrandaviricetes	Petitvirales	Microviridae		preVC_196	Clustered	VC_196_0	21	1	0	0.492624	0	1	0	0	0	0	0	0
MG945760	Sangervirae	Phixviricota	Malgrandaviricetes	Petitvirales	Microviridae		preVC_196	Clustered	VC_196_0	21	1	0	0.492624	0	1	0	0	0	0	0	0
MG945811	Sangervirae	Phixviricota	Malgrandaviricetes	Petitvirales	Microviridae		preVC_196	Clustered	VC_196_0	21	1	0	0.492624	0	1	0	0	0	0	0	0
MG945894	Sangervirae	Phixviricota	Malgrandaviricetes	Petitvirales	Microviridae		preVC_185	Clustered	VC_185_0	29	0.9718	1	0.949086	0.9718	1	0	0	0	0	0	0
MH510271	Sangervirae	Phixviricota	Malgrandaviricetes	Petitvirales	Microviridae		preVC_190	Clustered	VC_190_0	43	0.3968	1	1.87017	0.3968	1	1	1	1	1	1	1
MH510273	Sangervirae	Phixviricota	Malgrandaviricetes	Petitvirales	Microviridae			Outlier
MH572282	Sangervirae	Phixviricota	Malgrandaviricetes	Petitvirales	Microviridae			Overlap (VC_191/VC_272)
MH572299	Sangervirae	Phixviricota	Malgrandaviricetes	Petitvirales	Microviridae			Overlap (VC_191/VC_321)
MH572319	Sangervirae	Phixviricota	Malgrandaviricetes	Petitvirales	Microviridae		preVC_190	Clustered	VC_190_0	43	0.3968	1	1.87017	0.3968	1	1	1	1	1	1	1
MH572320	Sangervirae	Phixviricota	Malgrandaviricetes	Petitvirales	Microviridae			Overlap (VC_271/VC_272)
MH572321	Sangervirae	Phixviricota	Malgrandaviricetes	Petitvirales	Microviridae			Overlap (VC_271/VC_272)
MH572325	Sangervirae	Phixviricota	Malgrandaviricetes	Petitvirales	Microviridae			Overlap (VC_191/VC_272)
MH572328	Sangervirae	Phixviricota	Malgrandaviricetes	Petitvirales	Microviridae			Overlap (VC_191/VC_272)
MH572350	Sangervirae	Phixviricota	Malgrandaviricetes	Petitvirales	Microviridae			Overlap (VC_191/VC_272)
MH572394	Sangervirae	Phixviricota	Malgrandaviricetes	Petitvirales	Microviridae			Overlap (VC_271/VC_272)
MH572395	Sangervirae	Phixviricota	Malgrandaviricetes	Petitvirales	Microviridae			Overlap (VC_271/VC_272)
MH572417	Sangervirae	Phixviricota	Malgrandaviricetes	Petitvirales	Microviridae			Overlap (VC_321/VC_322)
MH572428	Sangervirae	Phixviricota	Malgrandaviricetes	Petitvirales	Microviridae		preVC_319	Clustered	VC_319_0	21	0.8981	1	1.69241	0.8981	1	0	0	0	0	0	0
MH572444	Sangervirae	Phixviricota	Malgrandaviricetes	Petitvirales	Microviridae		preVC_190	Clustered	VC_190_0	43	0.3968	1	1.87017	0.3968	1	1	1	1	1	1	1
MH616807	Sangervirae	Phixviricota	Malgrandaviricetes	Petitvirales	Microviridae			Overlap (VC_191/VC_321)
MH616876	Sangervirae	Phixviricota	Malgrandaviricetes	Petitvirales	Microviridae			Overlap (VC_191/VC_272)
MH616974	Sangervirae	Phixviricota	Malgrandaviricetes	Petitvirales	Microviridae		preVC_190	Clustered	VC_190_0	43	0.3968	1	1.87017	0.3968	1	1	1	1	1	1	1
MH616998	Sangervirae	Phixviricota	Malgrandaviricetes	Petitvirales	Microviridae			Overlap (VC_191/VC_321)
MH617013	Sangervirae	Phixviricota	Malgrandaviricetes	Petitvirales	Microviridae		preVC_383	Clustered	VC_383_0	2	0.0557	0.931579	0	0.0519	1	0	0	0	0	0	0
MH617027	Sangervirae	Phixviricota	Malgrandaviricetes	Petitvirales	Microviridae		preVC_384	Clustered	VC_384_0	38	0.7152	1	1.42943	0.7152	1	0	0	0	0	0	0
MH617030	Sangervirae	Phixviricota	Malgrandaviricetes	Petitvirales	Microviridae		preVC_384	Clustered	VC_384_0	38	0.7152	1	1.42943	0.7152	1	0	0	0	0	0	0
MH617032	Sangervirae	Phixviricota	Malgrandaviricetes	Petitvirales	Microviridae		preVC_384	Clustered	VC_384_0	38	0.7152	1	1.42943	0.7152	1	0	0	0	0	0	0
MH617035	Sangervirae	Phixviricota	Malgrandaviricetes	Petitvirales	Microviridae		preVC_384	Clustered	VC_384_0	38	0.7152	1	1.42943	0.7152	1	0	0	0	0	0	0
MH617047	Sangervirae	Phixviricota	Malgrandaviricetes	Petitvirales	Microviridae			Overlap (VC_385/VC_386)
MH617049	Sangervirae	Phixviricota	Malgrandaviricetes	Petitvirales	Microviridae		preVC_190	Clustered	VC_190_0	43	0.3968	1	1.87017	0.3968	1	1	1	1	1	1	1
MH617058	Sangervirae	Phixviricota	Malgrandaviricetes	Petitvirales	Microviridae		preVC_384	Clustered	VC_384_0	38	0.7152	1	1.42943	0.7152	1	0	0	0	0	0	0
MH617064	Sangervirae	Phixviricota	Malgrandaviricetes	Petitvirales	Microviridae		preVC_384	Clustered	VC_384_0	38	0.7152	1	1.42943	0.7152	1	0	0	0	0	0	0
MH617085	Sangervirae	Phixviricota	Malgrandaviricetes	Petitvirales	Microviridae		preVC_384	Clustered	VC_384_0	38	0.7152	1	1.42943	0.7152	1	0	0	0	0	0	0
MH617096	Sangervirae	Phixviricota	Malgrandaviricetes	Petitvirales	Microviridae		preVC_384	Clustered	VC_384_0	38	0.7152	1	1.42943	0.7152	1	0	0	0	0	0	0
MH617122	Sangervirae	Phixviricota	Malgrandaviricetes	Petitvirales	Microviridae		preVC_384	Clustered	VC_384_0	38	0.7152	1	1.42943	0.7152	1	0	0	0	0	0	0
MH617125	Sangervirae	Phixviricota	Malgrandaviricetes	Petitvirales	Microviridae			Overlap (VC_385/VC_386)
MH617128	Sangervirae	Phixviricota	Malgrandaviricetes	Petitvirales	Microviridae		preVC_384	Clustered	VC_384_0	38	0.7152	1	1.42943	0.7152	1	0	0	0	0	0	0
MH617129	Sangervirae	Phixviricota	Malgrandaviricetes	Petitvirales	Microviridae		preVC_384	Clustered	VC_384_0	38	0.7152	1	1.42943	0.7152	1	0	0	0	0	0	0
MH617178	Sangervirae	Phixviricota	Malgrandaviricetes	Petitvirales	Microviridae		preVC_384	Clustered	VC_384_0	38	0.7152	1	1.42943	0.7152	1	0	0	0	0	0	0
MH617187	Sangervirae	Phixviricota	Malgrandaviricetes	Petitvirales	Microviridae		preVC_384	Clustered	VC_384_0	38	0.7152	1	1.42943	0.7152	1	0	0	0	0	0	0
MH617194	Sangervirae	Phixviricota	Malgrandaviricetes	Petitvirales	Microviridae			Overlap (VC_385/VC_386)
MH617195	Sangervirae	Phixviricota	Malgrandaviricetes	Petitvirales	Microviridae			Overlap (VC_385/VC_386)
MH617202	Sangervirae	Phixviricota	Malgrandaviricetes	Petitvirales	Microviridae		preVC_384	Clustered	VC_384_0	38	0.7152	1	1.42943	0.7152	1	0	0	0	0	0	0
MH617206	Sangervirae	Phixviricota	Malgrandaviricetes	Petitvirales	Microviridae		preVC_384	Clustered	VC_384_0	38	0.7152	1	1.42943	0.7152	1	0	0	0	0	0	0
MH617249	Sangervirae	Phixviricota	Malgrandaviricetes	Petitvirales	Microviridae			Overlap (VC_191/VC_272)
MH617314	Sangervirae	Phixviricota	Malgrandaviricetes	Petitvirales	Microviridae		preVC_384	Clustered	VC_384_0	38	0.7152	1	1.42943	0.7152	1	0	0	0	0	0	0
MH617319	Sangervirae	Phixviricota	Malgrandaviricetes	Petitvirales	Microviridae		preVC_387	Clustered	VC_387_0	3	1	0	1.57735	0	1	0	0	0	0	0	0
MH617325	Sangervirae	Phixviricota	Malgrandaviricetes	Petitvirales	Microviridae			Overlap (VC_385/VC_386)
MH617333	Sangervirae	Phixviricota	Malgrandaviricetes	Petitvirales	Microviridae			Overlap (VC_385/VC_386)
MH617335	Sangervirae	Phixviricota	Malgrandaviricetes	Petitvirales	Microviridae			Overlap (VC_385/VC_386)
MH617339	Sangervirae	Phixviricota	Malgrandaviricetes	Petitvirales	Microviridae		preVC_384	Clustered	VC_384_0	38	0.7152	1	1.42943	0.7152	1	0	0	0	0	0	0
MH617344	Sangervirae	Phixviricota	Malgrandaviricetes	Petitvirales	Microviridae		preVC_190	Clustered	VC_190_0	43	0.3968	1	1.87017	0.3968	1	1	1	1	1	1	1
MH617366	Sangervirae	Phixviricota	Malgrandaviricetes	Petitvirales	Microviridae		preVC_384	Clustered	VC_384_0	38	0.7152	1	1.42943	0.7152	1	0	0	0	0	0	0
MH617367	Sangervirae	Phixviricota	Malgrandaviricetes	Petitvirales	Microviridae			Overlap (VC_191/VC_321)
MH617372	Sangervirae	Phixviricota	Malgrandaviricetes	Petitvirales	Microviridae		preVC_384	Clustered	VC_384_0	38	0.7152	1	1.42943	0.7152	1	0	0	0	0	0	0
MH617410	Sangervirae	Phixviricota	Malgrandaviricetes	Petitvirales	Microviridae		preVC_384	Clustered	VC_384_0	38	0.7152	1	1.42943	0.7152	1	0	0	0	0	0	0
MH617412	Sangervirae	Phixviricota	Malgrandaviricetes	Petitvirales	Microviridae		preVC_384	Clustered	VC_384_0	38	0.7152	1	1.42943	0.7152	1	0	0	0	0	0	0
MH617430	Sangervirae	Phixviricota	Malgrandaviricetes	Petitvirales	Microviridae		preVC_384	Clustered	VC_384_0	38	0.7152	1	1.42943	0.7152	1	0	0	0	0	0	0
MH617439	Sangervirae	Phixviricota	Malgrandaviricetes	Petitvirales	Microviridae			Overlap (VC_191/VC_321)
MH617471	Sangervirae	Phixviricota	Malgrandaviricetes	Petitvirales	Microviridae			Overlap (VC_385/VC_386)
MH617490	Sangervirae	Phixviricota	Malgrandaviricetes	Petitvirales	Microviridae		preVC_384	Clustered	VC_384_0	38	0.7152	1	1.42943	0.7152	1	0	0	0	0	0	0
MH617495	Sangervirae	Phixviricota	Malgrandaviricetes	Petitvirales	Microviridae		preVC_384	Clustered	VC_384_0	38	0.7152	1	1.42943	0.7152	1	0	0	0	0	0	0
MH617532	Sangervirae	Phixviricota	Malgrandaviricetes	Petitvirales	Microviridae		preVC_384	Clustered	VC_384_0	38	0.7152	1	1.42943	0.7152	1	0	0	0	0	0	0
MH617535	Sangervirae	Phixviricota	Malgrandaviricetes	Petitvirales	Microviridae		preVC_384	Clustered	VC_384_0	38	0.7152	1	1.42943	0.7152	1	0	0	0	0	0	0
MH617561	Sangervirae	Phixviricota	Malgrandaviricetes	Petitvirales	Microviridae			Overlap (VC_191/VC_321/VC_322)
MH617573	Sangervirae	Phixviricota	Malgrandaviricetes	Petitvirales	Microviridae			Overlap (VC_385/VC_386)
MH617627	Sangervirae	Phixviricota	Malgrandaviricetes	Petitvirales	Microviridae		preVC_185	Clustered	VC_185_0	29	0.9718	1	0.949086	0.9718	1	0	0	0	0	0	0
MH617640	Sangervirae	Phixviricota	Malgrandaviricetes	Petitvirales	Microviridae		preVC_383	Clustered	VC_383_0	2	0.0557	0.931579	0	0.0519	1	0	0	0	0	0	0
MH617672	Sangervirae	Phixviricota	Malgrandaviricetes	Petitvirales	Microviridae		preVC_384	Clustered	VC_384_0	38	0.7152	1	1.42943	0.7152	1	0	0	0	0	0	0
MH617678	Sangervirae	Phixviricota	Malgrandaviricetes	Petitvirales	Microviridae		preVC_384	Clustered	VC_384_0	38	0.7152	1	1.42943	0.7152	1	0	0	0	0	0	0
MH617695	Sangervirae	Phixviricota	Malgrandaviricetes	Petitvirales	Microviridae		preVC_384	Clustered	VC_384_0	38	0.7152	1	1.42943	0.7152	1	0	0	0	0	0	0
MH617724	Sangervirae	Phixviricota	Malgrandaviricetes	Petitvirales	Microviridae			Overlap (VC_385/VC_386)
MH617731	Sangervirae	Phixviricota	Malgrandaviricetes	Petitvirales	Microviridae			Overlap (VC_270/VC_321)
MH617733	Sangervirae	Phixviricota	Malgrandaviricetes	Petitvirales	Microviridae		preVC_384	Clustered	VC_384_0	38	0.7152	1	1.42943	0.7152	1	0	0	0	0	0	0
MH617738	Sangervirae	Phixviricota	Malgrandaviricetes	Petitvirales	Microviridae		preVC_384	Clustered	VC_384_0	38	0.7152	1	1.42943	0.7152	1	0	0	0	0	0	0
MH617743	Sangervirae	Phixviricota	Malgrandaviricetes	Petitvirales	Microviridae		preVC_384	Clustered	VC_384_0	38	0.7152	1	1.42943	0.7152	1	0	0	0	0	0	0
MH617747	Sangervirae	Phixviricota	Malgrandaviricetes	Petitvirales	Microviridae		preVC_384	Clustered	VC_384_0	38	0.7152	1	1.42943	0.7152	1	0	0	0	0	0	0
MH622915	Sangervirae	Phixviricota	Malgrandaviricetes	Petitvirales	Microviridae			Overlap (VC_385/VC_386)
MH622925	Sangervirae	Phixviricota	Malgrandaviricetes	Petitvirales	Microviridae		preVC_384	Clustered	VC_384_0	38	0.7152	1	1.42943	0.7152	1	0	0	0	0	0	0
MH992190	Sangervirae	Phixviricota	Malgrandaviricetes	Petitvirales	Microviridae		preVC_190	Clustered	VC_190_0	43	0.3968	1	1.87017	0.3968	1	1	1	1	1	1	1
MH992193	Sangervirae	Phixviricota	Malgrandaviricetes	Petitvirales	Microviridae			Overlap (VC_321/VC_383)
MH992210	Sangervirae	Phixviricota	Malgrandaviricetes	Petitvirales	Microviridae			Overlap (VC_191/VC_321)
MK012486	Sangervirae	Phixviricota	Malgrandaviricetes	Petitvirales	Microviridae			Outlier
MK496684	Sangervirae	Phixviricota	Malgrandaviricetes	Petitvirales	Microviridae			Outlier
MK496775	Sangervirae	Phixviricota	Malgrandaviricetes	Petitvirales	Microviridae		preVC_386	Clustered	VC_386_0	2	0.0593	0.923929	1.41421	0.0548	1	0	0	0	0	0	0
MK765561	Sangervirae	Phixviricota	Malgrandaviricetes	Petitvirales	Microviridae			Outlier
MK765563	Sangervirae	Phixviricota	Malgrandaviricetes	Petitvirales	Microviridae		preVC_195	Clustered	VC_195_0	22	0.9826	1	2.07645	0.9826	1	0	0	0	0	0	0
MK765564	Sangervirae	Phixviricota	Malgrandaviricetes	Petitvirales	Microviridae			Outlier
MK765568	Sangervirae	Phixviricota	Malgrandaviricetes	Petitvirales	Microviridae			Outlier
MK765569	Sangervirae	Phixviricota	Malgrandaviricetes	Petitvirales	Microviridae		preVC_384	Clustered	VC_384_0	38	0.7152	1	1.42943	0.7152	1	0	0	0	0	0	0
MK765594	Sangervirae	Phixviricota	Malgrandaviricetes	Petitvirales	Microviridae		preVC_195	Clustered	VC_195_0	22	0.9826	1	2.07645	0.9826	1	0	0	0	0	0	0
MK765638	Sangervirae	Phixviricota	Malgrandaviricetes	Petitvirales	Microviridae		preVC_384	Clustered	VC_384_0	38	0.7152	1	1.42943	0.7152	1	0	0	0	0	0	0
MN582079	Sangervirae	Phixviricota	Malgrandaviricetes	Petitvirales	Microviridae			Overlap (VC_191/VC_322)
MT201798	Sangervirae	Phixviricota	Malgrandaviricetes	Petitvirales	Microviridae		preVC_190	Clustered	VC_190_0	43	0.3968	1	1.87017	0.3968	1	1	1	1	1	1	1
MT201858	Sangervirae	Phixviricota	Malgrandaviricetes	Petitvirales	Microviridae		preVC_320	Clustered/Singleton	VC_320_0	1	0	0	0	0	1	0	0	0	0	0	0
MT202498	Sangervirae	Phixviricota	Malgrandaviricetes	Petitvirales	Microviridae		preVC_375	Clustered	VC_375_0	12	1	0	0	0	1	0	0	0	0	0	0
MT202683	Sangervirae	Phixviricota	Malgrandaviricetes	Petitvirales	Microviridae			Overlap (VC_270/VC_321)
MT202780	Sangervirae	Phixviricota	Malgrandaviricetes	Petitvirales	Microviridae			Overlap (VC_321/VC_383)
MT202975	Sangervirae	Phixviricota	Malgrandaviricetes	Petitvirales	Microviridae		preVC_375	Clustered	VC_375_0	12	1	0	0	0	1	0	0	0	0	0	0
MT203085	Sangervirae	Phixviricota	Malgrandaviricetes	Petitvirales	Microviridae		preVC_190	Clustered	VC_190_0	43	0.3968	1	1.87017	0.3968	1	1	1	1	1	1	1
MT203108	Sangervirae	Phixviricota	Malgrandaviricetes	Petitvirales	Microviridae			Overlap (VC_270/VC_321)
MT203192	Sangervirae	Phixviricota	Malgrandaviricetes	Petitvirales	Microviridae		preVC_190	Clustered	VC_190_0	43	0.3968	1	1.87017	0.3968	1	1	1	1	1	1	1
MT203197	Sangervirae	Phixviricota	Malgrandaviricetes	Petitvirales	Microviridae		preVC_190	Clustered	VC_190_0	43	0.3968	1	1.87017	0.3968	1	1	1	1	1	1	1
MT203421	Sangervirae	Phixviricota	Malgrandaviricetes	Petitvirales	Microviridae			Overlap (VC_191/VC_272)
MT203452	Sangervirae	Phixviricota	Malgrandaviricetes	Petitvirales	Microviridae		preVC_190	Clustered	VC_190_0	43	0.3968	1	1.87017	0.3968	1	1	1	1	1	1	1
MT203517	Sangervirae	Phixviricota	Malgrandaviricetes	Petitvirales	Microviridae			Overlap (VC_191/VC_272)
MT204481	Sangervirae	Phixviricota	Malgrandaviricetes	Petitvirales	Microviridae			Overlap (VC_191/VC_322)
MT205557	Sangervirae	Phixviricota	Malgrandaviricetes	Petitvirales	Microviridae		preVC_190	Clustered	VC_190_0	43	0.3968	1	1.87017	0.3968	1	1	1	1	1	1	1
MT208123	Sangervirae	Phixviricota	Malgrandaviricetes	Petitvirales	Microviridae			Overlap (VC_270/VC_321)
MT208359	Sangervirae	Phixviricota	Malgrandaviricetes	Petitvirales	Microviridae		preVC_190	Clustered	VC_190_0	43	0.3968	1	1.87017	0.3968	1	1	1	1	1	1	1
MT208620	Sangervirae	Phixviricota	Malgrandaviricetes	Petitvirales	Microviridae			Overlap (VC_270/VC_321)
MT208742	Sangervirae	Phixviricota	Malgrandaviricetes	Petitvirales	Microviridae		preVC_375	Clustered	VC_375_0	12	1	0	0	0	1	0	0	0	0	0	0
MT209003	Sangervirae	Phixviricota	Malgrandaviricetes	Petitvirales	Microviridae			Overlap (VC_270/VC_321)
MT209436	Sangervirae	Phixviricota	Malgrandaviricetes	Petitvirales	Microviridae			Overlap (VC_191/VC_322)
MT309950	Sangervirae	Phixviricota	Malgrandaviricetes	Petitvirales	Microviridae			Overlap (VC_321/VC_383)
MT309971	Sangervirae	Phixviricota	Malgrandaviricetes	Petitvirales	Microviridae		preVC_190	Clustered	VC_190_0	43	0.3968	1	1.87017	0.3968	1	1	1	1	1	1	1
MT310004	Sangervirae	Phixviricota	Malgrandaviricetes	Petitvirales	Microviridae		preVC_190	Clustered	VC_190_0	43	0.3968	1	1.87017	0.3968	1	1	1	1	1	1	1
MT310010	Sangervirae	Phixviricota	Malgrandaviricetes	Petitvirales	Microviridae		preVC_375	Clustered	VC_375_0	12	1	0	0	0	1	0	0	0	0	0	0
MT310015	Sangervirae	Phixviricota	Malgrandaviricetes	Petitvirales	Microviridae		preVC_319	Clustered	VC_319_0	21	0.8981	1	1.69241	0.8981	1	0	0	0	0	0	0
MT310032	Sangervirae	Phixviricota	Malgrandaviricetes	Petitvirales	Microviridae			Overlap (VC_270/VC_321)
MT310034	Sangervirae	Phixviricota	Malgrandaviricetes	Petitvirales	Microviridae		preVC_190	Clustered	VC_190_0	43	0.3968	1	1.87017	0.3968	1	1	1	1	1	1	1
MT310060	Sangervirae	Phixviricota	Malgrandaviricetes	Petitvirales	Microviridae		preVC_187	Clustered	VC_187_0	23	0.8461	1	0.829629	0.8461	1	0	0	0	0	0	0
MT310070	Sangervirae	Phixviricota	Malgrandaviricetes	Petitvirales	Microviridae			Overlap (VC_270/VC_321)
MT310072	Sangervirae	Phixviricota	Malgrandaviricetes	Petitvirales	Microviridae		preVC_190	Clustered	VC_190_0	43	0.3968	1	1.87017	0.3968	1	1	1	1	1	1	1
MT310108	Sangervirae	Phixviricota	Malgrandaviricetes	Petitvirales	Microviridae			Overlap (VC_321/VC_383)
MT310115	Sangervirae	Phixviricota	Malgrandaviricetes	Petitvirales	Microviridae		preVC_190	Clustered	VC_190_0	43	0.3968	1	1.87017	0.3968	1	1	1	1	1	1	1
MT310131	Sangervirae	Phixviricota	Malgrandaviricetes	Petitvirales	Microviridae			Overlap (VC_321/VC_383)
MT310134	Sangervirae	Phixviricota	Malgrandaviricetes	Petitvirales	Microviridae		preVC_190	Clustered	VC_190_0	43	0.3968	1	1.87017	0.3968	1	1	1	1	1	1	1
MT310144	Sangervirae	Phixviricota	Malgrandaviricetes	Petitvirales	Microviridae			Overlap (VC_270/VC_321)
MT310148	Sangervirae	Phixviricota	Malgrandaviricetes	Petitvirales	Microviridae			Overlap (VC_191/VC_272)
MT310149	Sangervirae	Phixviricota	Malgrandaviricetes	Petitvirales	Microviridae		preVC_319	Clustered	VC_319_0	21	0.8981	1	1.69241	0.8981	1	0	0	0	0	0	0
MT310154	Sangervirae	Phixviricota	Malgrandaviricetes	Petitvirales	Microviridae		preVC_375	Clustered	VC_375_0	12	1	0	0	0	1	0	0	0	0	0	0
MT310168	Sangervirae	Phixviricota	Malgrandaviricetes	Petitvirales	Microviridae			Overlap (VC_271/VC_272)
MT310258	Sangervirae	Phixviricota	Malgrandaviricetes	Petitvirales	Microviridae			Overlap (VC_270/VC_321)
MT310304	Sangervirae	Phixviricota	Malgrandaviricetes	Petitvirales	Microviridae		preVC_375	Clustered	VC_375_0	12	1	0	0	0	1	0	0	0	0	0	0
MT310307	Sangervirae	Phixviricota	Malgrandaviricetes	Petitvirales	Microviridae		preVC_375	Clustered	VC_375_0	12	1	0	0	0	1	0	0	0	0	0	0
MT310308	Sangervirae	Phixviricota	Malgrandaviricetes	Petitvirales	Microviridae		preVC_375	Clustered	VC_375_0	12	1	0	0	0	1	0	0	0	0	0	0
MT310334	Sangervirae	Phixviricota	Malgrandaviricetes	Petitvirales	Microviridae		preVC_196	Clustered	VC_196_0	21	1	0	0.492624	0	1	0	0	0	0	0	0
MT310340	Sangervirae	Phixviricota	Malgrandaviricetes	Petitvirales	Microviridae		preVC_179	Clustered	VC_179_0	21	0.9557	1	1.43053	0.9557	1	0	0	0	0	0	0
MT310379	Sangervirae	Phixviricota	Malgrandaviricetes	Petitvirales	Microviridae		preVC_187	Clustered	VC_187_0	23	0.8461	1	0.829629	0.8461	1	0	0	0	0	0	0
MT310380	Sangervirae	Phixviricota	Malgrandaviricetes	Petitvirales	Microviridae		preVC_187	Clustered	VC_187_0	23	0.8461	1	0.829629	0.8461	1	0	0	0	0	0	0
MT310392	Sangervirae	Phixviricota	Malgrandaviricetes	Petitvirales	Microviridae		preVC_186	Clustered	VC_186_0	21	1	0	1.57463	0	1	0	0	0	0	0	0
MT310398	Sangervirae	Phixviricota	Malgrandaviricetes	Petitvirales	Microviridae		preVC_185	Clustered	VC_185_0	29	0.9718	1	0.949086	0.9718	1	0	0	0	0	0	0
MT310399	Sangervirae	Phixviricota	Malgrandaviricetes	Petitvirales	Microviridae		preVC_185	Clustered	VC_185_0	29	0.9718	1	0.949086	0.9718	1	0	0	0	0	0	0
MT310401	Sangervirae	Phixviricota	Malgrandaviricetes	Petitvirales	Microviridae		preVC_185	Clustered	VC_185_0	29	0.9718	1	0.949086	0.9718	1	0	0	0	0	0	0
MT310402	Sangervirae	Phixviricota	Malgrandaviricetes	Petitvirales	Microviridae		preVC_185	Clustered	VC_185_0	29	0.9718	1	0.949086	0.9718	1	0	0	0	0	0	0
MW697594	Sangervirae	Phixviricota	Malgrandaviricetes	Petitvirales	Microviridae		preVC_319	Clustered	VC_319_0	21	0.8981	1	1.69241	0.8981	1	0	0	0	0	0	0
MW697616	Sangervirae	Phixviricota	Malgrandaviricetes	Petitvirales	Microviridae		preVC_319	Clustered	VC_319_0	21	0.8981	1	1.69241	0.8981	1	0	0	0	0	0	0
MW697633	Sangervirae	Phixviricota	Malgrandaviricetes	Petitvirales	Microviridae		preVC_190	Clustered	VC_190_0	43	0.3968	1	1.87017	0.3968	1	1	1	1	1	1	1
MW697636	Sangervirae	Phixviricota	Malgrandaviricetes	Petitvirales	Microviridae			Overlap (VC_321/VC_383)
MW697648	Sangervirae	Phixviricota	Malgrandaviricetes	Petitvirales	Microviridae		preVC_190	Clustered	VC_190_0	43	0.3968	1	1.87017	0.3968	1	1	1	1	1	1	1
MW697671	Sangervirae	Phixviricota	Malgrandaviricetes	Petitvirales	Microviridae			Overlap (VC_191/VC_321)
MW697679	Sangervirae	Phixviricota	Malgrandaviricetes	Petitvirales	Microviridae			Overlap (VC_191/VC_321)
MW697681	Sangervirae	Phixviricota	Malgrandaviricetes	Petitvirales	Microviridae			Overlap (VC_191/VC_321)
MW697691	Sangervirae	Phixviricota	Malgrandaviricetes	Petitvirales	Microviridae		preVC_190	Clustered	VC_190_0	43	0.3968	1	1.87017	0.3968	1	1	1	1	1	1	1
MW697696	Sangervirae	Phixviricota	Malgrandaviricetes	Petitvirales	Microviridae		preVC_190	Clustered	VC_190_0	43	0.3968	1	1.87017	0.3968	1	1	1	1	1	1	1
MW697711	Sangervirae	Phixviricota	Malgrandaviricetes	Petitvirales	Microviridae			Overlap (VC_191/VC_321)
MW697737	Sangervirae	Phixviricota	Malgrandaviricetes	Petitvirales	Microviridae		preVC_319	Clustered	VC_319_0	21	0.8981	1	1.69241	0.8981	1	0	0	0	0	0	0
MZ364241	Sangervirae	Phixviricota	Malgrandaviricetes	Petitvirales	Microviridae			Overlap (VC_271/VC_272/VC_322)
MZ364281	Sangervirae	Phixviricota	Malgrandaviricetes	Petitvirales	Microviridae			Overlap (VC_191/VC_272)
NC_027633	Sangervirae	Phixviricota	Malgrandaviricetes	Petitvirales	Microviridae		preVC_373	Clustered	VC_373_0	2	0.1102	0.919025	0	0.1013	1	0	0	0	0	0	0
NC_027642	Sangervirae	Phixviricota	Malgrandaviricetes	Petitvirales	Microviridae			Overlap (VC_191/VC_272)
NC_027645	Sangervirae	Phixviricota	Malgrandaviricetes	Petitvirales	Microviridae		preVC_319	Clustered	VC_319_0	21	0.8981	1	1.69241	0.8981	1	0	0	0	0	0	0
NC_028993	Sangervirae	Phixviricota	Malgrandaviricetes	Petitvirales	Microviridae		preVC_319	Clustered	VC_319_0	21	0.8981	1	1.69241	0.8981	1	0	0	0	0	0	0
NC_028994	Sangervirae	Phixviricota	Malgrandaviricetes	Petitvirales	Microviridae		preVC_319	Clustered	VC_319_0	21	0.8981	1	1.69241	0.8981	1	0	0	0	0	0	0
OM154898	Sangervirae	Phixviricota	Malgrandaviricetes	Petitvirales	Microviridae			Overlap (VC_191/VC_321)
OP376976	Sangervirae	Phixviricota	Malgrandaviricetes	Petitvirales	Microviridae		preVC_190	Clustered	VC_190_0	43	0.3968	1	1.87017	0.3968	1	1	1	1	1	1	1
OP512577	Sangervirae	Phixviricota	Malgrandaviricetes	Petitvirales	Microviridae		preVC_187	Clustered	VC_187_0	23	0.8461	1	0.829629	0.8461	1	0	0	0	0	0	0
OP512584	Sangervirae	Phixviricota	Malgrandaviricetes	Petitvirales	Microviridae		preVC_196	Clustered	VC_196_0	21	1	0	0.492624	0	1	0	0	0	0	0	0
OP512602	Sangervirae	Phixviricota	Malgrandaviricetes	Petitvirales	Microviridae		preVC_179	Clustered	VC_179_0	21	0.9557	1	1.43053	0.9557	1	0	0	0	0	0	0
OP512607	Sangervirae	Phixviricota	Malgrandaviricetes	Petitvirales	Microviridae		preVC_186	Clustered	VC_186_0	21	1	0	1.57463	0	1	0	0	0	0	0	0
OP512610	Sangervirae	Phixviricota	Malgrandaviricetes	Petitvirales	Microviridae		preVC_179	Clustered	VC_179_0	21	0.9557	1	1.43053	0.9557	1	0	0	0	0	0	0
OP512615	Sangervirae	Phixviricota	Malgrandaviricetes	Petitvirales	Microviridae			Outlier
OP549803	Sangervirae	Phixviricota	Malgrandaviricetes	Petitvirales	Microviridae			Overlap (VC_191/VC_321)
OP549805	Sangervirae	Phixviricota	Malgrandaviricetes	Petitvirales	Microviridae			Overlap (VC_191/VC_272)
OP549864	Sangervirae	Phixviricota	Malgrandaviricetes	Petitvirales	Microviridae		preVC_202	Clustered	VC_202_0	10	0.7131	1	1.34852	0.7131	1	0	0	0	0	0	0
OP549865	Sangervirae	Phixviricota	Malgrandaviricetes	Petitvirales	Microviridae		preVC_202	Clustered	VC_202_0	10	0.7131	1	1.34852	0.7131	1	0	0	0	0	0	0
OP549866	Sangervirae	Phixviricota	Malgrandaviricetes	Petitvirales	Microviridae		preVC_202	Clustered	VC_202_0	10	0.7131	1	1.34852	0.7131	1	0	0	0	0	0	0
OP549878	Sangervirae	Phixviricota	Malgrandaviricetes	Petitvirales	Microviridae		preVC_205	Clustered	VC_205_0	7	1	0	0	0	1	0	0	0	0	0	0
OP549879	Sangervirae	Phixviricota	Malgrandaviricetes	Petitvirales	Microviridae		preVC_205	Clustered	VC_205_0	7	1	0	0	0	1	0	0	0	0	0	0
OP971938	Sangervirae	Phixviricota	Malgrandaviricetes	Petitvirales	Microviridae		preVC_196	Clustered	VC_196_0	21	1	0	0.492624	0	1	0	0	0	0	0	0
OQ709382	Sangervirae	Phixviricota	Malgrandaviricetes	Petitvirales	Microviridae		preVC_196	Clustered	VC_196_0	21	1	0	0.492624	0	1	0	0	0	0	0	0
OR349793	Sangervirae	Phixviricota	Malgrandaviricetes	Petitvirales	Microviridae		preVC_319	Clustered	VC_319_0	21	0.8981	1	1.69241	0.8981	1	0	0	0	0	0	0
OR349820	Sangervirae	Phixviricota	Malgrandaviricetes	Petitvirales	Microviridae		preVC_319	Clustered	VC_319_0	21	0.8981	1	1.69241	0.8981	1	0	0	0	0	0	0
OR349919	Sangervirae	Phixviricota	Malgrandaviricetes	Petitvirales	Microviridae		preVC_375	Clustered	VC_375_0	12	1	0	0	0	1	0	0	0	0	0	0
OR349921	Sangervirae	Phixviricota	Malgrandaviricetes	Petitvirales	Microviridae			Overlap (VC_191/VC_322)
OR349923	Sangervirae	Phixviricota	Malgrandaviricetes	Petitvirales	Microviridae			Overlap (VC_191/VC_322)
OR350035	Sangervirae	Phixviricota	Malgrandaviricetes	Petitvirales	Microviridae			Overlap (VC_191/VC_272)
OR350079	Sangervirae	Phixviricota	Malgrandaviricetes	Petitvirales	Microviridae		preVC_319	Clustered	VC_319_0	21	0.8981	1	1.69241	0.8981	1	0	0	0	0	0	0
OR350082	Sangervirae	Phixviricota	Malgrandaviricetes	Petitvirales	Microviridae		preVC_319	Clustered	VC_319_0	21	0.8981	1	1.69241	0.8981	1	0	0	0	0	0	0
OR350108	Sangervirae	Phixviricota	Malgrandaviricetes	Petitvirales	Microviridae		preVC_319	Clustered	VC_319_0	21	0.8981	1	1.69241	0.8981	1	0	0	0	0	0	0
OR350129	Sangervirae	Phixviricota	Malgrandaviricetes	Petitvirales	Microviridae		preVC_319	Clustered	VC_319_0	21	0.8981	1	1.69241	0.8981	1	0	0	0	0	0	0
OR350185	Sangervirae	Phixviricota	Malgrandaviricetes	Petitvirales	Microviridae			Overlap (VC_191/VC_321/VC_322)
OR350189	Sangervirae	Phixviricota	Malgrandaviricetes	Petitvirales	Microviridae			Overlap (VC_191/VC_321)
OX614414	Sangervirae	Phixviricota	Malgrandaviricetes	Petitvirales	Microviridae			Outlier
PP754850	Sangervirae	Phixviricota	Malgrandaviricetes	Petitvirales	Microviridae		preVC_387	Clustered	VC_387_0	3	1	0	1.57735	0	1	0	0	0	0	0	0
NC_002643	Sangervirae	Phixviricota	Malgrandaviricetes	Petitvirales	Microviridae	Bdellomicrovirus		Overlap (VC_270/VC_321)
NC_001998	Sangervirae	Phixviricota	Malgrandaviricetes	Petitvirales	Microviridae	Chlamydiamicrovirus	preVC_190	Clustered	VC_190_0	43	0.3968	1	1.87017	0.3968	1	1	1	1	1	1	1
NC_002180	Sangervirae	Phixviricota	Malgrandaviricetes	Petitvirales	Microviridae	Chlamydiamicrovirus	preVC_190	Clustered	VC_190_0	43	0.3968	1	1.87017	0.3968	1	1	1	1	1	1	1
NC_002194	Sangervirae	Phixviricota	Malgrandaviricetes	Petitvirales	Microviridae	Chlamydiamicrovirus	preVC_190	Clustered	VC_190_0	43	0.3968	1	1.87017	0.3968	1	1	1	1	1	1	1
NC_007461	Sangervirae	Phixviricota	Malgrandaviricetes	Petitvirales	Microviridae	Chlamydiamicrovirus	preVC_190	Clustered	VC_190_0	43	0.3968	1	1.87017	0.3968	1	1	1	1	1	1	1
MK249131	Sangervirae	Phixviricota	Malgrandaviricetes	Petitvirales	Microviridae	Microvirus		Overlap (VC_271/VC_272/VC_322)
MK249149	Sangervirae	Phixviricota	Malgrandaviricetes	Petitvirales	Microviridae	Microvirus		Overlap (VC_191/VC_272)
MK249150	Sangervirae	Phixviricota	Malgrandaviricetes	Petitvirales	Microviridae	Microvirus		Overlap (VC_191/VC_272)
MK249153	Sangervirae	Phixviricota	Malgrandaviricetes	Petitvirales	Microviridae	Microvirus		Overlap (VC_191/VC_272)
MK249196	Sangervirae	Phixviricota	Malgrandaviricetes	Petitvirales	Microviridae	Microvirus		Overlap (VC_191/VC_272)
MK249225	Sangervirae	Phixviricota	Malgrandaviricetes	Petitvirales	Microviridae	Microvirus		Overlap (VC_191/VC_272)
MN311493	Sangervirae	Phixviricota	Malgrandaviricetes	Petitvirales	Microviridae	Microvirus	preVC_384	Clustered	VC_384_0	38	0.7152	1	1.42943	0.7152	1	0	0	0	0	0	0
Brevibacillus~phage~Abouo	Heunggongvirae	Uroviricota	Caudoviricetes	Caudovirales	Myoviridae	Abouovirus	preVC_276	Clustered	VC_276_0	5	0.7659	0.999999	6.10954	0.7659	1	1	1	1	1	1	2
Brevibacillus~phage~Davies	Heunggongvirae	Uroviricota	Caudoviricetes	Caudovirales	Myoviridae	Abouovirus	preVC_276	Clustered	VC_276_0	5	0.7659	0.999999	6.10954	0.7659	1	1	1	1	1	1	2
Lactobacillus~phage~LBR48	Heunggongvirae	Uroviricota	Caudoviricetes	Caudovirales	Myoviridae	Anamdongvirus		Overlap (VC_86/VC_90/VC_399)
Propionibacterium~phage~Anatole	Heunggongvirae	Uroviricota	Caudoviricetes	Caudovirales	Siphoviridae	Anatolevirus	preVC_169	Clustered	VC_169_0	6	0.6793	1	6.67319	0.6793	1	1	1	1	1	1	2
Lactobacillus~phage~A2	Heunggongvirae	Uroviricota	Caudoviricetes	Caudovirales	Siphoviridae	Ashduovirus	preVC_376	Clustered	VC_376_0	9	0.4842	1	7.29097	0.4842	0.9167	1	1	1	1	1	7
Bifidobacterium~phage~BadAargau2	Heunggongvirae	Uroviricota	Caudoviricetes	Caudovirales	Podoviridae	Badaztecvirus		Overlap (VC_77/VC_82)
Bifidobacterium~phage~BadAztec1	Heunggongvirae	Uroviricota	Caudoviricetes	Caudovirales	Podoviridae	Badaztecvirus		Overlap (VC_77/VC_82)
Bdellovibrio~phage~phiMH2K	Sangervirae	Phixviricota	Malgrandaviricetes	Petitvirales	Microviridae	Bdellomicrovirus		Overlap (VC_270/VC_321)
Bacillus~phage~vB_BsuP-Goe1	Heunggongvirae	Uroviricota	Caudoviricetes	Caudovirales	Salasmaviridae	Beecentumtrevirus	preVC_80	Clustered	VC_80_0	7	0.3899	1	2.58442	0.3899	1	1	1	1	1	1	2
Bacillus~virus~B103	Heunggongvirae	Uroviricota	Caudoviricetes	Caudovirales	Salasmaviridae	Beecentumtrevirus	preVC_80	Clustered	VC_80_0	7	0.3899	1	2.58442	0.3899	1	1	1	1	1	1	2
Lactobacillus~phage~BH1	Heunggongvirae	Uroviricota	Caudoviricetes	Caudovirales	Siphoviridae	Behunavirus	preVC_376	Clustered	VC_376_0	9	0.4842	1	7.29097	0.4842	0.9167	1	1	1	1	1	7
Streptococcus~phage~TP-778L	Heunggongvirae	Uroviricota	Caudoviricetes	Caudovirales	Siphoviridae	Brussowvirus	preVC_226	Clustered	VC_226_0	8	0.4403	1	5.35384	0.4403	1	1	1	1	1	1	1
Bacillus~phage~Carmen17	Heunggongvirae	Uroviricota	Caudoviricetes	Caudovirales	Siphoviridae	Carmenvirus	preVC_207	Clustered	VC_207_0	3	0.393	0.996787	2.90499	0.3918	1	1	1	1	1	1	2
Bacillus~phage~Wes44	Heunggongvirae	Uroviricota	Caudoviricetes	Caudovirales	Siphoviridae	Carmenvirus	preVC_207	Clustered	VC_207_0	3	0.393	0.996787	2.90499	0.3918	1	1	1	1	1	1	2
Chlamydia~phage~2	Sangervirae	Phixviricota	Malgrandaviricetes	Petitvirales	Microviridae	Chlamydiamicrovirus	preVC_190	Clustered	VC_190_0	43	0.3968	1	1.87017	0.3968	1	1	1	1	1	1	1
Chlamydia~phage~4	Sangervirae	Phixviricota	Malgrandaviricetes	Petitvirales	Microviridae	Chlamydiamicrovirus	preVC_190	Clustered	VC_190_0	43	0.3968	1	1.87017	0.3968	1	1	1	1	1	1	1
Chlamydia~phage~CPG1	Sangervirae	Phixviricota	Malgrandaviricetes	Petitvirales	Microviridae	Chlamydiamicrovirus	preVC_190	Clustered	VC_190_0	43	0.3968	1	1.87017	0.3968	1	1	1	1	1	1	1
Chlamydia~virus~CPAR39	Sangervirae	Phixviricota	Malgrandaviricetes	Petitvirales	Microviridae	Chlamydiamicrovirus	preVC_190	Clustered	VC_190_0	43	0.3968	1	1.87017	0.3968	1	1	1	1	1	1	1
Lactobacillus~phage~CL1	Heunggongvirae	Uroviricota	Caudoviricetes	Caudovirales	Siphoviridae	Colunavirus		Overlap (VC_282/VC_377)
Lactobacillus~phage~CL2	Heunggongvirae	Uroviricota	Caudoviricetes	Caudovirales	Siphoviridae	Colunavirus		Overlap (VC_282/VC_377)
Lactobacillus~phage~iLp1308	Heunggongvirae	Uroviricota	Caudoviricetes	Caudovirales	Siphoviridae	Colunavirus		Overlap (VC_282/VC_377)
Arthrobacter~phage~Decurro	Heunggongvirae	Uroviricota	Caudoviricetes	Caudovirales	Siphoviridae	Decurrovirus	preVC_167	Clustered	VC_167_0	5	0.817	0.99938	3.99178	0.8165	1	1	1	1	1	1	1
Propionibacterium~phage~G4	Heunggongvirae	Uroviricota	Caudoviricetes	Caudovirales	Siphoviridae	Doucettevirus	preVC_169	Clustered	VC_169_0	6	0.6793	1	6.67319	0.6793	1	1	1	1	1	1	2
Paenibacillus~phage~Dragolir	Heunggongvirae	Uroviricota	Caudoviricetes	Caudovirales	Siphoviridae	Dragolirvirus		Outlier
Staphylococcus~phage~HSA84	Heunggongvirae	Uroviricota	Caudoviricetes	Caudovirales	Siphoviridae	Dubowvirus	preVC_90	Clustered	VC_90_1	21	0.3085	1	7.14599	0.3085	0.9857	1	1	1	1	1	2
Staphylococcus~phage~SA12	Heunggongvirae	Uroviricota	Caudoviricetes	Caudovirales	Siphoviridae	Dubowvirus	preVC_90	Clustered	VC_90_1	21	0.3085	1	7.14599	0.3085	0.9857	1	1	1	1	1	2
Staphylococcus~phage~SAP33	Heunggongvirae	Uroviricota	Caudoviricetes	Caudovirales	Siphoviridae	Dubowvirus	preVC_90	Clustered	VC_90_1	21	0.3085	1	7.14599	0.3085	0.9857	1	1	1	1	1	2
Staphylococcus~phage~TEM123	Heunggongvirae	Uroviricota	Caudoviricetes	Caudovirales	Siphoviridae	Dubowvirus	preVC_90	Clustered	VC_90_1	21	0.3085	1	7.14599	0.3085	0.9857	1	1	1	1	1	2
Actinomyces~virus~Av1	Heunggongvirae	Uroviricota	Caudoviricetes	Caudovirales	Podoviridae	Dybvigvirus		Outlier
Lactobacillus~phage~phiAT3	Heunggongvirae	Uroviricota	Caudoviricetes	Caudovirales	Siphoviridae	Fattrevirus	preVC_376	Clustered	VC_376_0	9	0.4842	1	7.29097	0.4842	0.9167	1	1	1	1	1	7
Staphylococcus~phage~2638A	Heunggongvirae	Uroviricota	Caudoviricetes	Caudovirales	Siphoviridae	Fibralongavirus		Outlier
Staphylococcus~phage~vB_SpsS_QT1	Heunggongvirae	Uroviricota	Caudoviricetes	Caudovirales	Siphoviridae	Fibralongavirus		Outlier
Lactobacillus~phage~Lb	Heunggongvirae	Uroviricota	Caudoviricetes	Caudovirales	Myoviridae	Heilongjiangvirus		Overlap (VC_90/VC_399)
Bacillus~phage~BCASJ1c	Heunggongvirae	Uroviricota	Caudoviricetes	Caudovirales	Siphoviridae	Jarrellvirus		Outlier
Brevibacillus~phage~Jimmer1	Heunggongvirae	Uroviricota	Caudoviricetes	Caudovirales	Myoviridae	Jimmervirus	preVC_276	Clustered	VC_276_0	5	0.7659	0.999999	6.10954	0.7659	1	1	1	1	1	1	2
Brevibacillus~phage~Jimmer2	Heunggongvirae	Uroviricota	Caudoviricetes	Caudovirales	Myoviridae	Jimmervirus	preVC_276	Clustered	VC_276_0	5	0.7659	0.999999	6.10954	0.7659	1	1	1	1	1	1	2
Brevibacillus~phage~Osiris	Heunggongvirae	Uroviricota	Caudoviricetes	Caudovirales	Myoviridae	Jimmervirus	preVC_276	Clustered	VC_276_0	5	0.7659	0.999999	6.10954	0.7659	1	1	1	1	1	1	2
Lactobacillus~phage~J-1	Heunggongvirae	Uroviricota	Caudoviricetes	Caudovirales	Siphoviridae	Junavirus	preVC_376	Clustered	VC_376_0	9	0.4842	1	7.29097	0.4842	0.9167	1	1	1	1	1	7
Lactobacillus~phage~LJ	Heunggongvirae	Uroviricota	Caudoviricetes	Caudovirales	Siphoviridae	Junavirus	preVC_376	Clustered	VC_376_0	9	0.4842	1	7.29097	0.4842	0.9167	1	1	1	1	1	7
Lactobacillus~phage~PL-1	Heunggongvirae	Uroviricota	Caudoviricetes	Caudovirales	Siphoviridae	Junavirus	preVC_376	Clustered	VC_376_0	9	0.4842	1	7.29097	0.4842	0.9167	1	1	1	1	1	7
Aeribacillus~phage~AP45	Heunggongvirae	Uroviricota	Caudoviricetes	Caudovirales	Siphoviridae	Kamchatkavirus		Overlap (VC_86/VC_399)
Lactobacillus~phage~Lc-Nu	Heunggongvirae	Uroviricota	Caudoviricetes	Caudovirales	Siphoviridae	Lacnuvirus	preVC_376	Clustered	VC_376_0	9	0.4842	1	7.29097	0.4842	0.9167	1	1	1	1	1	7
Lactobacillus~phage~LF1	Heunggongvirae	Uroviricota	Caudoviricetes	Caudovirales	Siphoviridae	Lafunavirus	preVC_380	Clustered	VC_380_0	2	0.1314	0.886653	6.245	0.1165	1	1	1	1	1	1	1
Lactobacillus~phage~Lrm1	Heunggongvirae	Uroviricota	Caudoviricetes	Caudovirales	Siphoviridae	Larmunavirus	preVC_376	Clustered	VC_376_0	9	0.4842	1	7.29097	0.4842	0.9167	1	1	1	1	1	7
Clostridium~phage~phiCD111	Heunggongvirae	Uroviricota	Caudoviricetes	Caudovirales	Siphoviridae	Leicestervirus	preVC_341	Clustered	VC_341_0	3	0.5144	0.995144	2.58033	0.5119	1	1	1	1	1	1	1
Clostridium~phage~phiCD146	Heunggongvirae	Uroviricota	Caudoviricetes	Caudovirales	Siphoviridae	Leicestervirus	preVC_341	Clustered	VC_341_0	3	0.5144	0.995144	2.58033	0.5119	1	1	1	1	1	1	1
Clostridium~phage~phiCD38-2	Heunggongvirae	Uroviricota	Caudoviricetes	Caudovirales	Siphoviridae	Leicestervirus	preVC_341	Clustered	VC_341_0	3	0.5144	0.995144	2.58033	0.5119	1	1	1	1	1	1	1
Clostridium~virus~phiC2	Heunggongvirae	Uroviricota	Caudoviricetes	Caudovirales	Myoviridae	Lubbockvirus	preVC_233	Clustered	VC_233_2	4	0.2735	0.999958	7.14163	0.2735	1	1	1	1	1	1	2
Brevibacterium~phage~LuckyBarnes	Heunggongvirae	Uroviricota	Caudoviricetes	Caudovirales	Siphoviridae	Luckybarnesvirus	preVC_154	Clustered	VC_154_0	2	0.1522	0.899137	7.07107	0.1368	1	1	1	1	1	1	2
Faecalibacterium~phage~FP_Lugh	Heunggongvirae	Uroviricota	Caudoviricetes	Caudovirales	Siphoviridae	Lughvirus		Outlier
Streptococcus~phage~7201	Heunggongvirae	Uroviricota	Caudoviricetes	Caudovirales	Siphoviridae	Moineauvirus		Overlap (VC_227/VC_380)
Streptococcus~phage~Abc2	Heunggongvirae	Uroviricota	Caudoviricetes	Caudovirales	Siphoviridae	Moineauvirus		Overlap (VC_227/VC_380)
Streptococcus~phage~Sfi19	Heunggongvirae	Uroviricota	Caudoviricetes	Caudovirales	Siphoviridae	Moineauvirus		Overlap (VC_227/VC_380)
Streptococcus~phage~Sfi21	Heunggongvirae	Uroviricota	Caudoviricetes	Caudovirales	Siphoviridae	Moineauvirus		Overlap (VC_227/VC_380)
Streptococcus~phage~YMC-2011	Heunggongvirae	Uroviricota	Caudoviricetes	Caudovirales	Siphoviridae	Moineauvirus		Overlap (VC_227/VC_380)
Streptococcus~virus~DT1	Heunggongvirae	Uroviricota	Caudoviricetes	Caudovirales	Siphoviridae	Moineauvirus		Overlap (VC_227/VC_380)
Bacillus~phage~AP50	Bamfordvirae	Preplasmiviricota	Tectiliviricetes	Kalamavirales	Tectiviridae	Betatectivirus	preVC_214	Clustered	VC_214_0	4	1	0	3.80572	0	1	1	1	1	1	1	1
Bacillus~phage~Bam35c	Bamfordvirae	Preplasmiviricota	Tectiliviricetes	Kalamavirales	Tectiviridae	Betatectivirus	preVC_214	Clustered	VC_214_0	4	1	0	3.80572	0	1	1	1	1	1	1	1
Bacillus~phage~GIL16c	Bamfordvirae	Preplasmiviricota	Tectiliviricetes	Kalamavirales	Tectiviridae	Betatectivirus	preVC_214	Clustered	VC_214_0	4	1	0	3.80572	0	1	1	1	1	1	1	1
Bacillus~phage~Wip1	Bamfordvirae	Preplasmiviricota	Tectiliviricetes	Kalamavirales	Tectiviridae	Betatectivirus	preVC_214	Clustered	VC_214_0	4	1	0	3.80572	0	1	1	1	1	1	1	1
Enterobacteria~phage~PR4	Bamfordvirae	Preplasmiviricota	Tectiliviricetes	Kalamavirales	Tectiviridae	Alphatectivirus	preVC_405	Clustered	VC_405_0	2	0.9596	0.5205	0	0.4995	1	1	1	1	1	1	1
Enterobacteria~phage~PRD1	Bamfordvirae	Preplasmiviricota	Tectiliviricetes	Kalamavirales	Tectiviridae	Alphatectivirus	preVC_405	Clustered	VC_405_0	2	0.9596	0.5205	0	0.4995	1	1	1	1	1	1	1
Gluconobacter~phage~GC1	Bamfordvirae	Preplasmiviricota	Tectiliviricetes	Kalamavirales	Tectiviridae	Gammatectivirus		Outlier
Pseudoalteromonas~phage~Cr39582	Bamfordvirae	Preplasmiviricota	Tectiliviricetes	Vinavirales	Corticoviridae	Corticovirus	preVC_596	Clustered	VC_596_0	2	1	0	1	0	1	1	1	1	1	1	1
Pseudoalteromonas~phage~PM2	Bamfordvirae	Preplasmiviricota	Tectiliviricetes	Vinavirales	Corticoviridae	Corticovirus	preVC_596	Clustered	VC_596_0	2	1	0	1	0	1	1	1	1	1	1	1
Rhodococcus~phage~Toil	Bamfordvirae	Preplasmiviricota	Tectiliviricetes	Kalamavirales	Tectiviridae	Epsilontectivirus		Outlier
Streptomyces~phage~Forthebois	Bamfordvirae	Preplasmiviricota	Tectiliviricetes	Kalamavirales	Tectiviridae	Deltatectivirus	preVC_611	Clustered	VC_611_0	2	0.8579	0.5205	0	0.4465	1	1	1	1	1	1	1
Streptomyces~phage~WheeHeim	Bamfordvirae	Preplasmiviricota	Tectiliviricetes	Kalamavirales	Tectiviridae	Deltatectivirus	preVC_611	Clustered	VC_611_0	2	0.8579	0.5205	0	0.4465	1	1	1	1	1	1	1
Sulfolobus~turreted~icosahedral~virus~1	Bamfordvirae	Preplasmiviricota	Tectiliviricetes	Belfryvirales	Turriviridae	Alphaturrivirus	preVC_624	Clustered	VC_624_0	2	1	0	1.73205	0	1	1	1	1	1	1	1
Sulfolobus~turreted~icosahedral~virus~2	Bamfordvirae	Preplasmiviricota	Tectiliviricetes	Belfryvirales	Turriviridae	Alphaturrivirus	preVC_624	Clustered	VC_624_0	2	1	0	1.73205	0	1	1	1	1	1	1	1
Vibrio~phage~1.008.O._10N.286.54.E5	Bamfordvirae	Preplasmiviricota	Tectiliviricetes	Unassigned	Autolykiviridae	Paulavirus	preVC_628	Clustered	VC_628_0	4	0.9312	0.987498	1.13807	0.9196	1	1	1	1	0	1	2
Vibrio~phage~1.020.O._10N.222.48.A2	Bamfordvirae	Preplasmiviricota	Tectiliviricetes	Unassigned	Autolykiviridae	Paulavirus	preVC_628	Clustered	VC_628_0	4	0.9312	0.987498	1.13807	0.9196	1	1	1	1	0	1	2
Vibrio~phage~1.044.O._10N.261.51.B8	Bamfordvirae	Preplasmiviricota	Tectiliviricetes	Unassigned	Autolykiviridae	Livvievirus	preVC_628	Clustered	VC_628_0	4	0.9312	0.987498	1.13807	0.9196	1	1	1	1	0	1	2
Vibrio~phage~1.080.O._10N.286.48.A4	Bamfordvirae	Preplasmiviricota	Tectiliviricetes	Unassigned	Autolykiviridae	Paulavirus	preVC_628	Clustered	VC_628_0	4	0.9312	0.987498	1.13807	0.9196	1	1	1	1	0	1	2
Vibrio~phage~1.249.A._10N.261.55.B9	Bamfordvirae	Preplasmiviricota	Tectiliviricetes	Unassigned	Autolykiviridae	Livvievirus		Outlier
Haloarcula~californiae~icosahedral~virus~1	Helvetiavirae	Dividoviricota	Laserviricetes	Halopanivirales	Sphaerolipoviridae	Alphasphaerolipovirus	preVC_468	Clustered	VC_468_0	4	1	0	3.84944	0	1	1	1	1	1	1	1
Haloarcula~hispanica~icosahedral~virus~2	Helvetiavirae	Dividoviricota	Laserviricetes	Halopanivirales	Sphaerolipoviridae	Alphasphaerolipovirus	preVC_468	Clustered	VC_468_0	4	1	0	3.84944	0	1	1	1	1	1	1	1
Haloarcula~hispanica~virus~PH1	Helvetiavirae	Dividoviricota	Laserviricetes	Halopanivirales	Sphaerolipoviridae	Alphasphaerolipovirus	preVC_468	Clustered	VC_468_0	4	1	0	3.84944	0	1	1	1	1	1	1	1
Haloarcula~hispanica~virus~SH1	Helvetiavirae	Dividoviricota	Laserviricetes	Halopanivirales	Sphaerolipoviridae	Alphasphaerolipovirus	preVC_468	Clustered	VC_468_0	4	1	0	3.84944	0	1	1	1	1	1	1	1
Natrinema~virus~SNJ1	Helvetiavirae	Dividoviricota	Laserviricetes	Halopanivirales	Sphaerolipoviridae	Betasphaerolipovirus		Singleton
Thermus~phage~P23-77	Helvetiavirae	Dividoviricota	Laserviricetes	Halopanivirales	Sphaerolipoviridae	Gammasphaerolipovirus	preVC_626	Clustered	VC_626_0	2	1	0	2.44949	0	1	1	1	1	1	1	1
Thermus~virus~IN93	Helvetiavirae	Dividoviricota	Laserviricetes	Halopanivirales	Sphaerolipoviridae	Gammasphaerolipovirus	preVC_626	Clustered	VC_626_0	2	1	0	2.44949	0	1	1	1	1	1	1	1
Achromobacter~phage~83-24	Heunggongvirae	Uroviricota	Caudoviricetes	Caudovirales	Siphoviridae	Steinhofvirus	preVC_0	Clustered	VC_0_0	2	0.1772	0.908019	2	0.1609	1	1	1	1	1	1	1
Achromobacter~phage~JWAlpha	Heunggongvirae	Uroviricota	Caudoviricetes	Caudovirales	Schitoviridae	Jwalphavirus	preVC_8	Clustered	VC_8_0	27	0.7083	1	7.98326	0.7083	0.7094	1	1	1	1	1	14
Achromobacter~phage~JWF	Heunggongvirae	Uroviricota	Caudoviricetes	Caudovirales	Siphoviridae	Unassigned	preVC_18	Clustered	VC_18_0	2	1	0	7	0	1	1	1	1	1	1	1
Achromobacter~phage~JWX	Heunggongvirae	Uroviricota	Caudoviricetes	Caudovirales	Siphoviridae	Steinhofvirus	preVC_0	Clustered	VC_0_0	2	0.1772	0.908019	2	0.1609	1	1	1	1	1	1	1
Achromobacter~phage~Mano	Heunggongvirae	Uroviricota	Caudoviricetes	Caudovirales	Myoviridae	Unassigned	preVC_20	Clustered	VC_20_0	8	0.4772	1	5.44201	0.4772	1	1	1	1	1	1	1
Achromobacter~phage~Motura	Heunggongvirae	Uroviricota	Caudoviricetes	Caudovirales	Myoviridae	Moturavirus	preVC_25	Clustered/Singleton	VC_25_1	1	0	0	0	0	1	1	1	1	1	1	1
Achromobacter~phage~phiAxp-1	Heunggongvirae	Uroviricota	Caudoviricetes	Caudovirales	Siphoviridae	Unassigned	preVC_1	Clustered	VC_1_0	12	0.6938	1	6.09394	0.6938	1	1	1	1	1	1	4
Achromobacter~phage~phiAxp-2	Heunggongvirae	Uroviricota	Caudoviricetes	Caudovirales	Siphoviridae	Unassigned	preVC_35	Clustered	VC_35_0	7	0.0542	0.997448	6.96667	0.054	1	1	1	1	1	2	2
Achromobacter~phage~phiAxp-3	Heunggongvirae	Uroviricota	Caudoviricetes	Caudovirales	Schitoviridae	Jwalphavirus	preVC_8	Clustered	VC_8_0	27	0.7083	1	7.98326	0.7083	0.7094	1	1	1	1	1	14
Achromobacter~phage~vB_AchrS_AchV4	Heunggongvirae	Uroviricota	Caudoviricetes	Caudovirales	Siphoviridae	Unassigned		Overlap (VC_30/VC_36)
Achromobacter~phage~vB_AxyP_19-32_Axy04	Heunggongvirae	Uroviricota	Caudoviricetes	Caudovirales	Schitoviridae	Dongdastvirus	preVC_8	Clustered	VC_8_0	27	0.7083	1	7.98326	0.7083	0.7094	1	1	1	1	1	14
Achromobacter~phage~vB_AxyP_19-32_Axy10	Heunggongvirae	Uroviricota	Caudoviricetes	Caudovirales	Schitoviridae	Pourcelvirus	preVC_8	Clustered	VC_8_0	27	0.7083	1	7.98326	0.7083	0.7094	1	1	1	1	1	14
Achromobacter~phage~vB_AxyP_19-32_Axy11	Heunggongvirae	Uroviricota	Caudoviricetes	Caudovirales	Schitoviridae	Pourcelvirus	preVC_8	Clustered	VC_8_0	27	0.7083	1	7.98326	0.7083	0.7094	1	1	1	1	1	14
Achromobacter~phage~vB_AxyP_19-32_Axy12	Heunggongvirae	Uroviricota	Caudoviricetes	Caudovirales	Schitoviridae	Dongdastvirus	preVC_8	Clustered	VC_8_0	27	0.7083	1	7.98326	0.7083	0.7094	1	1	1	1	1	14
Achromobacter~phage~vB_AxyP_19-32_Axy24	Heunggongvirae	Uroviricota	Caudoviricetes	Caudovirales	Schitoviridae	Dongdastvirus	preVC_8	Clustered	VC_8_0	27	0.7083	1	7.98326	0.7083	0.7094	1	1	1	1	1	14
Acidovorax~phage~ACP17	Heunggongvirae	Uroviricota	Caudoviricetes	Caudovirales	Myoviridae	Busanvirus		Outlier
Acinetobacter~phage~133	Heunggongvirae	Uroviricota	Caudoviricetes	Caudovirales	Straboviridae	Unassigned		Overlap (VC_52/VC_56/VC_60)
Acinetobacter~phage~AB1	Heunggongvirae	Uroviricota	Caudoviricetes	Caudovirales	Myoviridae	Obolenskvirus	preVC_63	Clustered	VC_63_0	9	0.8188	1	6.23272	0.8188	1	1	1	1	1	1	1
Acinetobacter~phage~AB3	Heunggongvirae	Uroviricota	Caudoviricetes	Caudovirales	Autographiviridae	Friunavirus	preVC_67	Clustered	VC_67_0	24	0.9573	1	3.85532	0.9573	1	1	1	1	1	1	2
Acinetobacter~phage~AM101	Heunggongvirae	Uroviricota	Caudoviricetes	Caudovirales	Myoviridae	Lazarusvirus		Overlap (VC_52/VC_56/VC_60)
Acinetobacter~phage~AP22	Heunggongvirae	Uroviricota	Caudoviricetes	Caudovirales	Myoviridae	Obolenskvirus	preVC_63	Clustered	VC_63_0	9	0.8188	1	6.23272	0.8188	1	1	1	1	1	1	1
Acinetobacter~phage~AbKT21phiIII	Heunggongvirae	Uroviricota	Caudoviricetes	Caudovirales	Autographiviridae	Friunavirus	preVC_67	Clustered	VC_67_0	24	0.9573	1	3.85532	0.9573	1	1	1	1	1	1	2
Acinetobacter~phage~AbP2	Heunggongvirae	Uroviricota	Caudoviricetes	Caudovirales	Myoviridae	Obolenskvirus	preVC_63	Clustered	VC_63_0	9	0.8188	1	6.23272	0.8188	1	1	1	1	1	1	1
Acinetobacter~phage~AbTZA1	Heunggongvirae	Uroviricota	Caudoviricetes	Caudovirales	Myoviridae	Hadassahvirus		Overlap (VC_52/VC_56/VC_60)
Acinetobacter~phage~Abp1	Heunggongvirae	Uroviricota	Caudoviricetes	Caudovirales	Autographiviridae	Friunavirus	preVC_67	Clustered	VC_67_0	24	0.9573	1	3.85532	0.9573	1	1	1	1	1	1	2
Acinetobacter~phage~Ac42	Heunggongvirae	Uroviricota	Caudoviricetes	Caudovirales	Myoviridae	Unassigned		Overlap (VC_52/VC_56/VC_60)
Acinetobacter~phage~Acj61	Heunggongvirae	Uroviricota	Caudoviricetes	Caudovirales	Straboviridae	Lasallevirus		Overlap (VC_52/VC_56/VC_60)
Acinetobacter~phage~Acj9	Heunggongvirae	Uroviricota	Caudoviricetes	Caudovirales	Myoviridae	Acajnonavirus		Overlap (VC_52/VC_56/VC_60)
Acinetobacter~phage~Fri1	Heunggongvirae	Uroviricota	Caudoviricetes	Caudovirales	Autographiviridae	Friunavirus	preVC_67	Clustered	VC_67_0	24	0.9573	1	3.85532	0.9573	1	1	1	1	1	1	2
Acinetobacter~phage~IME-200	Heunggongvirae	Uroviricota	Caudoviricetes	Caudovirales	Autographiviridae	Friunavirus	preVC_67	Clustered	VC_67_0	24	0.9573	1	3.85532	0.9573	1	1	1	1	1	1	2
Acinetobacter~phage~IMEAB3	Heunggongvirae	Uroviricota	Caudoviricetes	Caudovirales	Siphoviridae	Lokivirus	preVC_1	Clustered	VC_1_0	12	0.6938	1	6.09394	0.6938	1	1	1	1	1	1	4
Acinetobacter~phage~KARL-1	Heunggongvirae	Uroviricota	Caudoviricetes	Caudovirales	Myoviridae	Lazarusvirus		Overlap (VC_52/VC_56/VC_60)
Acinetobacter~phage~LZ35	Heunggongvirae	Uroviricota	Caudoviricetes	Caudovirales	Myoviridae	Obolenskvirus	preVC_63	Clustered	VC_63_0	9	0.8188	1	6.23272	0.8188	1	1	1	1	1	1	1
Acinetobacter~phage~Loki	Heunggongvirae	Uroviricota	Caudoviricetes	Caudovirales	Siphoviridae	Lokivirus	preVC_1	Clustered	VC_1_0	12	0.6938	1	6.09394	0.6938	1	1	1	1	1	1	4
Acinetobacter~phage~Petty	Heunggongvirae	Uroviricota	Caudoviricetes	Caudovirales	Autographiviridae	Pettyvirus	preVC_67	Clustered	VC_67_0	24	0.9573	1	3.85532	0.9573	1	1	1	1	1	1	2
Acinetobacter~phage~Presley	Heunggongvirae	Uroviricota	Caudoviricetes	Caudovirales	Schitoviridae	Presleyvirus		Outlier
Acinetobacter~phage~SH-Ab~15519	Heunggongvirae	Uroviricota	Caudoviricetes	Caudovirales	Autographiviridae	Friunavirus	preVC_67	Clustered	VC_67_0	24	0.9573	1	3.85532	0.9573	1	1	1	1	1	1	2
Acinetobacter~phage~SWH-Ab-1	Heunggongvirae	Uroviricota	Caudoviricetes	Caudovirales	Autographiviridae	Friunavirus	preVC_67	Clustered	VC_67_0	24	0.9573	1	3.85532	0.9573	1	1	1	1	1	1	2
Acinetobacter~phage~SWH-Ab-3	Heunggongvirae	Uroviricota	Caudoviricetes	Caudovirales	Autographiviridae	Friunavirus	preVC_67	Clustered	VC_67_0	24	0.9573	1	3.85532	0.9573	1	1	1	1	1	1	2
Acinetobacter~phage~VB_ApiP_XC38	Heunggongvirae	Uroviricota	Caudoviricetes	Caudovirales	Schitoviridae	Presleyvirus		Outlier
Acinetobacter~phage~WCHABP1	Heunggongvirae	Uroviricota	Caudoviricetes	Caudovirales	Myoviridae	Obolenskvirus	preVC_63	Clustered	VC_63_0	9	0.8188	1	6.23272	0.8188	1	1	1	1	1	1	1
Acinetobacter~phage~WCHABP12	Heunggongvirae	Uroviricota	Caudoviricetes	Caudovirales	Myoviridae	Obolenskvirus	preVC_63	Clustered	VC_63_0	9	0.8188	1	6.23272	0.8188	1	1	1	1	1	1	1
Acinetobacter~phage~WCHABP5	Heunggongvirae	Uroviricota	Caudoviricetes	Caudovirales	Autographiviridae	Friunavirus	preVC_67	Clustered	VC_67_0	24	0.9573	1	3.85532	0.9573	1	1	1	1	1	1	2
Acinetobacter~phage~YMC-13-01-C62	Heunggongvirae	Uroviricota	Caudoviricetes	Caudovirales	Myoviridae	Obolenskvirus	preVC_63	Clustered	VC_63_0	9	0.8188	1	6.23272	0.8188	1	1	1	1	1	1	1
Acinetobacter~phage~YMC/09/02/B1251	Heunggongvirae	Uroviricota	Caudoviricetes	Caudovirales	Siphoviridae	Vieuvirus	preVC_69	Clustered	VC_69_0	3	0.8926	0.983333	6.44017	0.8777	1	1	1	1	1	1	1
Acinetobacter~phage~YMC11/11/R3177	Heunggongvirae	Uroviricota	Caudoviricetes	Caudovirales	Siphoviridae	Vieuvirus	preVC_69	Clustered	VC_69_0	3	0.8926	0.983333	6.44017	0.8777	1	1	1	1	1	1	1
Acinetobacter~phage~YMC11/12/R2315	Heunggongvirae	Uroviricota	Caudoviricetes	Caudovirales	Myoviridae	Obolenskvirus	preVC_63	Clustered	VC_63_0	9	0.8188	1	6.23272	0.8188	1	1	1	1	1	1	1
Acinetobacter~phage~YMC13/03/R2096	Heunggongvirae	Uroviricota	Caudoviricetes	Caudovirales	Myoviridae	Unassigned		Outlier
Acinetobacter~phage~ZZ1	Heunggongvirae	Uroviricota	Caudoviricetes	Caudovirales	Myoviridae	Zedzedvirus		Overlap (VC_52/VC_56/VC_60)
Acinetobacter~phage~phiAB1	Heunggongvirae	Uroviricota	Caudoviricetes	Caudovirales	Autographiviridae	Friunavirus	preVC_67	Clustered	VC_67_0	24	0.9573	1	3.85532	0.9573	1	1	1	1	1	1	2
Acinetobacter~phage~phiAB6	Heunggongvirae	Uroviricota	Caudoviricetes	Caudovirales	Autographiviridae	Friunavirus	preVC_67	Clustered	VC_67_0	24	0.9573	1	3.85532	0.9573	1	1	1	1	1	1	2
Acinetobacter~phage~phiAC-1	Heunggongvirae	Uroviricota	Caudoviricetes	Caudovirales	Myoviridae	Unassigned		Outlier
Acinetobacter~phage~vB_AbaM-IME-AB2	Heunggongvirae	Uroviricota	Caudoviricetes	Caudovirales	Myoviridae	Obolenskvirus	preVC_63	Clustered	VC_63_0	9	0.8188	1	6.23272	0.8188	1	1	1	1	1	1	1
Acinetobacter~phage~vB_AbaM_Acibel004	Heunggongvirae	Uroviricota	Caudoviricetes	Caudovirales	Myoviridae	Saclayvirus	preVC_71	Clustered/Singleton	VC_71_1	1	0	0	0	0	1	1	1	1	1	1	1
Acinetobacter~phage~vB_AbaM_Apostate	Heunggongvirae	Uroviricota	Caudoviricetes	Caudovirales	Myoviridae	Lazarusvirus		Overlap (VC_52/VC_56/VC_60)
Acinetobacter~phage~vB_AbaM_B09_Aci01-1	Heunggongvirae	Uroviricota	Caudoviricetes	Caudovirales	Myoviridae	Saclayvirus	preVC_71	Clustered	VC_71_0	4	0.6449	0.999957	5.18478	0.6449	1	1	1	1	1	1	1
Acinetobacter~phage~vB_AbaM_B09_Aci02-2	Heunggongvirae	Uroviricota	Caudoviricetes	Caudovirales	Myoviridae	Saclayvirus	preVC_71	Clustered	VC_71_0	4	0.6449	0.999957	5.18478	0.6449	1	1	1	1	1	1	1
Acinetobacter~phage~vB_AbaM_B09_Aci05	Heunggongvirae	Uroviricota	Caudoviricetes	Caudovirales	Myoviridae	Saclayvirus	preVC_71	Clustered	VC_71_0	4	0.6449	0.999957	5.18478	0.6449	1	1	1	1	1	1	1
Acinetobacter~phage~vB_AbaM_Berthold	Heunggongvirae	Uroviricota	Caudoviricetes	Caudovirales	Myoviridae	Lazarusvirus		Overlap (VC_52/VC_56/VC_60)
Acinetobacter~phage~vB_AbaM_Kimel	Heunggongvirae	Uroviricota	Caudoviricetes	Caudovirales	Myoviridae	Lazarusvirus		Overlap (VC_52/VC_56/VC_60)
Acinetobacter~phage~vB_AbaM_Konradin	Heunggongvirae	Uroviricota	Caudoviricetes	Caudovirales	Myoviridae	Lazarusvirus		Overlap (VC_52/VC_56/VC_60)
Acinetobacter~phage~vB_AbaM_Lazarus	Heunggongvirae	Uroviricota	Caudoviricetes	Caudovirales	Myoviridae	Lazarusvirus		Overlap (VC_52/VC_56/VC_60)
Acinetobacter~phage~vB_AbaM_ME3	Heunggongvirae	Uroviricota	Caudoviricetes	Caudovirales	Myoviridae	Metrivirus		Singleton
Acinetobacter~phage~vB_AbaM_PhT2	Heunggongvirae	Uroviricota	Caudoviricetes	Caudovirales	Myoviridae	Hadassahvirus		Overlap (VC_52/VC_56/VC_60)
Acinetobacter~phage~vB_AbaM_phiAbaA1	Heunggongvirae	Uroviricota	Caudoviricetes	Caudovirales	Myoviridae	Saclayvirus	preVC_71	Clustered	VC_71_0	4	0.6449	0.999957	5.18478	0.6449	1	1	1	1	1	1	1
Acinetobacter~phage~vB_AbaP_46-62_Aci07	Heunggongvirae	Uroviricota	Caudoviricetes	Caudovirales	Autographiviridae	Friunavirus	preVC_67	Clustered	VC_67_0	24	0.9573	1	3.85532	0.9573	1	1	1	1	1	1	2
Acinetobacter~phage~vB_AbaP_AS11	Heunggongvirae	Uroviricota	Caudoviricetes	Caudovirales	Autographiviridae	Friunavirus	preVC_67	Clustered	VC_67_0	24	0.9573	1	3.85532	0.9573	1	1	1	1	1	1	2
Acinetobacter~phage~vB_AbaP_AS12	Heunggongvirae	Uroviricota	Caudoviricetes	Caudovirales	Autographiviridae	Friunavirus	preVC_67	Clustered	VC_67_0	24	0.9573	1	3.85532	0.9573	1	1	1	1	1	1	2
Acinetobacter~phage~vB_AbaP_Acibel007	Heunggongvirae	Uroviricota	Caudoviricetes	Caudovirales	Autographiviridae	Daemvirus		Outlier
Acinetobacter~phage~vB_AbaP_B09_Aci08	Heunggongvirae	Uroviricota	Caudoviricetes	Caudovirales	Autographiviridae	Friunavirus	preVC_67	Clustered	VC_67_0	24	0.9573	1	3.85532	0.9573	1	1	1	1	1	1	2
Acinetobacter~phage~vB_AbaP_B1	Heunggongvirae	Uroviricota	Caudoviricetes	Caudovirales	Autographiviridae	Friunavirus	preVC_67	Clustered	VC_67_0	24	0.9573	1	3.85532	0.9573	1	1	1	1	1	1	2
Acinetobacter~phage~vB_AbaP_B3	Heunggongvirae	Uroviricota	Caudoviricetes	Caudovirales	Autographiviridae	Friunavirus	preVC_67	Clustered	VC_67_0	24	0.9573	1	3.85532	0.9573	1	1	1	1	1	1	2
Acinetobacter~phage~vB_AbaP_B5	Heunggongvirae	Uroviricota	Caudoviricetes	Caudovirales	Autographiviridae	Friunavirus	preVC_67	Clustered	VC_67_0	24	0.9573	1	3.85532	0.9573	1	1	1	1	1	1	2
Acinetobacter~phage~vB_AbaP_D2	Heunggongvirae	Uroviricota	Caudoviricetes	Caudovirales	Autographiviridae	Friunavirus	preVC_67	Clustered	VC_67_0	24	0.9573	1	3.85532	0.9573	1	1	1	1	1	1	2
Acinetobacter~phage~vB_AbaP_PD-6A3	Heunggongvirae	Uroviricota	Caudoviricetes	Caudovirales	Autographiviridae	Friunavirus	preVC_67	Clustered	VC_67_0	24	0.9573	1	3.85532	0.9573	1	1	1	1	1	1	2
Acinetobacter~phage~vB_AbaP_PD-AB9	Heunggongvirae	Uroviricota	Caudoviricetes	Caudovirales	Autographiviridae	Friunavirus	preVC_67	Clustered	VC_67_0	24	0.9573	1	3.85532	0.9573	1	1	1	1	1	1	2
Acinetobacter~phage~vB_AbaS_TRS1	Heunggongvirae	Uroviricota	Caudoviricetes	Caudovirales	Siphoviridae	Unassigned	preVC_69	Clustered	VC_69_0	3	0.8926	0.983333	6.44017	0.8777	1	1	1	1	1	1	1
Acinetobacter~phage~vB_ApiM_fHyAci03	Heunggongvirae	Uroviricota	Caudoviricetes	Caudovirales	Myoviridae	Lazarusvirus		Overlap (VC_52/VC_56/VC_60)
Acinetobacter~phage~vB_ApiP_P1	Heunggongvirae	Uroviricota	Caudoviricetes	Caudovirales	Autographiviridae	Friunavirus	preVC_67	Clustered	VC_67_0	24	0.9573	1	3.85532	0.9573	1	1	1	1	1	1	2
Acinetobacter~phage~vB_ApiP_P2	Heunggongvirae	Uroviricota	Caudoviricetes	Caudovirales	Autographiviridae	Friunavirus	preVC_67	Clustered	VC_67_0	24	0.9573	1	3.85532	0.9573	1	1	1	1	1	1	2
Actinoplanes~phage~phiAsp2	Heunggongvirae	Uroviricota	Caudoviricetes	Caudovirales	Siphoviridae	Unassigned		Outlier
Aeromonas~phage~25	Heunggongvirae	Uroviricota	Caudoviricetes	Caudovirales	Myoviridae	Tulanevirus		Overlap (VC_53/VC_56/VC_60)
Aeromonas~phage~25AhydR2PP	Heunggongvirae	Uroviricota	Caudoviricetes	Caudovirales	Autographiviridae	Aerosvirus	preVC_94	Clustered	VC_94_0	14	0.6282	1	5.87943	0.6282	1	1	1	1	1	1	8
Aeromonas~phage~2L372D	Heunggongvirae	Uroviricota	Caudoviricetes	Caudovirales	Myoviridae	Plateaulakevirus	preVC_99	Clustered	VC_99_0	3	0.2299	0.995432	8.29074	0.2288	0.6667	1	1	1	1	1	1
Aeromonas~phage~2L372X	Heunggongvirae	Uroviricota	Caudoviricetes	Caudovirales	Myoviridae	Plateaulakevirus	preVC_99	Clustered	VC_99_0	3	0.2299	0.995432	8.29074	0.2288	0.6667	1	1	1	1	1	1
Aeromonas~phage~2_D05	Heunggongvirae	Uroviricota	Caudoviricetes	Caudovirales	Myoviridae	Unassigned	preVC_64	Clustered	VC_64_0	3	0.3665	0.996348	5.05171	0.3652	1	1	1	1	1	1	1
Aeromonas~phage~44RR2.8t	Heunggongvirae	Uroviricota	Caudoviricetes	Caudovirales	Myoviridae	Biquartavirus		Overlap (VC_53/VC_56/VC_60)
Aeromonas~phage~4L372D	Heunggongvirae	Uroviricota	Caudoviricetes	Caudovirales	Myoviridae	Plateaulakevirus	preVC_99	Clustered	VC_99_0	3	0.2299	0.995432	8.29074	0.2288	0.6667	1	1	1	1	1	1
Aeromonas~phage~4L372XY	Heunggongvirae	Uroviricota	Caudoviricetes	Caudovirales	Myoviridae	Plateaulakevirus	preVC_99	Clustered/Singleton	VC_99_1	1	0	0	0	0	1	1	1	1	1	1	1
Aeromonas~phage~4_4572	Heunggongvirae	Uroviricota	Caudoviricetes	Caudovirales	Podoviridae	Lahexavirus	preVC_92	Clustered	VC_92_0	4	0.4904	0.99996	5.87442	0.4904	1	1	1	1	1	1	1
Aeromonas~phage~4_D05	Heunggongvirae	Uroviricota	Caudoviricetes	Caudovirales	Myoviridae	Unassigned	preVC_64	Clustered	VC_64_0	3	0.3665	0.996348	5.05171	0.3652	1	1	1	1	1	1	1
Aeromonas~phage~50AhydR13PP	Heunggongvirae	Uroviricota	Caudoviricetes	Caudovirales	Myoviridae	Tulanevirus		Overlap (VC_53/VC_56/VC_60)
Aeromonas~phage~60AhydR15PP	Heunggongvirae	Uroviricota	Caudoviricetes	Caudovirales	Myoviridae	Tulanevirus		Overlap (VC_53/VC_56/VC_60)
Aeromonas~phage~65	Heunggongvirae	Uroviricota	Caudoviricetes	Caudovirales	Myoviridae	Ishigurovirus		Overlap (VC_54/VC_55/VC_62)
Aeromonas~phage~AS-gz	Heunggongvirae	Uroviricota	Caudoviricetes	Caudovirales	Myoviridae	Tulanevirus		Overlap (VC_53/VC_56/VC_60)
Aeromonas~phage~AS-sw	Heunggongvirae	Uroviricota	Caudoviricetes	Caudovirales	Myoviridae	Ceceduovirus		Overlap (VC_54/VC_55/VC_62)
Aeromonas~phage~AS-zj	Heunggongvirae	Uroviricota	Caudoviricetes	Caudovirales	Myoviridae	Ceceduovirus		Overlap (VC_54/VC_55/VC_62)
Aeromonas~phage~Aeh1	Heunggongvirae	Uroviricota	Caudoviricetes	Caudovirales	Myoviridae	Unassigned		Overlap (VC_55/VC_62)
Aeromonas~phage~Aes012	Heunggongvirae	Uroviricota	Caudoviricetes	Caudovirales	Myoviridae	Tulanevirus		Overlap (VC_53/VC_56/VC_60)
Aeromonas~phage~Aes508	Heunggongvirae	Uroviricota	Caudoviricetes	Caudovirales	Myoviridae	Tulanevirus		Overlap (VC_53/VC_56/VC_60)
Aeromonas~phage~Ah1	Heunggongvirae	Uroviricota	Caudoviricetes	Caudovirales	Myoviridae	Unassigned		Overlap (VC_55/VC_62)
Aeromonas~phage~AhSzq-1	Heunggongvirae	Uroviricota	Caudoviricetes	Caudovirales	Demerecviridae	Shenzhenvirus		Overlap (VC_112/VC_115)
Aeromonas~phage~AhSzw-1	Heunggongvirae	Uroviricota	Caudoviricetes	Caudovirales	Demerecviridae	Shenzhenvirus		Overlap (VC_112/VC_115)
Aeromonas~phage~Ahp1	Heunggongvirae	Uroviricota	Caudoviricetes	Caudovirales	Autographiviridae	Ahphunavirus	preVC_94	Clustered	VC_94_0	14	0.6282	1	5.87943	0.6282	1	1	1	1	1	1	8
Aeromonas~phage~BUCT551	Heunggongvirae	Uroviricota	Caudoviricetes	Caudovirales	Siphoviridae	Unassigned		Overlap (VC_31/VC_36)
Aeromonas~phage~CC2	Heunggongvirae	Uroviricota	Caudoviricetes	Caudovirales	Myoviridae	Ceceduovirus		Overlap (VC_54/VC_55/VC_62)
Aeromonas~phage~CF7	Heunggongvirae	Uroviricota	Caudoviricetes	Caudovirales	Autographiviridae	Ahphunavirus	preVC_94	Clustered	VC_94_0	14	0.6282	1	5.87943	0.6282	1	1	1	1	1	1	8
Aeromonas~phage~LAh_6	Heunggongvirae	Uroviricota	Caudoviricetes	Caudovirales	Podoviridae	Lahexavirus	preVC_92	Clustered	VC_92_0	4	0.4904	0.99996	5.87442	0.4904	1	1	1	1	1	1	1
Aeromonas~phage~LAh_7	Heunggongvirae	Uroviricota	Caudoviricetes	Caudovirales	Siphoviridae	Unassigned		Overlap (VC_31/VC_36)
Aeromonas~phage~LAh_8	Heunggongvirae	Uroviricota	Caudoviricetes	Caudovirales	Podoviridae	Lahexavirus	preVC_92	Clustered	VC_92_0	4	0.4904	0.99996	5.87442	0.4904	1	1	1	1	1	1	1
Aeromonas~phage~LAh_9	Heunggongvirae	Uroviricota	Caudoviricetes	Caudovirales	Podoviridae	Lahexavirus	preVC_92	Clustered	VC_92_0	4	0.4904	0.99996	5.87442	0.4904	1	1	1	1	1	1	1
Aeromonas~phage~PX29	Heunggongvirae	Uroviricota	Caudoviricetes	Caudovirales	Myoviridae	Unassigned		Overlap (VC_55/VC_62)
Aeromonas~phage~ZPAH7	Heunggongvirae	Uroviricota	Caudoviricetes	Caudovirales	Autographiviridae	Aerosvirus	preVC_94	Clustered	VC_94_0	14	0.6282	1	5.87943	0.6282	1	1	1	1	1	1	8
Aeromonas~phage~pAh6-C	Heunggongvirae	Uroviricota	Caudoviricetes	Caudovirales	Chaseviridae	Pahsextavirus	preVC_119	Clustered	VC_119_0	3	0.2174	0.995219	3.42433	0.2164	1	1	1	1	1	1	2
Aeromonas~phage~pIS4-A	Heunggongvirae	Uroviricota	Caudoviricetes	Caudovirales	Siphoviridae	Roufvirus	preVC_121	Clustered	VC_121_0	24	0.9256	1	7.36638	0.9256	0.9674	1	1	1	1	1	1
Aeromonas~phage~phiA8-29	Heunggongvirae	Uroviricota	Caudoviricetes	Caudovirales	Ackermannviridae	Tedavirus		Outlier
Aeromonas~phage~phiAS4	Heunggongvirae	Uroviricota	Caudoviricetes	Caudovirales	Myoviridae	Tulanevirus		Overlap (VC_53/VC_56/VC_60)
Aeromonas~phage~phiAS5	Heunggongvirae	Uroviricota	Caudoviricetes	Caudovirales	Myoviridae	Unassigned		Overlap (VC_55/VC_62)
Aeromonas~phage~phiAS7	Heunggongvirae	Uroviricota	Caudoviricetes	Caudovirales	Autographiviridae	Aerosvirus	preVC_94	Clustered	VC_94_0	14	0.6282	1	5.87943	0.6282	1	1	1	1	1	1	8
Aeromonas~phage~phiO18P	Heunggongvirae	Uroviricota	Caudoviricetes	Caudovirales	Myoviridae	Bielevirus	preVC_125	Clustered	VC_125_0	20	0.9706	1	5.56846	0.9706	1	1	1	1	1	1	12
Aeromonas~phage~vB_AhyS-A18P4	Heunggongvirae	Uroviricota	Caudoviricetes	Caudovirales	Siphoviridae	Unassigned		Overlap (VC_31/VC_36)
Aeromonas~phage~vB_AsaM-56	Heunggongvirae	Uroviricota	Caudoviricetes	Caudovirales	Myoviridae	Popoffvirus	preVC_64	Clustered	VC_64_0	3	0.3665	0.996348	5.05171	0.3652	1	1	1	1	1	1	1
Aeromonas~virus~31	Heunggongvirae	Uroviricota	Caudoviricetes	Caudovirales	Myoviridae	Biquartavirus		Overlap (VC_53/VC_56/VC_60)
Aggregatibacter~phage~S1249	Heunggongvirae	Uroviricota	Caudoviricetes	Caudovirales	Myoviridae	Unassigned	preVC_126	Clustered	VC_126_0	2	0.4216	0.891494	4.3589	0.3758	1	1	1	1	1	1	0
Agrobacterium~phage~7-7-1	Heunggongvirae	Uroviricota	Caudoviricetes	Caudovirales	Myoviridae	Schmittlotzvirus		Outlier
Agrobacterium~phage~Atu_ph02	Heunggongvirae	Uroviricota	Caudoviricetes	Caudovirales	Autographiviridae	Atuphduovirus	preVC_98	Clustered	VC_98_0	2	0.2304	0.907355	0	0.2091	1	1	1	1	1	1	1
Agrobacterium~phage~Atu_ph03	Heunggongvirae	Uroviricota	Caudoviricetes	Caudovirales	Autographiviridae	Atuphduovirus	preVC_98	Clustered	VC_98_0	2	0.2304	0.907355	0	0.2091	1	1	1	1	1	1	1
Agrobacterium~phage~Atu_ph07	Heunggongvirae	Uroviricota	Caudoviricetes	Caudovirales	Myoviridae	Polybotosvirus		Outlier
Agrobacterium~phage~OLIVR1	Heunggongvirae	Uroviricota	Caudoviricetes	Caudovirales	Schitoviridae	Unassigned	preVC_8	Clustered	VC_8_0	27	0.7083	1	7.98326	0.7083	0.7094	1	1	1	1	1	14
Agrobacterium~phage~OLIVR5	Heunggongvirae	Uroviricota	Caudoviricetes	Caudovirales	Ackermannviridae	Unassigned	preVC_46	Clustered/Singleton	VC_46_1	1	0	0	0	0	1	1	1	1	1	1	0
Alphaproteobacteria~virus~phiJl001	Heunggongvirae	Uroviricota	Caudoviricetes	Caudovirales	Siphoviridae	Yuavirus		Outlier
Alteromonas~phage~vB_AcoS-R7M	Heunggongvirae	Uroviricota	Caudoviricetes	Caudovirales	Siphoviridae	Amoyvirus		Outlier
Alteromonas~phage~vB_AmaP_AD45-P1	Heunggongvirae	Uroviricota	Caudoviricetes	Caudovirales	Schitoviridae	Unassigned		Outlier
Alteromonas~phage~vB_AmeM_PT11-V22	Heunggongvirae	Uroviricota	Caudoviricetes	Caudovirales	Myoviridae	Myoalterovirus		Outlier
Alteromonas~virus~vB_AspP-H4/4	Heunggongvirae	Uroviricota	Caudoviricetes	Caudovirales	Autographiviridae	Foturvirus		Outlier
Anabaena~phage~A-4L	Heunggongvirae	Uroviricota	Caudoviricetes	Caudovirales	Podoviridae	Kozyakovvirus		Outlier
Aquamicrobium~phage~P14	Heunggongvirae	Uroviricota	Caudoviricetes	Caudovirales	Autographiviridae	Aqualcavirus	preVC_95	Clustered	VC_95_0	26	0.6453	1	6.40041	0.6453	1	1	1	1	1	1	16
Archaeal~BJ1~virus	Heunggongvirae	Uroviricota	Caudoviricetes	Caudovirales	Siphoviridae	Unassigned	preVC_142	Clustered	VC_142_0	2	0.8778	0.5	4.24264	0.4389	1	1	1	1	1	1	0
Arthrobacter~phage~Abba	Heunggongvirae	Uroviricota	Caudoviricetes	Caudovirales	Myoviridae	Ayohtrevirus		Outlier
Arthrobacter~phage~Abidatro	Heunggongvirae	Uroviricota	Caudoviricetes	Caudovirales	Siphoviridae	Galaxyvirus	preVC_146	Clustered	VC_146_0	6	0.8393	1	5.72905	0.8393	1	1	1	1	1	1	4
Arthrobacter~phage~Adat	Heunggongvirae	Uroviricota	Caudoviricetes	Caudovirales	Podoviridae	Jasminevirus	preVC_152	Clustered	VC_152_0	2	1	0	2.64575	0	1	1	1	1	1	1	1
Arthrobacter~phage~Amigo	Heunggongvirae	Uroviricota	Caudoviricetes	Caudovirales	Siphoviridae	Amigovirus	preVC_153	Clustered	VC_153_0	2	0.7699	0.777778	2	0.5988	1	1	1	1	1	1	1
Arthrobacter~phage~Andrew	Heunggongvirae	Uroviricota	Caudoviricetes	Caudovirales	Siphoviridae	Andrewvirus	preVC_146	Clustered	VC_146_0	6	0.8393	1	5.72905	0.8393	1	1	1	1	1	1	4
Arthrobacter~phage~Anjali	Heunggongvirae	Uroviricota	Caudoviricetes	Caudovirales	Podoviridae	Anjalivirus		Overlap (VC_76/VC_77)
Arthrobacter~phage~BarretLemon	Heunggongvirae	Uroviricota	Caudoviricetes	Caudovirales	Myoviridae	Marthavirus	preVC_143	Clustered	VC_143_0	9	0.6874	1	3.18842	0.6874	1	1	1	1	1	1	1
Arthrobacter~phage~Beans	Heunggongvirae	Uroviricota	Caudoviricetes	Caudovirales	Myoviridae	Marthavirus	preVC_143	Clustered	VC_143_0	9	0.6874	1	3.18842	0.6874	1	1	1	1	1	1	1
Arthrobacter~phage~Bennie	Heunggongvirae	Uroviricota	Caudoviricetes	Caudovirales	Siphoviridae	Korravirus	preVC_147	Clustered	VC_147_0	22	0.9414	1	3.53011	0.9414	1	1	1	1	1	1	1
Arthrobacter~phage~BigMack	Heunggongvirae	Uroviricota	Caudoviricetes	Caudovirales	Siphoviridae	Korravirus	preVC_147	Clustered	VC_147_0	22	0.9414	1	3.53011	0.9414	1	1	1	1	1	1	1
Arthrobacter~phage~Brent	Heunggongvirae	Uroviricota	Caudoviricetes	Caudovirales	Myoviridae	Marthavirus	preVC_143	Clustered	VC_143_0	9	0.6874	1	3.18842	0.6874	1	1	1	1	1	1	1
Arthrobacter~phage~Bridgette	Heunggongvirae	Uroviricota	Caudoviricetes	Caudovirales	Siphoviridae	Bridgettevirus	preVC_159	Clustered	VC_159_0	5	0.9609	0.999876	4.63449	0.9608	1	1	1	1	1	1	1
Arthrobacter~phage~CaptnMurica	Heunggongvirae	Uroviricota	Caudoviricetes	Caudovirales	Siphoviridae	Gordonvirus		Overlap (VC_163/VC_164/VC_165)
Arthrobacter~phage~Circum	Heunggongvirae	Uroviricota	Caudoviricetes	Caudovirales	Siphoviridae	Mudcatvirus		Overlap (VC_162/VC_164/VC_165)
Arthrobacter~phage~Colucci	Heunggongvirae	Uroviricota	Caudoviricetes	Caudovirales	Myoviridae	Klausavirus	preVC_144	Clustered	VC_144_0	6	0.6084	1	4.69154	0.6084	1	1	1	1	1	1	1
Arthrobacter~phage~Constance	Heunggongvirae	Uroviricota	Caudoviricetes	Caudovirales	Siphoviridae	Bridgettevirus	preVC_159	Clustered	VC_159_0	5	0.9609	0.999876	4.63449	0.9608	1	1	1	1	1	1	1
Arthrobacter~phage~Coral	Heunggongvirae	Uroviricota	Caudoviricetes	Caudovirales	Siphoviridae	Coralvirus	preVC_146	Clustered	VC_146_0	6	0.8393	1	5.72905	0.8393	1	1	1	1	1	1	4
Arthrobacter~phage~DrManhattan	Heunggongvirae	Uroviricota	Caudoviricetes	Caudovirales	Siphoviridae	Manhattanvirus	preVC_157	Clustered	VC_157_0	4	0.532	0.99996	5.84855	0.532	1	1	1	1	1	1	4
Arthrobacter~phage~DrRobert	Heunggongvirae	Uroviricota	Caudoviricetes	Caudovirales	Siphoviridae	Korravirus	preVC_147	Clustered	VC_147_0	22	0.9414	1	3.53011	0.9414	1	1	1	1	1	1	1
Arthrobacter~phage~DrYang	Heunggongvirae	Uroviricota	Caudoviricetes	Caudovirales	Myoviridae	Klausavirus	preVC_144	Clustered	VC_144_0	6	0.6084	1	4.69154	0.6084	1	1	1	1	1	1	1
Arthrobacter~phage~Eileen	Heunggongvirae	Uroviricota	Caudoviricetes	Caudovirales	Siphoviridae	Bridgettevirus	preVC_159	Clustered	VC_159_0	5	0.9609	0.999876	4.63449	0.9608	1	1	1	1	1	1	1
Arthrobacter~phage~Galaxy	Heunggongvirae	Uroviricota	Caudoviricetes	Caudovirales	Siphoviridae	Galaxyvirus	preVC_146	Clustered	VC_146_0	6	0.8393	1	5.72905	0.8393	1	1	1	1	1	1	4
Arthrobacter~phage~Gisselle	Heunggongvirae	Uroviricota	Caudoviricetes	Caudovirales	Siphoviridae	Korravirus	preVC_147	Clustered	VC_147_0	22	0.9414	1	3.53011	0.9414	1	1	1	1	1	1	1
Arthrobacter~phage~Glenn	Heunggongvirae	Uroviricota	Caudoviricetes	Caudovirales	Siphoviridae	Korravirus	preVC_147	Clustered	VC_147_0	22	0.9414	1	3.53011	0.9414	1	1	1	1	1	1	1
Arthrobacter~phage~Gordon	Heunggongvirae	Uroviricota	Caudoviricetes	Caudovirales	Siphoviridae	Gordonvirus		Overlap (VC_163/VC_164/VC_165)
Arthrobacter~phage~GreenHearts	Heunggongvirae	Uroviricota	Caudoviricetes	Caudovirales	Siphoviridae	Korravirus	preVC_147	Clustered	VC_147_0	22	0.9414	1	3.53011	0.9414	1	1	1	1	1	1	1
Arthrobacter~phage~Greenhouse	Heunggongvirae	Uroviricota	Caudoviricetes	Caudovirales	Siphoviridae	Korravirus	preVC_147	Clustered	VC_147_0	22	0.9414	1	3.53011	0.9414	1	1	1	1	1	1	1
Arthrobacter~phage~HunterDalle	Heunggongvirae	Uroviricota	Caudoviricetes	Caudovirales	Siphoviridae	Korravirus	preVC_147	Clustered	VC_147_0	22	0.9414	1	3.53011	0.9414	1	1	1	1	1	1	1
Arthrobacter~phage~Huntingdon	Heunggongvirae	Uroviricota	Caudoviricetes	Caudovirales	Siphoviridae	Korravirus	preVC_147	Clustered	VC_147_0	22	0.9414	1	3.53011	0.9414	1	1	1	1	1	1	1
Arthrobacter~phage~Jasmine	Heunggongvirae	Uroviricota	Caudoviricetes	Caudovirales	Podoviridae	Jasminevirus	preVC_152	Clustered	VC_152_0	2	1	0	2.64575	0	1	1	1	1	1	1	1
Arthrobacter~phage~Jawnski	Heunggongvirae	Uroviricota	Caudoviricetes	Caudovirales	Myoviridae	Marthavirus	preVC_143	Clustered	VC_143_0	9	0.6874	1	3.18842	0.6874	1	1	1	1	1	1	1
Arthrobacter~phage~Joann	Heunggongvirae	Uroviricota	Caudoviricetes	Caudovirales	Siphoviridae	Korravirus	preVC_147	Clustered	VC_147_0	22	0.9414	1	3.53011	0.9414	1	1	1	1	1	1	1
Arthrobacter~phage~Judy	Heunggongvirae	Uroviricota	Caudoviricetes	Caudovirales	Siphoviridae	Bridgettevirus	preVC_159	Clustered	VC_159_0	5	0.9609	0.999876	4.63449	0.9608	1	1	1	1	1	1	1
Arthrobacter~phage~KBurrousTX	Heunggongvirae	Uroviricota	Caudoviricetes	Caudovirales	Myoviridae	Klausavirus	preVC_144	Clustered	VC_144_0	6	0.6084	1	4.69154	0.6084	1	1	1	1	1	1	1
Arthrobacter~phage~KellEzio	Heunggongvirae	Uroviricota	Caudoviricetes	Caudovirales	Siphoviridae	Kelleziovirus	preVC_170	Clustered	VC_170_0	2	1	0	2	0	1	1	1	1	1	1	1
Arthrobacter~phage~Kepler	Heunggongvirae	Uroviricota	Caudoviricetes	Caudovirales	Siphoviridae	Coralvirus	preVC_146	Clustered	VC_146_0	6	0.8393	1	5.72905	0.8393	1	1	1	1	1	1	4
Arthrobacter~phage~Kitkat	Heunggongvirae	Uroviricota	Caudoviricetes	Caudovirales	Siphoviridae	Kelleziovirus	preVC_170	Clustered	VC_170_0	2	1	0	2	0	1	1	1	1	1	1	1
Arthrobacter~phage~Kittykat	Heunggongvirae	Uroviricota	Caudoviricetes	Caudovirales	Siphoviridae	Korravirus	preVC_147	Clustered	VC_147_0	22	0.9414	1	3.53011	0.9414	1	1	1	1	1	1	1
Arthrobacter~phage~Korra	Heunggongvirae	Uroviricota	Caudoviricetes	Caudovirales	Siphoviridae	Korravirus	preVC_147	Clustered	VC_147_0	22	0.9414	1	3.53011	0.9414	1	1	1	1	1	1	1
Arthrobacter~phage~Kuleana	Heunggongvirae	Uroviricota	Caudoviricetes	Caudovirales	Siphoviridae	Kuleanavirus	preVC_146	Clustered	VC_146_0	6	0.8393	1	5.72905	0.8393	1	1	1	1	1	1	4
Arthrobacter~phage~Laroye	Heunggongvirae	Uroviricota	Caudoviricetes	Caudovirales	Siphoviridae	Laroyevirus	preVC_171	Clustered	VC_171_0	4	0.997	0.973761	2.77311	0.9709	1	1	1	1	1	1	1
Arthrobacter~phage~LiSara	Heunggongvirae	Uroviricota	Caudoviricetes	Caudovirales	Siphoviridae	Laroyevirus	preVC_171	Clustered	VC_171_0	4	0.997	0.973761	2.77311	0.9709	1	1	1	1	1	1	1
Arthrobacter~phage~Liebe	Heunggongvirae	Uroviricota	Caudoviricetes	Caudovirales	Siphoviridae	Liebevirus	preVC_157	Clustered	VC_157_0	4	0.532	0.99996	5.84855	0.532	1	1	1	1	1	1	4
Arthrobacter~phage~Litotes	Heunggongvirae	Uroviricota	Caudoviricetes	Caudovirales	Siphoviridae	Korravirus	preVC_147	Clustered	VC_147_0	22	0.9414	1	3.53011	0.9414	1	1	1	1	1	1	1
Arthrobacter~phage~Lymara	Heunggongvirae	Uroviricota	Caudoviricetes	Caudovirales	Myoviridae	Klausavirus	preVC_144	Clustered	VC_144_0	6	0.6084	1	4.69154	0.6084	1	1	1	1	1	1	1
Arthrobacter~phage~Maja	Heunggongvirae	Uroviricota	Caudoviricetes	Caudovirales	Siphoviridae	Majavirus	preVC_148	Clustered	VC_148_0	2	0.1143	0.881706	7.61577	0.1008	1	1	1	1	1	1	1
Arthrobacter~phage~MamaPearl	Heunggongvirae	Uroviricota	Caudoviricetes	Caudovirales	Siphoviridae	Korravirus	preVC_147	Clustered	VC_147_0	22	0.9414	1	3.53011	0.9414	1	1	1	1	1	1	1
Arthrobacter~phage~Martha	Heunggongvirae	Uroviricota	Caudoviricetes	Caudovirales	Myoviridae	Marthavirus	preVC_143	Clustered	VC_143_0	9	0.6874	1	3.18842	0.6874	1	1	1	1	1	1	1
Arthrobacter~phage~Mendel	Heunggongvirae	Uroviricota	Caudoviricetes	Caudovirales	Podoviridae	Anjalivirus		Overlap (VC_76/VC_77)
Arthrobacter~phage~Molivia	Heunggongvirae	Uroviricota	Caudoviricetes	Caudovirales	Siphoviridae	Amigovirus	preVC_153	Clustered	VC_153_0	2	0.7699	0.777778	2	0.5988	1	1	1	1	1	1	1
Arthrobacter~phage~Mudcat	Heunggongvirae	Uroviricota	Caudoviricetes	Caudovirales	Siphoviridae	Mudcatvirus		Overlap (VC_162/VC_164/VC_165)
Arthrobacter~phage~Mufasa8	Heunggongvirae	Uroviricota	Caudoviricetes	Caudovirales	Siphoviridae	Mufasoctovirus	preVC_145	Clustered	VC_145_0	2	0.869	0.812219	5.74456	0.7058	1	1	1	1	1	1	2
Arthrobacter~phage~Nubia	Heunggongvirae	Uroviricota	Caudoviricetes	Caudovirales	Siphoviridae	Korravirus	preVC_147	Clustered	VC_147_0	22	0.9414	1	3.53011	0.9414	1	1	1	1	1	1	1
Arthrobacter~phage~Oxynfrius	Heunggongvirae	Uroviricota	Caudoviricetes	Caudovirales	Siphoviridae	Korravirus	preVC_147	Clustered	VC_147_0	22	0.9414	1	3.53011	0.9414	1	1	1	1	1	1	1
Arthrobacter~phage~Peas	Heunggongvirae	Uroviricota	Caudoviricetes	Caudovirales	Siphoviridae	Bridgettevirus	preVC_159	Clustered	VC_159_0	5	0.9609	0.999876	4.63449	0.9608	1	1	1	1	1	1	1
Arthrobacter~phage~Piccoletto	Heunggongvirae	Uroviricota	Caudoviricetes	Caudovirales	Myoviridae	Marthavirus	preVC_143	Clustered	VC_143_0	9	0.6874	1	3.18842	0.6874	1	1	1	1	1	1	1
Arthrobacter~phage~Preamble	Heunggongvirae	Uroviricota	Caudoviricetes	Caudovirales	Siphoviridae	Korravirus	preVC_147	Clustered	VC_147_0	22	0.9414	1	3.53011	0.9414	1	1	1	1	1	1	1
Arthrobacter~phage~PrincessTrina	Heunggongvirae	Uroviricota	Caudoviricetes	Caudovirales	Myoviridae	Klausavirus	preVC_144	Clustered	VC_144_0	6	0.6084	1	4.69154	0.6084	1	1	1	1	1	1	1
Arthrobacter~phage~Pumancara	Heunggongvirae	Uroviricota	Caudoviricetes	Caudovirales	Siphoviridae	Korravirus	preVC_147	Clustered	VC_147_0	22	0.9414	1	3.53011	0.9414	1	1	1	1	1	1	1
Arthrobacter~phage~Salgado	Heunggongvirae	Uroviricota	Caudoviricetes	Caudovirales	Siphoviridae	Laroyevirus	preVC_171	Clustered	VC_171_0	4	0.997	0.973761	2.77311	0.9709	1	1	1	1	1	1	1
Arthrobacter~phage~Sergei	Heunggongvirae	Uroviricota	Caudoviricetes	Caudovirales	Siphoviridae	Korravirus	preVC_147	Clustered	VC_147_0	22	0.9414	1	3.53011	0.9414	1	1	1	1	1	1	1
Arthrobacter~phage~Shade	Heunggongvirae	Uroviricota	Caudoviricetes	Caudovirales	Myoviridae	Marthavirus	preVC_143	Clustered	VC_143_0	9	0.6874	1	3.18842	0.6874	1	1	1	1	1	1	1
Arthrobacter~phage~Sonali	Heunggongvirae	Uroviricota	Caudoviricetes	Caudovirales	Siphoviridae	Sonalivirus	preVC_145	Clustered	VC_145_0	2	0.869	0.812219	5.74456	0.7058	1	1	1	1	1	1	2
Arthrobacter~phage~Sonny	Heunggongvirae	Uroviricota	Caudoviricetes	Caudovirales	Myoviridae	Marthavirus	preVC_143	Clustered	VC_143_0	9	0.6874	1	3.18842	0.6874	1	1	1	1	1	1	1
Arthrobacter~phage~Tank	Heunggongvirae	Uroviricota	Caudoviricetes	Caudovirales	Siphoviridae	Tankvirus		Outlier
Arthrobacter~phage~TripleJ	Heunggongvirae	Uroviricota	Caudoviricetes	Caudovirales	Siphoviridae	Triplejayvirus	preVC_154	Clustered	VC_154_0	2	0.1522	0.899137	7.07107	0.1368	1	1	1	1	1	1	2
Arthrobacter~phage~Urla	Heunggongvirae	Uroviricota	Caudoviricetes	Caudovirales	Siphoviridae	Korravirus	preVC_147	Clustered	VC_147_0	22	0.9414	1	3.53011	0.9414	1	1	1	1	1	1	1
Arthrobacter~phage~Vibaki	Heunggongvirae	Uroviricota	Caudoviricetes	Caudovirales	Myoviridae	Vibakivirus		Outlier
Arthrobacter~phage~Wawa	Heunggongvirae	Uroviricota	Caudoviricetes	Caudovirales	Siphoviridae	Korravirus	preVC_147	Clustered	VC_147_0	22	0.9414	1	3.53011	0.9414	1	1	1	1	1	1	1
Arthrobacter~phage~Wayne	Heunggongvirae	Uroviricota	Caudoviricetes	Caudovirales	Siphoviridae	Korravirus	preVC_147	Clustered	VC_147_0	22	0.9414	1	3.53011	0.9414	1	1	1	1	1	1	1
Arthrobacter~phage~Wheelbite	Heunggongvirae	Uroviricota	Caudoviricetes	Caudovirales	Siphoviridae	Laroyevirus	preVC_171	Clustered	VC_171_0	4	0.997	0.973761	2.77311	0.9709	1	1	1	1	1	1	1
Arthrobacter~phage~Yang	Heunggongvirae	Uroviricota	Caudoviricetes	Caudovirales	Siphoviridae	Yangvirus	preVC_157	Clustered	VC_157_0	4	0.532	0.99996	5.84855	0.532	1	1	1	1	1	1	4
Arthrobacter~phage~Zartrosa	Heunggongvirae	Uroviricota	Caudoviricetes	Caudovirales	Myoviridae	Marthavirus	preVC_143	Clustered	VC_143_0	9	0.6874	1	3.18842	0.6874	1	1	1	1	1	1	1
Arthrobacter~phage~vB_ArS-ArV2	Heunggongvirae	Uroviricota	Caudoviricetes	Caudovirales	Siphoviridae	Unassigned	preVC_148	Clustered	VC_148_0	2	0.1143	0.881706	7.61577	0.1008	1	1	1	1	1	1	1
Arthrobacter~phage~vB_ArtM-ArV1	Heunggongvirae	Uroviricota	Caudoviricetes	Caudovirales	Myoviridae	Klausavirus	preVC_144	Clustered	VC_144_0	6	0.6084	1	4.69154	0.6084	1	1	1	1	1	1	1
Aurantimonas~phage~AmM-1	Heunggongvirae	Uroviricota	Caudoviricetes	Caudovirales	Myoviridae	Unassigned		Outlier
Azobacteroides~phage~ProJPt-Bp1	Heunggongvirae	Uroviricota	Caudoviricetes	Caudovirales	Podoviridae	Unassigned		Singleton
Azospirillum~phage~Cd	Heunggongvirae	Uroviricota	Caudoviricetes	Caudovirales	Siphoviridae	Unassigned		Singleton
Bacillus~phage~0305phi8-36	Heunggongvirae	Uroviricota	Caudoviricetes	Caudovirales	Myoviridae	Unassigned		Singleton
Bacillus~phage~250	Heunggongvirae	Uroviricota	Caudoviricetes	Caudovirales	Siphoviridae	Cecivirus		Overlap (VC_208/VC_209/VC_211)
Bacillus~phage~AR9	Heunggongvirae	Uroviricota	Caudoviricetes	Caudovirales	Myoviridae	Takahashivirus	preVC_215	Clustered	VC_215_0	2	0.7161	0.333333	1.41421	0.2387	1	1	1	1	1	1	1
Bacillus~phage~Andromeda	Heunggongvirae	Uroviricota	Caudoviricetes	Caudovirales	Siphoviridae	Andromedavirus	preVC_216	Clustered	VC_216_0	8	1	0	3.77229	0	1	1	1	1	1	1	1
Bacillus~phage~Aurora	Heunggongvirae	Uroviricota	Caudoviricetes	Caudovirales	Salasmaviridae	Claudivirus	preVC_77	Clustered	VC_77_0	15	0.7867	1	3.98305	0.7867	1	1	1	1	1	1	3
Bacillus~phage~AvesoBmore	Heunggongvirae	Uroviricota	Caudoviricetes	Caudovirales	Herelleviridae	Bequatrovirus		Overlap (VC_218/VC_219)
Bacillus~phage~B4	Heunggongvirae	Uroviricota	Caudoviricetes	Caudovirales	Herelleviridae	Bequatrovirus		Overlap (VC_218/VC_219)
Bacillus~phage~B5S	Heunggongvirae	Uroviricota	Caudoviricetes	Caudovirales	Herelleviridae	Bequatrovirus		Overlap (VC_218/VC_219)
Bacillus~phage~BCD7	Heunggongvirae	Uroviricota	Caudoviricetes	Caudovirales	Myoviridae	Becedseptimavirus	preVC_229	Clustered	VC_229_0	2	0.7425	0	8.42615	0	1	1	1	1	1	1	2
Bacillus~phage~BCP78	Heunggongvirae	Uroviricota	Caudoviricetes	Caudovirales	Herelleviridae	Tsarbombavirus	preVC_217	Clustered	VC_217_0	3	0.0509	0.996951	5.52603	0.0508	1	1	1	1	1	1	1
Bacillus~phage~BCP8-2	Heunggongvirae	Uroviricota	Caudoviricetes	Caudovirales	Herelleviridae	Caeruleovirus	preVC_217	Clustered	VC_217_4	2	0.0251	0.889751	6.9282	0.0224	1	1	1	1	1	1	1
Bacillus~phage~BCU4	Heunggongvirae	Uroviricota	Caudoviricetes	Caudovirales	Herelleviridae	Tsarbombavirus	preVC_217	Clustered	VC_217_0	3	0.0509	0.996951	5.52603	0.0508	1	1	1	1	1	1	1
Bacillus~phage~BPS10C	Heunggongvirae	Uroviricota	Caudoviricetes	Caudovirales	Herelleviridae	Wphvirus	preVC_218	Clustered	VC_218_1	4	0.0696	0.998474	7.09219	0.0695	1	1	1	1	1	1	1
Bacillus~phage~BPS13	Heunggongvirae	Uroviricota	Caudoviricetes	Caudovirales	Herelleviridae	Wphvirus	preVC_218	Clustered	VC_218_1	4	0.0696	0.998474	7.09219	0.0695	1	1	1	1	1	1	1
Bacillus~phage~BSP38	Heunggongvirae	Uroviricota	Caudoviricetes	Caudovirales	Herelleviridae	Jeonjuvirus	preVC_217	Clustered	VC_217_3	2	0.0292	0.90393	8.7178	0.0264	1	1	1	1	1	1	2
Bacillus~phage~BalMu-1	Heunggongvirae	Uroviricota	Caudoviricetes	Caudovirales	Myoviridae	Unassigned	preVC_232	Clustered	VC_232_0	2	0.04	0.722013	6.78233	0.0289	1	1	1	1	1	1	1
Bacillus~phage~Baseball_field	Heunggongvirae	Uroviricota	Caudoviricetes	Caudovirales	Salasmaviridae	Claudivirus	preVC_77	Clustered	VC_77_0	15	0.7867	1	3.98305	0.7867	1	1	1	1	1	1	3
Bacillus~phage~Bastille	Heunggongvirae	Uroviricota	Caudoviricetes	Caudovirales	Herelleviridae	Bastillevirus		Overlap (VC_218/VC_219)
Bacillus~phage~BceA1	Heunggongvirae	Uroviricota	Caudoviricetes	Caudovirales	Siphoviridae	Beceayunavirus		Overlap (VC_87/VC_212)
Bacillus~phage~Bcp1	Heunggongvirae	Uroviricota	Caudoviricetes	Caudovirales	Herelleviridae	Caeruleovirus	preVC_217	Clustered	VC_217_5	4	0.0786	0.999947	7.85728	0.0786	1	1	1	1	1	1	1
Bacillus~phage~BeachBum	Heunggongvirae	Uroviricota	Caudoviricetes	Caudovirales	Salasmaviridae	Harambevirus		Overlap (VC_79/VC_81)
Bacillus~phage~Belinda	Heunggongvirae	Uroviricota	Caudoviricetes	Caudovirales	Herelleviridae	Wphvirus	preVC_218	Clustered	VC_218_0	12	0.3114	1	5.62195	0.3114	1	1	1	1	1	1	1
Bacillus~phage~BigBertha	Heunggongvirae	Uroviricota	Caudoviricetes	Caudovirales	Herelleviridae	Bequatrovirus		Overlap (VC_218/VC_219)
Bacillus~phage~Blastoid	Heunggongvirae	Uroviricota	Caudoviricetes	Caudovirales	Siphoviridae	Andromedavirus	preVC_216	Clustered	VC_216_0	8	1	0	3.77229	0	1	1	1	1	1	1	1
Bacillus~phage~Bobb	Heunggongvirae	Uroviricota	Caudoviricetes	Caudovirales	Herelleviridae	Agatevirus	preVC_217	Clustered	VC_217_6	3	0.0644	0.996503	4.85341	0.0642	1	1	1	1	1	1	1
Bacillus~phage~Bp8p-C	Heunggongvirae	Uroviricota	Caudoviricetes	Caudovirales	Herelleviridae	Agatevirus	preVC_217	Clustered	VC_217_6	3	0.0644	0.996503	4.85341	0.0642	1	1	1	1	1	1	1
Bacillus~phage~Bp8p-T	Heunggongvirae	Uroviricota	Caudoviricetes	Caudovirales	Herelleviridae	Agatevirus	preVC_217	Clustered	VC_217_6	3	0.0644	0.996503	4.85341	0.0642	1	1	1	1	1	1	1
Bacillus~phage~BtCS33	Heunggongvirae	Uroviricota	Caudoviricetes	Caudovirales	Siphoviridae	Camtrevirus		Overlap (VC_210/VC_212)
Bacillus~phage~CAM003	Heunggongvirae	Uroviricota	Caudoviricetes	Caudovirales	Herelleviridae	Bastillevirus		Overlap (VC_218/VC_219)
Bacillus~phage~CP-51	Heunggongvirae	Uroviricota	Caudoviricetes	Caudovirales	Herelleviridae	Siminovitchvirus		Overlap (VC_220/VC_237)
Bacillus~phage~CampHawk	Heunggongvirae	Uroviricota	Caudoviricetes	Caudovirales	Herelleviridae	Okubovirus	preVC_219	Clustered	VC_219_0	2	0.2361	0.909189	2.44949	0.2146	1	1	1	1	1	1	1
Bacillus~phage~Claudi	Heunggongvirae	Uroviricota	Caudoviricetes	Caudovirales	Salasmaviridae	Claudivirus	preVC_77	Clustered	VC_77_0	15	0.7867	1	3.98305	0.7867	1	1	1	1	1	1	3
Bacillus~phage~Curly	Heunggongvirae	Uroviricota	Caudoviricetes	Caudovirales	Siphoviridae	Andromedavirus	preVC_216	Clustered	VC_216_0	8	1	0	3.77229	0	1	1	1	1	1	1	1
Bacillus~phage~DIGNKC	Heunggongvirae	Uroviricota	Caudoviricetes	Caudovirales	Herelleviridae	Wphvirus	preVC_218	Clustered	VC_218_0	12	0.3114	1	5.62195	0.3114	1	1	1	1	1	1	1
Bacillus~phage~DK1	Heunggongvirae	Uroviricota	Caudoviricetes	Caudovirales	Salasmaviridae	Hemphillvirus	preVC_77	Clustered	VC_77_0	15	0.7867	1	3.98305	0.7867	1	1	1	1	1	1	3
Bacillus~phage~DK2	Heunggongvirae	Uroviricota	Caudoviricetes	Caudovirales	Salasmaviridae	Hemphillvirus	preVC_77	Clustered	VC_77_0	15	0.7867	1	3.98305	0.7867	1	1	1	1	1	1	3
Bacillus~phage~DK3	Heunggongvirae	Uroviricota	Caudoviricetes	Caudovirales	Salasmaviridae	Hemphillvirus	preVC_77	Clustered	VC_77_0	15	0.7867	1	3.98305	0.7867	1	1	1	1	1	1	3
Bacillus~phage~DLc1	Heunggongvirae	Uroviricota	Caudoviricetes	Caudovirales	Salasmaviridae	Unassigned	preVC_77	Clustered	VC_77_0	15	0.7867	1	3.98305	0.7867	1	1	1	1	1	1	3
Bacillus~phage~Deep-Purple	Heunggongvirae	Uroviricota	Caudoviricetes	Caudovirales	Siphoviridae	Deurplevirus		Outlier
Bacillus~phage~Deep~Blue	Heunggongvirae	Uroviricota	Caudoviricetes	Caudovirales	Herelleviridae	Caeruleovirus	preVC_217	Clustered	VC_217_5	4	0.0786	0.999947	7.85728	0.0786	1	1	1	1	1	1	1
Bacillus~phage~DirtyBetty	Heunggongvirae	Uroviricota	Caudoviricetes	Caudovirales	Herelleviridae	Wphvirus	preVC_218	Clustered	VC_218_0	12	0.3114	1	5.62195	0.3114	1	1	1	1	1	1	1
Bacillus~phage~Eldridge	Heunggongvirae	Uroviricota	Caudoviricetes	Caudovirales	Herelleviridae	Eldridgevirus	preVC_217	Clustered	VC_217_8	2	0.0304	0.912179	9	0.0277	0	1	1	1	1	1	2
Bacillus~phage~Eoghan	Heunggongvirae	Uroviricota	Caudoviricetes	Caudovirales	Siphoviridae	Andromedavirus	preVC_216	Clustered	VC_216_0	8	1	0	3.77229	0	1	1	1	1	1	1	1
Bacillus~phage~Evoli	Heunggongvirae	Uroviricota	Caudoviricetes	Caudovirales	Herelleviridae	Bastillevirus		Overlap (VC_218/VC_219)
Bacillus~phage~Eyuki	Heunggongvirae	Uroviricota	Caudoviricetes	Caudovirales	Herelleviridae	Wphvirus	preVC_218	Clustered	VC_218_0	12	0.3114	1	5.62195	0.3114	1	1	1	1	1	1	1
Bacillus~phage~Fah	Heunggongvirae	Uroviricota	Caudoviricetes	Caudovirales	Siphoviridae	Wbetavirus	preVC_209	Clustered	VC_209_0	3	0.3714	0.99629	2.79371	0.3701	1	1	1	1	1	1	1
Bacillus~phage~Finn	Heunggongvirae	Uroviricota	Caudoviricetes	Caudovirales	Siphoviridae	Andromedavirus	preVC_216	Clustered	VC_216_0	8	1	0	3.77229	0	1	1	1	1	1	1	1
Bacillus~phage~G	Heunggongvirae	Uroviricota	Caudoviricetes	Caudovirales	Myoviridae	Donellivirus	preVC_244	Clustered/Singleton	VC_244_0	1	0	0	0	0	1	1	1	1	1	1	1
Bacillus~phage~GA1	Heunggongvirae	Uroviricota	Caudoviricetes	Caudovirales	Salasmaviridae	Gaunavirus		Overlap (VC_80/VC_81)
Bacillus~phage~Gamma	Heunggongvirae	Uroviricota	Caudoviricetes	Caudovirales	Siphoviridae	Wbetavirus	preVC_209	Clustered	VC_209_0	3	0.3714	0.99629	2.79371	0.3701	1	1	1	1	1	1	1
Bacillus~phage~Glittering	Heunggongvirae	Uroviricota	Caudoviricetes	Caudovirales	Siphoviridae	Andromedavirus	preVC_216	Clustered	VC_216_0	8	1	0	3.77229	0	1	1	1	1	1	1	1
Bacillus~phage~Grass	Heunggongvirae	Uroviricota	Caudoviricetes	Caudovirales	Herelleviridae	Nitunavirus	preVC_217	Clustered	VC_217_2	2	0.0304	0.90277	8.30662	0.0275	1	1	1	1	1	1	1
Bacillus~phage~Gxv1	Heunggongvirae	Uroviricota	Caudoviricetes	Caudovirales	Salasmaviridae	Salasvirus	preVC_80	Clustered	VC_80_0	7	0.3899	1	2.58442	0.3899	1	1	1	1	1	1	2
Bacillus~phage~Hakuna	Heunggongvirae	Uroviricota	Caudoviricetes	Caudovirales	Herelleviridae	Wphvirus	preVC_218	Clustered	VC_218_0	12	0.3114	1	5.62195	0.3114	1	1	1	1	1	1	1
Bacillus~phage~Harambe	Heunggongvirae	Uroviricota	Caudoviricetes	Caudovirales	Salasmaviridae	Harambevirus		Overlap (VC_79/VC_81)
Bacillus~phage~Hoody~T	Heunggongvirae	Uroviricota	Caudoviricetes	Caudovirales	Herelleviridae	Bastillevirus		Overlap (VC_218/VC_219)
Bacillus~phage~IEBH	Heunggongvirae	Uroviricota	Caudoviricetes	Caudovirales	Siphoviridae	Cecivirus		Overlap (VC_208/VC_209/VC_211)
Bacillus~phage~JBP901	Heunggongvirae	Uroviricota	Caudoviricetes	Caudovirales	Herelleviridae	Caeruleovirus	preVC_217	Clustered	VC_217_4	2	0.0251	0.889751	6.9282	0.0224	1	1	1	1	1	1	1
Bacillus~phage~JL	Heunggongvirae	Uroviricota	Caudoviricetes	Caudovirales	Herelleviridae	Siminovitchvirus		Overlap (VC_220/VC_237)
Bacillus~phage~Juan	Heunggongvirae	Uroviricota	Caudoviricetes	Caudovirales	Salasmaviridae	Claudivirus	preVC_77	Clustered	VC_77_0	15	0.7867	1	3.98305	0.7867	1	1	1	1	1	1	3
Bacillus~phage~Karezi	Heunggongvirae	Uroviricota	Caudoviricetes	Caudovirales	Salasmaviridae	Karezivirus		Overlap (VC_80/VC_81)
Bacillus~phage~Kida	Heunggongvirae	Uroviricota	Caudoviricetes	Caudovirales	Herelleviridae	Wphvirus	preVC_218	Clustered	VC_218_0	12	0.3114	1	5.62195	0.3114	1	1	1	1	1	1	1
Bacillus~phage~KonjoTrouble	Heunggongvirae	Uroviricota	Caudoviricetes	Caudovirales	Salasmaviridae	Claudivirus	preVC_77	Clustered	VC_77_0	15	0.7867	1	3.98305	0.7867	1	1	1	1	1	1	3
Bacillus~phage~MG-B1	Heunggongvirae	Uroviricota	Caudoviricetes	Caudovirales	Salasmaviridae	Klosterneuburgvirus	preVC_77	Clustered	VC_77_0	15	0.7867	1	3.98305	0.7867	1	1	1	1	1	1	3
Bacillus~phage~Mater	Heunggongvirae	Uroviricota	Caudoviricetes	Caudovirales	Herelleviridae	Matervirus	preVC_217	Clustered/Singleton	VC_217_9	1	0	0	0	0	1	1	1	1	1	1	1
Bacillus~phage~Megatron	Heunggongvirae	Uroviricota	Caudoviricetes	Caudovirales	Herelleviridae	Wphvirus	preVC_218	Clustered	VC_218_0	12	0.3114	1	5.62195	0.3114	1	1	1	1	1	1	1
Bacillus~phage~Mgbh1	Heunggongvirae	Uroviricota	Caudoviricetes	Caudovirales	Siphoviridae	Magadivirus		Outlier
Bacillus~phage~Moonbeam	Heunggongvirae	Uroviricota	Caudoviricetes	Caudovirales	Herelleviridae	Moonbeamvirus	preVC_217	Clustered	VC_217_8	2	0.0304	0.912179	9	0.0277	0	1	1	1	1	1	2
Bacillus~phage~Nemo	Heunggongvirae	Uroviricota	Caudoviricetes	Caudovirales	Herelleviridae	Wphvirus	preVC_218	Clustered	VC_218_0	12	0.3114	1	5.62195	0.3114	1	1	1	1	1	1	1
Bacillus~phage~Nf	Heunggongvirae	Uroviricota	Caudoviricetes	Caudovirales	Salasmaviridae	Beecentumtrevirus	preVC_80	Clustered	VC_80_0	7	0.3899	1	2.58442	0.3899	1	1	1	1	1	1	2
Bacillus~phage~Nigalana	Heunggongvirae	Uroviricota	Caudoviricetes	Caudovirales	Herelleviridae	Wphvirus	preVC_218	Clustered	VC_218_0	12	0.3114	1	5.62195	0.3114	1	1	1	1	1	1	1
Bacillus~phage~NotTheCreek	Heunggongvirae	Uroviricota	Caudoviricetes	Caudovirales	Herelleviridae	Wphvirus	preVC_218	Clustered	VC_218_0	12	0.3114	1	5.62195	0.3114	1	1	1	1	1	1	1
Bacillus~phage~PBS1	Heunggongvirae	Uroviricota	Caudoviricetes	Caudovirales	Myoviridae	Takahashivirus	preVC_215	Clustered	VC_215_0	2	0.7161	0.333333	1.41421	0.2387	1	1	1	1	1	1	1
Bacillus~phage~PM1	Heunggongvirae	Uroviricota	Caudoviricetes	Caudovirales	Myoviridae	Pemunavirus	preVC_247	Clustered	VC_247_0	3	0.3662	0.822222	8.06973	0.3011	1	1	1	1	1	2	2
Bacillus~phage~PZA	Heunggongvirae	Uroviricota	Caudoviricetes	Caudovirales	Salasmaviridae	Salasvirus	preVC_80	Clustered	VC_80_0	7	0.3899	1	2.58442	0.3899	1	1	1	1	1	1	2
Bacillus~phage~Page	Heunggongvirae	Uroviricota	Caudoviricetes	Caudovirales	Podoviridae	Pagevirus	preVC_87	Clustered	VC_87_0	6	0.9818	0.999992	2.74102	0.9818	1	1	1	1	1	1	1
Bacillus~phage~Palmer	Heunggongvirae	Uroviricota	Caudoviricetes	Caudovirales	Podoviridae	Pagevirus	preVC_87	Clustered	VC_87_0	6	0.9818	0.999992	2.74102	0.9818	1	1	1	1	1	1	1
Bacillus~phage~Pascal	Heunggongvirae	Uroviricota	Caudoviricetes	Caudovirales	Podoviridae	Pagevirus	preVC_87	Clustered	VC_87_0	6	0.9818	0.999992	2.74102	0.9818	1	1	1	1	1	1	1
Bacillus~phage~Pavlov	Heunggongvirae	Uroviricota	Caudoviricetes	Caudovirales	Podoviridae	Pagevirus	preVC_87	Clustered	VC_87_0	6	0.9818	0.999992	2.74102	0.9818	1	1	1	1	1	1	1
Bacillus~phage~PfEFR-4	Heunggongvirae	Uroviricota	Caudoviricetes	Caudovirales	Siphoviridae	Hubeivirus	preVC_210	Clustered	VC_210_0	3	0.2804	0.996705	4.015	0.2795	1	1	1	1	1	1	1
Bacillus~phage~PfEFR-5	Heunggongvirae	Uroviricota	Caudoviricetes	Caudovirales	Siphoviridae	Hubeivirus	preVC_210	Clustered	VC_210_0	3	0.2804	0.996705	4.015	0.2795	1	1	1	1	1	1	1
Bacillus~phage~Phrodo	Heunggongvirae	Uroviricota	Caudoviricetes	Caudovirales	Herelleviridae	Bequatrovirus		Overlap (VC_218/VC_219)
Bacillus~phage~Pony	Heunggongvirae	Uroviricota	Caudoviricetes	Caudovirales	Podoviridae	Pagevirus	preVC_87	Clustered	VC_87_0	6	0.9818	0.999992	2.74102	0.9818	1	1	1	1	1	1	1
Bacillus~phage~Pookie	Heunggongvirae	Uroviricota	Caudoviricetes	Caudovirales	Podoviridae	Pagevirus	preVC_87	Clustered	VC_87_0	6	0.9818	0.999992	2.74102	0.9818	1	1	1	1	1	1	1
Bacillus~phage~QCM11	Heunggongvirae	Uroviricota	Caudoviricetes	Caudovirales	Salasmaviridae	Claudivirus	preVC_77	Clustered	VC_77_0	15	0.7867	1	3.98305	0.7867	1	1	1	1	1	1	3
Bacillus~phage~Riggi	Heunggongvirae	Uroviricota	Caudoviricetes	Caudovirales	Siphoviridae	Andromedavirus	preVC_216	Clustered	VC_216_0	8	1	0	3.77229	0	1	1	1	1	1	1	1
Bacillus~phage~Riley	Heunggongvirae	Uroviricota	Caudoviricetes	Caudovirales	Herelleviridae	Bequatrovirus		Overlap (VC_218/VC_219)
Bacillus~phage~SIOphi	Heunggongvirae	Uroviricota	Caudoviricetes	Caudovirales	Herelleviridae	Siophivirus	preVC_217	Clustered/Singleton	VC_217_11	1	0	0	0	0	1	1	1	1	1	1	1
Bacillus~phage~SP-10	Heunggongvirae	Uroviricota	Caudoviricetes	Caudovirales	Herelleviridae	Unassigned		Outlier
Bacillus~phage~SP-15	Heunggongvirae	Uroviricota	Caudoviricetes	Caudovirales	Myoviridae	Thornevirus	preVC_244	Clustered/Singleton	VC_244_1	1	0	0	0	0	1	1	1	1	1	1	1
Bacillus~phage~SPG24	Heunggongvirae	Uroviricota	Caudoviricetes	Caudovirales	Herelleviridae	Nitunavirus		Outlier
Bacillus~phage~SPO1	Heunggongvirae	Uroviricota	Caudoviricetes	Caudovirales	Herelleviridae	Okubovirus	preVC_219	Clustered	VC_219_0	2	0.2361	0.909189	2.44949	0.2146	1	1	1	1	1	1	1
Bacillus~phage~SPP1	Heunggongvirae	Uroviricota	Caudoviricetes	Caudovirales	Siphoviridae	Unassigned		Outlier
Bacillus~phage~SageFayge	Heunggongvirae	Uroviricota	Caudoviricetes	Caudovirales	Herelleviridae	Wphvirus	preVC_218	Clustered	VC_218_0	12	0.3114	1	5.62195	0.3114	1	1	1	1	1	1	1
Bacillus~phage~SalinJah	Heunggongvirae	Uroviricota	Caudoviricetes	Caudovirales	Herelleviridae	Wphvirus	preVC_218	Clustered	VC_218_1	4	0.0696	0.998474	7.09219	0.0695	1	1	1	1	1	1	1
Bacillus~phage~SerPounce	Heunggongvirae	Uroviricota	Caudoviricetes	Caudovirales	Salasmaviridae	Claudivirus	preVC_77	Clustered	VC_77_0	15	0.7867	1	3.98305	0.7867	1	1	1	1	1	1	3
Bacillus~phage~Shanette	Heunggongvirae	Uroviricota	Caudoviricetes	Caudovirales	Herelleviridae	Siminovitchvirus		Overlap (VC_220/VC_237)
Bacillus~phage~Shbh1	Heunggongvirae	Uroviricota	Caudoviricetes	Caudovirales	Herelleviridae	Shalavirus	preVC_217	Clustered/Singleton	VC_217_1	1	0	0	0	0	1	1	1	1	1	1	1
Bacillus~phage~Slash	Heunggongvirae	Uroviricota	Caudoviricetes	Caudovirales	Siphoviridae	Slashvirus	preVC_251	Clustered	VC_251_0	4	0.9955	0.990476	4.28187	0.986	1	1	1	1	1	1	1
Bacillus~phage~Spock	Heunggongvirae	Uroviricota	Caudoviricetes	Caudovirales	Herelleviridae	Bequatrovirus		Overlap (VC_218/VC_219)
Bacillus~phage~Stahl	Heunggongvirae	Uroviricota	Caudoviricetes	Caudovirales	Siphoviridae	Slashvirus	preVC_251	Clustered	VC_251_0	4	0.9955	0.990476	4.28187	0.986	1	1	1	1	1	1	1
Bacillus~phage~Staley	Heunggongvirae	Uroviricota	Caudoviricetes	Caudovirales	Siphoviridae	Slashvirus	preVC_251	Clustered	VC_251_0	4	0.9955	0.990476	4.28187	0.986	1	1	1	1	1	1	1
Bacillus~phage~Stills	Heunggongvirae	Uroviricota	Caudoviricetes	Caudovirales	Siphoviridae	Slashvirus	preVC_251	Clustered	VC_251_0	4	0.9955	0.990476	4.28187	0.986	1	1	1	1	1	1	1
Bacillus~phage~Stitch	Heunggongvirae	Uroviricota	Caudoviricetes	Caudovirales	Salasmaviridae	Claudivirus	preVC_77	Clustered	VC_77_0	15	0.7867	1	3.98305	0.7867	1	1	1	1	1	1	3
Bacillus~phage~TP21-L	Heunggongvirae	Uroviricota	Caudoviricetes	Caudovirales	Siphoviridae	Lwoffvirus	preVC_234	Clustered	VC_234_0	2	0.79	0.6	2.23607	0.474	1	1	1	1	1	1	1
Bacillus~phage~Taylor	Heunggongvirae	Uroviricota	Caudoviricetes	Caudovirales	Siphoviridae	Andromedavirus	preVC_216	Clustered	VC_216_0	8	1	0	3.77229	0	1	1	1	1	1	1	1
Bacillus~phage~Thornton	Heunggongvirae	Uroviricota	Caudoviricetes	Caudovirales	Salasmaviridae	Claudivirus	preVC_77	Clustered	VC_77_0	15	0.7867	1	3.98305	0.7867	1	1	1	1	1	1	3
Bacillus~phage~Troll	Heunggongvirae	Uroviricota	Caudoviricetes	Caudovirales	Herelleviridae	Bequatrovirus		Overlap (VC_218/VC_219)
Bacillus~phage~TsarBomba	Heunggongvirae	Uroviricota	Caudoviricetes	Caudovirales	Herelleviridae	Tsarbombavirus	preVC_217	Clustered	VC_217_0	3	0.0509	0.996951	5.52603	0.0508	1	1	1	1	1	1	1
Bacillus~phage~VMY22	Heunggongvirae	Uroviricota	Caudoviricetes	Caudovirales	Salasmaviridae	Mingyongvirus		Overlap (VC_79/VC_81)
Bacillus~phage~W.Ph.	Heunggongvirae	Uroviricota	Caudoviricetes	Caudovirales	Herelleviridae	Wphvirus	preVC_218	Clustered	VC_218_1	4	0.0696	0.998474	7.09219	0.0695	1	1	1	1	1	1	1
Bacillus~phage~WBeta	Heunggongvirae	Uroviricota	Caudoviricetes	Caudovirales	Siphoviridae	Wbetavirus	preVC_209	Clustered	VC_209_0	3	0.3714	0.99629	2.79371	0.3701	1	1	1	1	1	1	1
Bacillus~phage~Waukesha92	Heunggongvirae	Uroviricota	Caudoviricetes	Caudovirales	Siphoviridae	Waukeshavirus		Overlap (VC_87/VC_212)
Bacillus~phage~WhyPhy	Heunggongvirae	Uroviricota	Caudoviricetes	Caudovirales	Salasmaviridae	Bundooravirus		Overlap (VC_80/VC_81)
Bacillus~phage~Zuko	Heunggongvirae	Uroviricota	Caudoviricetes	Caudovirales	Herelleviridae	Wphvirus	preVC_218	Clustered	VC_218_0	12	0.3114	1	5.62195	0.3114	1	1	1	1	1	1	1
Bacillus~phage~phBC6A51	Heunggongvirae	Uroviricota	Caudoviricetes	Caudovirales	Siphoviridae	Unassigned		Overlap (VC_232/VC_233)
Bacillus~phage~phBC6A52	Heunggongvirae	Uroviricota	Caudoviricetes	Caudovirales	Siphoviridae	Unassigned		Outlier
Bacillus~phage~phIS3501	Heunggongvirae	Uroviricota	Caudoviricetes	Caudovirales	Siphoviridae	Camtrevirus		Overlap (VC_210/VC_212)
Bacillus~phage~phi105	Heunggongvirae	Uroviricota	Caudoviricetes	Caudovirales	Siphoviridae	Spizizenvirus		Outlier
Bacillus~phage~phi29	Heunggongvirae	Uroviricota	Caudoviricetes	Caudovirales	Salasmaviridae	Salasvirus	preVC_80	Clustered	VC_80_0	7	0.3899	1	2.58442	0.3899	1	1	1	1	1	1	2
Bacillus~phage~phi4B1	Heunggongvirae	Uroviricota	Caudoviricetes	Caudovirales	Siphoviridae	Unassigned		Outlier
Bacillus~phage~phi4J1	Heunggongvirae	Uroviricota	Caudoviricetes	Caudovirales	Siphoviridae	Rockvillevirus		Overlap (VC_87/VC_212)
Bacillus~phage~phiAGATE	Heunggongvirae	Uroviricota	Caudoviricetes	Caudovirales	Herelleviridae	Agatevirus	preVC_217	Clustered/Singleton	VC_217_7	1	0	0	0	0	1	1	1	1	1	1	1
Bacillus~phage~phiCM3	Heunggongvirae	Uroviricota	Caudoviricetes	Caudovirales	Siphoviridae	Camtrevirus		Overlap (VC_210/VC_212)
Bacillus~phage~phiNIT1	Heunggongvirae	Uroviricota	Caudoviricetes	Caudovirales	Herelleviridae	Nitunavirus	preVC_217	Clustered	VC_217_2	2	0.0304	0.90277	8.30662	0.0275	1	1	1	1	1	1	1
Bacillus~phage~vB_BanS-Tsamsa	Heunggongvirae	Uroviricota	Caudoviricetes	Caudovirales	Siphoviridae	Unassigned		Outlier
Bacillus~phage~vB_BboS-125	Heunggongvirae	Uroviricota	Caudoviricetes	Caudovirales	Myoviridae	Elmenteitavirus		Overlap (VC_232/VC_233)
Bacillus~phage~vB_BceM_Bc431v3	Heunggongvirae	Uroviricota	Caudoviricetes	Caudovirales	Herelleviridae	Caeruleovirus	preVC_217	Clustered	VC_217_5	4	0.0786	0.999947	7.85728	0.0786	1	1	1	1	1	1	1
Bacillus~phage~vB_BceS-MY192	Heunggongvirae	Uroviricota	Caudoviricetes	Caudovirales	Siphoviridae	Hubeivirus	preVC_210	Clustered	VC_210_0	3	0.2804	0.996705	4.015	0.2795	1	1	1	1	1	1	1
Bacillus~phage~vB_BhaS-171	Heunggongvirae	Uroviricota	Caudoviricetes	Caudovirales	Siphoviridae	Unassigned		Outlier
Bacillus~phage~vB_BmeM-Goe8	Heunggongvirae	Uroviricota	Caudoviricetes	Caudovirales	Herelleviridae	Goettingenvirus	preVC_217	Clustered/Singleton	VC_217_10	1	0	0	0	0	1	1	1	1	1	1	1
Bacillus~phage~vB_Bpu_PumA1	Heunggongvirae	Uroviricota	Caudoviricetes	Caudovirales	Salasmaviridae	Bundooravirus		Overlap (VC_80/VC_81)
Bacillus~phage~vB_Bpu_PumA2	Heunggongvirae	Uroviricota	Caudoviricetes	Caudovirales	Salasmaviridae	Bundooravirus		Overlap (VC_80/VC_81)
Bacillus~phage~vB_BsuM-Goe3	Heunggongvirae	Uroviricota	Caudoviricetes	Caudovirales	Herelleviridae	Grisebachstrassevirus	preVC_217	Clustered	VC_217_3	2	0.0292	0.90393	8.7178	0.0264	1	1	1	1	1	1	2
Bacillus~phage~vB_BtS_B83	Heunggongvirae	Uroviricota	Caudoviricetes	Caudovirales	Siphoviridae	Pushchinovirus	preVC_212	Clustered	VC_212_0	2	0.565	0.885128	5.2915	0.5001	1	1	1	1	1	1	2
Bacillus~phage~vB_BtS_BMBtp14	Heunggongvirae	Uroviricota	Caudoviricetes	Caudovirales	Siphoviridae	Bembunaquatrovirus	preVC_212	Clustered	VC_212_0	2	0.565	0.885128	5.2915	0.5001	1	1	1	1	1	1	2
Bacillus~phage~vB_BtS_BMBtp2	Heunggongvirae	Uroviricota	Caudoviricetes	Caudovirales	Siphoviridae	Lwoffvirus	preVC_234	Clustered	VC_234_0	2	0.79	0.6	2.23607	0.474	1	1	1	1	1	1	1
Bacillus~phage~vB_BtS_BMBtp3	Heunggongvirae	Uroviricota	Caudoviricetes	Caudovirales	Siphoviridae	Waukeshavirus		Overlap (VC_87/VC_212)
Bacillus~phage~vB_BthP-Goe4	Heunggongvirae	Uroviricota	Caudoviricetes	Caudovirales	Salasmaviridae	Claudivirus	preVC_77	Clustered	VC_77_0	15	0.7867	1	3.98305	0.7867	1	1	1	1	1	1	3
Bacillus~phage~vB_BveP-Goe6	Heunggongvirae	Uroviricota	Caudoviricetes	Caudovirales	Salasmaviridae	Salasvirus	preVC_80	Clustered	VC_80_0	7	0.3899	1	2.58442	0.3899	1	1	1	1	1	1	2
Bacillus~virus~1	Heunggongvirae	Uroviricota	Caudoviricetes	Caudovirales	Myoviridae	Svunavirus	preVC_135	Clustered	VC_135_0	2	0.4372	0.87789	4.12311	0.3838	1	1	1	1	1	1	1
Bacillus~virus~BM15	Heunggongvirae	Uroviricota	Caudoviricetes	Caudovirales	Herelleviridae	Caeruleovirus	preVC_217	Clustered	VC_217_5	4	0.0786	0.999947	7.85728	0.0786	1	1	1	1	1	1	1
Bacillus~virus~SPbeta	Heunggongvirae	Uroviricota	Caudoviricetes	Caudovirales	Siphoviridae	Spbetavirus	preVC_220	Clustered/Singleton	VC_220_2	1	0	0	0	0	1	1	1	1	1	1	1
Bacillus~virus~SRT01hs	Heunggongvirae	Uroviricota	Caudoviricetes	Caudovirales	Salasmaviridae	Gaunavirus		Overlap (VC_80/VC_81)
Bacteriophage~APSE-2	Heunggongvirae	Uroviricota	Caudoviricetes	Caudovirales	Podoviridae	Sendosyvirus	preVC_259	Clustered	VC_259_0	2	0.1222	0.906686	2.64575	0.1108	1	1	1	1	1	1	1
Bacteriophage~DSS3_VP1	Heunggongvirae	Uroviricota	Caudoviricetes	Caudovirales	Siphoviridae	Unassigned		Singleton
Bacteriophage~K139	Heunggongvirae	Uroviricota	Caudoviricetes	Caudovirales	Myoviridae	Longwoodvirus	preVC_125	Clustered	VC_125_0	20	0.9706	1	5.56846	0.9706	1	1	1	1	1	1	12
Bacteriophage~Lily	Heunggongvirae	Uroviricota	Caudoviricetes	Caudovirales	Unassigned	Lilyvirus		Outlier
Bacteriophage~P2	Heunggongvirae	Uroviricota	Caudoviricetes	Caudovirales	Myoviridae	Peduovirus	preVC_177	Clustered	VC_177_0	34	0.6033	1	5.21949	0.6033	1	1	1	1	1	1	6
Bacteriophage~Phobos	Heunggongvirae	Uroviricota	Caudoviricetes	Caudovirales	Siphoviridae	Unassigned		Overlap (VC_30/VC_32/VC_36)
Bacteriophage~R18C	Heunggongvirae	Uroviricota	Caudoviricetes	Caudovirales	Myoviridae	Peduovirus	preVC_177	Clustered	VC_177_0	34	0.6033	1	5.21949	0.6033	1	1	1	1	1	1	6
Bacteroides~phage~B124-14	Heunggongvirae	Uroviricota	Caudoviricetes	Caudovirales	Siphoviridae	Unassigned	preVC_240	Clustered	VC_240_0	2	0.4708	0.890809	2.82843	0.4194	1	1	1	1	1	1	0
Bacteroides~phage~B40-8	Heunggongvirae	Uroviricota	Caudoviricetes	Caudovirales	Siphoviridae	Unassigned	preVC_240	Clustered	VC_240_0	2	0.4708	0.890809	2.82843	0.4194	1	1	1	1	1	1	0
Bacteroides~phage~DAC15	Heunggongvirae	Uroviricota	Caudoviricetes	Caudovirales	Podoviridae	Unassigned	preVC_266	Clustered	VC_266_0	2	0.7361	0.812219	5.47723	0.5979	1	1	1	1	1	1	0
Bacteroides~phage~crAss001	Heunggongvirae	Uroviricota	Caudoviricetes	Caudovirales	Podoviridae	Unassigned	preVC_266	Clustered	VC_266_0	2	0.7361	0.812219	5.47723	0.5979	1	1	1	1	1	1	0
Bacteroides~phage~crAss002	Heunggongvirae	Uroviricota	Caudoviricetes	Caudovirales	Podoviridae	Unassigned	preVC_268	Clustered	VC_268_0	2	1	0	3.60555	0	1	1	1	1	1	1	0
Bdellovibrio~phage~phi1402	Heunggongvirae	Uroviricota	Caudoviricetes	Caudovirales	Myoviridae	Unassigned		Singleton
Bdellovibrio~phage~phi1422	Heunggongvirae	Uroviricota	Caudoviricetes	Caudovirales	Myoviridae	Unassigned		Outlier
Bordetella~phage~BPP-1	Heunggongvirae	Uroviricota	Caudoviricetes	Caudovirales	Podoviridae	Rauchvirus	preVC_274	Clustered	VC_274_0	3	0.1419	0.840712	6.92595	0.1193	1	1	1	1	1	1	1
Bordetella~phage~CN1	Heunggongvirae	Uroviricota	Caudoviricetes	Caudovirales	Mesyanzhinovviridae	Vojvodinavirus	preVC_2	Clustered	VC_2_0	9	0.5627	1	5.17314	0.5627	1	1	1	1	1	1	2
Bordetella~phage~CN2	Heunggongvirae	Uroviricota	Caudoviricetes	Caudovirales	Mesyanzhinovviridae	Vojvodinavirus	preVC_2	Clustered	VC_2_0	9	0.5627	1	5.17314	0.5627	1	1	1	1	1	1	2
Bordetella~phage~FP1	Heunggongvirae	Uroviricota	Caudoviricetes	Caudovirales	Mesyanzhinovviridae	Vojvodinavirus	preVC_2	Clustered	VC_2_0	9	0.5627	1	5.17314	0.5627	1	1	1	1	1	1	2
Bordetella~phage~MW2	Heunggongvirae	Uroviricota	Caudoviricetes	Caudovirales	Mesyanzhinovviridae	Vojvodinavirus	preVC_2	Clustered	VC_2_0	9	0.5627	1	5.17314	0.5627	1	1	1	1	1	1	2
Bordetella~phage~vB_BbrM_PHB04	Heunggongvirae	Uroviricota	Caudoviricetes	Caudovirales	Myoviridae	Phabquatrovirus		Outlier
Brevibacillus~phage~Jenst	Heunggongvirae	Uroviricota	Caudoviricetes	Caudovirales	Siphoviridae	Jenstvirus		Outlier
Brevibacillus~phage~Sundance	Heunggongvirae	Uroviricota	Caudoviricetes	Caudovirales	Siphoviridae	Unassigned	preVC_220	Clustered/Singleton	VC_220_5	1	0	0	0	0	1	1	1	1	1	1	0
Brevibacterium~phage~AGM1	Heunggongvirae	Uroviricota	Caudoviricetes	Caudovirales	Siphoviridae	Agmunavirus		Outlier
Brochothrix~phage~A9	Heunggongvirae	Uroviricota	Caudoviricetes	Caudovirales	Herelleviridae	Unassigned		Outlier
Brochothrix~phage~BL3	Heunggongvirae	Uroviricota	Caudoviricetes	Caudovirales	Siphoviridae	Unassigned		Outlier
Brucella~phage~BiPBO1	Heunggongvirae	Uroviricota	Caudoviricetes	Caudovirales	Siphoviridae	Unassigned	preVC_283	Clustered	VC_283_0	2	0.7073	0.333333	7.68115	0.2358	1	1	1	1	1	1	0
Brucella~phage~Pr	Heunggongvirae	Uroviricota	Caudoviricetes	Caudovirales	Podoviridae	Perisivirus	preVC_284	Clustered	VC_284_0	2	0.7619	0.904762	1	0.6893	1	1	1	1	1	1	1
Brucella~phage~Tb	Heunggongvirae	Uroviricota	Caudoviricetes	Caudovirales	Podoviridae	Perisivirus	preVC_284	Clustered	VC_284_0	2	0.7619	0.904762	1	0.6893	1	1	1	1	1	1	1
Burkholderia~phage~AP3	Heunggongvirae	Uroviricota	Caudoviricetes	Caudovirales	Myoviridae	Kisquinquevirus		Overlap (VC_24/VC_178)
Burkholderia~phage~Bcep1	Heunggongvirae	Uroviricota	Caudoviricetes	Caudovirales	Myoviridae	Naesvirus	preVC_65	Clustered	VC_65_0	12	0.8559	1	7.11871	0.8559	0.9394	1	1	1	1	1	2
Burkholderia~phage~Bcep176	Heunggongvirae	Uroviricota	Caudoviricetes	Caudovirales	Siphoviridae	Unassigned	preVC_287	Clustered	VC_287_0	5	0.4391	1	7.08775	0.4391	1	1	1	1	1	1	1
Burkholderia~phage~Bcep22	Heunggongvirae	Uroviricota	Caudoviricetes	Caudovirales	Podoviridae	Lessievirus		Overlap (VC_292/VC_294)
Burkholderia~phage~Bcep43	Heunggongvirae	Uroviricota	Caudoviricetes	Caudovirales	Myoviridae	Naesvirus	preVC_65	Clustered	VC_65_0	12	0.8559	1	7.11871	0.8559	0.9394	1	1	1	1	1	2
Burkholderia~phage~Bcep781	Heunggongvirae	Uroviricota	Caudoviricetes	Caudovirales	Myoviridae	Naesvirus	preVC_65	Clustered	VC_65_0	12	0.8559	1	7.11871	0.8559	0.9394	1	1	1	1	1	2
Burkholderia~phage~BcepB1A	Heunggongvirae	Uroviricota	Caudoviricetes	Caudovirales	Myoviridae	Unassigned		Outlier
Burkholderia~phage~BcepC6B	Heunggongvirae	Uroviricota	Caudoviricetes	Caudovirales	Podoviridae	Ryyoungvirus		Overlap (VC_259/VC_275)
Burkholderia~phage~BcepF1	Heunggongvirae	Uroviricota	Caudoviricetes	Caudovirales	Myoviridae	Bcepfunavirus	preVC_294	Clustered	VC_294_0	7	0.0742	0.741463	7.25993	0.055	0.8571	1	1	1	1	1	5
Burkholderia~phage~BcepGomr	Heunggongvirae	Uroviricota	Caudoviricetes	Caudovirales	Siphoviridae	Unassigned		Outlier
Burkholderia~phage~BcepIL02	Heunggongvirae	Uroviricota	Caudoviricetes	Caudovirales	Podoviridae	Lessievirus		Overlap (VC_292/VC_294)
Burkholderia~phage~BcepMigl	Heunggongvirae	Uroviricota	Caudoviricetes	Caudovirales	Podoviridae	Lessievirus		Overlap (VC_292/VC_294)
Burkholderia~phage~BcepMu	Heunggongvirae	Uroviricota	Caudoviricetes	Caudovirales	Myoviridae	Bcepmuvirus		Overlap (VC_298/VC_299)
Burkholderia~phage~BcepNY3	Heunggongvirae	Uroviricota	Caudoviricetes	Caudovirales	Myoviridae	Naesvirus	preVC_65	Clustered	VC_65_0	12	0.8559	1	7.11871	0.8559	0.9394	1	1	1	1	1	2
Burkholderia~phage~BcepNazgul	Heunggongvirae	Uroviricota	Caudoviricetes	Caudovirales	Casjensviridae	Nazgulvirus	preVC_35	Clustered	VC_35_0	7	0.0542	0.997448	6.96667	0.054	1	1	1	1	1	2	2
Burkholderia~phage~BcepSaruman	Heunggongvirae	Uroviricota	Caudoviricetes	Caudovirales	Myoviridae	Sarumanvirus	preVC_25	Clustered	VC_25_0	2	0.3534	0.879635	3	0.3108	1	1	1	1	1	1	1
Burkholderia~phage~BcepSauron	Heunggongvirae	Uroviricota	Caudoviricetes	Caudovirales	Myoviridae	Sarumanvirus	preVC_25	Clustered	VC_25_0	2	0.3534	0.879635	3	0.3108	1	1	1	1	1	1	1
Burkholderia~phage~Bp-AMP1	Heunggongvirae	Uroviricota	Caudoviricetes	Caudovirales	Autographiviridae	Ampunavirus	preVC_95	Clustered	VC_95_0	26	0.6453	1	6.40041	0.6453	1	1	1	1	1	1	16
Burkholderia~phage~DC1	Heunggongvirae	Uroviricota	Caudoviricetes	Caudovirales	Podoviridae	Lessievirus		Overlap (VC_292/VC_294)
Burkholderia~phage~FLC5	Heunggongvirae	Uroviricota	Caudoviricetes	Caudovirales	Myoviridae	Kisquattuordecimvirus		Overlap (VC_24/VC_178)
Burkholderia~phage~JG068	Heunggongvirae	Uroviricota	Caudoviricetes	Caudovirales	Autographiviridae	Mguuvirus	preVC_95	Clustered	VC_95_0	26	0.6453	1	6.40041	0.6453	1	1	1	1	1	1	16
Burkholderia~phage~KL3	Heunggongvirae	Uroviricota	Caudoviricetes	Caudovirales	Myoviridae	Tigrvirus		Overlap (VC_24/VC_178)
Burkholderia~phage~KS10	Heunggongvirae	Uroviricota	Caudoviricetes	Caudovirales	Myoviridae	Unassigned		Outlier
Burkholderia~phage~KS14	Heunggongvirae	Uroviricota	Caudoviricetes	Caudovirales	Myoviridae	Kisquattuordecimvirus		Overlap (VC_24/VC_178)
Burkholderia~phage~KS5	Heunggongvirae	Uroviricota	Caudoviricetes	Caudovirales	Myoviridae	Kisquinquevirus		Overlap (VC_24/VC_178)
Burkholderia~phage~KS9	Heunggongvirae	Uroviricota	Caudoviricetes	Caudovirales	Siphoviridae	Unassigned	preVC_287	Clustered	VC_287_0	5	0.4391	1	7.08775	0.4391	1	1	1	1	1	1	1
Burkholderia~phage~Mana	Heunggongvirae	Uroviricota	Caudoviricetes	Caudovirales	Myoviridae	Kisquinquevirus		Overlap (VC_24/VC_178)
Burkholderia~phage~Mica	Heunggongvirae	Uroviricota	Caudoviricetes	Caudovirales	Myoviridae	Unassigned	preVC_20	Clustered	VC_20_0	8	0.4772	1	5.44201	0.4772	1	1	1	1	1	1	1
Burkholderia~phage~ST79	Heunggongvirae	Uroviricota	Caudoviricetes	Caudovirales	Myoviridae	Nampongvirus		Overlap (VC_24/VC_178)
Burkholderia~phage~phi1026b	Heunggongvirae	Uroviricota	Caudoviricetes	Caudovirales	Siphoviridae	Stanholtvirus	preVC_287	Clustered	VC_287_0	5	0.4391	1	7.08775	0.4391	1	1	1	1	1	1	1
Burkholderia~phage~phi644-2	Heunggongvirae	Uroviricota	Caudoviricetes	Caudovirales	Siphoviridae	Stanholtvirus	preVC_287	Clustered	VC_287_0	5	0.4391	1	7.08775	0.4391	1	1	1	1	1	1	1
Burkholderia~phage~phiE094	Heunggongvirae	Uroviricota	Caudoviricetes	Caudovirales	Myoviridae	Tigrvirus		Overlap (VC_24/VC_178)
Burkholderia~phage~phiE12-2	Heunggongvirae	Uroviricota	Caudoviricetes	Caudovirales	Myoviridae	Tigrvirus		Overlap (VC_24/VC_178)
Burkholderia~phage~phiE125	Heunggongvirae	Uroviricota	Caudoviricetes	Caudovirales	Siphoviridae	Stanholtvirus	preVC_287	Clustered	VC_287_0	5	0.4391	1	7.08775	0.4391	1	1	1	1	1	1	1
Burkholderia~phage~phiE202	Heunggongvirae	Uroviricota	Caudoviricetes	Caudovirales	Myoviridae	Tigrvirus		Overlap (VC_24/VC_178)
Burkholderia~phage~phiE255	Heunggongvirae	Uroviricota	Caudoviricetes	Caudovirales	Myoviridae	Bcepmuvirus		Overlap (VC_298/VC_299)
Burkholderia~phage~vB_BceS_AH2	Heunggongvirae	Uroviricota	Caudoviricetes	Caudovirales	Casjensviridae	Ahduovirus	preVC_35	Clustered	VC_35_0	7	0.0542	0.997448	6.96667	0.054	1	1	1	1	1	2	2
Burkholderia~phage~vB_BceS_KL1	Heunggongvirae	Uroviricota	Caudoviricetes	Caudovirales	Siphoviridae	Kilunavirus	preVC_1	Clustered	VC_1_0	12	0.6938	1	6.09394	0.6938	1	1	1	1	1	1	4
Burkholderia~phage~vB_BmuP_KL4	Heunggongvirae	Uroviricota	Caudoviricetes	Caudovirales	Podoviridae	Kelquatrovirus		Overlap (VC_259/VC_275)
Burkholderia~virus~phi52237	Heunggongvirae	Uroviricota	Caudoviricetes	Caudovirales	Myoviridae	Tigrvirus		Overlap (VC_24/VC_178)
Butyrivibrio~virus~Arawn	Heunggongvirae	Uroviricota	Caudoviricetes	Caudovirales	Siphoviridae	Arawnvirus		Outlier
Campylobacter~phage~CP21	Heunggongvirae	Uroviricota	Caudoviricetes	Caudovirales	Myoviridae	Firehammervirus	preVC_306	Clustered	VC_306_0	4	0.6897	0.999802	5.40744	0.6896	1	1	1	1	1	1	1
Campylobacter~phage~CP30A	Heunggongvirae	Uroviricota	Caudoviricetes	Caudovirales	Myoviridae	Fletchervirus	preVC_305	Clustered	VC_305_0	6	0.8475	1	4.28015	0.8475	1	1	1	1	1	1	1
Campylobacter~phage~CPX	Heunggongvirae	Uroviricota	Caudoviricetes	Caudovirales	Myoviridae	Fletchervirus	preVC_305	Clustered	VC_305_0	6	0.8475	1	4.28015	0.8475	1	1	1	1	1	1	1
Campylobacter~phage~NCTC12673	Heunggongvirae	Uroviricota	Caudoviricetes	Caudovirales	Myoviridae	Fletchervirus	preVC_305	Clustered	VC_305_0	6	0.8475	1	4.28015	0.8475	1	1	1	1	1	1	1
Campylobacter~phage~PC14	Heunggongvirae	Uroviricota	Caudoviricetes	Caudovirales	Myoviridae	Fletchervirus	preVC_305	Clustered	VC_305_0	6	0.8475	1	4.28015	0.8475	1	1	1	1	1	1	1
Campylobacter~phage~vB_CcoM-IBB_35	Heunggongvirae	Uroviricota	Caudoviricetes	Caudovirales	Myoviridae	Firehammervirus	preVC_306	Clustered	VC_306_0	4	0.6897	0.999802	5.40744	0.6896	1	1	1	1	1	1	1
Campylobacter~phage~vB_CjeM_Los1	Heunggongvirae	Uroviricota	Caudoviricetes	Caudovirales	Myoviridae	Fletchervirus	preVC_305	Clustered	VC_305_0	6	0.8475	1	4.28015	0.8475	1	1	1	1	1	1	1
Campylobacter~virus~CP220	Heunggongvirae	Uroviricota	Caudoviricetes	Caudovirales	Myoviridae	Firehammervirus	preVC_306	Clustered	VC_306_0	4	0.6897	0.999802	5.40744	0.6896	1	1	1	1	1	1	1
Campylobacter~virus~CP81	Heunggongvirae	Uroviricota	Caudoviricetes	Caudovirales	Myoviridae	Fletchervirus	preVC_305	Clustered	VC_305_0	6	0.8475	1	4.28015	0.8475	1	1	1	1	1	1	1
Campylobacter~virus~CPt10	Heunggongvirae	Uroviricota	Caudoviricetes	Caudovirales	Myoviridae	Firehammervirus	preVC_306	Clustered	VC_306_0	4	0.6897	0.999802	5.40744	0.6896	1	1	1	1	1	1	1
Caulobacter~phage~CcrBL10	Heunggongvirae	Uroviricota	Caudoviricetes	Caudovirales	Siphoviridae	Poindextervirus	preVC_129	Clustered	VC_129_2	2	0.082	0.655798	5.2915	0.0538	1	1	1	1	1	1	2
Caulobacter~phage~CcrBL9	Heunggongvirae	Uroviricota	Caudoviricetes	Caudovirales	Siphoviridae	Bertelyvirus	preVC_129	Clustered	VC_129_0	2	0.1709	0.904762	4.79583	0.1547	1	1	1	1	1	1	1
Caulobacter~phage~CcrColossus	Heunggongvirae	Uroviricota	Caudoviricetes	Caudovirales	Siphoviridae	Colossusvirus	preVC_129	Clustered	VC_129_1	2	0.1281	0.904762	5.19615	0.1159	1	1	1	1	1	1	1
Caulobacter~phage~CcrPW	Heunggongvirae	Uroviricota	Caudoviricetes	Caudovirales	Siphoviridae	Colossusvirus	preVC_129	Clustered	VC_129_1	2	0.1281	0.904762	5.19615	0.1159	1	1	1	1	1	1	1
Caulobacter~phage~CcrSC	Heunggongvirae	Uroviricota	Caudoviricetes	Caudovirales	Siphoviridae	Bertelyvirus	preVC_129	Clustered	VC_129_0	2	0.1709	0.904762	4.79583	0.1547	1	1	1	1	1	1	1
Caulobacter~phage~Cr30	Heunggongvirae	Uroviricota	Caudoviricetes	Caudovirales	Myoviridae	Unassigned		Outlier
Caulobacter~phage~Lullwater	Heunggongvirae	Uroviricota	Caudoviricetes	Caudovirales	Autographiviridae	Lullwatervirus	preVC_95	Clustered	VC_95_0	26	0.6453	1	6.40041	0.6453	1	1	1	1	1	1	16
Caulobacter~phage~Percy	Heunggongvirae	Uroviricota	Caudoviricetes	Caudovirales	Autographiviridae	Percyvirus	preVC_95	Clustered	VC_95_0	26	0.6453	1	6.40041	0.6453	1	1	1	1	1	1	16
Caulobacter~phage~Sansa	Heunggongvirae	Uroviricota	Caudoviricetes	Caudovirales	Siphoviridae	Sansavirus		Singleton
Caulobacter~phage~Seuss	Heunggongvirae	Uroviricota	Caudoviricetes	Caudovirales	Siphoviridae	Seussvirus	preVC_18	Clustered	VC_18_0	2	1	0	7	0	1	1	1	1	1	1	1
Caulobacter~virus~Karma	Heunggongvirae	Uroviricota	Caudoviricetes	Caudovirales	Siphoviridae	Shapirovirus	preVC_129	Clustered	VC_129_3	4	0.2986	0.996679	5.02066	0.2976	1	1	1	1	1	1	1
Caulobacter~virus~Magneto	Heunggongvirae	Uroviricota	Caudoviricetes	Caudovirales	Siphoviridae	Shapirovirus	preVC_129	Clustered	VC_129_3	4	0.2986	0.996679	5.02066	0.2976	1	1	1	1	1	1	1
Caulobacter~virus~Rogue	Heunggongvirae	Uroviricota	Caudoviricetes	Caudovirales	Siphoviridae	Phicbkvirus	preVC_129	Clustered	VC_129_2	2	0.082	0.655798	5.2915	0.0538	1	1	1	1	1	1	2
Caulobacter~virus~Swift	Heunggongvirae	Uroviricota	Caudoviricetes	Caudovirales	Siphoviridae	Shapirovirus	preVC_129	Clustered	VC_129_3	4	0.2986	0.996679	5.02066	0.2976	1	1	1	1	1	1	1
Caulobacter~virus~phiCbK	Heunggongvirae	Uroviricota	Caudoviricetes	Caudovirales	Siphoviridae	Shapirovirus	preVC_129	Clustered	VC_129_3	4	0.2986	0.996679	5.02066	0.2976	1	1	1	1	1	1	1
Celeribacter~phage~P12053L	Heunggongvirae	Uroviricota	Caudoviricetes	Caudovirales	Zobellviridae	Siovirus	preVC_308	Clustered	VC_308_0	4	0.8039	0.999998	5.42272	0.8039	1	1	1	1	1	1	1
Cellulophaga~phage~phi10:1	Heunggongvirae	Uroviricota	Caudoviricetes	Caudovirales	Siphoviridae	Unassigned	preVC_311	Clustered	VC_311_0	2	0.4039	0.888117	7.87401	0.3587	1	1	1	1	1	1	0
Cellulophaga~phage~phi12:1	Heunggongvirae	Uroviricota	Caudoviricetes	Caudovirales	Siphoviridae	Helsingorvirus	preVC_313	Clustered	VC_313_0	3	0.8972	0.978708	3.11781	0.8781	1	1	1	1	1	1	1
Cellulophaga~phage~phi13:2	Heunggongvirae	Uroviricota	Caudoviricetes	Caudovirales	Podoviridae	Unassigned	preVC_310	Clustered	VC_310_0	4	0.9348	0.999963	7.00954	0.9348	1	1	1	1	1	1	0
Cellulophaga~phage~phi14:2	Heunggongvirae	Uroviricota	Caudoviricetes	Caudovirales	Podoviridae	Unassigned		Outlier
Cellulophaga~phage~phi17:1	Heunggongvirae	Uroviricota	Caudoviricetes	Caudovirales	Siphoviridae	Helsingorvirus	preVC_313	Clustered	VC_313_0	3	0.8972	0.978708	3.11781	0.8781	1	1	1	1	1	1	1
Cellulophaga~phage~phi17:2	Heunggongvirae	Uroviricota	Caudoviricetes	Caudovirales	Podoviridae	Lightbulbvirus	preVC_312	Clustered	VC_312_0	2	0.9293	0.75	3.16228	0.697	1	1	1	1	1	1	1
Cellulophaga~phage~phi18:1	Heunggongvirae	Uroviricota	Caudoviricetes	Caudovirales	Siphoviridae	Helsingorvirus	preVC_313	Clustered	VC_313_0	3	0.8972	0.978708	3.11781	0.8781	1	1	1	1	1	1	1
Cellulophaga~phage~phi18:3	Heunggongvirae	Uroviricota	Caudoviricetes	Caudovirales	Podoviridae	Unassigned	preVC_310	Clustered	VC_310_0	4	0.9348	0.999963	7.00954	0.9348	1	1	1	1	1	1	0
Cellulophaga~phage~phi19:1	Heunggongvirae	Uroviricota	Caudoviricetes	Caudovirales	Siphoviridae	Unassigned	preVC_311	Clustered	VC_311_0	2	0.4039	0.888117	7.87401	0.3587	1	1	1	1	1	1	0
Cellulophaga~phage~phi19:3	Heunggongvirae	Uroviricota	Caudoviricetes	Caudovirales	Podoviridae	Unassigned	preVC_310	Clustered	VC_310_0	4	0.9348	0.999963	7.00954	0.9348	1	1	1	1	1	1	0
Cellulophaga~phage~phi38:1	Heunggongvirae	Uroviricota	Caudoviricetes	Caudovirales	Podoviridae	Unassigned		Outlier
Cellulophaga~phage~phi39:1	Heunggongvirae	Uroviricota	Caudoviricetes	Caudovirales	Siphoviridae	Unassigned		Singleton
Cellulophaga~phage~phi46:3	Heunggongvirae	Uroviricota	Caudoviricetes	Caudovirales	Podoviridae	Unassigned	preVC_310	Clustered	VC_310_0	4	0.9348	0.999963	7.00954	0.9348	1	1	1	1	1	1	0
Cellulophaga~phage~phi4:1	Heunggongvirae	Uroviricota	Caudoviricetes	Caudovirales	Podoviridae	Lightbulbvirus	preVC_312	Clustered	VC_312_0	2	0.9293	0.75	3.16228	0.697	1	1	1	1	1	1	1
Cellulophaga~phage~phiSM	Heunggongvirae	Uroviricota	Caudoviricetes	Caudovirales	Myoviridae	Unassigned		Outlier
Cellulophaga~phage~phiST	Heunggongvirae	Uroviricota	Caudoviricetes	Caudovirales	Siphoviridae	Cbastvirus		Singleton
Citrobacter~phage~CF1~DK-2017	Heunggongvirae	Uroviricota	Caudoviricetes	Caudovirales	Drexlerviridae	Tlsvirus	preVC_323	Clustered	VC_323_0	11	0.2017	1	5.86342	0.2017	1	1	1	1	1	1	2
Citrobacter~phage~CF1~ERZ-2017	Heunggongvirae	Uroviricota	Caudoviricetes	Caudovirales	Myoviridae	Moonvirus		Overlap (VC_56/VC_60)
Citrobacter~phage~CR44b	Heunggongvirae	Uroviricota	Caudoviricetes	Caudovirales	Autographiviridae	Kayfunavirus	preVC_327	Clustered	VC_327_0	20	0.7348	1	4.47304	0.7348	1	1	1	1	1	1	1
Citrobacter~phage~CR8	Heunggongvirae	Uroviricota	Caudoviricetes	Caudovirales	Autographiviridae	Kayfunavirus	preVC_327	Clustered	VC_327_0	20	0.7348	1	4.47304	0.7348	1	1	1	1	1	1	1
Citrobacter~phage~CVT22	Heunggongvirae	Uroviricota	Caudoviricetes	Caudovirales	Zobellviridae	Citrovirus	preVC_110	Clustered	VC_110_0	4	0.5165	0.99994	6.81904	0.5165	1	1	1	1	1	1	3
Citrobacter~phage~IME-CF2	Heunggongvirae	Uroviricota	Caudoviricetes	Caudovirales	Myoviridae	Pseudotevenvirus	preVC_93	Clustered	VC_93_1	10	0.2816	1	6.92403	0.2816	1	1	1	1	1	1	1
Citrobacter~phage~Margaery	Heunggongvirae	Uroviricota	Caudoviricetes	Caudovirales	Myoviridae	Pseudotevenvirus	preVC_93	Clustered	VC_93_1	10	0.2816	1	6.92403	0.2816	1	1	1	1	1	1	1
Citrobacter~phage~Merlin	Heunggongvirae	Uroviricota	Caudoviricetes	Caudovirales	Myoviridae	Moonvirus		Overlap (VC_56/VC_60)
Citrobacter~phage~Michonne	Heunggongvirae	Uroviricota	Caudoviricetes	Caudovirales	Myoviridae	Mooglevirus	preVC_37	Clustered	VC_37_0	25	0.8878	1	5.64039	0.8878	0.9933	1	1	1	1	1	3
Citrobacter~phage~Miller	Heunggongvirae	Uroviricota	Caudoviricetes	Caudovirales	Myoviridae	Pseudotevenvirus	preVC_93	Clustered	VC_93_1	10	0.2816	1	6.92403	0.2816	1	1	1	1	1	1	1
Citrobacter~phage~Moogle	Heunggongvirae	Uroviricota	Caudoviricetes	Caudovirales	Myoviridae	Mooglevirus	preVC_37	Clustered	VC_37_0	25	0.8878	1	5.64039	0.8878	0.9933	1	1	1	1	1	3
Citrobacter~phage~Moon	Heunggongvirae	Uroviricota	Caudoviricetes	Caudovirales	Myoviridae	Moonvirus		Overlap (VC_56/VC_60)
Citrobacter~phage~Mordin	Heunggongvirae	Uroviricota	Caudoviricetes	Caudovirales	Myoviridae	Mooglevirus	preVC_37	Clustered	VC_37_0	25	0.8878	1	5.64039	0.8878	0.9933	1	1	1	1	1	3
Citrobacter~phage~PhiZZ23	Heunggongvirae	Uroviricota	Caudoviricetes	Caudovirales	Myoviridae	Tequatrovirus	preVC_56	Clustered/Singleton	VC_56_17	1	0	0	0	0	1	1	1	1	1	1	1
Citrobacter~phage~PhiZZ6	Heunggongvirae	Uroviricota	Caudoviricetes	Caudovirales	Myoviridae	Tequatrovirus	preVC_56	Clustered/Singleton	VC_56_24	1	0	0	0	0	1	1	1	1	1	1	1
Citrobacter~phage~SH1	Heunggongvirae	Uroviricota	Caudoviricetes	Caudovirales	Autographiviridae	Teetrevirus	preVC_328	Clustered	VC_328_0	64	0.8177	1	6.73071	0.8177	0.999	1	1	1	1	1	11
Citrobacter~phage~SH2	Heunggongvirae	Uroviricota	Caudoviricetes	Caudovirales	Autographiviridae	Teetrevirus	preVC_328	Clustered	VC_328_0	64	0.8177	1	6.73071	0.8177	0.999	1	1	1	1	1	11
Citrobacter~phage~SH3	Heunggongvirae	Uroviricota	Caudoviricetes	Caudovirales	Autographiviridae	Kayfunavirus	preVC_327	Clustered	VC_327_0	20	0.7348	1	4.47304	0.7348	1	1	1	1	1	1	1
Citrobacter~phage~SH4	Heunggongvirae	Uroviricota	Caudoviricetes	Caudovirales	Autographiviridae	Kayfunavirus	preVC_327	Clustered	VC_327_0	20	0.7348	1	4.47304	0.7348	1	1	1	1	1	1	1
Citrobacter~phage~Sazh	Heunggongvirae	Uroviricota	Caudoviricetes	Caudovirales	Drexlerviridae	Tlsvirus	preVC_323	Clustered	VC_323_0	11	0.2017	1	5.86342	0.2017	1	1	1	1	1	1	2
Citrobacter~phage~Stevie	Heunggongvirae	Uroviricota	Caudoviricetes	Caudovirales	Drexlerviridae	Tlsvirus	preVC_323	Clustered	VC_323_0	11	0.2017	1	5.86342	0.2017	1	1	1	1	1	1	2
Citrobacter~phage~phiCFP-1	Heunggongvirae	Uroviricota	Caudoviricetes	Caudovirales	Autographiviridae	Teetrevirus	preVC_328	Clustered	VC_328_0	64	0.8177	1	6.73071	0.8177	0.999	1	1	1	1	1	11
Citrobacter~phage~vB_CfrM_CfP1	Heunggongvirae	Uroviricota	Caudoviricetes	Caudovirales	Myoviridae	Pseudotevenvirus	preVC_93	Clustered	VC_93_1	10	0.2816	1	6.92403	0.2816	1	1	1	1	1	1	1
Citrobacter~phage~vB_CroM_CrRp10	Heunggongvirae	Uroviricota	Caudoviricetes	Caudovirales	Myoviridae	Tequatrovirus	preVC_56	Clustered/Singleton	VC_56_6	1	0	0	0	0	1	1	1	1	1	1	1
Citrobacter~phage~vB_CroP_CrRp3	Heunggongvirae	Uroviricota	Caudoviricetes	Caudovirales	Autographiviridae	Vectrevirus	preVC_339	Clustered	VC_339_0	19	0.6167	1	4.80314	0.6167	1	1	1	1	1	1	5
Citrobacter~virus~HCF1	Heunggongvirae	Uroviricota	Caudoviricetes	Caudovirales	Drexlerviridae	Hicfunavirus	preVC_323	Clustered	VC_323_0	11	0.2017	1	5.86342	0.2017	1	1	1	1	1	1	2
Clavibacter~phage~CMP1	Heunggongvirae	Uroviricota	Caudoviricetes	Caudovirales	Siphoviridae	Cimpunavirus	preVC_155	Clustered	VC_155_0	3	0.636	0.97619	5.21895	0.6209	1	1	1	1	1	1	3
Clavibacter~phage~CN1A	Heunggongvirae	Uroviricota	Caudoviricetes	Caudovirales	Siphoviridae	Cinunavirus	preVC_155	Clustered	VC_155_0	3	0.636	0.97619	5.21895	0.6209	1	1	1	1	1	1	3
Clostridium~phage~CDKM15	Heunggongvirae	Uroviricota	Caudoviricetes	Caudovirales	Myoviridae	Colneyvirus	preVC_233	Clustered	VC_233_1	5	0.3842	1	6.79093	0.3842	1	1	1	1	1	1	2
Clostridium~phage~CDKM9	Heunggongvirae	Uroviricota	Caudoviricetes	Caudovirales	Myoviridae	Colneyvirus	preVC_233	Clustered	VC_233_1	5	0.3842	1	6.79093	0.3842	1	1	1	1	1	1	2
Clostridium~phage~CPD2	Heunggongvirae	Uroviricota	Caudoviricetes	Caudovirales	Guelinviridae	Gregsiragusavirus		Overlap (VC_343/VC_344)
Clostridium~phage~CPS1	Heunggongvirae	Uroviricota	Caudoviricetes	Caudovirales	Guelinviridae	Gregsiragusavirus		Overlap (VC_343/VC_344)
Clostridium~phage~CPS2	Heunggongvirae	Uroviricota	Caudoviricetes	Caudovirales	Guelinviridae	Brucesealvirus	preVC_343	Clustered	VC_343_0	4	0.6046	0.999718	2.31364	0.6045	1	1	1	1	1	1	1
Clostridium~phage~CpV1	Heunggongvirae	Uroviricota	Caudoviricetes	Caudovirales	Guelinviridae	Capvunavirus		Overlap (VC_343/VC_344)
Clostridium~phage~PhiS63	Heunggongvirae	Uroviricota	Caudoviricetes	Caudovirales	Siphoviridae	Unassigned	preVC_213	Clustered	VC_213_0	3	0.3108	0.993574	6.71463	0.3088	1	1	1	1	1	1	0
Clostridium~phage~c-st	Heunggongvirae	Uroviricota	Caudoviricetes	Caudovirales	Siphoviridae	Unassigned	preVC_220	Clustered/Singleton	VC_220_0	1	0	0	0	0	1	1	1	1	1	1	0
Clostridium~phage~phi24R	Heunggongvirae	Uroviricota	Caudoviricetes	Caudovirales	Guelinviridae	Gregsiragusavirus		Overlap (VC_343/VC_344)
Clostridium~phage~phi3626	Heunggongvirae	Uroviricota	Caudoviricetes	Caudovirales	Siphoviridae	Unassigned	preVC_213	Clustered	VC_213_0	3	0.3108	0.993574	6.71463	0.3088	1	1	1	1	1	1	0
Clostridium~phage~phi8074-B1	Heunggongvirae	Uroviricota	Caudoviricetes	Caudovirales	Siphoviridae	Unassigned	preVC_228	Clustered	VC_228_0	3	0.6533	0.909441	6.80905	0.5941	1	1	1	1	1	1	0
Clostridium~phage~phiCD211	Heunggongvirae	Uroviricota	Caudoviricetes	Caudovirales	Siphoviridae	Unassigned	preVC_220	Clustered/Singleton	VC_220_1	1	0	0	0	0	1	1	1	1	1	1	0
Clostridium~phage~phiCD481-1	Heunggongvirae	Uroviricota	Caudoviricetes	Caudovirales	Myoviridae	Sherbrookevirus	preVC_304	Clustered	VC_304_0	6	0.6132	1	3.63818	0.6132	1	1	1	1	1	1	1
Clostridium~phage~phiCD505	Heunggongvirae	Uroviricota	Caudoviricetes	Caudovirales	Myoviridae	Colneyvirus	preVC_233	Clustered	VC_233_1	5	0.3842	1	6.79093	0.3842	1	1	1	1	1	1	2
Clostridium~phage~phiCD506	Heunggongvirae	Uroviricota	Caudoviricetes	Caudovirales	Myoviridae	Sherbrookevirus	preVC_304	Clustered	VC_304_0	6	0.6132	1	3.63818	0.6132	1	1	1	1	1	1	1
Clostridium~phage~phiCD6356	Heunggongvirae	Uroviricota	Caudoviricetes	Caudovirales	Siphoviridae	Unassigned		Outlier
Clostridium~phage~phiCDHM11	Heunggongvirae	Uroviricota	Caudoviricetes	Caudovirales	Myoviridae	Sherbrookevirus	preVC_304	Clustered	VC_304_0	6	0.6132	1	3.63818	0.6132	1	1	1	1	1	1	1
Clostridium~phage~phiCDHM13	Heunggongvirae	Uroviricota	Caudoviricetes	Caudovirales	Myoviridae	Sherbrookevirus	preVC_304	Clustered	VC_304_0	6	0.6132	1	3.63818	0.6132	1	1	1	1	1	1	1
Clostridium~phage~phiCDHM14	Heunggongvirae	Uroviricota	Caudoviricetes	Caudovirales	Myoviridae	Sherbrookevirus	preVC_304	Clustered	VC_304_0	6	0.6132	1	3.63818	0.6132	1	1	1	1	1	1	1
Clostridium~phage~phiCDHM19	Heunggongvirae	Uroviricota	Caudoviricetes	Caudovirales	Myoviridae	Lubbockvirus	preVC_233	Clustered	VC_233_0	2	0.0966	0.901503	6.32456	0.0871	1	1	1	1	1	1	1
Clostridium~phage~phiCP13O	Heunggongvirae	Uroviricota	Caudoviricetes	Caudovirales	Siphoviridae	Unassigned	preVC_344	Clustered	VC_344_0	4	1	0	3.4234	0	1	1	1	1	1	1	0
Clostridium~phage~phiCP26F	Heunggongvirae	Uroviricota	Caudoviricetes	Caudovirales	Siphoviridae	Unassigned	preVC_344	Clustered	VC_344_0	4	1	0	3.4234	0	1	1	1	1	1	1	0
Clostridium~phage~phiCP34O	Heunggongvirae	Uroviricota	Caudoviricetes	Caudovirales	Siphoviridae	Unassigned	preVC_344	Clustered	VC_344_0	4	1	0	3.4234	0	1	1	1	1	1	1	0
Clostridium~phage~phiCP39-O	Heunggongvirae	Uroviricota	Caudoviricetes	Caudovirales	Siphoviridae	Unassigned	preVC_344	Clustered	VC_344_0	4	1	0	3.4234	0	1	1	1	1	1	1	0
Clostridium~phage~phiCP7R	Heunggongvirae	Uroviricota	Caudoviricetes	Caudovirales	Guelinviridae	Brucesealvirus	preVC_343	Clustered	VC_343_0	4	0.6046	0.999718	2.31364	0.6045	1	1	1	1	1	1	1
Clostridium~phage~phiCPV4	Heunggongvirae	Uroviricota	Caudoviricetes	Caudovirales	Guelinviridae	Brucesealvirus	preVC_343	Clustered	VC_343_0	4	0.6046	0.999718	2.31364	0.6045	1	1	1	1	1	1	1
Clostridium~phage~phiCT19406A	Heunggongvirae	Uroviricota	Caudoviricetes	Caudovirales	Siphoviridae	Unassigned	preVC_238	Clustered	VC_238_0	2	0.4443	0.882084	0	0.3919	1	1	1	1	1	1	0
Clostridium~phage~phiCT19406B	Heunggongvirae	Uroviricota	Caudoviricetes	Caudovirales	Myoviridae	Unassigned	preVC_88	Clustered	VC_88_0	3	0.423	0.996085	4.8074	0.4214	1	1	1	1	1	1	0
Clostridium~phage~phiCT19406C	Heunggongvirae	Uroviricota	Caudoviricetes	Caudovirales	Siphoviridae	Unassigned		Outlier
Clostridium~phage~phiCT453B	Heunggongvirae	Uroviricota	Caudoviricetes	Caudovirales	Myoviridae	Unassigned	preVC_88	Clustered	VC_88_0	3	0.423	0.996085	4.8074	0.4214	1	1	1	1	1	1	0
Clostridium~phage~phiCTC2A	Heunggongvirae	Uroviricota	Caudoviricetes	Caudovirales	Siphoviridae	Unassigned	preVC_238	Clustered	VC_238_0	2	0.4443	0.882084	0	0.3919	1	1	1	1	1	1	0
Clostridium~phage~phiCTC2B	Heunggongvirae	Uroviricota	Caudoviricetes	Caudovirales	Myoviridae	Unassigned	preVC_88	Clustered	VC_88_0	3	0.423	0.996085	4.8074	0.4214	1	1	1	1	1	1	0
Clostridium~phage~phiCTP1	Heunggongvirae	Uroviricota	Caudoviricetes	Caudovirales	Siphoviridae	Unassigned	preVC_228	Clustered	VC_228_0	3	0.6533	0.909441	6.80905	0.5941	1	1	1	1	1	1	0
Clostridium~phage~phiMMP02	Heunggongvirae	Uroviricota	Caudoviricetes	Caudovirales	Myoviridae	Colneyvirus	preVC_233	Clustered	VC_233_1	5	0.3842	1	6.79093	0.3842	1	1	1	1	1	1	2
Clostridium~phage~phiMMP04	Heunggongvirae	Uroviricota	Caudoviricetes	Caudovirales	Myoviridae	Sherbrookevirus	preVC_304	Clustered	VC_304_0	6	0.6132	1	3.63818	0.6132	1	1	1	1	1	1	1
Clostridium~phage~phiSM101	Heunggongvirae	Uroviricota	Caudoviricetes	Caudovirales	Siphoviridae	Unassigned	preVC_213	Clustered	VC_213_0	3	0.3108	0.993574	6.71463	0.3088	1	1	1	1	1	1	0
Clostridium~phage~phiZP2	Heunggongvirae	Uroviricota	Caudoviricetes	Caudovirales	Guelinviridae	Brucesealvirus	preVC_343	Clustered	VC_343_0	4	0.6046	0.999718	2.31364	0.6045	1	1	1	1	1	1	1
Clostridium~phage~phi~CD119	Heunggongvirae	Uroviricota	Caudoviricetes	Caudovirales	Myoviridae	Lubbockvirus	preVC_233	Clustered	VC_233_0	2	0.0966	0.901503	6.32456	0.0871	1	1	1	1	1	1	1
Clostridium~phage~susfortuna	Heunggongvirae	Uroviricota	Caudoviricetes	Caudovirales	Guelinviridae	Susfortunavirus		Outlier
Clostridium~phage~vB_CpeS-CP51	Heunggongvirae	Uroviricota	Caudoviricetes	Caudovirales	Siphoviridae	Unassigned		Outlier
Clostridium~virus~phiCD27	Heunggongvirae	Uroviricota	Caudoviricetes	Caudovirales	Myoviridae	Lubbockvirus	preVC_233	Clustered	VC_233_1	5	0.3842	1	6.79093	0.3842	1	1	1	1	1	1	2
Colwellia~phage~9A	Heunggongvirae	Uroviricota	Caudoviricetes	Caudovirales	Siphoviridae	Franklinbayvirus		Singleton
Corynebacterium~phage~BFK20	Heunggongvirae	Uroviricota	Caudoviricetes	Caudovirales	Siphoviridae	Sasvirus	preVC_348	Clustered	VC_348_0	3	0.6919	0.994453	4.17586	0.688	1	1	1	1	1	1	2
Corynebacterium~phage~C3PO	Heunggongvirae	Uroviricota	Caudoviricetes	Caudovirales	Zierdtviridae	Ceetrepovirus	preVC_350	Clustered	VC_350_0	10	0.7662	1	3.53772	0.7662	1	1	1	1	1	2	1
Corynebacterium~phage~Darwin	Heunggongvirae	Uroviricota	Caudoviricetes	Caudovirales	Zierdtviridae	Ceetrepovirus	preVC_350	Clustered	VC_350_0	10	0.7662	1	3.53772	0.7662	1	1	1	1	1	2	1
Corynebacterium~phage~Juicebox	Heunggongvirae	Uroviricota	Caudoviricetes	Caudovirales	Siphoviridae	Juiceboxvirus	preVC_346	Clustered	VC_346_0	2	0.1815	0.75	6.9282	0.1361	1	1	1	1	1	1	2
Corynebacterium~phage~Kimchi1738	Heunggongvirae	Uroviricota	Caudoviricetes	Caudovirales	Siphoviridae	Ceetrepovirus	preVC_350	Clustered	VC_350_0	10	0.7662	1	3.53772	0.7662	1	1	1	1	1	2	1
Corynebacterium~phage~P1201	Heunggongvirae	Uroviricota	Caudoviricetes	Caudovirales	Zierdtviridae	Chunghsingvirus	preVC_351	Clustered	VC_351_0	2	0.1196	0.91096	1.73205	0.1089	1	1	1	1	1	1	1
Corynebacterium~phage~Poushou	Heunggongvirae	Uroviricota	Caudoviricetes	Caudovirales	Siphoviridae	Poushouvirus	preVC_346	Clustered	VC_346_0	2	0.1815	0.75	6.9282	0.1361	1	1	1	1	1	1	2
Corynebacterium~phage~Stickynote	Heunggongvirae	Uroviricota	Caudoviricetes	Caudovirales	Siphoviridae	Ceetrepovirus	preVC_350	Clustered	VC_350_0	10	0.7662	1	3.53772	0.7662	1	1	1	1	1	2	1
Corynebacterium~phage~Zion	Heunggongvirae	Uroviricota	Caudoviricetes	Caudovirales	Zierdtviridae	Ceetrepovirus	preVC_350	Clustered	VC_350_0	10	0.7662	1	3.53772	0.7662	1	1	1	1	1	2	1
Corynebacterium~phage~phi673	Heunggongvirae	Uroviricota	Caudoviricetes	Caudovirales	Siphoviridae	Ikedavirus	preVC_348	Clustered	VC_348_0	3	0.6919	0.994453	4.17586	0.688	1	1	1	1	1	1	2
Corynebacterium~phage~phi674	Heunggongvirae	Uroviricota	Caudoviricetes	Caudovirales	Siphoviridae	Ikedavirus	preVC_348	Clustered	VC_348_0	3	0.6919	0.994453	4.17586	0.688	1	1	1	1	1	1	2
Croceibacter~phage~P2559S	Heunggongvirae	Uroviricota	Caudoviricetes	Caudovirales	Siphoviridae	Unassigned		Outlier
Cronobacter~phage~CR3	Heunggongvirae	Uroviricota	Caudoviricetes	Caudovirales	Myoviridae	Certrevirus		Overlap (VC_102/VC_103)
Cronobacter~phage~CR5	Heunggongvirae	Uroviricota	Caudoviricetes	Caudovirales	Myoviridae	Derbicusvirus	preVC_355	Clustered	VC_355_0	4	0.1422	0.999963	3.73649	0.1421	1	1	1	1	1	1	1
Cronobacter~phage~CR8	Heunggongvirae	Uroviricota	Caudoviricetes	Caudovirales	Myoviridae	Certrevirus		Overlap (VC_102/VC_103)
Cronobacter~phage~CR9	Heunggongvirae	Uroviricota	Caudoviricetes	Caudovirales	Myoviridae	Certrevirus		Overlap (VC_102/VC_103)
Cronobacter~phage~CS01	Heunggongvirae	Uroviricota	Caudoviricetes	Caudovirales	Drexlerviridae	Gyeonggidovirus	preVC_323	Clustered	VC_323_1	30	0.5951	1	6.23028	0.5951	1	1	1	1	1	1	5
Cronobacter~phage~Dev-CD-23823	Heunggongvirae	Uroviricota	Caudoviricetes	Caudovirales	Autographiviridae	Cronosvirus	preVC_94	Clustered	VC_94_0	14	0.6282	1	5.87943	0.6282	1	1	1	1	1	1	8
Cronobacter~phage~Dev2	Heunggongvirae	Uroviricota	Caudoviricetes	Caudovirales	Autographiviridae	Kayfunavirus	preVC_327	Clustered	VC_327_0	20	0.7348	1	4.47304	0.7348	1	1	1	1	1	1	1
Cronobacter~phage~ENT39118	Heunggongvirae	Uroviricota	Caudoviricetes	Caudovirales	Siphoviridae	Unassigned		Outlier
Cronobacter~phage~ENT47670	Heunggongvirae	Uroviricota	Caudoviricetes	Caudovirales	Siphoviridae	Unassigned		Outlier
Cronobacter~phage~ESP2949-1	Heunggongvirae	Uroviricota	Caudoviricetes	Caudovirales	Drexlerviridae	Kyungwonvirus		Outlier
Cronobacter~phage~ESSI-2	Heunggongvirae	Uroviricota	Caudoviricetes	Caudovirales	Myoviridae	Seongnamvirus	preVC_125	Clustered	VC_125_0	20	0.9706	1	5.56846	0.9706	1	1	1	1	1	1	12
Cronobacter~phage~GW1	Heunggongvirae	Uroviricota	Caudoviricetes	Caudovirales	Autographiviridae	Kayfunavirus	preVC_327	Clustered	VC_327_0	20	0.7348	1	4.47304	0.7348	1	1	1	1	1	1	1
Cronobacter~phage~JC01	Heunggongvirae	Uroviricota	Caudoviricetes	Caudovirales	Siphoviridae	Unassigned	preVC_33	Clustered	VC_33_0	38	0.7037	1	4.08522	0.7037	1	1	1	1	1	2	1
Cronobacter~phage~PBES~02	Heunggongvirae	Uroviricota	Caudoviricetes	Caudovirales	Myoviridae	Certrevirus		Overlap (VC_102/VC_103)
Cronobacter~phage~Pet-CM3-4	Heunggongvirae	Uroviricota	Caudoviricetes	Caudovirales	Myoviridae	Karamvirus		Overlap (VC_56/VC_60)
Cronobacter~phage~S13	Heunggongvirae	Uroviricota	Caudoviricetes	Caudovirales	Myoviridae	Unassigned		Outlier
Cronobacter~phage~phiES15	Heunggongvirae	Uroviricota	Caudoviricetes	Caudovirales	Siphoviridae	Unassigned		Outlier
Cronobacter~phage~vB_CsaM_GAP161	Heunggongvirae	Uroviricota	Caudoviricetes	Caudovirales	Myoviridae	Pseudotevenvirus	preVC_93	Clustered	VC_93_1	10	0.2816	1	6.92403	0.2816	1	1	1	1	1	1	1
Cronobacter~phage~vB_CsaM_GAP31	Heunggongvirae	Uroviricota	Caudoviricetes	Caudovirales	Myoviridae	Seunavirus	preVC_102	Clustered	VC_102_4	2	0.0303	0.841837	5.91608	0.0255	1	1	1	1	1	1	1
Cronobacter~phage~vB_CsaM_GAP32	Heunggongvirae	Uroviricota	Caudoviricetes	Caudovirales	Myoviridae	Mimasvirus	preVC_128	Clustered/Singleton	VC_128_2	1	0	0	0	0	1	1	1	1	1	1	1
Cronobacter~phage~vB_CsaM_leB	Heunggongvirae	Uroviricota	Caudoviricetes	Caudovirales	Myoviridae	Pseudotevenvirus	preVC_93	Clustered	VC_93_1	10	0.2816	1	6.92403	0.2816	1	1	1	1	1	1	1
Cronobacter~phage~vB_CsaM_leE	Heunggongvirae	Uroviricota	Caudoviricetes	Caudovirales	Myoviridae	Pseudotevenvirus	preVC_93	Clustered	VC_93_1	10	0.2816	1	6.92403	0.2816	1	1	1	1	1	1	1
Cronobacter~phage~vB_CsaP_009	Heunggongvirae	Uroviricota	Caudoviricetes	Caudovirales	Podoviridae	Privateervirus	preVC_107	Clustered	VC_107_0	2	0.1612	0.90451	3.60555	0.1458	1	1	1	1	1	1	1
Cronobacter~phage~vB_CsaP_GAP52	Heunggongvirae	Uroviricota	Caudoviricetes	Caudovirales	Podoviridae	Unassigned	preVC_107	Clustered	VC_107_1	2	0.0817	0.90498	7.4162	0.074	1	1	1	1	1	1	0
Cronobacter~phage~vB_CskP_GAP227	Heunggongvirae	Uroviricota	Caudoviricetes	Caudovirales	Autographiviridae	Cronosvirus	preVC_94	Clustered	VC_94_0	14	0.6282	1	5.87943	0.6282	1	1	1	1	1	1	8
Curvibacter~phage~P26059B	Heunggongvirae	Uroviricota	Caudoviricetes	Caudovirales	Autographiviridae	Kalppathivirus	preVC_95	Clustered	VC_95_0	26	0.6453	1	6.40041	0.6453	1	1	1	1	1	1	16
Cyanophage~9515-10a	Heunggongvirae	Uroviricota	Caudoviricetes	Caudovirales	Autographiviridae	Tangaroavirus	preVC_365	Clustered	VC_365_0	20	0.9041	1	6.87716	0.9041	1	1	1	1	1	1	15
Cyanophage~KBS-P-1A	Heunggongvirae	Uroviricota	Caudoviricetes	Caudovirales	Autographiviridae	Sednavirus	preVC_365	Clustered	VC_365_0	20	0.9041	1	6.87716	0.9041	1	1	1	1	1	1	15
Cyanophage~KBS-S-2A	Heunggongvirae	Uroviricota	Caudoviricetes	Caudovirales	Siphoviridae	Unassigned		Outlier
Cyanophage~MED4-117	Heunggongvirae	Uroviricota	Caudoviricetes	Caudovirales	Siphoviridae	Unassigned	preVC_288	Clustered	VC_288_0	2	0.78	0.333333	1	0.26	1	1	1	1	1	1	0
Cyanophage~NATL1A-7	Heunggongvirae	Uroviricota	Caudoviricetes	Caudovirales	Autographiviridae	Cheungvirus	preVC_365	Clustered	VC_365_0	20	0.9041	1	6.87716	0.9041	1	1	1	1	1	1	15
Cyanophage~NATL2A-133	Heunggongvirae	Uroviricota	Caudoviricetes	Caudovirales	Autographiviridae	Tangaroavirus	preVC_365	Clustered	VC_365_0	20	0.9041	1	6.87716	0.9041	1	1	1	1	1	1	15
Cyanophage~P-RSM1	Heunggongvirae	Uroviricota	Caudoviricetes	Caudovirales	Myoviridae	Unassigned	preVC_49	Clustered	VC_49_34	2	0.0136	0.873497	6.63325	0.0119	1	1	1	1	1	1	0
Cyanophage~P-RSM6	Heunggongvirae	Uroviricota	Caudoviricetes	Caudovirales	Myoviridae	Libanvirus	preVC_49	Clustered/Singleton	VC_49_11	1	0	0	0	0	1	1	1	1	1	1	1
Cyanophage~P-SSP2	Heunggongvirae	Uroviricota	Caudoviricetes	Caudovirales	Autographiviridae	Tritonvirus	preVC_365	Clustered	VC_365_0	20	0.9041	1	6.87716	0.9041	1	1	1	1	1	1	15
Cyanophage~P-TIM40	Heunggongvirae	Uroviricota	Caudoviricetes	Caudovirales	Myoviridae	Libanvirus	preVC_49	Clustered/Singleton	VC_49_22	1	0	0	0	0	1	1	1	1	1	1	1
Cyanophage~PP	Heunggongvirae	Uroviricota	Caudoviricetes	Caudovirales	Podoviridae	Wumptrevirus	preVC_134	Clustered	VC_134_0	2	0.5743	0.736448	1.41421	0.4229	1	1	1	1	1	1	1
Cyanophage~PSS2	Heunggongvirae	Uroviricota	Caudoviricetes	Caudovirales	Siphoviridae	Unassigned		Overlap (VC_370/VC_371)
Cyanophage~S-RIM12	Heunggongvirae	Uroviricota	Caudoviricetes	Caudovirales	Myoviridae	Brizovirus	preVC_49	Clustered	VC_49_9	7	0.0805	1	8.18937	0.0805	0.7619	1	1	1	1	1	3
Cyanophage~S-RIM32	Heunggongvirae	Uroviricota	Caudoviricetes	Caudovirales	Myoviridae	Unassigned	preVC_49	Clustered/Singleton	VC_49_20	1	0	0	0	0	1	1	1	1	1	1	0
Cyanophage~S-RIM44	Heunggongvirae	Uroviricota	Caudoviricetes	Caudovirales	Myoviridae	Vellamovirus	preVC_49	Clustered	VC_49_19	2	0.0169	0.868218	5.2915	0.0146	1	1	1	1	1	1	1
Cyanophage~S-RIM50	Heunggongvirae	Uroviricota	Caudoviricetes	Caudovirales	Myoviridae	Neptunevirus	preVC_49	Clustered	VC_49_6	3	0.0246	0.976244	6.59539	0.024	1	1	1	1	1	1	1
Cyanophage~S-TIM4	Heunggongvirae	Uroviricota	Caudoviricetes	Caudovirales	Myoviridae	Thaumasvirus	preVC_49	Clustered	VC_49_33	2	0.0134	0.873825	3.31662	0.0117	1	1	1	1	1	1	1
Cyanophage~S-TIM5	Heunggongvirae	Uroviricota	Caudoviricetes	Caudovirales	Myoviridae	Aurunvirus	preVC_369	Clustered/Singleton	VC_369_0	1	0	0	0	0	1	1	1	1	1	1	1
Cyanophage~SS120-1	Heunggongvirae	Uroviricota	Caudoviricetes	Caudovirales	Autographiviridae	Banchanvirus	preVC_365	Clustered	VC_365_0	20	0.9041	1	6.87716	0.9041	1	1	1	1	1	1	15
Delftia~phage~IME-DE1	Heunggongvirae	Uroviricota	Caudoviricetes	Caudovirales	Autographiviridae	Piedvirus		Overlap (VC_330/VC_335)
Delftia~phage~PhiW-14	Heunggongvirae	Uroviricota	Caudoviricetes	Caudovirales	Myoviridae	Ionavirus		Outlier
Delftia~phage~RG-2014	Heunggongvirae	Uroviricota	Caudoviricetes	Caudovirales	Schitoviridae	Dendoorenvirus	preVC_8	Clustered	VC_8_0	27	0.7083	1	7.98326	0.7083	0.7094	1	1	1	1	1	14
Dickeya~phage~BF25/12	Heunggongvirae	Uroviricota	Caudoviricetes	Caudovirales	Autographiviridae	Stompvirus	preVC_391	Clustered	VC_391_0	17	0.788	1	4.94111	0.788	1	1	1	1	1	1	4
Dickeya~phage~Dagda	Heunggongvirae	Uroviricota	Caudoviricetes	Caudovirales	Autographiviridae	Aarhusvirus		Overlap (VC_331/VC_332)
Dickeya~phage~Katbat	Heunggongvirae	Uroviricota	Caudoviricetes	Caudovirales	Autographiviridae	Aarhusvirus		Overlap (VC_331/VC_332)
Dickeya~phage~Luksen	Heunggongvirae	Uroviricota	Caudoviricetes	Caudovirales	Autographiviridae	Aarhusvirus		Overlap (VC_331/VC_332)
Dickeya~phage~Mysterion	Heunggongvirae	Uroviricota	Caudoviricetes	Caudovirales	Autographiviridae	Aarhusvirus		Overlap (VC_331/VC_332)
Dickeya~phage~Ninurta	Heunggongvirae	Uroviricota	Caudoviricetes	Caudovirales	Autographiviridae	Ningirsuvirus	preVC_331	Clustered	VC_331_0	2	0.0279	0.914558	2.44949	0.0255	1	1	1	1	1	1	1
Dickeya~phage~RC-2014	Heunggongvirae	Uroviricota	Caudoviricetes	Caudovirales	Ackermannviridae	Limestonevirus	preVC_50	Clustered	VC_50_2	7	0.0531	0.96954	7.31949	0.0515	1	1	1	1	1	1	2
Dickeya~phage~vB_DsoM_AD1	Heunggongvirae	Uroviricota	Caudoviricetes	Caudovirales	Myoviridae	Alexandravirus	preVC_26	Clustered	VC_26_1	3	0.225	0.98472	6.80217	0.2216	1	1	1	1	1	1	2
Dickeya~phage~vB_DsoM_JA11	Heunggongvirae	Uroviricota	Caudoviricetes	Caudovirales	Myoviridae	Salmondvirus	preVC_26	Clustered	VC_26_0	2	0.1035	0.883441	2.23607	0.0914	1	1	1	1	1	1	1
Dickeya~phage~vB_DsoM_JA29	Heunggongvirae	Uroviricota	Caudoviricetes	Caudovirales	Myoviridae	Salmondvirus	preVC_26	Clustered	VC_26_0	2	0.1035	0.883441	2.23607	0.0914	1	1	1	1	1	1	1
Dickeya~phage~vB_DsoP_JA10	Heunggongvirae	Uroviricota	Caudoviricetes	Caudovirales	Autographiviridae	Ningirsuvirus	preVC_331	Clustered	VC_331_0	2	0.0279	0.914558	2.44949	0.0255	1	1	1	1	1	1	1
Dickeya~virus~Limestone	Heunggongvirae	Uroviricota	Caudoviricetes	Caudovirales	Ackermannviridae	Limestonevirus	preVC_50	Clustered	VC_50_2	7	0.0531	0.96954	7.31949	0.0515	1	1	1	1	1	1	2
Dinoroseobacter~phage~DFL12phi1	Heunggongvirae	Uroviricota	Caudoviricetes	Caudovirales	Schitoviridae	Baltimorevirus		Overlap (VC_9/VC_10)
Dinoroseobacter~phage~DS-1410Ws-06	Heunggongvirae	Uroviricota	Caudoviricetes	Caudovirales	Schitoviridae	Sanyabayvirus		Overlap (VC_9/VC_10)
Dinoroseobacter~phage~vB_DshS-R5C	Heunggongvirae	Uroviricota	Caudoviricetes	Caudovirales	Siphoviridae	Nanhaivirus		Outlier
Edwardsiella~phage~Edno5	Heunggongvirae	Uroviricota	Caudoviricetes	Caudovirales	Myoviridae	Gofduovirus	preVC_66	Clustered	VC_66_0	2	0.1933	0.91095	4.58258	0.1761	1	1	1	1	1	1	1
Edwardsiella~phage~GF-2	Heunggongvirae	Uroviricota	Caudoviricetes	Caudovirales	Myoviridae	Gofduovirus	preVC_66	Clustered	VC_66_0	2	0.1933	0.91095	4.58258	0.1761	1	1	1	1	1	1	1
Edwardsiella~phage~KF-1	Heunggongvirae	Uroviricota	Caudoviricetes	Caudovirales	Podoviridae	Kafunavirus	preVC_395	Clustered	VC_395_0	3	1	0	3.99118	0	1	1	1	1	1	1	1
Edwardsiella~phage~MSW-3	Heunggongvirae	Uroviricota	Caudoviricetes	Caudovirales	Myoviridae	Yokohamavirus	preVC_122	Clustered	VC_122_0	9	0.8707	1	7.50207	0.8707	0.9167	1	1	1	1	1	4
Edwardsiella~phage~PEi20	Heunggongvirae	Uroviricota	Caudoviricetes	Caudovirales	Myoviridae	Kanagawavirus		Overlap (VC_56/VC_60)
Edwardsiella~phage~PEi21	Heunggongvirae	Uroviricota	Caudoviricetes	Caudovirales	Myoviridae	Yokohamavirus	preVC_122	Clustered	VC_122_0	9	0.8707	1	7.50207	0.8707	0.9167	1	1	1	1	1	4
Edwardsiella~phage~eiAU	Heunggongvirae	Uroviricota	Caudoviricetes	Caudovirales	Siphoviridae	Eiauvirus	preVC_362	Clustered	VC_362_0	2	0.1173	0.908705	0	0.1066	1	1	1	1	1	1	1
Edwardsiella~phage~eiAU-183	Heunggongvirae	Uroviricota	Caudoviricetes	Caudovirales	Siphoviridae	Eiauvirus	preVC_362	Clustered	VC_362_0	2	0.1173	0.908705	0	0.1066	1	1	1	1	1	1	1
Edwardsiella~virus~pEtSU	Heunggongvirae	Uroviricota	Caudoviricetes	Caudovirales	Myoviridae	Petsuvirus	preVC_354	Clustered	VC_354_0	2	0.0995	0.90617	3.60555	0.0902	1	1	1	1	1	1	1
Eggerthella~phage~PMBT5	Heunggongvirae	Uroviricota	Caudoviricetes	Caudovirales	Siphoviridae	Lentavirus		Outlier
Enterobacterial~phage~mEp390	Heunggongvirae	Uroviricota	Caudoviricetes	Caudovirales	Siphoviridae	Unassigned		Outlier
Enterobacteriaphage~UAB_Phi87	Heunggongvirae	Uroviricota	Caudoviricetes	Caudovirales	Myoviridae	Felixounavirus	preVC_37	Clustered	VC_37_0	25	0.8878	1	5.64039	0.8878	0.9933	1	1	1	1	1	3
Enterobacteria~phage~2851	Heunggongvirae	Uroviricota	Caudoviricetes	Caudovirales	Siphoviridae	Pankowvirus	preVC_302	Clustered	VC_302_0	7	0.1691	1	6.54734	0.1691	1	1	1	1	1	1	2
Enterobacteria~phage~9g	Heunggongvirae	Uroviricota	Caudoviricetes	Caudovirales	Siphoviridae	Nonagvirus	preVC_3	Clustered	VC_3_1	6	0.4607	1	5.25693	0.4607	1	1	1	1	1	1	2
Enterobacteria~phage~ATK47	Heunggongvirae	Uroviricota	Caudoviricetes	Caudovirales	Myoviridae	Mosigvirus	preVC_57	Clustered	VC_57_0	17	0.1836	1	6.97356	0.1836	0.9485	1	1	1	1	1	2
Enterobacteria~phage~Aplg8	Heunggongvirae	Uroviricota	Caudoviricetes	Caudovirales	Myoviridae	Tequatrovirus	preVC_56	Clustered/Singleton	VC_56_15	1	0	0	0	0	1	1	1	1	1	1	1
Enterobacteria~phage~BP-4795	Heunggongvirae	Uroviricota	Caudoviricetes	Caudovirales	Siphoviridae	Marienburgvirus	preVC_302	Clustered	VC_302_0	7	0.1691	1	6.54734	0.1691	1	1	1	1	1	1	2
Enterobacteria~phage~ES18	Heunggongvirae	Uroviricota	Caudoviricetes	Caudovirales	Siphoviridae	Unassigned		Outlier
Enterobacteria~phage~GEC-3S	Heunggongvirae	Uroviricota	Caudoviricetes	Caudovirales	Myoviridae	Krischvirus	preVC_58	Clustered	VC_58_0	6	0.1846	1	5.59762	0.1846	1	1	1	1	1	1	1
Enterobacteria~phage~GiZh	Heunggongvirae	Uroviricota	Caudoviricetes	Caudovirales	Myoviridae	Tequatrovirus	preVC_56	Clustered/Singleton	VC_56_16	1	0	0	0	0	1	1	1	1	1	1	1
Enterobacteria~phage~HK140	Heunggongvirae	Uroviricota	Caudoviricetes	Caudovirales	Siphoviridae	Yautsimvirus	preVC_262	Clustered	VC_262_0	16	0.4391	1	7.30155	0.4391	0.8833	1	1	1	1	1	10
Enterobacteria~phage~HK225	Heunggongvirae	Uroviricota	Caudoviricetes	Caudovirales	Siphoviridae	Unassigned	preVC_289	Clustered	VC_289_0	4	0.1091	0.999966	7.17177	0.1091	1	1	1	1	1	1	1
Enterobacteria~phage~HK620	Heunggongvirae	Uroviricota	Caudoviricetes	Caudovirales	Podoviridae	Lederbergvirus	preVC_260	Clustered	VC_260_0	3	0.0459	0.996681	7.86655	0.0457	1	1	1	1	1	1	1
Enterobacteria~phage~IME10	Heunggongvirae	Uroviricota	Caudoviricetes	Caudovirales	Podoviridae	Lederbergvirus		Outlier
Enterobacteria~phage~IME_EC2	Heunggongvirae	Uroviricota	Caudoviricetes	Caudovirales	Siphoviridae	Murrayvirus	preVC_261	Clustered	VC_261_0	6	0.702	1	5.94932	0.702	1	1	1	1	1	2	4
Enterobacteria~phage~JenK1	Heunggongvirae	Uroviricota	Caudoviricetes	Caudovirales	Siphoviridae	Nonagvirus	preVC_3	Clustered	VC_3_1	6	0.4607	1	5.25693	0.4607	1	1	1	1	1	1	2
Enterobacteria~phage~JenP1	Heunggongvirae	Uroviricota	Caudoviricetes	Caudovirales	Siphoviridae	Nonagvirus	preVC_3	Clustered	VC_3_1	6	0.4607	1	5.25693	0.4607	1	1	1	1	1	1	2
Enterobacteria~phage~JenP2	Heunggongvirae	Uroviricota	Caudoviricetes	Caudovirales	Siphoviridae	Nonagvirus	preVC_3	Clustered	VC_3_1	6	0.4607	1	5.25693	0.4607	1	1	1	1	1	1	2
Enterobacteria~phage~Kha5h	Heunggongvirae	Uroviricota	Caudoviricetes	Caudovirales	Myoviridae	Tequatrovirus	preVC_56	Clustered/Singleton	VC_56_13	1	0	0	0	0	1	1	1	1	1	1	1
Enterobacteria~phage~O276	Heunggongvirae	Uroviricota	Caudoviricetes	Caudovirales	Siphoviridae	Lambdavirus		Overlap (VC_303/VC_364)
Enterobacteria~phage~P4	Heunggongvirae	Uroviricota	Caudoviricetes	Caudovirales	Unassigned	Unassigned		Singleton
Enterobacteria~phage~P7	Heunggongvirae	Uroviricota	Caudoviricetes	Caudovirales	Myoviridae	Punavirus	preVC_404	Clustered	VC_404_0	6	0.9971	0.997549	7.44173	0.9946	0.8	1	1	1	1	1	1
Enterobacteria~phage~P88	Heunggongvirae	Uroviricota	Caudoviricetes	Caudovirales	Myoviridae	Xuanwuvirus		Overlap (VC_177/VC_178)
Enterobacteria~phage~RB18	Heunggongvirae	Uroviricota	Caudoviricetes	Caudovirales	Myoviridae	Tequatrovirus	preVC_56	Clustered/Singleton	VC_56_26	1	0	0	0	0	1	1	1	1	1	1	1
Enterobacteria~phage~RB27	Heunggongvirae	Uroviricota	Caudoviricetes	Caudovirales	Myoviridae	Tequatrovirus	preVC_56	Clustered/Singleton	VC_56_33	1	0	0	0	0	1	1	1	1	1	1	1
Enterobacteria~phage~RB51	Heunggongvirae	Uroviricota	Caudoviricetes	Caudovirales	Myoviridae	Tequatrovirus	preVC_56	Clustered	VC_56_48	2	0.0054	0.628984	2.82843	0.0034	1	1	1	1	1	1	1
Enterobacteria~phage~RB68	Heunggongvirae	Uroviricota	Caudoviricetes	Caudovirales	Myoviridae	Tequatrovirus	preVC_56	Clustered	VC_56_48	2	0.0054	0.628984	2.82843	0.0034	1	1	1	1	1	1	1
Enterobacteria~phage~ST104	Heunggongvirae	Uroviricota	Caudoviricetes	Caudovirales	Podoviridae	Lederbergvirus	preVC_260	Clustered	VC_260_1	15	0.4769	1	7.58045	0.4769	0.9714	1	1	1	1	1	1
Enterobacteria~phage~Sf101	Heunggongvirae	Uroviricota	Caudoviricetes	Caudovirales	Podoviridae	Lederbergvirus	preVC_260	Clustered	VC_260_0	3	0.0459	0.996681	7.86655	0.0457	1	1	1	1	1	1	1
Enterobacteria~phage~SfI	Heunggongvirae	Uroviricota	Caudoviricetes	Caudovirales	Myoviridae	Unassigned		Outlier
Enterobacteria~phage~SfV	Heunggongvirae	Uroviricota	Caudoviricetes	Caudovirales	Myoviridae	Unassigned		Overlap (VC_125/VC_290)
Enterobacteria~phage~T3	Heunggongvirae	Uroviricota	Caudoviricetes	Caudovirales	Autographiviridae	Teetrevirus	preVC_328	Clustered	VC_328_0	64	0.8177	1	6.73071	0.8177	0.999	1	1	1	1	1	11
Enterobacteria~phage~T6	Heunggongvirae	Uroviricota	Caudoviricetes	Caudovirales	Myoviridae	Tequatrovirus	preVC_56	Clustered	VC_56_0	2	0.0055	0.63893	8.544	0.0035	1	1	1	1	1	1	1
Enterobacteria~phage~T7M	Heunggongvirae	Uroviricota	Caudoviricetes	Caudovirales	Autographiviridae	Teetrevirus	preVC_328	Clustered	VC_328_0	64	0.8177	1	6.73071	0.8177	0.999	1	1	1	1	1	11
Enterobacteria~phage~UAB_Phi20	Heunggongvirae	Uroviricota	Caudoviricetes	Caudovirales	Podoviridae	Lederbergvirus	preVC_260	Clustered	VC_260_1	15	0.4769	1	7.58045	0.4769	0.9714	1	1	1	1	1	1
Enterobacteria~phage~VT2-Sakai	Heunggongvirae	Uroviricota	Caudoviricetes	Caudovirales	Podoviridae	Traversvirus	preVC_361	Clustered	VC_361_1	23	0.614	1	7.6319	0.614	0.8814	1	1	1	1	1	3
Enterobacteria~phage~VT2phi_272	Heunggongvirae	Uroviricota	Caudoviricetes	Caudovirales	Podoviridae	Oslovirus	preVC_361	Clustered	VC_361_1	23	0.614	1	7.6319	0.614	0.8814	1	1	1	1	1	3
Enterobacteria~phage~YYZ-2008	Heunggongvirae	Uroviricota	Caudoviricetes	Caudovirales	Siphoviridae	Pankowvirus	preVC_302	Clustered	VC_302_0	7	0.1691	1	6.54734	0.1691	1	1	1	1	1	1	2
Enterobacteria~phage~cdtI	Heunggongvirae	Uroviricota	Caudoviricetes	Caudovirales	Siphoviridae	Unassigned	preVC_289	Clustered	VC_289_1	6	0.1567	1	7.48795	0.1567	0.8667	1	1	1	1	1	1
Enterobacteria~phage~fiAA91-ss	Heunggongvirae	Uroviricota	Caudoviricetes	Caudovirales	Myoviridae	Peduovirus	preVC_177	Clustered	VC_177_0	34	0.6033	1	5.21949	0.6033	1	1	1	1	1	1	6
Enterobacteria~phage~mEp043~c-1	Heunggongvirae	Uroviricota	Caudoviricetes	Caudovirales	Siphoviridae	Aguilavirus	preVC_262	Clustered	VC_262_0	16	0.4391	1	7.30155	0.4391	0.8833	1	1	1	1	1	10
Enterobacteria~phage~mEp213	Heunggongvirae	Uroviricota	Caudoviricetes	Caudovirales	Siphoviridae	Aguilavirus	preVC_262	Clustered	VC_262_0	16	0.4391	1	7.30155	0.4391	0.8833	1	1	1	1	1	10
Enterobacteria~phage~mEp235	Heunggongvirae	Uroviricota	Caudoviricetes	Caudovirales	Siphoviridae	Nochtlivirus	preVC_262	Clustered	VC_262_0	16	0.4391	1	7.30155	0.4391	0.8833	1	1	1	1	1	10
Enterobacteria~phage~mEp237	Heunggongvirae	Uroviricota	Caudoviricetes	Caudovirales	Siphoviridae	Unassigned	preVC_289	Clustered	VC_289_0	4	0.1091	0.999966	7.17177	0.1091	1	1	1	1	1	1	1
Enterobacteria~phage~mEp460	Heunggongvirae	Uroviricota	Caudoviricetes	Caudovirales	Siphoviridae	Unassigned	preVC_289	Clustered	VC_289_1	6	0.1567	1	7.48795	0.1567	0.8667	1	1	1	1	1	1
Enterobacteria~phage~phi80	Heunggongvirae	Uroviricota	Caudoviricetes	Caudovirales	Siphoviridae	Unassigned	preVC_289	Clustered	VC_289_0	4	0.1091	0.999966	7.17177	0.1091	1	1	1	1	1	1	1
Enterobacteria~phage~phi92	Heunggongvirae	Uroviricota	Caudoviricetes	Caudovirales	Myoviridae	Unassigned	preVC_106	Clustered	VC_106_0	6	0.1659	0.999993	5.92869	0.1659	1	1	1	1	1	1	0
Enterobacteria~phage~phiJLA23	Heunggongvirae	Uroviricota	Caudoviricetes	Caudovirales	Drexlerviridae	Rogunavirus	preVC_325	Clustered	VC_325_0	19	0.6449	1	5.56753	0.6449	1	1	1	1	1	1	9
Enterobacteria~phage~phiP27	Heunggongvirae	Uroviricota	Caudoviricetes	Caudovirales	Myoviridae	Unassigned		Overlap (VC_125/VC_290)
Enterobacteria~phage~vB_EcoM_IME281	Heunggongvirae	Uroviricota	Caudoviricetes	Caudovirales	Myoviridae	Dhakavirus	preVC_59	Clustered	VC_59_1	10	0.0984	1	7.81971	0.0984	0.9333	1	1	1	1	1	1
Enterobacteria~phage~vB_EcoM_IME339	Heunggongvirae	Uroviricota	Caudoviricetes	Caudovirales	Myoviridae	Tequatrovirus	preVC_56	Clustered/Singleton	VC_56_4	1	0	0	0	0	1	1	1	1	1	1	1
Enterobacteria~phage~vB_EcoM_IME340	Heunggongvirae	Uroviricota	Caudoviricetes	Caudovirales	Myoviridae	Tequatrovirus	preVC_56	Clustered/Singleton	VC_56_61	1	0	0	0	0	1	1	1	1	1	1	1
Enterobacteria~phage~vB_EcoM_IME341	Heunggongvirae	Uroviricota	Caudoviricetes	Caudovirales	Myoviridae	Dhakavirus	preVC_59	Clustered	VC_59_1	10	0.0984	1	7.81971	0.0984	0.9333	1	1	1	1	1	1
Enterobacteria~phage~vB_EcoP_IME390	Heunggongvirae	Uroviricota	Caudoviricetes	Caudovirales	Autographiviridae	Teseptimavirus	preVC_328	Clustered	VC_328_0	64	0.8177	1	6.73071	0.8177	0.999	1	1	1	1	1	11
Enterobacteria~phage~vB_EcoS_IME18	Heunggongvirae	Uroviricota	Caudoviricetes	Caudovirales	Drexlerviridae	Tunavirus	preVC_324	Clustered	VC_324_0	18	0.5327	1	4.9396	0.5327	1	1	1	1	1	1	3
Enterobacteria~phage~vB_EcoS_Rogue1	Heunggongvirae	Uroviricota	Caudoviricetes	Caudovirales	Drexlerviridae	Rogunavirus	preVC_325	Clustered	VC_325_0	19	0.6449	1	5.56753	0.6449	1	1	1	1	1	1	9
Enterobacter~phage~Arya	Heunggongvirae	Uroviricota	Caudoviricetes	Caudovirales	Myoviridae	Jilinvirus	preVC_20	Clustered	VC_20_0	8	0.4772	1	5.44201	0.4772	1	1	1	1	1	1	1
Enterobacter~phage~CC31	Heunggongvirae	Uroviricota	Caudoviricetes	Caudovirales	Myoviridae	Karamvirus		Overlap (VC_56/VC_60)
Enterobacter~phage~E-2	Heunggongvirae	Uroviricota	Caudoviricetes	Caudovirales	Autographiviridae	Teetrevirus	preVC_328	Clustered	VC_328_0	64	0.8177	1	6.73071	0.8177	0.999	1	1	1	1	1	11
Enterobacter~phage~E-3	Heunggongvirae	Uroviricota	Caudoviricetes	Caudovirales	Autographiviridae	Teetrevirus	preVC_328	Clustered	VC_328_0	64	0.8177	1	6.73071	0.8177	0.999	1	1	1	1	1	11
Enterobacter~phage~EcP1	Heunggongvirae	Uroviricota	Caudoviricetes	Caudovirales	Schitoviridae	Eceepunavirus		Outlier
Enterobacter~phage~Ec_L1	Heunggongvirae	Uroviricota	Caudoviricetes	Caudovirales	Drexlerviridae	Eclunavirus		Outlier
Enterobacter~phage~EcpYZU01	Heunggongvirae	Uroviricota	Caudoviricetes	Caudovirales	Autographiviridae	Kayfunavirus	preVC_327	Clustered	VC_327_0	20	0.7348	1	4.47304	0.7348	1	1	1	1	1	1	1
Enterobacter~phage~Enc34	Heunggongvirae	Uroviricota	Caudoviricetes	Caudovirales	Siphoviridae	Unassigned	preVC_33	Clustered	VC_33_0	38	0.7037	1	4.08522	0.7037	1	1	1	1	1	2	1
Enterobacter~phage~EspM4VN	Heunggongvirae	Uroviricota	Caudoviricetes	Caudovirales	Ackermannviridae	Agtrevirus	preVC_50	Clustered	VC_50_2	7	0.0531	0.96954	7.31949	0.0515	1	1	1	1	1	1	2
Enterobacter~phage~F20	Heunggongvirae	Uroviricota	Caudoviricetes	Caudovirales	Drexlerviridae	Webervirus	preVC_326	Clustered	VC_326_0	35	0.9687	1	4.65682	0.9687	1	1	1	1	1	1	1
Enterobacter~phage~KNP3	Heunggongvirae	Uroviricota	Caudoviricetes	Caudovirales	Autographiviridae	Teetrevirus	preVC_328	Clustered	VC_328_0	64	0.8177	1	6.73071	0.8177	0.999	1	1	1	1	1	11
Enterobacter~phage~KNP7	Heunggongvirae	Uroviricota	Caudoviricetes	Caudovirales	Siphoviridae	Chivirus	preVC_33	Clustered	VC_33_0	38	0.7037	1	4.08522	0.7037	1	1	1	1	1	2	1
Enterobacter~phage~PG7	Heunggongvirae	Uroviricota	Caudoviricetes	Caudovirales	Myoviridae	Karamvirus		Overlap (VC_56/VC_60)
Enterobacter~phage~Tyrion	Heunggongvirae	Uroviricota	Caudoviricetes	Caudovirales	Podoviridae	Uetakevirus	preVC_272	Clustered	VC_272_0	5	0.6958	0.999999	5.41367	0.6958	1	1	1	1	1	1	1
Enterobacter~phage~myPSH1140	Heunggongvirae	Uroviricota	Caudoviricetes	Caudovirales	Myoviridae	Karamvirus		Overlap (VC_56/VC_60)
Enterobacter~phage~phiEap-1	Heunggongvirae	Uroviricota	Caudoviricetes	Caudovirales	Autographiviridae	Eapunavirus		Outlier
Enterobacter~phage~phiEap-2	Heunggongvirae	Uroviricota	Caudoviricetes	Caudovirales	Siphoviridae	Cornellvirus	preVC_397	Clustered	VC_397_0	24	0.8702	1	5.52978	0.8702	1	1	1	1	1	1	3
Enterobacter~phage~phiEap-3	Heunggongvirae	Uroviricota	Caudoviricetes	Caudovirales	Myoviridae	Slopekvirus	preVC_93	Clustered	VC_93_0	7	0.1721	1	5.65252	0.1721	1	1	1	1	1	1	1
Enterobacter~phage~phiKDA1	Heunggongvirae	Uroviricota	Caudoviricetes	Caudovirales	Autographiviridae	Koutsourovirus	preVC_390	Clustered	VC_390_0	21	0.7337	1	4.68128	0.7337	1	1	1	1	1	1	3
Enterobacter~phage~phiT5282H	Heunggongvirae	Uroviricota	Caudoviricetes	Caudovirales	Myoviridae	Novemvirus		Overlap (VC_177/VC_178)
Enterobacter~phage~vB_EclM_CIP9	Heunggongvirae	Uroviricota	Caudoviricetes	Caudovirales	Myoviridae	Kanagawavirus		Overlap (VC_56/VC_60)
Enterococcus~phage~9183	Heunggongvirae	Uroviricota	Caudoviricetes	Caudovirales	Siphoviridae	Unassigned	preVC_407	Clustered	VC_407_0	3	0.5694	0.99972	6.05454	0.5692	1	1	1	1	1	1	0
Enterococcus~phage~AE4_17	Heunggongvirae	Uroviricota	Caudoviricetes	Caudovirales	Rountreeviridae	Copernicusvirus	preVC_410	Clustered	VC_410_0	12	0.6941	1	2.16705	0.6941	1	1	1	1	1	1	1
Enterococcus~phage~AUEF3	Heunggongvirae	Uroviricota	Caudoviricetes	Caudovirales	Siphoviridae	Efquatrovirus	preVC_381	Clustered	VC_381_0	16	0.8935	1	5.42373	0.8935	1	1	1	1	1	1	1
Enterococcus~phage~BC611	Heunggongvirae	Uroviricota	Caudoviricetes	Caudovirales	Siphoviridae	Saphexavirus	preVC_246	Clustered	VC_246_0	6	0.8801	1	6.01967	0.8801	1	1	1	1	1	1	1
Enterococcus~phage~ECP3	Heunggongvirae	Uroviricota	Caudoviricetes	Caudovirales	Herelleviridae	Kochikohdavirus		Overlap (VC_222/VC_238)
Enterococcus~phage~EF24C	Heunggongvirae	Uroviricota	Caudoviricetes	Caudovirales	Herelleviridae	Kochikohdavirus		Overlap (VC_222/VC_238)
Enterococcus~phage~EF62phi	Heunggongvirae	Uroviricota	Caudoviricetes	Caudovirales	Podoviridae	Unassigned		Singleton
Enterococcus~phage~EFDG1	Heunggongvirae	Uroviricota	Caudoviricetes	Caudovirales	Herelleviridae	Schiekvirus		Overlap (VC_222/VC_238)
Enterococcus~phage~EFLK1	Heunggongvirae	Uroviricota	Caudoviricetes	Caudovirales	Herelleviridae	Kochikohdavirus		Overlap (VC_222/VC_238)
Enterococcus~phage~EFP01	Heunggongvirae	Uroviricota	Caudoviricetes	Caudovirales	Herelleviridae	Schiekvirus		Overlap (VC_222/VC_238)
Enterococcus~phage~Ec-ZZ2	Heunggongvirae	Uroviricota	Caudoviricetes	Caudovirales	Siphoviridae	Efquatrovirus	preVC_381	Clustered	VC_381_0	16	0.8935	1	5.42373	0.8935	1	1	1	1	1	1	1
Enterococcus~phage~EfV12-phi1	Heunggongvirae	Uroviricota	Caudoviricetes	Caudovirales	Herelleviridae	Schiekvirus		Overlap (VC_222/VC_238)
Enterococcus~phage~EfaCPT1	Heunggongvirae	Uroviricota	Caudoviricetes	Caudovirales	Siphoviridae	Efquatrovirus	preVC_381	Clustered	VC_381_0	16	0.8935	1	5.42373	0.8935	1	1	1	1	1	1	1
Enterococcus~phage~IME-EF4	Heunggongvirae	Uroviricota	Caudoviricetes	Caudovirales	Siphoviridae	Efquatrovirus	preVC_381	Clustered	VC_381_0	16	0.8935	1	5.42373	0.8935	1	1	1	1	1	1	1
Enterococcus~phage~IME-EFm1	Heunggongvirae	Uroviricota	Caudoviricetes	Caudovirales	Siphoviridae	Unassigned	preVC_381	Clustered	VC_381_0	16	0.8935	1	5.42373	0.8935	1	1	1	1	1	1	1
Enterococcus~phage~IME-EFm5	Heunggongvirae	Uroviricota	Caudoviricetes	Caudovirales	Siphoviridae	Unassigned	preVC_381	Clustered	VC_381_0	16	0.8935	1	5.42373	0.8935	1	1	1	1	1	1	1
Enterococcus~phage~IMEEF1	Heunggongvirae	Uroviricota	Caudoviricetes	Caudovirales	Siphoviridae	Saphexavirus	preVC_246	Clustered	VC_246_0	6	0.8801	1	6.01967	0.8801	1	1	1	1	1	1	1
Enterococcus~phage~IME_EF3	Heunggongvirae	Uroviricota	Caudoviricetes	Caudovirales	Siphoviridae	Efquatrovirus	preVC_381	Clustered	VC_381_0	16	0.8935	1	5.42373	0.8935	1	1	1	1	1	1	1
Enterococcus~phage~Idefix	Heunggongvirae	Uroviricota	Caudoviricetes	Caudovirales	Rountreeviridae	Copernicusvirus	preVC_410	Clustered	VC_410_0	12	0.6941	1	2.16705	0.6941	1	1	1	1	1	1	1
Enterococcus~phage~LY0322	Heunggongvirae	Uroviricota	Caudoviricetes	Caudovirales	Siphoviridae	Efquatrovirus	preVC_381	Clustered	VC_381_0	16	0.8935	1	5.42373	0.8935	1	1	1	1	1	1	1
Enterococcus~phage~PMBT2	Heunggongvirae	Uroviricota	Caudoviricetes	Caudovirales	Siphoviridae	Efquatrovirus	preVC_381	Clustered	VC_381_0	16	0.8935	1	5.42373	0.8935	1	1	1	1	1	1	1
Enterococcus~phage~SANTOR1	Heunggongvirae	Uroviricota	Caudoviricetes	Caudovirales	Siphoviridae	Efquatrovirus	preVC_381	Clustered	VC_381_0	16	0.8935	1	5.42373	0.8935	1	1	1	1	1	1	1
Enterococcus~phage~SAP6	Heunggongvirae	Uroviricota	Caudoviricetes	Caudovirales	Siphoviridae	Saphexavirus	preVC_246	Clustered	VC_246_0	6	0.8801	1	6.01967	0.8801	1	1	1	1	1	1	1
Enterococcus~phage~VD13	Heunggongvirae	Uroviricota	Caudoviricetes	Caudovirales	Siphoviridae	Saphexavirus	preVC_246	Clustered	VC_246_0	6	0.8801	1	6.01967	0.8801	1	1	1	1	1	1	1
Enterococcus~phage~nattely	Heunggongvirae	Uroviricota	Caudoviricetes	Caudovirales	Siphoviridae	Unassigned	preVC_407	Clustered	VC_407_0	3	0.5694	0.99972	6.05454	0.5692	1	1	1	1	1	1	0
Enterococcus~phage~phiEF24C-P2	Heunggongvirae	Uroviricota	Caudoviricetes	Caudovirales	Herelleviridae	Kochikohdavirus		Overlap (VC_222/VC_238)
Enterococcus~phage~phiFL2A	Heunggongvirae	Uroviricota	Caudoviricetes	Caudovirales	Siphoviridae	Phifelvirus	preVC_136	Clustered	VC_136_0	3	0.4736	0.994448	6.40749	0.471	1	1	1	1	1	1	1
Enterococcus~phage~phiSHEF2	Heunggongvirae	Uroviricota	Caudoviricetes	Caudovirales	Siphoviridae	Efquatrovirus	preVC_381	Clustered	VC_381_0	16	0.8935	1	5.42373	0.8935	1	1	1	1	1	1	1
Enterococcus~phage~phiSHEF4	Heunggongvirae	Uroviricota	Caudoviricetes	Caudovirales	Siphoviridae	Efquatrovirus	preVC_381	Clustered	VC_381_0	16	0.8935	1	5.42373	0.8935	1	1	1	1	1	1	1
Enterococcus~phage~phiSHEF5	Heunggongvirae	Uroviricota	Caudoviricetes	Caudovirales	Siphoviridae	Efquatrovirus	preVC_381	Clustered	VC_381_0	16	0.8935	1	5.42373	0.8935	1	1	1	1	1	1	1
Enterococcus~phage~vB_EfaP_Ef6.2	Heunggongvirae	Uroviricota	Caudoviricetes	Caudovirales	Rountreeviridae	Copernicusvirus	preVC_410	Clustered	VC_410_0	12	0.6941	1	2.16705	0.6941	1	1	1	1	1	1	1
Enterococcus~phage~vB_EfaP_Ef6.3	Heunggongvirae	Uroviricota	Caudoviricetes	Caudovirales	Rountreeviridae	Copernicusvirus	preVC_410	Clustered	VC_410_0	12	0.6941	1	2.16705	0.6941	1	1	1	1	1	1	1
Enterococcus~phage~vB_EfaP_Ef7.2	Heunggongvirae	Uroviricota	Caudoviricetes	Caudovirales	Rountreeviridae	Copernicusvirus	preVC_410	Clustered	VC_410_0	12	0.6941	1	2.16705	0.6941	1	1	1	1	1	1	1
Enterococcus~phage~vB_EfaP_Ef7.3	Heunggongvirae	Uroviricota	Caudoviricetes	Caudovirales	Rountreeviridae	Copernicusvirus	preVC_410	Clustered	VC_410_0	12	0.6941	1	2.16705	0.6941	1	1	1	1	1	1	1
Enterococcus~phage~vB_EfaP_Ef7.4	Heunggongvirae	Uroviricota	Caudoviricetes	Caudovirales	Rountreeviridae	Copernicusvirus	preVC_410	Clustered	VC_410_0	12	0.6941	1	2.16705	0.6941	1	1	1	1	1	1	1
Enterococcus~phage~vB_EfaP_Efmus1	Heunggongvirae	Uroviricota	Caudoviricetes	Caudovirales	Rountreeviridae	Copernicusvirus	preVC_410	Clustered	VC_410_0	12	0.6941	1	2.16705	0.6941	1	1	1	1	1	1	1
Enterococcus~phage~vB_EfaP_Efmus3	Heunggongvirae	Uroviricota	Caudoviricetes	Caudovirales	Rountreeviridae	Copernicusvirus	preVC_410	Clustered	VC_410_0	12	0.6941	1	2.16705	0.6941	1	1	1	1	1	1	1
Enterococcus~phage~vB_EfaP_Efmus4	Heunggongvirae	Uroviricota	Caudoviricetes	Caudovirales	Rountreeviridae	Copernicusvirus	preVC_410	Clustered	VC_410_0	12	0.6941	1	2.16705	0.6941	1	1	1	1	1	1	1
Enterococcus~phage~vB_EfaP_IME195	Heunggongvirae	Uroviricota	Caudoviricetes	Caudovirales	Rountreeviridae	Copernicusvirus	preVC_410	Clustered	VC_410_0	12	0.6941	1	2.16705	0.6941	1	1	1	1	1	1	1
Enterococcus~phage~vB_EfaP_IME199	Heunggongvirae	Uroviricota	Caudoviricetes	Caudovirales	Rountreeviridae	Minhovirus	preVC_411	Clustered	VC_411_0	2	0.0742	0.910588	1.41421	0.0676	1	1	1	1	1	1	1
Enterococcus~phage~vB_EfaP_Zip	Heunggongvirae	Uroviricota	Caudoviricetes	Caudovirales	Rountreeviridae	Minhovirus	preVC_411	Clustered	VC_411_0	2	0.0742	0.910588	1.41421	0.0676	1	1	1	1	1	1	1
Enterococcus~phage~vB_EfaS_AL2	Heunggongvirae	Uroviricota	Caudoviricetes	Caudovirales	Siphoviridae	Efquatrovirus	preVC_381	Clustered	VC_381_0	16	0.8935	1	5.42373	0.8935	1	1	1	1	1	1	1
Enterococcus~phage~vB_EfaS_AL3	Heunggongvirae	Uroviricota	Caudoviricetes	Caudovirales	Siphoviridae	Efquatrovirus	preVC_381	Clustered	VC_381_0	16	0.8935	1	5.42373	0.8935	1	1	1	1	1	1	1
Enterococcus~phage~vB_EfaS_IME196	Heunggongvirae	Uroviricota	Caudoviricetes	Caudovirales	Siphoviridae	Efquatrovirus	preVC_381	Clustered	VC_381_0	16	0.8935	1	5.42373	0.8935	1	1	1	1	1	1	1
Enterococcus~phage~vB_EfaS_IME198	Heunggongvirae	Uroviricota	Caudoviricetes	Caudovirales	Siphoviridae	Saphexavirus	preVC_246	Clustered	VC_246_0	6	0.8801	1	6.01967	0.8801	1	1	1	1	1	1	1
Enterococcus~phage~vB_Efae230P-4	Heunggongvirae	Uroviricota	Caudoviricetes	Caudovirales	Rountreeviridae	Copernicusvirus	preVC_410	Clustered	VC_410_0	12	0.6941	1	2.16705	0.6941	1	1	1	1	1	1	1
Enterococus~phage~vipetofem	Heunggongvirae	Uroviricota	Caudoviricetes	Caudovirales	Siphoviridae	Unassigned	preVC_407	Clustered	VC_407_0	3	0.5694	0.99972	6.05454	0.5692	1	1	1	1	1	1	0
Erwinia~phage~Cronus	Heunggongvirae	Uroviricota	Caudoviricetes	Caudovirales	Myoviridae	Unassigned		Overlap (VC_56/VC_60)
Erwinia~phage~Derbicus	Heunggongvirae	Uroviricota	Caudoviricetes	Caudovirales	Myoviridae	Derbicusvirus	preVC_355	Clustered	VC_355_0	4	0.1422	0.999963	3.73649	0.1421	1	1	1	1	1	1	1
Erwinia~phage~ENT90	Heunggongvirae	Uroviricota	Caudoviricetes	Caudovirales	Myoviridae	Entnonagintavirus	preVC_177	Clustered	VC_177_0	34	0.6033	1	5.21949	0.6033	1	1	1	1	1	1	6
Erwinia~phage~Ea35-70	Heunggongvirae	Uroviricota	Caudoviricetes	Caudovirales	Myoviridae	Agricanvirus	preVC_356	Clustered	VC_356_0	6	0.4278	1	2.71985	0.4278	1	1	1	1	1	1	1
Erwinia~phage~Ea9-2	Heunggongvirae	Uroviricota	Caudoviricetes	Caudovirales	Schitoviridae	Johnsonvirus	preVC_8	Clustered	VC_8_0	27	0.7083	1	7.98326	0.7083	0.7094	1	1	1	1	1	14
Erwinia~phage~Era103	Heunggongvirae	Uroviricota	Caudoviricetes	Caudovirales	Autographiviridae	Eracentumvirus		Overlap (VC_339/VC_340)
Erwinia~phage~EtG	Heunggongvirae	Uroviricota	Caudoviricetes	Caudovirales	Myoviridae	Eganvirus	preVC_177	Clustered	VC_177_0	34	0.6033	1	5.21949	0.6033	1	1	1	1	1	1	6
Erwinia~phage~FE44	Heunggongvirae	Uroviricota	Caudoviricetes	Caudovirales	Autographiviridae	Berlinvirus	preVC_328	Clustered	VC_328_0	64	0.8177	1	6.73071	0.8177	0.999	1	1	1	1	1	11
Erwinia~phage~Faunus	Heunggongvirae	Uroviricota	Caudoviricetes	Caudovirales	Chaseviridae	Faunusvirus	preVC_118	Clustered	VC_118_0	12	0.8618	1	6.12113	0.8618	1	1	1	1	1	2	6
Erwinia~phage~Hena1	Heunggongvirae	Uroviricota	Caudoviricetes	Caudovirales	Myoviridae	Henunavirus	preVC_102	Clustered	VC_102_0	2	0.0334	0.909245	5.65685	0.0304	1	1	1	1	1	1	1
Erwinia~phage~Machina	Heunggongvirae	Uroviricota	Caudoviricetes	Caudovirales	Myoviridae	Machinavirus	preVC_355	Clustered	VC_355_3	2	0.0412	0.815161	2.44949	0.0336	1	1	1	1	1	1	1
Erwinia~phage~PEp14	Heunggongvirae	Uroviricota	Caudoviricetes	Caudovirales	Podoviridae	Unassigned		Overlap (VC_292/VC_293)
Erwinia~phage~PhiEaH1	Heunggongvirae	Uroviricota	Caudoviricetes	Caudovirales	Myoviridae	Iapetusvirus		Overlap (VC_358/VC_359)
Erwinia~phage~Wellington	Heunggongvirae	Uroviricota	Caudoviricetes	Caudovirales	Myoviridae	Wellingtonvirus	preVC_355	Clustered	VC_355_1	2	0.0419	0.806776	2	0.0338	1	1	1	1	1	1	1
Erwinia~phage~pEp_SNUABM_01	Heunggongvirae	Uroviricota	Caudoviricetes	Caudovirales	Myoviridae	Henunavirus	preVC_102	Clustered	VC_102_0	2	0.0334	0.909245	5.65685	0.0304	1	1	1	1	1	1	1
Erwinia~phage~pEp_SNUABM_08	Heunggongvirae	Uroviricota	Caudoviricetes	Caudovirales	Siphoviridae	Unassigned		Outlier
Erwinia~phage~phiEa100	Heunggongvirae	Uroviricota	Caudoviricetes	Caudovirales	Autographiviridae	Eracentumvirus		Overlap (VC_339/VC_340)
Erwinia~phage~phiEa104	Heunggongvirae	Uroviricota	Caudoviricetes	Caudovirales	Myoviridae	Kolesnikvirus	preVC_130	Clustered	VC_130_0	3	0.0871	0.996465	2.03175	0.0868	1	1	1	1	1	1	1
Erwinia~phage~phiEa21-4	Heunggongvirae	Uroviricota	Caudoviricetes	Caudovirales	Myoviridae	Kolesnikvirus	preVC_130	Clustered	VC_130_0	3	0.0871	0.996465	2.03175	0.0868	1	1	1	1	1	1	1
Erwinia~phage~phiEa2809	Heunggongvirae	Uroviricota	Caudoviricetes	Caudovirales	Ackermannviridae	Nezavisimistyvirus	preVC_50	Clustered	VC_50_4	2	0.0097	0.911859	5.2915	0.0088	1	1	1	1	1	1	1
Erwinia~phage~phiEaH2	Heunggongvirae	Uroviricota	Caudoviricetes	Caudovirales	Myoviridae	Erskinevirus	preVC_355	Clustered	VC_355_2	3	0.0866	0.982554	6.32912	0.0851	1	1	1	1	1	1	2
Erwinia~phage~phiEaP8	Heunggongvirae	Uroviricota	Caudoviricetes	Caudovirales	Schitoviridae	Yonginvirus	preVC_8	Clustered	VC_8_0	27	0.7083	1	7.98326	0.7083	0.7094	1	1	1	1	1	14
Erwinia~phage~phiEt88	Heunggongvirae	Uroviricota	Caudoviricetes	Caudovirales	Myoviridae	Unassigned		Outlier
Erwinia~phage~vB_Eam-MM7	Heunggongvirae	Uroviricota	Caudoviricetes	Caudovirales	Myoviridae	Kolesnikvirus	preVC_130	Clustered	VC_130_0	3	0.0871	0.996465	2.03175	0.0868	1	1	1	1	1	1	1
Erwinia~phage~vB_EamM-Bue1	Heunggongvirae	Uroviricota	Caudoviricetes	Caudovirales	Ackermannviridae	Nezavisimistyvirus	preVC_50	Clustered	VC_50_4	2	0.0097	0.911859	5.2915	0.0088	1	1	1	1	1	1	1
Erwinia~phage~vB_EamM-Y2	Heunggongvirae	Uroviricota	Caudoviricetes	Caudovirales	Chaseviridae	Loessnervirus	preVC_118	Clustered	VC_118_0	12	0.8618	1	6.12113	0.8618	1	1	1	1	1	2	6
Erwinia~phage~vB_EamM_Alexandra	Heunggongvirae	Uroviricota	Caudoviricetes	Caudovirales	Myoviridae	Alexandravirus	preVC_26	Clustered	VC_26_1	3	0.225	0.98472	6.80217	0.2216	1	1	1	1	1	1	2
Erwinia~phage~vB_EamM_Asesino	Heunggongvirae	Uroviricota	Caudoviricetes	Caudovirales	Myoviridae	Erskinevirus	preVC_355	Clustered	VC_355_2	3	0.0866	0.982554	6.32912	0.0851	1	1	1	1	1	1	2
Erwinia~phage~vB_EamM_Caitlin	Heunggongvirae	Uroviricota	Caudoviricetes	Caudovirales	Myoviridae	Machinavirus	preVC_355	Clustered	VC_355_4	2	0.0413	0.813181	4.79583	0.0336	1	1	1	1	1	1	1
Erwinia~phage~vB_EamM_ChrisDB	Heunggongvirae	Uroviricota	Caudoviricetes	Caudovirales	Myoviridae	Machinavirus	preVC_355	Clustered	VC_355_4	2	0.0413	0.813181	4.79583	0.0336	1	1	1	1	1	1	1
Erwinia~phage~vB_EamM_Deimos-Minion	Heunggongvirae	Uroviricota	Caudoviricetes	Caudovirales	Myoviridae	Agricanvirus	preVC_356	Clustered	VC_356_0	6	0.4278	1	2.71985	0.4278	1	1	1	1	1	1	1
Erwinia~phage~vB_EamM_Desertfox	Heunggongvirae	Uroviricota	Caudoviricetes	Caudovirales	Myoviridae	Agricanvirus	preVC_356	Clustered	VC_356_0	6	0.4278	1	2.71985	0.4278	1	1	1	1	1	1	1
Erwinia~phage~vB_EamM_EarlPhillipIV	Heunggongvirae	Uroviricota	Caudoviricetes	Caudovirales	Myoviridae	Derbicusvirus	preVC_355	Clustered	VC_355_0	4	0.1422	0.999963	3.73649	0.1421	1	1	1	1	1	1	1
Erwinia~phage~vB_EamM_Huxley	Heunggongvirae	Uroviricota	Caudoviricetes	Caudovirales	Myoviridae	Machinavirus	preVC_355	Clustered	VC_355_3	2	0.0412	0.815161	2.44949	0.0336	1	1	1	1	1	1	1
Erwinia~phage~vB_EamM_Kwan	Heunggongvirae	Uroviricota	Caudoviricetes	Caudovirales	Myoviridae	Wellingtonvirus	preVC_355	Clustered	VC_355_1	2	0.0419	0.806776	2	0.0338	1	1	1	1	1	1	1
Erwinia~phage~vB_EamM_Phobos	Heunggongvirae	Uroviricota	Caudoviricetes	Caudovirales	Myoviridae	Derbicusvirus	preVC_355	Clustered	VC_355_0	4	0.1422	0.999963	3.73649	0.1421	1	1	1	1	1	1	1
Erwinia~phage~vB_EamM_RAY	Heunggongvirae	Uroviricota	Caudoviricetes	Caudovirales	Myoviridae	Agricanvirus	preVC_356	Clustered	VC_356_0	6	0.4278	1	2.71985	0.4278	1	1	1	1	1	1	1
Erwinia~phage~vB_EamM_RisingSun	Heunggongvirae	Uroviricota	Caudoviricetes	Caudovirales	Myoviridae	Risingsunvirus	preVC_354	Clustered	VC_354_1	2	0.0571	0.907846	7.54983	0.0518	1	1	1	1	1	1	2
Erwinia~phage~vB_EamM_Simmy50	Heunggongvirae	Uroviricota	Caudoviricetes	Caudovirales	Myoviridae	Agricanvirus	preVC_356	Clustered	VC_356_0	6	0.4278	1	2.71985	0.4278	1	1	1	1	1	1	1
Erwinia~phage~vB_EamM_Special~G	Heunggongvirae	Uroviricota	Caudoviricetes	Caudovirales	Myoviridae	Agricanvirus	preVC_356	Clustered	VC_356_0	6	0.4278	1	2.71985	0.4278	1	1	1	1	1	1	1
Erwinia~phage~vB_EamM_Y3	Heunggongvirae	Uroviricota	Caudoviricetes	Caudovirales	Myoviridae	Sasquatchvirus	preVC_26	Clustered	VC_26_1	3	0.225	0.98472	6.80217	0.2216	1	1	1	1	1	1	2
Erwinia~phage~vB_EamM_Yoloswag	Heunggongvirae	Uroviricota	Caudoviricetes	Caudovirales	Myoviridae	Yoloswagvirus	preVC_26	Clustered/Singleton	VC_26_2	1	0	0	0	0	1	1	1	1	1	1	1
Erwinia~phage~vB_EamP-L1	Heunggongvirae	Uroviricota	Caudoviricetes	Caudovirales	Autographiviridae	Elunavirus	preVC_328	Clustered	VC_328_0	64	0.8177	1	6.73071	0.8177	0.999	1	1	1	1	1	11
Erwinia~phage~vB_EamP-S2	Heunggongvirae	Uroviricota	Caudoviricetes	Caudovirales	Autographiviridae	Eracentumvirus		Overlap (VC_339/VC_340)
Erwinia~phage~vB_EamP-S6	Heunggongvirae	Uroviricota	Caudoviricetes	Caudovirales	Schitoviridae	Waedenswilvirus		Outlier
Erwinia~phage~vB_EamP_Frozen	Heunggongvirae	Uroviricota	Caudoviricetes	Caudovirales	Schitoviridae	Johnsonvirus	preVC_8	Clustered	VC_8_0	27	0.7083	1	7.98326	0.7083	0.7094	1	1	1	1	1	14
Erwinia~phage~vB_EhrS_49	Heunggongvirae	Uroviricota	Caudoviricetes	Caudovirales	Siphoviridae	Feofaniavirus		Outlier
Erwinia~phage~vB_EhrS_59	Heunggongvirae	Uroviricota	Caudoviricetes	Caudovirales	Siphoviridae	Feofaniavirus		Outlier
Erysipelothrix~phage~SE-1	Heunggongvirae	Uroviricota	Caudoviricetes	Caudovirales	Siphoviridae	Unassigned		Outlier
Escherichia~Stx1~converting~phage	Heunggongvirae	Uroviricota	Caudoviricetes	Caudovirales	Podoviridae	Traversvirus	preVC_361	Clustered	VC_361_0	2	0.0404	0.912278	2.44949	0.0369	1	1	1	1	1	1	1
Escherichia~coli~O157~typing~phage~3	Heunggongvirae	Uroviricota	Caudoviricetes	Caudovirales	Myoviridae	Mosigvirus	preVC_57	Clustered	VC_57_0	17	0.1836	1	6.97356	0.1836	0.9485	1	1	1	1	1	2
Escherichia~coli~O157~typing~phage~6	Heunggongvirae	Uroviricota	Caudoviricetes	Caudovirales	Myoviridae	Mosigvirus	preVC_57	Clustered	VC_57_0	17	0.1836	1	6.97356	0.1836	0.9485	1	1	1	1	1	2
Escherichia~phage~121Q	Heunggongvirae	Uroviricota	Caudoviricetes	Caudovirales	Myoviridae	Asteriusvirus	preVC_128	Clustered	VC_128_4	2	0.0902	0.860422	4.79583	0.0776	1	1	1	1	1	1	1
Escherichia~phage~13a	Heunggongvirae	Uroviricota	Caudoviricetes	Caudovirales	Autographiviridae	Teseptimavirus	preVC_328	Clustered	VC_328_0	64	0.8177	1	6.73071	0.8177	0.999	1	1	1	1	1	11
Escherichia~phage~172-1	Heunggongvirae	Uroviricota	Caudoviricetes	Caudovirales	Podoviridae	Kuravirus	preVC_108	Clustered	VC_108_0	6	0.6707	1	6.20173	0.6707	1	1	1	1	1	1	1
Escherichia~phage~186	Heunggongvirae	Uroviricota	Caudoviricetes	Caudovirales	Myoviridae	Eganvirus	preVC_177	Clustered	VC_177_0	34	0.6033	1	5.21949	0.6033	1	1	1	1	1	1	6
Escherichia~phage~285P	Heunggongvirae	Uroviricota	Caudoviricetes	Caudovirales	Autographiviridae	Berlinvirus	preVC_328	Clustered	VC_328_0	64	0.8177	1	6.73071	0.8177	0.999	1	1	1	1	1	11
Escherichia~phage~2H10	Heunggongvirae	Uroviricota	Caudoviricetes	Caudovirales	Siphoviridae	Glaedevirus	preVC_289	Clustered	VC_289_1	6	0.1567	1	7.48795	0.1567	0.8667	1	1	1	1	1	1
Escherichia~phage~4MG	Heunggongvirae	Uroviricota	Caudoviricetes	Caudovirales	Myoviridae	Seunavirus	preVC_102	Clustered	VC_102_4	2	0.0303	0.841837	5.91608	0.0255	1	1	1	1	1	1	1
Escherichia~phage~500465-1	Heunggongvirae	Uroviricota	Caudoviricetes	Caudovirales	Myoviridae	Felsduovirus	preVC_177	Clustered	VC_177_0	34	0.6033	1	5.21949	0.6033	1	1	1	1	1	1	6
Escherichia~phage~500465-2	Heunggongvirae	Uroviricota	Caudoviricetes	Caudovirales	Myoviridae	Xuanwuvirus		Overlap (VC_177/VC_178)
Escherichia~phage~503458	Heunggongvirae	Uroviricota	Caudoviricetes	Caudovirales	Myoviridae	Xuanwuvirus		Overlap (VC_177/VC_178)
Escherichia~phage~520873	Heunggongvirae	Uroviricota	Caudoviricetes	Caudovirales	Myoviridae	Xuanwuvirus		Overlap (VC_177/VC_178)
Escherichia~phage~64795_ec1	Heunggongvirae	Uroviricota	Caudoviricetes	Caudovirales	Autographiviridae	Teseptimavirus	preVC_328	Clustered	VC_328_0	64	0.8177	1	6.73071	0.8177	0.999	1	1	1	1	1	11
Escherichia~phage~933W	Heunggongvirae	Uroviricota	Caudoviricetes	Caudovirales	Podoviridae	Traversvirus	preVC_361	Clustered	VC_361_1	23	0.614	1	7.6319	0.614	0.8814	1	1	1	1	1	3
Escherichia~phage~ADB-2	Heunggongvirae	Uroviricota	Caudoviricetes	Caudovirales	Drexlerviridae	Tunavirus	preVC_324	Clustered	VC_324_0	18	0.5327	1	4.9396	0.5327	1	1	1	1	1	1	3
Escherichia~phage~APCEc01	Heunggongvirae	Uroviricota	Caudoviricetes	Caudovirales	Myoviridae	Mosigvirus	preVC_57	Clustered	VC_57_0	17	0.1836	1	6.97356	0.1836	0.9485	1	1	1	1	1	2
Escherichia~phage~APECc02	Heunggongvirae	Uroviricota	Caudoviricetes	Caudovirales	Myoviridae	Vequintavirus		Overlap (VC_103/VC_104)
Escherichia~phage~AR1	Heunggongvirae	Uroviricota	Caudoviricetes	Caudovirales	Myoviridae	Tequatrovirus	preVC_56	Clustered/Singleton	VC_56_51	1	0	0	0	0	1	1	1	1	1	1	1
Escherichia~phage~AnYang	Heunggongvirae	Uroviricota	Caudoviricetes	Caudovirales	Myoviridae	Dhakavirus	preVC_59	Clustered/Singleton	VC_59_2	1	0	0	0	0	1	1	1	1	1	1	1
Escherichia~phage~ArgO145	Heunggongvirae	Uroviricota	Caudoviricetes	Caudovirales	Podoviridae	Oslovirus	preVC_361	Clustered	VC_361_1	23	0.614	1	7.6319	0.614	0.8814	1	1	1	1	1	3
Escherichia~phage~Av-05	Heunggongvirae	Uroviricota	Caudoviricetes	Caudovirales	Myoviridae	Avunavirus	preVC_102	Clustered/Singleton	VC_102_5	1	0	0	0	0	1	1	1	1	1	1	1
Escherichia~phage~BA14	Heunggongvirae	Uroviricota	Caudoviricetes	Caudovirales	Autographiviridae	Berlinvirus	preVC_328	Clustered	VC_328_0	64	0.8177	1	6.73071	0.8177	0.999	1	1	1	1	1	11
Escherichia~phage~Bp4	Heunggongvirae	Uroviricota	Caudoviricetes	Caudovirales	Schitoviridae	Gamaleyavirus	preVC_8	Clustered	VC_8_0	27	0.7083	1	7.98326	0.7083	0.7094	1	1	1	1	1	14
Escherichia~phage~Bp7	Heunggongvirae	Uroviricota	Caudoviricetes	Caudovirales	Myoviridae	Dhakavirus	preVC_59	Clustered	VC_59_1	10	0.0984	1	7.81971	0.0984	0.9333	1	1	1	1	1	1
Escherichia~phage~C1	Heunggongvirae	Uroviricota	Caudoviricetes	Caudovirales	Siphoviridae	Unassigned	preVC_121	Clustered	VC_121_0	24	0.9256	1	7.36638	0.9256	0.9674	1	1	1	1	1	1
Escherichia~phage~C119	Heunggongvirae	Uroviricota	Caudoviricetes	Caudovirales	Drexlerviridae	Rogunavirus	preVC_325	Clustered	VC_325_0	19	0.6449	1	5.56753	0.6449	1	1	1	1	1	1	9
Escherichia~phage~C130_2	Heunggongvirae	Uroviricota	Caudoviricetes	Caudovirales	Podoviridae	Giessenvirus	preVC_261	Clustered	VC_261_0	6	0.702	1	5.94932	0.702	1	1	1	1	1	2	4
Escherichia~phage~C5	Heunggongvirae	Uroviricota	Caudoviricetes	Caudovirales	Autographiviridae	Teseptimavirus	preVC_328	Clustered	VC_328_0	64	0.8177	1	6.73071	0.8177	0.999	1	1	1	1	1	11
Escherichia~phage~CAjan	Heunggongvirae	Uroviricota	Caudoviricetes	Caudovirales	Siphoviridae	Seuratvirus	preVC_3	Clustered	VC_3_0	3	0.2364	0.996414	3.64755	0.2356	1	1	1	1	1	1	1
Escherichia~phage~CICC~80001	Heunggongvirae	Uroviricota	Caudoviricetes	Caudovirales	Autographiviridae	Teseptimavirus	preVC_328	Clustered	VC_328_0	64	0.8177	1	6.73071	0.8177	0.999	1	1	1	1	1	11
Escherichia~phage~Cba120	Heunggongvirae	Uroviricota	Caudoviricetes	Caudovirales	Ackermannviridae	Kuttervirus	preVC_50	Clustered	VC_50_1	40	0.4864	1	7.03745	0.4864	1	1	1	1	1	1	1
Escherichia~phage~D108	Heunggongvirae	Uroviricota	Caudoviricetes	Caudovirales	Myoviridae	Muvirus	preVC_300	Clustered	VC_300_0	3	0.7051	0.99338	1.60948	0.7004	1	1	1	1	1	1	1
Escherichia~phage~D6	Heunggongvirae	Uroviricota	Caudoviricetes	Caudovirales	Myoviridae	Punavirus	preVC_404	Clustered	VC_404_0	6	0.9971	0.997549	7.44173	0.9946	0.8	1	1	1	1	1	1
Escherichia~phage~DE3	Heunggongvirae	Uroviricota	Caudoviricetes	Caudovirales	Siphoviridae	Lambdavirus		Overlap (VC_303/VC_364)
Escherichia~phage~DT571/2	Heunggongvirae	Uroviricota	Caudoviricetes	Caudovirales	Demerecviridae	Tequintavirus	preVC_112	Clustered	VC_112_0	31	0.5988	1	7.58245	0.5988	0.9742	1	1	1	1	1	1
Escherichia~phage~DTL	Heunggongvirae	Uroviricota	Caudoviricetes	Caudovirales	Drexlerviridae	Loudonvirus	preVC_325	Clustered	VC_325_0	19	0.6449	1	5.56753	0.6449	1	1	1	1	1	1	9
Escherichia~phage~E21	Heunggongvirae	Uroviricota	Caudoviricetes	Caudovirales	Siphoviridae	Unassigned	preVC_34	Clustered	VC_34_0	7	0.1372	1	3.75068	0.1372	1	1	1	1	1	1	0
Escherichia~phage~EC1-UPM	Heunggongvirae	Uroviricota	Caudoviricetes	Caudovirales	Schitoviridae	Gamaleyavirus	preVC_8	Clustered	VC_8_0	27	0.7083	1	7.98326	0.7083	0.7094	1	1	1	1	1	14
Escherichia~phage~EC121	Heunggongvirae	Uroviricota	Caudoviricetes	Caudovirales	Myoviridae	Tequatrovirus	preVC_56	Clustered/Singleton	VC_56_59	1	0	0	0	0	1	1	1	1	1	1	1
Escherichia~phage~EC6	Heunggongvirae	Uroviricota	Caudoviricetes	Caudovirales	Myoviridae	Felixounavirus	preVC_37	Clustered	VC_37_0	25	0.8878	1	5.64039	0.8878	0.9933	1	1	1	1	1	3
Escherichia~phage~ECA2	Heunggongvirae	Uroviricota	Caudoviricetes	Caudovirales	Autographiviridae	Teetrevirus	preVC_328	Clustered	VC_328_0	64	0.8177	1	6.73071	0.8177	0.999	1	1	1	1	1	11
Escherichia~phage~ECBP1	Heunggongvirae	Uroviricota	Caudoviricetes	Caudovirales	Schitoviridae	Gamaleyavirus	preVC_8	Clustered	VC_8_0	27	0.7083	1	7.98326	0.7083	0.7094	1	1	1	1	1	14
Escherichia~phage~ECBP2	Heunggongvirae	Uroviricota	Caudoviricetes	Caudovirales	Podoviridae	Kuravirus	preVC_108	Clustered	VC_108_0	6	0.6707	1	6.20173	0.6707	1	1	1	1	1	1	1
Escherichia~phage~ECBP5	Heunggongvirae	Uroviricota	Caudoviricetes	Caudovirales	Autographiviridae	Gajwadongvirus		Overlap (VC_339/VC_340/VC_341)
Escherichia~phage~ECD7	Heunggongvirae	Uroviricota	Caudoviricetes	Caudovirales	Myoviridae	Krischvirus	preVC_58	Clustered	VC_58_0	6	0.1846	1	5.59762	0.1846	1	1	1	1	1	1	1
Escherichia~phage~ECML-117	Heunggongvirae	Uroviricota	Caudoviricetes	Caudovirales	Myoviridae	Wifcevirus		Overlap (VC_295/VC_296)
Escherichia~phage~ECML-134	Heunggongvirae	Uroviricota	Caudoviricetes	Caudovirales	Myoviridae	Tequatrovirus	preVC_56	Clustered/Singleton	VC_56_11	1	0	0	0	0	1	1	1	1	1	1	1
Escherichia~phage~ECML-4	Heunggongvirae	Uroviricota	Caudoviricetes	Caudovirales	Ackermannviridae	Kuttervirus	preVC_50	Clustered	VC_50_1	40	0.4864	1	7.03745	0.4864	1	1	1	1	1	1	1
Escherichia~phage~ECO4	Heunggongvirae	Uroviricota	Caudoviricetes	Caudovirales	Myoviridae	Tequatrovirus	preVC_56	Clustered/Singleton	VC_56_46	1	0	0	0	0	1	1	1	1	1	1	1
Escherichia~phage~ECP1	Heunggongvirae	Uroviricota	Caudoviricetes	Caudovirales	Siphoviridae	Wongtaivirus	preVC_262	Clustered	VC_262_0	16	0.4391	1	7.30155	0.4391	0.8833	1	1	1	1	1	10
Escherichia~phage~EG1	Heunggongvirae	Uroviricota	Caudoviricetes	Caudovirales	Autographiviridae	Teseptimavirus	preVC_328	Clustered	VC_328_0	64	0.8177	1	6.73071	0.8177	0.999	1	1	1	1	1	11
Escherichia~phage~EK99P-1	Heunggongvirae	Uroviricota	Caudoviricetes	Caudovirales	Siphoviridae	Dhillonvirus	preVC_364	Clustered	VC_364_0	10	0.7225	1	3.99895	0.7225	1	1	1	1	1	1	1
Escherichia~phage~EP75	Heunggongvirae	Uroviricota	Caudoviricetes	Caudovirales	Ackermannviridae	Kuttervirus	preVC_50	Clustered	VC_50_1	40	0.4864	1	7.03745	0.4864	1	1	1	1	1	1	1
Escherichia~phage~ESCO13	Heunggongvirae	Uroviricota	Caudoviricetes	Caudovirales	Myoviridae	Phapecoctavirus	preVC_106	Clustered	VC_106_1	12	0.4618	1	6.59792	0.4618	1	1	1	1	1	1	1
Escherichia~phage~ESCO5	Heunggongvirae	Uroviricota	Caudoviricetes	Caudovirales	Myoviridae	Phapecoctavirus	preVC_106	Clustered	VC_106_1	12	0.4618	1	6.59792	0.4618	1	1	1	1	1	1	1
Escherichia~phage~ESSI2_ev015	Heunggongvirae	Uroviricota	Caudoviricetes	Caudovirales	Myoviridae	Seongnamvirus	preVC_125	Clustered	VC_125_0	20	0.9706	1	5.56846	0.9706	1	1	1	1	1	1	12
Escherichia~phage~ESSI2_ev040	Heunggongvirae	Uroviricota	Caudoviricetes	Caudovirales	Myoviridae	Seongnamvirus	preVC_125	Clustered	VC_125_0	20	0.9706	1	5.56846	0.9706	1	1	1	1	1	1	12
Escherichia~phage~ESSI2_ev129	Heunggongvirae	Uroviricota	Caudoviricetes	Caudovirales	Myoviridae	Seongnamvirus	preVC_125	Clustered	VC_125_0	20	0.9706	1	5.56846	0.9706	1	1	1	1	1	1	12
Escherichia~phage~ESSI2_ev239	Heunggongvirae	Uroviricota	Caudoviricetes	Caudovirales	Myoviridae	Seongnamvirus	preVC_125	Clustered	VC_125_0	20	0.9706	1	5.56846	0.9706	1	1	1	1	1	1	12
Escherichia~phage~Ebrios	Heunggongvirae	Uroviricota	Caudoviricetes	Caudovirales	Autographiviridae	Teseptimavirus	preVC_328	Clustered	VC_328_0	64	0.8177	1	6.73071	0.8177	0.999	1	1	1	1	1	11
Escherichia~phage~EcNP1	Heunggongvirae	Uroviricota	Caudoviricetes	Caudovirales	Myoviridae	Tequatrovirus	preVC_56	Clustered/Singleton	VC_56_62	1	0	0	0	0	1	1	1	1	1	1	1
Escherichia~phage~EcS1	Heunggongvirae	Uroviricota	Caudoviricetes	Caudovirales	Myoviridae	Winklervirus		Overlap (VC_56/VC_60)
Escherichia~phage~EcoDS1	Heunggongvirae	Uroviricota	Caudoviricetes	Caudovirales	Autographiviridae	Kayfunavirus	preVC_327	Clustered	VC_327_0	20	0.7348	1	4.47304	0.7348	1	1	1	1	1	1	1
Escherichia~phage~Eco_BIFF	Heunggongvirae	Uroviricota	Caudoviricetes	Caudovirales	Drexlerviridae	Tunavirus	preVC_324	Clustered	VC_324_0	18	0.5327	1	4.9396	0.5327	1	1	1	1	1	1	3
Escherichia~phage~Envy	Heunggongvirae	Uroviricota	Caudoviricetes	Caudovirales	Siphoviridae	Dhillonvirus	preVC_364	Clustered	VC_364_0	10	0.7225	1	3.99895	0.7225	1	1	1	1	1	1	1
Escherichia~phage~Eps7	Heunggongvirae	Uroviricota	Caudoviricetes	Caudovirales	Demerecviridae	Epseptimavirus	preVC_113	Clustered	VC_113_0	33	0.6222	1	7.33185	0.6222	0.9886	1	1	1	1	1	1
Escherichia~phage~F2	Heunggongvirae	Uroviricota	Caudoviricetes	Caudovirales	Myoviridae	Tequatrovirus	preVC_57	Clustered	VC_57_0	17	0.1836	1	6.97356	0.1836	0.9485	1	1	1	1	1	2
Escherichia~phage~FEC14	Heunggongvirae	Uroviricota	Caudoviricetes	Caudovirales	Ackermannviridae	Kuttervirus	preVC_50	Clustered	VC_50_1	40	0.4864	1	7.03745	0.4864	1	1	1	1	1	1	1
Escherichia~phage~FEC19	Heunggongvirae	Uroviricota	Caudoviricetes	Caudovirales	Myoviridae	Wifcevirus		Overlap (VC_295/VC_296)
Escherichia~phage~FFH2	Heunggongvirae	Uroviricota	Caudoviricetes	Caudovirales	Myoviridae	Vequintavirus		Overlap (VC_103/VC_104)
Escherichia~phage~FV3	Heunggongvirae	Uroviricota	Caudoviricetes	Caudovirales	Myoviridae	Vequintavirus		Overlap (VC_103/VC_104)
Escherichia~phage~GA2A	Heunggongvirae	Uroviricota	Caudoviricetes	Caudovirales	Autographiviridae	Kayfunavirus	preVC_327	Clustered	VC_327_0	20	0.7348	1	4.47304	0.7348	1	1	1	1	1	1	1
Escherichia~phage~Gluttony	Heunggongvirae	Uroviricota	Caudoviricetes	Caudovirales	Siphoviridae	Dhillonvirus	preVC_364	Clustered	VC_364_0	10	0.7225	1	3.99895	0.7225	1	1	1	1	1	1	1
Escherichia~phage~Gostya9	Heunggongvirae	Uroviricota	Caudoviricetes	Caudovirales	Demerecviridae	Tequintavirus	preVC_112	Clustered	VC_112_0	31	0.5988	1	7.58245	0.5988	0.9742	1	1	1	1	1	1
Escherichia~phage~H8	Heunggongvirae	Uroviricota	Caudoviricetes	Caudovirales	Demerecviridae	Tequintavirus	preVC_112	Clustered/Singleton	VC_112_2	1	0	0	0	0	1	1	1	1	1	1	1
Escherichia~phage~HK022	Heunggongvirae	Uroviricota	Caudoviricetes	Caudovirales	Siphoviridae	Shamshuipovirus	preVC_262	Clustered	VC_262_0	16	0.4391	1	7.30155	0.4391	0.8833	1	1	1	1	1	10
Escherichia~phage~HK106	Heunggongvirae	Uroviricota	Caudoviricetes	Caudovirales	Siphoviridae	Wanchaivirus	preVC_262	Clustered	VC_262_0	16	0.4391	1	7.30155	0.4391	0.8833	1	1	1	1	1	10
Escherichia~phage~HK446	Heunggongvirae	Uroviricota	Caudoviricetes	Caudovirales	Siphoviridae	Kwaitsingvirus	preVC_262	Clustered	VC_262_0	16	0.4391	1	7.30155	0.4391	0.8833	1	1	1	1	1	10
Escherichia~phage~HK542	Heunggongvirae	Uroviricota	Caudoviricetes	Caudovirales	Siphoviridae	Wongtaivirus	preVC_262	Clustered	VC_262_0	16	0.4391	1	7.30155	0.4391	0.8833	1	1	1	1	1	10
Escherichia~phage~HK544	Heunggongvirae	Uroviricota	Caudoviricetes	Caudovirales	Siphoviridae	Kwaitsingvirus	preVC_262	Clustered	VC_262_0	16	0.4391	1	7.30155	0.4391	0.8833	1	1	1	1	1	10
Escherichia~phage~HK578	Heunggongvirae	Uroviricota	Caudoviricetes	Caudovirales	Siphoviridae	Dhillonvirus	preVC_364	Clustered	VC_364_0	10	0.7225	1	3.99895	0.7225	1	1	1	1	1	1	1
Escherichia~phage~HK629	Heunggongvirae	Uroviricota	Caudoviricetes	Caudovirales	Siphoviridae	Lambdavirus		Overlap (VC_303/VC_364)
Escherichia~phage~HK630	Heunggongvirae	Uroviricota	Caudoviricetes	Caudovirales	Siphoviridae	Lambdavirus		Overlap (VC_303/VC_364)
Escherichia~phage~HK633	Heunggongvirae	Uroviricota	Caudoviricetes	Caudovirales	Siphoviridae	Saikungvirus	preVC_262	Clustered	VC_262_0	16	0.4391	1	7.30155	0.4391	0.8833	1	1	1	1	1	10
Escherichia~phage~HK639	Heunggongvirae	Uroviricota	Caudoviricetes	Caudovirales	Siphoviridae	Unassigned		Outlier
Escherichia~phage~HK75	Heunggongvirae	Uroviricota	Caudoviricetes	Caudovirales	Siphoviridae	Saikungvirus	preVC_262	Clustered	VC_262_0	16	0.4391	1	7.30155	0.4391	0.8833	1	1	1	1	1	10
Escherichia~phage~HK97	Heunggongvirae	Uroviricota	Caudoviricetes	Caudovirales	Siphoviridae	Byrnievirus	preVC_262	Clustered	VC_262_0	16	0.4391	1	7.30155	0.4391	0.8833	1	1	1	1	1	10
Escherichia~phage~HP3	Heunggongvirae	Uroviricota	Caudoviricetes	Caudovirales	Myoviridae	Tequatrovirus	preVC_56	Clustered	VC_56_37	2	0.0055	0.635273	8.7178	0.0035	1	1	1	1	1	1	1
Escherichia~phage~HX01	Heunggongvirae	Uroviricota	Caudoviricetes	Caudovirales	Myoviridae	Mosigvirus		Outlier
Escherichia~phage~HY01	Heunggongvirae	Uroviricota	Caudoviricetes	Caudovirales	Myoviridae	Tequatrovirus	preVC_56	Clustered/Singleton	VC_56_64	1	0	0	0	0	1	1	1	1	1	1	1
Escherichia~phage~HY02	Heunggongvirae	Uroviricota	Caudoviricetes	Caudovirales	Myoviridae	Felixounavirus	preVC_37	Clustered	VC_37_0	25	0.8878	1	5.64039	0.8878	0.9933	1	1	1	1	1	3
Escherichia~phage~HY03	Heunggongvirae	Uroviricota	Caudoviricetes	Caudovirales	Myoviridae	Tequatrovirus	preVC_56	Clustered/Singleton	VC_56_73	1	0	0	0	0	1	1	1	1	1	1	1
Escherichia~phage~HZ2R8	Heunggongvirae	Uroviricota	Caudoviricetes	Caudovirales	Autographiviridae	Teseptimavirus	preVC_328	Clustered	VC_328_0	64	0.8177	1	6.73071	0.8177	0.999	1	1	1	1	1	11
Escherichia~phage~HZP2	Heunggongvirae	Uroviricota	Caudoviricetes	Caudovirales	Autographiviridae	Teseptimavirus	preVC_328	Clustered	VC_328_0	64	0.8177	1	6.73071	0.8177	0.999	1	1	1	1	1	11
Escherichia~phage~Henu7	Heunggongvirae	Uroviricota	Caudoviricetes	Caudovirales	Drexlerviridae	Henuseptimavirus	preVC_323	Clustered	VC_323_1	30	0.5951	1	6.23028	0.5951	1	1	1	1	1	1	5
Escherichia~phage~Henu8	Heunggongvirae	Uroviricota	Caudoviricetes	Caudovirales	Drexlerviridae	Hanrivervirus	preVC_323	Clustered	VC_323_1	30	0.5951	1	6.23028	0.5951	1	1	1	1	1	1	5
Escherichia~phage~IME08	Heunggongvirae	Uroviricota	Caudoviricetes	Caudovirales	Myoviridae	Dhakavirus	preVC_59	Clustered	VC_59_1	10	0.0984	1	7.81971	0.0984	0.9333	1	1	1	1	1	1
Escherichia~phage~IME11	Heunggongvirae	Uroviricota	Caudoviricetes	Caudovirales	Schitoviridae	Gamaleyavirus	preVC_8	Clustered	VC_8_0	27	0.7083	1	7.98326	0.7083	0.7094	1	1	1	1	1	14
Escherichia~phage~IMM-002	Heunggongvirae	Uroviricota	Caudoviricetes	Caudovirales	Autographiviridae	Kayfunavirus	preVC_327	Clustered	VC_327_0	20	0.7348	1	4.47304	0.7348	1	1	1	1	1	1	1
Escherichia~phage~J8-65	Heunggongvirae	Uroviricota	Caudoviricetes	Caudovirales	Autographiviridae	Bonnellvirus	preVC_96	Clustered	VC_96_0	3	0.2024	0.996901	4.3778	0.2018	1	1	1	1	1	1	2
Escherichia~phage~JES2013	Heunggongvirae	Uroviricota	Caudoviricetes	Caudovirales	Myoviridae	Vequintavirus		Overlap (VC_103/VC_104)
Escherichia~phage~JH2	Heunggongvirae	Uroviricota	Caudoviricetes	Caudovirales	Myoviridae	Felixounavirus	preVC_37	Clustered	VC_37_0	25	0.8878	1	5.64039	0.8878	0.9933	1	1	1	1	1	3
Escherichia~phage~JLK-2012	Heunggongvirae	Uroviricota	Caudoviricetes	Caudovirales	Siphoviridae	Marienburgvirus	preVC_302	Clustered	VC_302_0	7	0.1691	1	6.54734	0.1691	1	1	1	1	1	1	2
Escherichia~phage~JMPW1	Heunggongvirae	Uroviricota	Caudoviricetes	Caudovirales	Drexlerviridae	Tunavirus	preVC_324	Clustered	VC_324_0	18	0.5327	1	4.9396	0.5327	1	1	1	1	1	1	3
Escherichia~phage~JMPW2	Heunggongvirae	Uroviricota	Caudoviricetes	Caudovirales	Drexlerviridae	Tunavirus	preVC_324	Clustered	VC_324_0	18	0.5327	1	4.9396	0.5327	1	1	1	1	1	1	3
Escherichia~phage~JS10	Heunggongvirae	Uroviricota	Caudoviricetes	Caudovirales	Myoviridae	Dhakavirus	preVC_59	Clustered	VC_59_1	10	0.0984	1	7.81971	0.0984	0.9333	1	1	1	1	1	1
Escherichia~phage~JS98	Heunggongvirae	Uroviricota	Caudoviricetes	Caudovirales	Myoviridae	Dhakavirus	preVC_59	Clustered	VC_59_1	10	0.0984	1	7.81971	0.0984	0.9333	1	1	1	1	1	1
Escherichia~phage~JSE	Heunggongvirae	Uroviricota	Caudoviricetes	Caudovirales	Myoviridae	Krischvirus	preVC_58	Clustered	VC_58_0	6	0.1846	1	5.59762	0.1846	1	1	1	1	1	1	1
Escherichia~phage~Jk06	Heunggongvirae	Uroviricota	Caudoviricetes	Caudovirales	Drexlerviridae	Rogunavirus	preVC_325	Clustered	VC_325_0	19	0.6449	1	5.56753	0.6449	1	1	1	1	1	1	9
Escherichia~phage~K1F	Heunggongvirae	Uroviricota	Caudoviricetes	Caudovirales	Autographiviridae	Kayfunavirus	preVC_327	Clustered	VC_327_0	20	0.7348	1	4.47304	0.7348	1	1	1	1	1	1	1
Escherichia~phage~K1G	Heunggongvirae	Uroviricota	Caudoviricetes	Caudovirales	Siphoviridae	Kagunavirus	preVC_397	Clustered	VC_397_0	24	0.8702	1	5.52978	0.8702	1	1	1	1	1	1	3
Escherichia~phage~K1H	Heunggongvirae	Uroviricota	Caudoviricetes	Caudovirales	Siphoviridae	Kagunavirus	preVC_397	Clustered	VC_397_0	24	0.8702	1	5.52978	0.8702	1	1	1	1	1	1	3
Escherichia~phage~K1ind1	Heunggongvirae	Uroviricota	Caudoviricetes	Caudovirales	Siphoviridae	Kagunavirus	preVC_397	Clustered	VC_397_0	24	0.8702	1	5.52978	0.8702	1	1	1	1	1	1	3
Escherichia~phage~K1ind2	Heunggongvirae	Uroviricota	Caudoviricetes	Caudovirales	Siphoviridae	Kagunavirus	preVC_397	Clustered	VC_397_0	24	0.8702	1	5.52978	0.8702	1	1	1	1	1	1	3
Escherichia~phage~K30	Heunggongvirae	Uroviricota	Caudoviricetes	Caudovirales	Autographiviridae	Przondovirus	preVC_336	Clustered	VC_336_0	23	0.726	1	4.14116	0.726	1	1	1	1	1	1	1
Escherichia~phage~KBNP1711	Heunggongvirae	Uroviricota	Caudoviricetes	Caudovirales	Podoviridae	Kuravirus	preVC_108	Clustered	VC_108_0	6	0.6707	1	6.20173	0.6707	1	1	1	1	1	1	1
Escherichia~phage~KIT03	Heunggongvirae	Uroviricota	Caudoviricetes	Caudovirales	Myoviridae	Tequatrovirus	preVC_56	Clustered/Singleton	VC_56_52	1	0	0	0	0	1	1	1	1	1	1	1
Escherichia~phage~LL11	Heunggongvirae	Uroviricota	Caudoviricetes	Caudovirales	Autographiviridae	Vectrevirus	preVC_339	Clustered	VC_339_0	19	0.6167	1	4.80314	0.6167	1	1	1	1	1	1	5
Escherichia~phage~LL2	Heunggongvirae	Uroviricota	Caudoviricetes	Caudovirales	Autographiviridae	Teetrevirus	preVC_328	Clustered	VC_328_0	64	0.8177	1	6.73071	0.8177	0.999	1	1	1	1	1	11
Escherichia~phage~LL5	Heunggongvirae	Uroviricota	Caudoviricetes	Caudovirales	Drexlerviridae	Tlsvirus	preVC_323	Clustered	VC_323_0	11	0.2017	1	5.86342	0.2017	1	1	1	1	1	1	2
Escherichia~phage~LM33_P1	Heunggongvirae	Uroviricota	Caudoviricetes	Caudovirales	Autographiviridae	Kayfunavirus	preVC_327	Clustered	VC_327_0	20	0.7348	1	4.47304	0.7348	1	1	1	1	1	1	1
Escherichia~phage~Lambda_ev017	Heunggongvirae	Uroviricota	Caudoviricetes	Caudovirales	Siphoviridae	Lambdavirus		Overlap (VC_303/VC_364)
Escherichia~phage~Lambda_ev099	Heunggongvirae	Uroviricota	Caudoviricetes	Caudovirales	Siphoviridae	Lambdavirus		Overlap (VC_303/VC_364)
Escherichia~phage~Lambda_ev207	Heunggongvirae	Uroviricota	Caudoviricetes	Caudovirales	Siphoviridae	Lambdavirus		Overlap (VC_303/VC_364)
Escherichia~phage~Lambda_ev243	Heunggongvirae	Uroviricota	Caudoviricetes	Caudovirales	Siphoviridae	Lambdavirus		Overlap (VC_303/VC_364)
Escherichia~phage~Lidtsur	Heunggongvirae	Uroviricota	Caudoviricetes	Caudovirales	Autographiviridae	Bonnellvirus	preVC_96	Clustered	VC_96_0	3	0.2024	0.996901	4.3778	0.2018	1	1	1	1	1	1	2
Escherichia~phage~Lw1	Heunggongvirae	Uroviricota	Caudoviricetes	Caudovirales	Myoviridae	Pseudotevenvirus	preVC_93	Clustered	VC_93_1	10	0.2816	1	6.92403	0.2816	1	1	1	1	1	1	1
Escherichia~phage~Lyz12581Vzw	Heunggongvirae	Uroviricota	Caudoviricetes	Caudovirales	Podoviridae	Oslovirus	preVC_361	Clustered	VC_361_1	23	0.614	1	7.6319	0.614	0.8814	1	1	1	1	1	3
Escherichia~phage~MLF4	Heunggongvirae	Uroviricota	Caudoviricetes	Caudovirales	Myoviridae	Tequatrovirus	preVC_56	Clustered/Singleton	VC_56_53	1	0	0	0	0	1	1	1	1	1	1	1
Escherichia~phage~MX01	Heunggongvirae	Uroviricota	Caudoviricetes	Caudovirales	Myoviridae	Dhakavirus	preVC_59	Clustered	VC_59_1	10	0.0984	1	7.81971	0.0984	0.9333	1	1	1	1	1	1
Escherichia~phage~Mangalitsa	Heunggongvirae	Uroviricota	Caudoviricetes	Caudovirales	Chaseviridae	Carltongylesvirus	preVC_118	Clustered	VC_118_0	12	0.8618	1	6.12113	0.8618	1	1	1	1	1	2	6
Escherichia~phage~Min27	Heunggongvirae	Uroviricota	Caudoviricetes	Caudovirales	Podoviridae	Traversvirus	preVC_361	Clustered	VC_361_1	23	0.614	1	7.6319	0.614	0.8814	1	1	1	1	1	3
Escherichia~phage~Minorna	Heunggongvirae	Uroviricota	Caudoviricetes	Caudovirales	Autographiviridae	Drulisvirus	preVC_390	Clustered	VC_390_0	21	0.7337	1	4.68128	0.7337	1	1	1	1	1	1	3
Escherichia~phage~Mt1B1_P17	Heunggongvirae	Uroviricota	Caudoviricetes	Caudovirales	Myoviridae	Phapecoctavirus	preVC_106	Clustered	VC_106_1	12	0.4618	1	6.59792	0.4618	1	1	1	1	1	1	1
Escherichia~phage~Mu	Heunggongvirae	Uroviricota	Caudoviricetes	Caudovirales	Myoviridae	Muvirus	preVC_300	Clustered	VC_300_0	3	0.7051	0.99338	1.60948	0.7004	1	1	1	1	1	1	1
Escherichia~phage~Murica	Heunggongvirae	Uroviricota	Caudoviricetes	Caudovirales	Myoviridae	Vequintavirus		Overlap (VC_103/VC_104)
Escherichia~phage~N15	Heunggongvirae	Uroviricota	Caudoviricetes	Caudovirales	Siphoviridae	Ravinvirus	preVC_289	Clustered	VC_289_0	4	0.1091	0.999966	7.17177	0.1091	1	1	1	1	1	1	1
Escherichia~phage~N30	Heunggongvirae	Uroviricota	Caudoviricetes	Caudovirales	Autographiviridae	Teseptimavirus	preVC_328	Clustered	VC_328_0	64	0.8177	1	6.73071	0.8177	0.999	1	1	1	1	1	11
Escherichia~phage~N4	Heunggongvirae	Uroviricota	Caudoviricetes	Caudovirales	Schitoviridae	Enquatrovirus	preVC_8	Clustered	VC_8_0	27	0.7083	1	7.98326	0.7083	0.7094	1	1	1	1	1	14
Escherichia~phage~NC-A	Heunggongvirae	Uroviricota	Caudoviricetes	Caudovirales	Autographiviridae	Teseptimavirus	preVC_328	Clustered	VC_328_0	64	0.8177	1	6.73071	0.8177	0.999	1	1	1	1	1	11
Escherichia~phage~NJ01	Heunggongvirae	Uroviricota	Caudoviricetes	Caudovirales	Podoviridae	Kuravirus	preVC_108	Clustered	VC_108_0	6	0.6707	1	6.20173	0.6707	1	1	1	1	1	1	1
Escherichia~phage~OSYSP	Heunggongvirae	Uroviricota	Caudoviricetes	Caudovirales	Demerecviridae	Tequintavirus	preVC_112	Clustered	VC_112_0	31	0.5988	1	7.58245	0.5988	0.9742	1	1	1	1	1	1
Escherichia~phage~P1	Heunggongvirae	Uroviricota	Caudoviricetes	Caudovirales	Myoviridae	Punavirus	preVC_404	Clustered	VC_404_0	6	0.9971	0.997549	7.44173	0.9946	0.8	1	1	1	1	1	1
Escherichia~phage~P13374	Heunggongvirae	Uroviricota	Caudoviricetes	Caudovirales	Podoviridae	Oslovirus	preVC_361	Clustered	VC_361_1	23	0.614	1	7.6319	0.614	0.8814	1	1	1	1	1	3
Escherichia~phage~P483	Heunggongvirae	Uroviricota	Caudoviricetes	Caudovirales	Autographiviridae	Berlinvirus	preVC_328	Clustered	VC_328_0	64	0.8177	1	6.73071	0.8177	0.999	1	1	1	1	1	11
Escherichia~phage~P694	Heunggongvirae	Uroviricota	Caudoviricetes	Caudovirales	Autographiviridae	Berlinvirus	preVC_328	Clustered	VC_328_0	64	0.8177	1	6.73071	0.8177	0.999	1	1	1	1	1	11
Escherichia~phage~PA2	Heunggongvirae	Uroviricota	Caudoviricetes	Caudovirales	Podoviridae	Oslovirus	preVC_361	Clustered	VC_361_1	23	0.614	1	7.6319	0.614	0.8814	1	1	1	1	1	3
Escherichia~phage~PA28	Heunggongvirae	Uroviricota	Caudoviricetes	Caudovirales	Podoviridae	Traversvirus	preVC_361	Clustered	VC_361_1	23	0.614	1	7.6319	0.614	0.8814	1	1	1	1	1	3
Escherichia~phage~PBECO4	Heunggongvirae	Uroviricota	Caudoviricetes	Caudovirales	Myoviridae	Asteriusvirus	preVC_128	Clustered	VC_128_4	2	0.0902	0.860422	4.79583	0.0776	1	1	1	1	1	1	1
Escherichia~phage~PE3-1	Heunggongvirae	Uroviricota	Caudoviricetes	Caudovirales	Autographiviridae	Kayfunavirus	preVC_327	Clustered	VC_327_0	20	0.7348	1	4.47304	0.7348	1	1	1	1	1	1	1
Escherichia~phage~PE37	Heunggongvirae	Uroviricota	Caudoviricetes	Caudovirales	Myoviridae	Tequatrovirus	preVC_56	Clustered/Singleton	VC_56_54	1	0	0	0	0	1	1	1	1	1	1	1
Escherichia~phage~PGN590	Heunggongvirae	Uroviricota	Caudoviricetes	Caudovirales	Drexlerviridae	Hanrivervirus	preVC_323	Clustered	VC_323_1	30	0.5951	1	6.23028	0.5951	1	1	1	1	1	1	5
Escherichia~phage~PGT2	Heunggongvirae	Uroviricota	Caudoviricetes	Caudovirales	Autographiviridae	Ermolevavirus	preVC_95	Clustered	VC_95_0	26	0.6453	1	6.40041	0.6453	1	1	1	1	1	1	16
Escherichia~phage~PP01	Heunggongvirae	Uroviricota	Caudoviricetes	Caudovirales	Myoviridae	Tequatrovirus	preVC_56	Clustered/Singleton	VC_56_74	1	0	0	0	0	1	1	1	1	1	1	1
Escherichia~phage~PTXU04	Heunggongvirae	Uroviricota	Caudoviricetes	Caudovirales	Podoviridae	Xuquatrovirus		Outlier
Escherichia~phage~PhaxI	Heunggongvirae	Uroviricota	Caudoviricetes	Caudovirales	Ackermannviridae	Kuttervirus	preVC_50	Clustered	VC_50_1	40	0.4864	1	7.03745	0.4864	1	1	1	1	1	1	1
Escherichia~phage~Phi1	Heunggongvirae	Uroviricota	Caudoviricetes	Caudovirales	Myoviridae	Krischvirus	preVC_58	Clustered	VC_58_0	6	0.1846	1	5.59762	0.1846	1	1	1	1	1	1	1
Escherichia~phage~Pollock	Heunggongvirae	Uroviricota	Caudoviricetes	Caudovirales	Schitoviridae	Pollockvirus	preVC_10	Clustered	VC_10_0	6	0.3161	1	5.44852	0.3161	1	1	1	1	1	1	3
Escherichia~phage~QL01	Heunggongvirae	Uroviricota	Caudoviricetes	Caudovirales	Myoviridae	Dhakavirus	preVC_59	Clustered	VC_59_1	10	0.0984	1	7.81971	0.0984	0.9333	1	1	1	1	1	1
Escherichia~phage~RB3	Heunggongvirae	Uroviricota	Caudoviricetes	Caudovirales	Myoviridae	Tequatrovirus	preVC_56	Clustered/Singleton	VC_56_44	1	0	0	0	0	1	1	1	1	1	1	1
Escherichia~phage~RB49	Heunggongvirae	Uroviricota	Caudoviricetes	Caudovirales	Myoviridae	Krischvirus	preVC_58	Clustered	VC_58_0	6	0.1846	1	5.59762	0.1846	1	1	1	1	1	1	1
Escherichia~phage~RB69	Heunggongvirae	Uroviricota	Caudoviricetes	Caudovirales	Myoviridae	Mosigvirus	preVC_57	Clustered	VC_57_0	17	0.1836	1	6.97356	0.1836	0.9485	1	1	1	1	1	2
Escherichia~phage~RCS47	Heunggongvirae	Uroviricota	Caudoviricetes	Caudovirales	Myoviridae	Punavirus	preVC_404	Clustered	VC_404_0	6	0.9971	0.997549	7.44173	0.9946	0.8	1	1	1	1	1	1
Escherichia~phage~Ro45lw	Heunggongvirae	Uroviricota	Caudoviricetes	Caudovirales	Autographiviridae	Kayfunavirus	preVC_327	Clustered	VC_327_0	20	0.7348	1	4.47304	0.7348	1	1	1	1	1	1	1
Escherichia~phage~SECphi27	Heunggongvirae	Uroviricota	Caudoviricetes	Caudovirales	Drexlerviridae	Warwickvirus	preVC_323	Clustered	VC_323_1	30	0.5951	1	6.23028	0.5951	1	1	1	1	1	1	5
Escherichia~phage~SF	Heunggongvirae	Uroviricota	Caudoviricetes	Caudovirales	Myoviridae	Mosigvirus	preVC_57	Clustered	VC_57_0	17	0.1836	1	6.97356	0.1836	0.9485	1	1	1	1	1	2
Escherichia~phage~SH2026Stx1	Heunggongvirae	Uroviricota	Caudoviricetes	Caudovirales	Podoviridae	Traversvirus	preVC_361	Clustered	VC_361_1	23	0.614	1	7.6319	0.614	0.8814	1	1	1	1	1	3
Escherichia~phage~SP15	Heunggongvirae	Uroviricota	Caudoviricetes	Caudovirales	Demerecviridae	Tequintavirus	preVC_112	Clustered	VC_112_0	31	0.5988	1	7.58245	0.5988	0.9742	1	1	1	1	1	1
Escherichia~phage~SRT7	Heunggongvirae	Uroviricota	Caudoviricetes	Caudovirales	Autographiviridae	Foetvirus	preVC_328	Clustered	VC_328_0	64	0.8177	1	6.73071	0.8177	0.999	1	1	1	1	1	11
Escherichia~phage~SRT8	Heunggongvirae	Uroviricota	Caudoviricetes	Caudovirales	Drexlerviridae	Sertoctavirus	preVC_324	Clustered	VC_324_0	18	0.5327	1	4.9396	0.5327	1	1	1	1	1	1	3
Escherichia~phage~ST0	Heunggongvirae	Uroviricota	Caudoviricetes	Caudovirales	Myoviridae	Mosigvirus	preVC_57	Clustered	VC_57_0	17	0.1836	1	6.97356	0.1836	0.9485	1	1	1	1	1	2
Escherichia~phage~ST31	Heunggongvirae	Uroviricota	Caudoviricetes	Caudovirales	Autographiviridae	Kayfunavirus	preVC_327	Clustered	VC_327_0	20	0.7348	1	4.47304	0.7348	1	1	1	1	1	1	1
Escherichia~phage~ST32	Heunggongvirae	Uroviricota	Caudoviricetes	Caudovirales	Chaseviridae	Carltongylesvirus	preVC_118	Clustered	VC_118_0	12	0.8618	1	6.12113	0.8618	1	1	1	1	1	2	6
Escherichia~phage~SUSP2	Heunggongvirae	Uroviricota	Caudoviricetes	Caudovirales	Myoviridae	Suspvirus	preVC_37	Clustered	VC_37_0	25	0.8878	1	5.64039	0.8878	0.9933	1	1	1	1	1	3
Escherichia~phage~Seurat	Heunggongvirae	Uroviricota	Caudoviricetes	Caudovirales	Siphoviridae	Seuratvirus	preVC_3	Clustered	VC_3_0	3	0.2364	0.996414	3.64755	0.2356	1	1	1	1	1	1	1
Escherichia~phage~Skarpretter	Heunggongvirae	Uroviricota	Caudoviricetes	Caudovirales	Podoviridae	Skarprettervirus	preVC_261	Clustered	VC_261_0	6	0.702	1	5.94932	0.702	1	1	1	1	1	2	4
Escherichia~phage~Sortsne	Heunggongvirae	Uroviricota	Caudoviricetes	Caudovirales	Podoviridae	Sortsnevirus	preVC_261	Clustered	VC_261_0	6	0.702	1	5.94932	0.702	1	1	1	1	1	2	4
Escherichia~phage~Stx2~II	Heunggongvirae	Uroviricota	Caudoviricetes	Caudovirales	Podoviridae	Traversvirus	preVC_361	Clustered	VC_361_0	2	0.0404	0.912278	2.44949	0.0369	1	1	1	1	1	1	1
Escherichia~phage~T1	Heunggongvirae	Uroviricota	Caudoviricetes	Caudovirales	Drexlerviridae	Tunavirus	preVC_324	Clustered	VC_324_0	18	0.5327	1	4.9396	0.5327	1	1	1	1	1	1	3
Escherichia~phage~T2	Heunggongvirae	Uroviricota	Caudoviricetes	Caudovirales	Myoviridae	Tequatrovirus	preVC_56	Clustered/Singleton	VC_56_66	1	0	0	0	0	1	1	1	1	1	1	1
Escherichia~phage~T5	Heunggongvirae	Uroviricota	Caudoviricetes	Caudovirales	Demerecviridae	Tequintavirus	preVC_112	Clustered	VC_112_0	31	0.5988	1	7.58245	0.5988	0.9742	1	1	1	1	1	1
Escherichia~phage~T7	Heunggongvirae	Uroviricota	Caudoviricetes	Caudovirales	Autographiviridae	Teseptimavirus	preVC_328	Clustered	VC_328_0	64	0.8177	1	6.73071	0.8177	0.999	1	1	1	1	1	11
Escherichia~phage~TL-2011b	Heunggongvirae	Uroviricota	Caudoviricetes	Caudovirales	Podoviridae	Unassigned	preVC_272	Clustered	VC_272_0	5	0.6958	0.999999	5.41367	0.6958	1	1	1	1	1	1	1
Escherichia~phage~TL-2011c	Heunggongvirae	Uroviricota	Caudoviricetes	Caudovirales	Podoviridae	Oslovirus	preVC_361	Clustered	VC_361_1	23	0.614	1	7.6319	0.614	0.8814	1	1	1	1	1	3
Escherichia~phage~Tls	Heunggongvirae	Uroviricota	Caudoviricetes	Caudovirales	Drexlerviridae	Tlsvirus	preVC_323	Clustered	VC_323_0	11	0.2017	1	5.86342	0.2017	1	1	1	1	1	1	2
Escherichia~phage~UAB_Phi78	Heunggongvirae	Uroviricota	Caudoviricetes	Caudovirales	Autographiviridae	Zindervirus	preVC_339	Clustered	VC_339_0	19	0.6167	1	4.80314	0.6167	1	1	1	1	1	1	5
Escherichia~phage~UFV-AREG1	Heunggongvirae	Uroviricota	Caudoviricetes	Caudovirales	Myoviridae	Tequatrovirus	preVC_56	Clustered/Singleton	VC_56_57	1	0	0	0	0	1	1	1	1	1	1	1
Escherichia~phage~Utah	Heunggongvirae	Uroviricota	Caudoviricetes	Caudovirales	Siphoviridae	Chivirus	preVC_33	Clustered	VC_33_0	38	0.7037	1	4.08522	0.7037	1	1	1	1	1	2	1
Escherichia~phage~V18	Heunggongvirae	Uroviricota	Caudoviricetes	Caudovirales	Myoviridae	Vequintavirus		Overlap (VC_103/VC_104)
Escherichia~phage~V5	Heunggongvirae	Uroviricota	Caudoviricetes	Caudovirales	Myoviridae	Vequintavirus		Overlap (VC_103/VC_104)
Escherichia~phage~VB_EcoS-Golestan	Heunggongvirae	Uroviricota	Caudoviricetes	Caudovirales	Siphoviridae	Kagunavirus	preVC_397	Clustered	VC_397_0	24	0.8702	1	5.52978	0.8702	1	1	1	1	1	1	3
Escherichia~phage~VEcB	Heunggongvirae	Uroviricota	Caudoviricetes	Caudovirales	Myoviridae	Unassigned	preVC_106	Clustered	VC_106_0	6	0.1659	0.999993	5.92869	0.1659	1	1	1	1	1	1	0
Escherichia~phage~WG01	Heunggongvirae	Uroviricota	Caudoviricetes	Caudovirales	Myoviridae	Dhakavirus	preVC_59	Clustered	VC_59_1	10	0.0984	1	7.81971	0.0984	0.9333	1	1	1	1	1	1
Escherichia~phage~Wphi	Heunggongvirae	Uroviricota	Caudoviricetes	Caudovirales	Myoviridae	Peduovirus	preVC_177	Clustered	VC_177_0	34	0.6033	1	5.21949	0.6033	1	1	1	1	1	1	6
Escherichia~phage~YD-2008.s	Heunggongvirae	Uroviricota	Caudoviricetes	Caudovirales	Siphoviridae	Dhillonvirus	preVC_364	Clustered	VC_364_0	10	0.7225	1	3.99895	0.7225	1	1	1	1	1	1	1
Escherichia~phage~YUEEL01	Heunggongvirae	Uroviricota	Caudoviricetes	Caudovirales	Myoviridae	Tequatrovirus	preVC_56	Clustered	VC_56_37	2	0.0055	0.635273	8.7178	0.0035	1	1	1	1	1	1	1
Escherichia~phage~YZ1	Heunggongvirae	Uroviricota	Caudoviricetes	Caudovirales	Autographiviridae	Kayfunavirus	preVC_327	Clustered	VC_327_0	20	0.7348	1	4.47304	0.7348	1	1	1	1	1	1	1
Escherichia~phage~ZG49	Heunggongvirae	Uroviricota	Caudoviricetes	Caudovirales	Autographiviridae	Kayfunavirus	preVC_327	Clustered	VC_327_0	20	0.7348	1	4.47304	0.7348	1	1	1	1	1	1	1
Escherichia~phage~aalborv	Heunggongvirae	Uroviricota	Caudoviricetes	Caudovirales	Drexlerviridae	Hanrivervirus	preVC_323	Clustered	VC_323_1	30	0.5951	1	6.23028	0.5951	1	1	1	1	1	1	5
Escherichia~phage~aaroes	Heunggongvirae	Uroviricota	Caudoviricetes	Caudovirales	Drexlerviridae	Hanrivervirus	preVC_323	Clustered	VC_323_1	30	0.5951	1	6.23028	0.5951	1	1	1	1	1	1	5
Escherichia~phage~alia	Heunggongvirae	Uroviricota	Caudoviricetes	Caudovirales	Myoviridae	Unassigned	preVC_106	Clustered	VC_106_0	6	0.1659	0.999993	5.92869	0.1659	1	1	1	1	1	1	0
Escherichia~phage~anhysbys	Heunggongvirae	Uroviricota	Caudoviricetes	Caudovirales	Myoviridae	Phapecoctavirus	preVC_106	Clustered	VC_106_1	12	0.4618	1	6.59792	0.4618	1	1	1	1	1	1	1
Escherichia~phage~atuna	Heunggongvirae	Uroviricota	Caudoviricetes	Caudovirales	Drexlerviridae	Warwickvirus	preVC_323	Clustered	VC_323_1	30	0.5951	1	6.23028	0.5951	1	1	1	1	1	1	5
Escherichia~phage~chee24	Heunggongvirae	Uroviricota	Caudoviricetes	Caudovirales	Demerecviridae	Tequintavirus	preVC_112	Clustered	VC_112_0	31	0.5988	1	7.58245	0.5988	0.9742	1	1	1	1	1	1
Escherichia~phage~damhaus	Heunggongvirae	Uroviricota	Caudoviricetes	Caudovirales	Drexlerviridae	Hanrivervirus	preVC_323	Clustered	VC_323_1	30	0.5951	1	6.23028	0.5951	1	1	1	1	1	1	5
Escherichia~phage~e4/1c	Heunggongvirae	Uroviricota	Caudoviricetes	Caudovirales	Drexlerviridae	Rogunavirus	preVC_325	Clustered	VC_325_0	19	0.6449	1	5.56753	0.6449	1	1	1	1	1	1	9
Escherichia~phage~egaa	Heunggongvirae	Uroviricota	Caudoviricetes	Caudovirales	Drexlerviridae	Hanrivervirus	preVC_323	Clustered	VC_323_1	30	0.5951	1	6.23028	0.5951	1	1	1	1	1	1	5
Escherichia~phage~flopper	Heunggongvirae	Uroviricota	Caudoviricetes	Caudovirales	Chaseviridae	Carltongylesvirus	preVC_118	Clustered	VC_118_0	12	0.8618	1	6.12113	0.8618	1	1	1	1	1	2	6
Escherichia~phage~fp01	Heunggongvirae	Uroviricota	Caudoviricetes	Caudovirales	Demerecviridae	Tequintavirus	preVC_112	Clustered	VC_112_0	31	0.5988	1	7.58245	0.5988	0.9742	1	1	1	1	1	1
Escherichia~phage~grams	Heunggongvirae	Uroviricota	Caudoviricetes	Caudovirales	Drexlerviridae	Hanrivervirus	preVC_323	Clustered	VC_323_1	30	0.5951	1	6.23028	0.5951	1	1	1	1	1	1	5
Escherichia~phage~haarsle	Heunggongvirae	Uroviricota	Caudoviricetes	Caudovirales	Drexlerviridae	Hanrivervirus	preVC_323	Clustered	VC_323_1	30	0.5951	1	6.23028	0.5951	1	1	1	1	1	1	5
Escherichia~phage~herni	Heunggongvirae	Uroviricota	Caudoviricetes	Caudovirales	Drexlerviridae	Hanrivervirus	preVC_323	Clustered	VC_323_1	30	0.5951	1	6.23028	0.5951	1	1	1	1	1	1	5
Escherichia~phage~ime09	Heunggongvirae	Uroviricota	Caudoviricetes	Caudovirales	Myoviridae	Tequatrovirus	preVC_56	Clustered/Singleton	VC_56_5	1	0	0	0	0	1	1	1	1	1	1	1
Escherichia~phage~mEp234	Heunggongvirae	Uroviricota	Caudoviricetes	Caudovirales	Siphoviridae	Wanchaivirus	preVC_262	Clustered	VC_262_0	16	0.4391	1	7.30155	0.4391	0.8833	1	1	1	1	1	10
Escherichia~phage~mEpX1	Heunggongvirae	Uroviricota	Caudoviricetes	Caudovirales	Siphoviridae	Cuauhtlivirus	preVC_262	Clustered	VC_262_0	16	0.4391	1	7.30155	0.4391	0.8833	1	1	1	1	1	10
Escherichia~phage~mEpX2	Heunggongvirae	Uroviricota	Caudoviricetes	Caudovirales	Siphoviridae	Shamshuipovirus	preVC_262	Clustered	VC_262_0	16	0.4391	1	7.30155	0.4391	0.8833	1	1	1	1	1	10
Escherichia~phage~muut	Heunggongvirae	Uroviricota	Caudoviricetes	Caudovirales	Myoviridae	Unassigned	preVC_106	Clustered	VC_106_0	6	0.1659	0.999993	5.92869	0.1659	1	1	1	1	1	1	0
Escherichia~phage~nepoznato	Heunggongvirae	Uroviricota	Caudoviricetes	Caudovirales	Myoviridae	Phapecoctavirus	preVC_106	Clustered	VC_106_1	12	0.4618	1	6.59792	0.4618	1	1	1	1	1	1	1
Escherichia~phage~nieznany	Heunggongvirae	Uroviricota	Caudoviricetes	Caudovirales	Myoviridae	Phapecoctavirus	preVC_106	Clustered	VC_106_1	12	0.4618	1	6.59792	0.4618	1	1	1	1	1	1	1
Escherichia~phage~p000v	Heunggongvirae	Uroviricota	Caudoviricetes	Caudovirales	Myoviridae	Mosigvirus	preVC_57	Clustered	VC_57_0	17	0.1836	1	6.97356	0.1836	0.9485	1	1	1	1	1	2
Escherichia~phage~phAPEC8	Heunggongvirae	Uroviricota	Caudoviricetes	Caudovirales	Myoviridae	Phapecoctavirus	preVC_106	Clustered	VC_106_1	12	0.4618	1	6.59792	0.4618	1	1	1	1	1	1	1
Escherichia~phage~phT4A	Heunggongvirae	Uroviricota	Caudoviricetes	Caudovirales	Myoviridae	Slopekvirus	preVC_93	Clustered	VC_93_0	7	0.1721	1	5.65252	0.1721	1	1	1	1	1	1	1
Escherichia~phage~phi191	Heunggongvirae	Uroviricota	Caudoviricetes	Caudovirales	Podoviridae	Oslovirus	preVC_361	Clustered	VC_361_1	23	0.614	1	7.6319	0.614	0.8814	1	1	1	1	1	3
Escherichia~phage~phiAPCEc03	Heunggongvirae	Uroviricota	Caudoviricetes	Caudovirales	Demerecviridae	Tequintavirus	preVC_112	Clustered	VC_112_0	31	0.5988	1	7.58245	0.5988	0.9742	1	1	1	1	1	1
Escherichia~phage~phiC120	Heunggongvirae	Uroviricota	Caudoviricetes	Caudovirales	Myoviridae	Mosigvirus	preVC_57	Clustered	VC_57_0	17	0.1836	1	6.97356	0.1836	0.9485	1	1	1	1	1	2
Escherichia~phage~phiE142	Heunggongvirae	Uroviricota	Caudoviricetes	Caudovirales	Myoviridae	Mosigvirus	preVC_57	Clustered/Singleton	VC_57_1	1	0	0	0	0	1	1	1	1	1	1	1
Escherichia~phage~phiEB49	Heunggongvirae	Uroviricota	Caudoviricetes	Caudovirales	Drexlerviridae	Lindendrivevirus	preVC_325	Clustered	VC_325_0	19	0.6449	1	5.56753	0.6449	1	1	1	1	1	1	9
Escherichia~phage~phiEC1	Heunggongvirae	Uroviricota	Caudoviricetes	Caudovirales	Myoviridae	Mosigvirus	preVC_57	Clustered	VC_57_0	17	0.1836	1	6.97356	0.1836	0.9485	1	1	1	1	1	2
Escherichia~phage~phiEco32	Heunggongvirae	Uroviricota	Caudoviricetes	Caudovirales	Podoviridae	Kuravirus	preVC_108	Clustered	VC_108_0	6	0.6707	1	6.20173	0.6707	1	1	1	1	1	1	1
Escherichia~phage~phiEcoM-GJ1	Heunggongvirae	Uroviricota	Caudoviricetes	Caudovirales	Chaseviridae	Carltongylesvirus	preVC_118	Clustered	VC_118_0	12	0.8618	1	6.12113	0.8618	1	1	1	1	1	2	6
Escherichia~phage~phiKP26	Heunggongvirae	Uroviricota	Caudoviricetes	Caudovirales	Drexlerviridae	Rogunavirus	preVC_325	Clustered	VC_325_0	19	0.6449	1	5.56753	0.6449	1	1	1	1	1	1	9
Escherichia~phage~phiKT	Heunggongvirae	Uroviricota	Caudoviricetes	Caudovirales	Autographiviridae	Ermolevavirus	preVC_95	Clustered	VC_95_0	26	0.6453	1	6.40041	0.6453	1	1	1	1	1	1	16
Escherichia~phage~phiLLS	Heunggongvirae	Uroviricota	Caudoviricetes	Caudovirales	Demerecviridae	Tequintavirus	preVC_112	Clustered	VC_112_0	31	0.5988	1	7.58245	0.5988	0.9742	1	1	1	1	1	1
Escherichia~phage~phiSUSP1	Heunggongvirae	Uroviricota	Caudoviricetes	Caudovirales	Myoviridae	Suspvirus	preVC_37	Clustered	VC_37_0	25	0.8878	1	5.64039	0.8878	0.9933	1	1	1	1	1	3
Escherichia~phage~phiV10	Heunggongvirae	Uroviricota	Caudoviricetes	Caudovirales	Podoviridae	Uetakevirus	preVC_272	Clustered	VC_272_0	5	0.6958	0.999999	5.41367	0.6958	1	1	1	1	1	1	1
Escherichia~phage~pro147	Heunggongvirae	Uroviricota	Caudoviricetes	Caudovirales	Myoviridae	Peduovirus	preVC_177	Clustered	VC_177_0	34	0.6033	1	5.21949	0.6033	1	1	1	1	1	1	6
Escherichia~phage~pro483	Heunggongvirae	Uroviricota	Caudoviricetes	Caudovirales	Myoviridae	Peduovirus	preVC_177	Clustered	VC_177_0	34	0.6033	1	5.21949	0.6033	1	1	1	1	1	1	6
Escherichia~phage~saus132	Heunggongvirae	Uroviricota	Caudoviricetes	Caudovirales	Demerecviridae	Epseptimavirus	preVC_113	Clustered	VC_113_0	33	0.6222	1	7.33185	0.6222	0.9886	1	1	1	1	1	1
Escherichia~phage~slur01	Heunggongvirae	Uroviricota	Caudoviricetes	Caudovirales	Siphoviridae	Seuratvirus	preVC_3	Clustered	VC_3_0	3	0.2364	0.996414	3.64755	0.2356	1	1	1	1	1	1	1
Escherichia~phage~slur02	Heunggongvirae	Uroviricota	Caudoviricetes	Caudovirales	Straboviridae	Tequatrovirus	preVC_56	Clustered	VC_56_10	2	0.0054	0.63404	0	0.0034	1	1	1	1	1	1	1
Escherichia~phage~slur03	Heunggongvirae	Uroviricota	Caudoviricetes	Caudovirales	Myoviridae	Tequatrovirus	preVC_56	Clustered	VC_56_1	2	0.0054	0.636502	2	0.0034	1	1	1	1	1	1	1
Escherichia~phage~slur04	Heunggongvirae	Uroviricota	Caudoviricetes	Caudovirales	Straboviridae	Tequatrovirus	preVC_56	Clustered	VC_56_10	2	0.0054	0.63404	0	0.0034	1	1	1	1	1	1	1
Escherichia~phage~slur05	Heunggongvirae	Uroviricota	Caudoviricetes	Caudovirales	Siphoviridae	Dhillonvirus	preVC_364	Clustered	VC_364_0	10	0.7225	1	3.99895	0.7225	1	1	1	1	1	1	1
Escherichia~phage~slur07	Heunggongvirae	Uroviricota	Caudoviricetes	Caudovirales	Myoviridae	Tequatrovirus	preVC_56	Clustered/Singleton	VC_56_27	1	0	0	0	0	1	1	1	1	1	1	1
Escherichia~phage~slur09	Heunggongvirae	Uroviricota	Caudoviricetes	Caudovirales	Demerecviridae	Tequintavirus	preVC_112	Clustered	VC_112_0	31	0.5988	1	7.58245	0.5988	0.9742	1	1	1	1	1	1
Escherichia~phage~slur14	Heunggongvirae	Uroviricota	Caudoviricetes	Caudovirales	Myoviridae	Tequatrovirus	preVC_56	Clustered	VC_56_1	2	0.0054	0.636502	2	0.0034	1	1	1	1	1	1	1
Escherichia~phage~slur16	Heunggongvirae	Uroviricota	Caudoviricetes	Caudovirales	Myoviridae	Vequintavirus		Overlap (VC_103/VC_104)
Escherichia~phage~teqdroes	Heunggongvirae	Uroviricota	Caudoviricetes	Caudovirales	Myoviridae	Tequatrovirus	preVC_56	Clustered/Singleton	VC_56_18	1	0	0	0	0	1	1	1	1	1	1	1
Escherichia~phage~teqhad	Heunggongvirae	Uroviricota	Caudoviricetes	Caudovirales	Myoviridae	Tequatrovirus	preVC_56	Clustered/Singleton	VC_56_21	1	0	0	0	0	1	1	1	1	1	1	1
Escherichia~phage~teqskov	Heunggongvirae	Uroviricota	Caudoviricetes	Caudovirales	Myoviridae	Tequatrovirus	preVC_56	Clustered/Singleton	VC_56_19	1	0	0	0	0	1	1	1	1	1	1	1
Escherichia~phage~tiwna	Heunggongvirae	Uroviricota	Caudoviricetes	Caudovirales	Drexlerviridae	Warwickvirus	preVC_323	Clustered	VC_323_1	30	0.5951	1	6.23028	0.5951	1	1	1	1	1	1	5
Escherichia~phage~tonijn	Heunggongvirae	Uroviricota	Caudoviricetes	Caudovirales	Drexlerviridae	Warwickvirus	preVC_323	Clustered	VC_323_1	30	0.5951	1	6.23028	0.5951	1	1	1	1	1	1	5
Escherichia~phage~tonn	Heunggongvirae	Uroviricota	Caudoviricetes	Caudovirales	Drexlerviridae	Warwickvirus	preVC_323	Clustered	VC_323_1	30	0.5951	1	6.23028	0.5951	1	1	1	1	1	1	5
Escherichia~phage~tonnikala	Heunggongvirae	Uroviricota	Caudoviricetes	Caudovirales	Drexlerviridae	Warwickvirus	preVC_323	Clustered	VC_323_1	30	0.5951	1	6.23028	0.5951	1	1	1	1	1	1	5
Escherichia~phage~tuntematon	Heunggongvirae	Uroviricota	Caudoviricetes	Caudovirales	Myoviridae	Phapecoctavirus	preVC_106	Clustered	VC_106_1	12	0.4618	1	6.59792	0.4618	1	1	1	1	1	1	1
Escherichia~phage~tunus	Heunggongvirae	Uroviricota	Caudoviricetes	Caudovirales	Drexlerviridae	Warwickvirus	preVC_323	Clustered	VC_323_1	30	0.5951	1	6.23028	0.5951	1	1	1	1	1	1	5
Escherichia~phage~ukendt	Heunggongvirae	Uroviricota	Caudoviricetes	Caudovirales	Myoviridae	Phapecoctavirus	preVC_106	Clustered	VC_106_1	12	0.4618	1	6.59792	0.4618	1	1	1	1	1	1	1
Escherichia~phage~vB_EcoM-12474III	Heunggongvirae	Uroviricota	Caudoviricetes	Caudovirales	Myoviridae	Peduovirus	preVC_177	Clustered	VC_177_0	34	0.6033	1	5.21949	0.6033	1	1	1	1	1	1	6
Escherichia~phage~vB_EcoM-G28	Heunggongvirae	Uroviricota	Caudoviricetes	Caudovirales	Myoviridae	Tequatrovirus	preVC_56	Clustered/Singleton	VC_56_60	1	0	0	0	0	1	1	1	1	1	1	1
Escherichia~phage~vB_EcoM-Ro121c4YLVW	Heunggongvirae	Uroviricota	Caudoviricetes	Caudovirales	Myoviridae	Phapecoctavirus	preVC_106	Clustered	VC_106_1	12	0.4618	1	6.59792	0.4618	1	1	1	1	1	1	1
Escherichia~phage~vB_EcoM-Ro157c2YLVW	Heunggongvirae	Uroviricota	Caudoviricetes	Caudovirales	Myoviridae	Punavirus	preVC_404	Clustered	VC_404_0	6	0.9971	0.997549	7.44173	0.9946	0.8	1	1	1	1	1	1
Escherichia~phage~vB_EcoM-UFV13	Heunggongvirae	Uroviricota	Caudoviricetes	Caudovirales	Myoviridae	Tequatrovirus	preVC_56	Clustered/Singleton	VC_56_7	1	0	0	0	0	1	1	1	1	1	1	1
Escherichia~phage~vB_EcoM-VpaE1	Heunggongvirae	Uroviricota	Caudoviricetes	Caudovirales	Myoviridae	Felixounavirus	preVC_37	Clustered	VC_37_0	25	0.8878	1	5.64039	0.8878	0.9933	1	1	1	1	1	3
Escherichia~phage~vB_EcoM-ep3	Heunggongvirae	Uroviricota	Caudoviricetes	Caudovirales	Myoviridae	Jilinvirus	preVC_20	Clustered	VC_20_0	8	0.4772	1	5.44201	0.4772	1	1	1	1	1	1	1
Escherichia~phage~vB_EcoM-fFiEco06	Heunggongvirae	Uroviricota	Caudoviricetes	Caudovirales	Myoviridae	Tequatrovirus	preVC_56	Clustered/Singleton	VC_56_35	1	0	0	0	0	1	1	1	1	1	1	1
Escherichia~phage~vB_EcoM_005	Heunggongvirae	Uroviricota	Caudoviricetes	Caudovirales	Myoviridae	Dhakavirus	preVC_59	Clustered/Singleton	VC_59_3	1	0	0	0	0	1	1	1	1	1	1	1
Escherichia~phage~vB_EcoM_112	Heunggongvirae	Uroviricota	Caudoviricetes	Caudovirales	Myoviridae	Tequatrovirus	preVC_56	Clustered/Singleton	VC_56_69	1	0	0	0	0	1	1	1	1	1	1	1
Escherichia~phage~vB_EcoM_4HA13	Heunggongvirae	Uroviricota	Caudoviricetes	Caudovirales	Chaseviridae	Sabourvirus	preVC_118	Clustered	VC_118_0	12	0.8618	1	6.12113	0.8618	1	1	1	1	1	2	6
Escherichia~phage~vB_EcoM_ACG-C40	Heunggongvirae	Uroviricota	Caudoviricetes	Caudovirales	Myoviridae	Tequatrovirus	preVC_56	Clustered/Singleton	VC_56_42	1	0	0	0	0	1	1	1	1	1	1	1
Escherichia~phage~vB_EcoM_AYO145A	Heunggongvirae	Uroviricota	Caudoviricetes	Caudovirales	Myoviridae	Felixounavirus	preVC_37	Clustered	VC_37_0	25	0.8878	1	5.64039	0.8878	0.9933	1	1	1	1	1	3
Escherichia~phage~vB_EcoM_Alf5	Heunggongvirae	Uroviricota	Caudoviricetes	Caudovirales	Myoviridae	Felixounavirus	preVC_37	Clustered	VC_37_0	25	0.8878	1	5.64039	0.8878	0.9933	1	1	1	1	1	3
Escherichia~phage~vB_EcoM_DalCa	Heunggongvirae	Uroviricota	Caudoviricetes	Caudovirales	Myoviridae	Tequatrovirus	preVC_56	Clustered/Singleton	VC_56_32	1	0	0	0	0	1	1	1	1	1	1	1
Escherichia~phage~vB_EcoM_ECO1230-10	Heunggongvirae	Uroviricota	Caudoviricetes	Caudovirales	Myoviridae	Jilinvirus	preVC_20	Clustered	VC_20_0	8	0.4772	1	5.44201	0.4772	1	1	1	1	1	1	1
Escherichia~phage~vB_EcoM_ECOO78	Heunggongvirae	Uroviricota	Caudoviricetes	Caudovirales	Myoviridae	Jilinvirus	preVC_20	Clustered	VC_20_0	8	0.4772	1	5.44201	0.4772	1	1	1	1	1	1	1
Escherichia~phage~vB_EcoM_F1	Heunggongvirae	Uroviricota	Caudoviricetes	Caudovirales	Myoviridae	Tequatrovirus	preVC_56	Clustered/Singleton	VC_56_71	1	0	0	0	0	1	1	1	1	1	1	1
Escherichia~phage~vB_EcoM_G4498	Heunggongvirae	Uroviricota	Caudoviricetes	Caudovirales	Myoviridae	Tequatrovirus	preVC_56	Clustered/Singleton	VC_56_43	1	0	0	0	0	1	1	1	1	1	1	1
Escherichia~phage~vB_EcoM_G4507	Heunggongvirae	Uroviricota	Caudoviricetes	Caudovirales	Myoviridae	Tequatrovirus	preVC_56	Clustered/Singleton	VC_56_47	1	0	0	0	0	1	1	1	1	1	1	1
Escherichia~phage~vB_EcoM_G50	Heunggongvirae	Uroviricota	Caudoviricetes	Caudovirales	Myoviridae	Tequatrovirus	preVC_56	Clustered/Singleton	VC_56_8	1	0	0	0	0	1	1	1	1	1	1	1
Escherichia~phage~vB_EcoM_G8	Heunggongvirae	Uroviricota	Caudoviricetes	Caudovirales	Myoviridae	Tequatrovirus	preVC_56	Clustered/Singleton	VC_56_29	1	0	0	0	0	1	1	1	1	1	1	1
Escherichia~phage~vB_EcoM_G9062	Heunggongvirae	Uroviricota	Caudoviricetes	Caudovirales	Myoviridae	Tequatrovirus	preVC_56	Clustered/Singleton	VC_56_38	1	0	0	0	0	1	1	1	1	1	1	1
Escherichia~phage~vB_EcoM_Goslar	Heunggongvirae	Uroviricota	Caudoviricetes	Caudovirales	Myoviridae	Goslarvirus	preVC_358	Clustered/Singleton	VC_358_1	1	0	0	0	0	1	1	1	1	1	1	1
Escherichia~phage~vB_EcoM_IME537	Heunggongvirae	Uroviricota	Caudoviricetes	Caudovirales	Myoviridae	Tequatrovirus	preVC_56	Clustered	VC_56_63	2	0.0054	0.628984	8.3666	0.0034	1	1	1	1	1	1	1
Escherichia~phage~vB_EcoM_JS09	Heunggongvirae	Uroviricota	Caudoviricetes	Caudovirales	Myoviridae	Mosigvirus	preVC_57	Clustered	VC_57_0	17	0.1836	1	6.97356	0.1836	0.9485	1	1	1	1	1	2
Escherichia~phage~vB_EcoM_KAW1E185	Heunggongvirae	Uroviricota	Caudoviricetes	Caudovirales	Myoviridae	Tequatrovirus	preVC_56	Clustered/Singleton	VC_56_9	1	0	0	0	0	1	1	1	1	1	1	1
Escherichia~phage~vB_EcoM_KWBSE43-6	Heunggongvirae	Uroviricota	Caudoviricetes	Caudovirales	Ackermannviridae	Taipeivirus	preVC_50	Clustered	VC_50_0	8	0.0624	0.989446	7.5563	0.0617	0.9643	1	1	1	1	1	1
Escherichia~phage~vB_EcoM_Lutter	Heunggongvirae	Uroviricota	Caudoviricetes	Caudovirales	Myoviridae	Tequatrovirus	preVC_56	Clustered/Singleton	VC_56_3	1	0	0	0	0	1	1	1	1	1	1	1
Escherichia~phage~vB_EcoM_NBG2	Heunggongvirae	Uroviricota	Caudoviricetes	Caudovirales	Myoviridae	Tequatrovirus	preVC_56	Clustered/Singleton	VC_56_68	1	0	0	0	0	1	1	1	1	1	1	1
Escherichia~phage~vB_EcoM_OE5505	Heunggongvirae	Uroviricota	Caudoviricetes	Caudovirales	Myoviridae	Tequatrovirus	preVC_56	Clustered/Singleton	VC_56_34	1	0	0	0	0	1	1	1	1	1	1	1
Escherichia~phage~vB_EcoM_Ozark	Heunggongvirae	Uroviricota	Caudoviricetes	Caudovirales	Myoviridae	Tequatrovirus	preVC_56	Clustered/Singleton	VC_56_20	1	0	0	0	0	1	1	1	1	1	1	1
Escherichia~phage~vB_EcoM_PHB05	Heunggongvirae	Uroviricota	Caudoviricetes	Caudovirales	Myoviridae	Unassigned	preVC_106	Clustered	VC_106_0	6	0.1659	0.999993	5.92869	0.1659	1	1	1	1	1	1	0
Escherichia~phage~vB_EcoM_PhAPEC2	Heunggongvirae	Uroviricota	Caudoviricetes	Caudovirales	Myoviridae	Mosigvirus	preVC_57	Clustered	VC_57_0	17	0.1836	1	6.97356	0.1836	0.9485	1	1	1	1	1	2
Escherichia~phage~vB_EcoM_Schickermooser	Heunggongvirae	Uroviricota	Caudoviricetes	Caudovirales	Myoviridae	Phapecoctavirus	preVC_106	Clustered	VC_106_1	12	0.4618	1	6.59792	0.4618	1	1	1	1	1	1	1
Escherichia~phage~vB_EcoM_VR20	Heunggongvirae	Uroviricota	Caudoviricetes	Caudovirales	Myoviridae	Gaprivervirus	preVC_59	Clustered	VC_59_0	5	0.0401	1	8.33267	0.0401	0.7	1	1	1	1	1	1
Escherichia~phage~vB_EcoM_VR25	Heunggongvirae	Uroviricota	Caudoviricetes	Caudovirales	Myoviridae	Gaprivervirus	preVC_59	Clustered	VC_59_0	5	0.0401	1	8.33267	0.0401	0.7	1	1	1	1	1	1
Escherichia~phage~vB_EcoM_VR26	Heunggongvirae	Uroviricota	Caudoviricetes	Caudovirales	Myoviridae	Gaprivervirus	preVC_59	Clustered	VC_59_0	5	0.0401	1	8.33267	0.0401	0.7	1	1	1	1	1	1
Escherichia~phage~vB_EcoM_VR7	Heunggongvirae	Uroviricota	Caudoviricetes	Caudovirales	Myoviridae	Gaprivervirus	preVC_59	Clustered	VC_59_0	5	0.0401	1	8.33267	0.0401	0.7	1	1	1	1	1	1
Escherichia~phage~vB_EcoM_WFC	Heunggongvirae	Uroviricota	Caudoviricetes	Caudovirales	Myoviridae	Wifcevirus		Overlap (VC_295/VC_296)
Escherichia~phage~vB_EcoM_WFH	Heunggongvirae	Uroviricota	Caudoviricetes	Caudovirales	Myoviridae	Wifcevirus		Overlap (VC_295/VC_296)
Escherichia~phage~vB_EcoP_24B	Heunggongvirae	Uroviricota	Caudoviricetes	Caudovirales	Podoviridae	Traversvirus	preVC_361	Clustered	VC_361_1	23	0.614	1	7.6319	0.614	0.8814	1	1	1	1	1	3
Escherichia~phage~vB_EcoP_ACG-C91	Heunggongvirae	Uroviricota	Caudoviricetes	Caudovirales	Autographiviridae	Vectrevirus	preVC_339	Clustered	VC_339_0	19	0.6167	1	4.80314	0.6167	1	1	1	1	1	1	5
Escherichia~phage~vB_EcoP_B	Heunggongvirae	Uroviricota	Caudoviricetes	Caudovirales	Autographiviridae	Vectrevirus	preVC_339	Clustered	VC_339_0	19	0.6167	1	4.80314	0.6167	1	1	1	1	1	1	5
Escherichia~phage~vB_EcoP_C	Heunggongvirae	Uroviricota	Caudoviricetes	Caudovirales	Autographiviridae	Vectrevirus	preVC_339	Clustered	VC_339_0	19	0.6167	1	4.80314	0.6167	1	1	1	1	1	1	5
Escherichia~phage~vB_EcoP_F	Heunggongvirae	Uroviricota	Caudoviricetes	Caudovirales	Autographiviridae	Kayfunavirus	preVC_327	Clustered	VC_327_0	20	0.7348	1	4.47304	0.7348	1	1	1	1	1	1	1
Escherichia~phage~vB_EcoP_G7C	Heunggongvirae	Uroviricota	Caudoviricetes	Caudovirales	Schitoviridae	Gamaleyavirus	preVC_8	Clustered	VC_8_0	27	0.7083	1	7.98326	0.7083	0.7094	1	1	1	1	1	14
Escherichia~phage~vB_EcoP_K	Heunggongvirae	Uroviricota	Caudoviricetes	Caudovirales	Autographiviridae	Vectrevirus	preVC_339	Clustered	VC_339_0	19	0.6167	1	4.80314	0.6167	1	1	1	1	1	1	5
Escherichia~phage~vB_EcoP_PhAPEC5	Heunggongvirae	Uroviricota	Caudoviricetes	Caudovirales	Schitoviridae	Gamaleyavirus	preVC_8	Clustered	VC_8_0	27	0.7083	1	7.98326	0.7083	0.7094	1	1	1	1	1	14
Escherichia~phage~vB_EcoP_PhAPEC7	Heunggongvirae	Uroviricota	Caudoviricetes	Caudovirales	Schitoviridae	Gamaleyavirus	preVC_8	Clustered	VC_8_0	27	0.7083	1	7.98326	0.7083	0.7094	1	1	1	1	1	14
Escherichia~phage~vB_EcoP_S523	Heunggongvirae	Uroviricota	Caudoviricetes	Caudovirales	Autographiviridae	Berlinvirus	preVC_328	Clustered	VC_328_0	64	0.8177	1	6.73071	0.8177	0.999	1	1	1	1	1	11
Escherichia~phage~vB_EcoP_SU10	Heunggongvirae	Uroviricota	Caudoviricetes	Caudovirales	Podoviridae	Kuravirus	preVC_108	Clustered	VC_108_0	6	0.6707	1	6.20173	0.6707	1	1	1	1	1	1	1
Escherichia~phage~vB_EcoS-12210I	Heunggongvirae	Uroviricota	Caudoviricetes	Caudovirales	Drexlerviridae	Veterinaerplatzvirus	preVC_325	Clustered	VC_325_0	19	0.6449	1	5.56753	0.6449	1	1	1	1	1	1	9
Escherichia~phage~vB_EcoS-95	Heunggongvirae	Uroviricota	Caudoviricetes	Caudovirales	Drexlerviridae	Warwickvirus	preVC_323	Clustered	VC_323_1	30	0.5951	1	6.23028	0.5951	1	1	1	1	1	1	5
Escherichia~phage~vB_EcoS-DELF2	Heunggongvirae	Uroviricota	Caudoviricetes	Caudovirales	Drexlerviridae	Tunavirus	preVC_324	Clustered	VC_324_0	18	0.5327	1	4.9396	0.5327	1	1	1	1	1	1	3
Escherichia~phage~vB_EcoS-IME253	Heunggongvirae	Uroviricota	Caudoviricetes	Caudovirales	Drexlerviridae	Rtpvirus	preVC_325	Clustered	VC_325_0	19	0.6449	1	5.56753	0.6449	1	1	1	1	1	1	9
Escherichia~phage~vB_EcoS_ACG-M12	Heunggongvirae	Uroviricota	Caudoviricetes	Caudovirales	Drexlerviridae	Guelphvirus	preVC_325	Clustered	VC_325_0	19	0.6449	1	5.56753	0.6449	1	1	1	1	1	1	9
Escherichia~phage~vB_EcoS_AHP42	Heunggongvirae	Uroviricota	Caudoviricetes	Caudovirales	Drexlerviridae	Rogunavirus	preVC_325	Clustered	VC_325_0	19	0.6449	1	5.56753	0.6449	1	1	1	1	1	1	9
Escherichia~phage~vB_EcoS_AHS24	Heunggongvirae	Uroviricota	Caudoviricetes	Caudovirales	Drexlerviridae	Rogunavirus	preVC_325	Clustered	VC_325_0	19	0.6449	1	5.56753	0.6449	1	1	1	1	1	1	9
Escherichia~phage~vB_EcoS_AKFV33	Heunggongvirae	Uroviricota	Caudoviricetes	Caudovirales	Demerecviridae	Tequintavirus	preVC_112	Clustered	VC_112_0	31	0.5988	1	7.58245	0.5988	0.9742	1	1	1	1	1	1
Escherichia~phage~vB_EcoS_AKS96	Heunggongvirae	Uroviricota	Caudoviricetes	Caudovirales	Drexlerviridae	Rogunavirus	preVC_325	Clustered	VC_325_0	19	0.6449	1	5.56753	0.6449	1	1	1	1	1	1	9
Escherichia~phage~vB_EcoS_CEB_EC3a	Heunggongvirae	Uroviricota	Caudoviricetes	Caudovirales	Drexlerviridae	Guelphvirus	preVC_325	Clustered	VC_325_0	19	0.6449	1	5.56753	0.6449	1	1	1	1	1	1	9
Escherichia~phage~vB_EcoS_ESCO41	Heunggongvirae	Uroviricota	Caudoviricetes	Caudovirales	Drexlerviridae	Nouzillyvirus		Outlier
Escherichia~phage~vB_EcoS_FFH_1	Heunggongvirae	Uroviricota	Caudoviricetes	Caudovirales	Demerecviridae	Tequintavirus	preVC_112	Clustered	VC_112_0	31	0.5988	1	7.58245	0.5988	0.9742	1	1	1	1	1	1
Escherichia~phage~vB_EcoS_G29-2	Heunggongvirae	Uroviricota	Caudoviricetes	Caudovirales	Drexlerviridae	Hanrivervirus	preVC_323	Clustered	VC_323_1	30	0.5951	1	6.23028	0.5951	1	1	1	1	1	1	5
Escherichia~phage~vB_EcoS_HdH2	Heunggongvirae	Uroviricota	Caudoviricetes	Caudovirales	Demerecviridae	Tequintavirus	preVC_112	Clustered	VC_112_0	31	0.5988	1	7.58245	0.5988	0.9742	1	1	1	1	1	1
Escherichia~phage~vB_EcoS_IME347	Heunggongvirae	Uroviricota	Caudoviricetes	Caudovirales	Drexlerviridae	Badaguanvirus	preVC_324	Clustered	VC_324_0	18	0.5327	1	4.9396	0.5327	1	1	1	1	1	1	3
Escherichia~phage~vB_EcoS_IME542	Heunggongvirae	Uroviricota	Caudoviricetes	Caudovirales	Drexlerviridae	Christensenvirus	preVC_325	Clustered	VC_325_0	19	0.6449	1	5.56753	0.6449	1	1	1	1	1	1	9
Escherichia~phage~vB_EcoS_NBD2	Heunggongvirae	Uroviricota	Caudoviricetes	Caudovirales	Drexlerviridae	Vilniusvirus		Outlier
Escherichia~phage~vB_EcoS_PHB17	Heunggongvirae	Uroviricota	Caudoviricetes	Caudovirales	Drexlerviridae	Changchunvirus	preVC_323	Clustered	VC_323_1	30	0.5951	1	6.23028	0.5951	1	1	1	1	1	1	5
Escherichia~phage~vB_EcoS_SH2	Heunggongvirae	Uroviricota	Caudoviricetes	Caudovirales	Drexlerviridae	Tunavirus	preVC_324	Clustered	VC_324_0	18	0.5327	1	4.9396	0.5327	1	1	1	1	1	1	3
Escherichia~phage~vB_EcoS_W011D	Heunggongvirae	Uroviricota	Caudoviricetes	Caudovirales	Drexlerviridae	Changchunvirus	preVC_323	Clustered	VC_323_1	30	0.5951	1	6.23028	0.5951	1	1	1	1	1	1	5
Escherichia~phage~vB_EcoS_swan01	Heunggongvirae	Uroviricota	Caudoviricetes	Caudovirales	Drexlerviridae	Warwickvirus	preVC_323	Clustered	VC_323_1	30	0.5951	1	6.23028	0.5951	1	1	1	1	1	1	5
Escherichia~phage~vB_EcoS_swi2	Heunggongvirae	Uroviricota	Caudoviricetes	Caudovirales	Siphoviridae	Unassigned	preVC_121	Clustered	VC_121_0	24	0.9256	1	7.36638	0.9256	0.9674	1	1	1	1	1	1
Escherichia~phage~vB_EcoS~Sa179lw	Heunggongvirae	Uroviricota	Caudoviricetes	Caudovirales	Siphoviridae	Unassigned	preVC_121	Clustered	VC_121_0	24	0.9256	1	7.36638	0.9256	0.9674	1	1	1	1	1	1
Escherichia~phage~vB_Eco_SLUR29	Heunggongvirae	Uroviricota	Caudoviricetes	Caudovirales	Drexlerviridae	Warwickvirus	preVC_323	Clustered	VC_323_1	30	0.5951	1	6.23028	0.5951	1	1	1	1	1	1	5
Escherichia~phage~vB_Eco_mar001J1	Heunggongvirae	Uroviricota	Caudoviricetes	Caudovirales	Drexlerviridae	Warwickvirus	preVC_323	Clustered	VC_323_1	30	0.5951	1	6.23028	0.5951	1	1	1	1	1	1	5
Escherichia~phage~vB_Eco_mar003J3	Heunggongvirae	Uroviricota	Caudoviricetes	Caudovirales	Demerecviridae	Epseptimavirus	preVC_113	Clustered	VC_113_0	33	0.6222	1	7.33185	0.6222	0.9886	1	1	1	1	1	1
Escherichia~phage~vB_Eco_mar004NP2	Heunggongvirae	Uroviricota	Caudoviricetes	Caudovirales	Demerecviridae	Tequintavirus	preVC_112	Clustered	VC_112_0	31	0.5988	1	7.58245	0.5988	0.9742	1	1	1	1	1	1
Escherichia~phage~vB_vPM_PD06	Heunggongvirae	Uroviricota	Caudoviricetes	Caudovirales	Myoviridae	Unassigned	preVC_106	Clustered	VC_106_0	6	0.1659	0.999993	5.92869	0.1659	1	1	1	1	1	1	0
Escherichia~phage~vB_vPM_PD112	Heunggongvirae	Uroviricota	Caudoviricetes	Caudovirales	Myoviridae	Tequatrovirus	preVC_56	Clustered	VC_56_63	2	0.0054	0.628984	8.3666	0.0034	1	1	1	1	1	1	1
Escherichia~phage~vb_EcoM-VR5	Heunggongvirae	Uroviricota	Caudoviricetes	Caudovirales	Myoviridae	Dhakavirus	preVC_59	Clustered	VC_59_1	10	0.0984	1	7.81971	0.0984	0.9333	1	1	1	1	1	1
Escherichia~phage~vojen	Heunggongvirae	Uroviricota	Caudoviricetes	Caudovirales	Drexlerviridae	Hanrivervirus	preVC_323	Clustered	VC_323_1	30	0.5951	1	6.23028	0.5951	1	1	1	1	1	1	5
Escherichia~phage~wV7	Heunggongvirae	Uroviricota	Caudoviricetes	Caudovirales	Myoviridae	Tequatrovirus	preVC_56	Clustered/Singleton	VC_56_49	1	0	0	0	0	1	1	1	1	1	1	1
Escherichia~phage~wV8	Heunggongvirae	Uroviricota	Caudoviricetes	Caudovirales	Myoviridae	Felixounavirus	preVC_37	Clustered	VC_37_0	25	0.8878	1	5.64039	0.8878	0.9933	1	1	1	1	1	3
Escherichia~typing~phage~1	Heunggongvirae	Uroviricota	Caudoviricetes	Caudovirales	Myoviridae	Felixounavirus	preVC_37	Clustered	VC_37_0	25	0.8878	1	5.64039	0.8878	0.9933	1	1	1	1	1	3
Escherichia~virus~AAPEc6	Heunggongvirae	Uroviricota	Caudoviricetes	Caudovirales	Autographiviridae	Vectrevirus	preVC_339	Clustered	VC_339_0	19	0.6167	1	4.80314	0.6167	1	1	1	1	1	1	5
Escherichia~virus~BF23	Heunggongvirae	Uroviricota	Caudoviricetes	Caudovirales	Demerecviridae	Tequintavirus		Outlier
Escherichia~virus~DT57C	Heunggongvirae	Uroviricota	Caudoviricetes	Caudovirales	Demerecviridae	Tequintavirus	preVC_112	Clustered	VC_112_0	31	0.5988	1	7.58245	0.5988	0.9742	1	1	1	1	1	1
Escherichia~virus~JL1	Heunggongvirae	Uroviricota	Caudoviricetes	Caudovirales	Siphoviridae	Dhillonvirus	preVC_364	Clustered	VC_364_0	10	0.7225	1	3.99895	0.7225	1	1	1	1	1	1	1
Escherichia~virus~K1-5	Heunggongvirae	Uroviricota	Caudoviricetes	Caudovirales	Autographiviridae	Vectrevirus	preVC_339	Clustered	VC_339_0	19	0.6167	1	4.80314	0.6167	1	1	1	1	1	1	5
Escherichia~virus~K1E	Heunggongvirae	Uroviricota	Caudoviricetes	Caudovirales	Autographiviridae	Vectrevirus	preVC_339	Clustered	VC_339_0	19	0.6167	1	4.80314	0.6167	1	1	1	1	1	1	5
Escherichia~virus~KFS-EC	Heunggongvirae	Uroviricota	Caudoviricetes	Caudovirales	Myoviridae	Krischvirus	preVC_58	Clustered	VC_58_0	6	0.1846	1	5.59762	0.1846	1	1	1	1	1	1	1
Escherichia~virus~Lambda	Heunggongvirae	Uroviricota	Caudoviricetes	Caudovirales	Siphoviridae	Lambdavirus		Overlap (VC_303/VC_364)
Escherichia~virus~Lambda_1H12	Heunggongvirae	Uroviricota	Caudoviricetes	Caudovirales	Siphoviridae	Lambdavirus		Overlap (VC_303/VC_364)
Escherichia~virus~Lambda_2B8	Heunggongvirae	Uroviricota	Caudoviricetes	Caudovirales	Siphoviridae	Lambdavirus		Overlap (VC_303/VC_364)
Escherichia~virus~Lambda_2G7b	Heunggongvirae	Uroviricota	Caudoviricetes	Caudovirales	Siphoviridae	Lambdavirus		Overlap (VC_303/VC_364)
Escherichia~virus~Lambda_4A7	Heunggongvirae	Uroviricota	Caudoviricetes	Caudovirales	Siphoviridae	Lambdavirus		Overlap (VC_303/VC_364)
Escherichia~virus~P2-2H1	Heunggongvirae	Uroviricota	Caudoviricetes	Caudovirales	Myoviridae	Peduovirus	preVC_177	Clustered	VC_177_0	34	0.6033	1	5.21949	0.6033	1	1	1	1	1	1	6
Escherichia~virus~P2-2H4	Heunggongvirae	Uroviricota	Caudoviricetes	Caudovirales	Myoviridae	Peduovirus	preVC_177	Clustered	VC_177_0	34	0.6033	1	5.21949	0.6033	1	1	1	1	1	1	6
Escherichia~virus~P2-4A7b	Heunggongvirae	Uroviricota	Caudoviricetes	Caudovirales	Myoviridae	Peduovirus	preVC_177	Clustered	VC_177_0	34	0.6033	1	5.21949	0.6033	1	1	1	1	1	1	6
Escherichia~virus~P2-4B2	Heunggongvirae	Uroviricota	Caudoviricetes	Caudovirales	Myoviridae	Peduovirus	preVC_177	Clustered	VC_177_0	34	0.6033	1	5.21949	0.6033	1	1	1	1	1	1	6
Escherichia~virus~P2-4C9	Heunggongvirae	Uroviricota	Caudoviricetes	Caudovirales	Myoviridae	Peduovirus	preVC_177	Clustered	VC_177_0	34	0.6033	1	5.21949	0.6033	1	1	1	1	1	1	6
Escherichia~virus~P2-4E6b	Heunggongvirae	Uroviricota	Caudoviricetes	Caudovirales	Myoviridae	Peduovirus	preVC_177	Clustered	VC_177_0	34	0.6033	1	5.21949	0.6033	1	1	1	1	1	1	6
Escherichia~virus~P88-4B11	Heunggongvirae	Uroviricota	Caudoviricetes	Caudovirales	Myoviridae	Xuanwuvirus		Overlap (VC_177/VC_178)
Escherichia~virus~RB14	Heunggongvirae	Uroviricota	Caudoviricetes	Caudovirales	Myoviridae	Tequatrovirus	preVC_56	Clustered/Singleton	VC_56_55	1	0	0	0	0	1	1	1	1	1	1	1
Escherichia~virus~RB16	Heunggongvirae	Uroviricota	Caudoviricetes	Caudovirales	Myoviridae	Pseudotevenvirus	preVC_93	Clustered	VC_93_1	10	0.2816	1	6.92403	0.2816	1	1	1	1	1	1	1
Escherichia~virus~RB32	Heunggongvirae	Uroviricota	Caudoviricetes	Caudovirales	Myoviridae	Tequatrovirus	preVC_56	Clustered/Singleton	VC_56_22	1	0	0	0	0	1	1	1	1	1	1	1
Escherichia~virus~RB43	Heunggongvirae	Uroviricota	Caudoviricetes	Caudovirales	Myoviridae	Pseudotevenvirus	preVC_93	Clustered	VC_93_1	10	0.2816	1	6.92403	0.2816	1	1	1	1	1	1	1
Escherichia~virus~Rtp	Heunggongvirae	Uroviricota	Caudoviricetes	Caudovirales	Drexlerviridae	Rtpvirus	preVC_325	Clustered	VC_325_0	19	0.6449	1	5.56753	0.6449	1	1	1	1	1	1	9
Escherichia~virus~SSL2009a	Heunggongvirae	Uroviricota	Caudoviricetes	Caudovirales	Siphoviridae	Dhillonvirus	preVC_364	Clustered	VC_364_0	10	0.7225	1	3.99895	0.7225	1	1	1	1	1	1	1
Escherichia~virus~T4	Heunggongvirae	Uroviricota	Caudoviricetes	Caudovirales	Myoviridae	Tequatrovirus	preVC_56	Clustered/Singleton	VC_56_76	1	0	0	0	0	1	1	1	1	1	1	1
Escherichia~virus~VEc3	Heunggongvirae	Uroviricota	Caudoviricetes	Caudovirales	Autographiviridae	Vectrevirus	preVC_339	Clustered	VC_339_0	19	0.6167	1	4.80314	0.6167	1	1	1	1	1	1	5
Escherichia~virus~VEc33	Heunggongvirae	Uroviricota	Caudoviricetes	Caudovirales	Demerecviridae	Tequintavirus	preVC_112	Clustered	VC_112_0	31	0.5988	1	7.58245	0.5988	0.9742	1	1	1	1	1	1
Escherichia~virus~Vec13	Heunggongvirae	Uroviricota	Caudoviricetes	Caudovirales	Autographiviridae	Kayfunavirus	preVC_327	Clustered	VC_327_0	20	0.7348	1	4.47304	0.7348	1	1	1	1	1	1	1
Escherichia~virus~mutPK1A2	Heunggongvirae	Uroviricota	Caudoviricetes	Caudovirales	Autographiviridae	Vectrevirus	preVC_339	Clustered	VC_339_0	19	0.6167	1	4.80314	0.6167	1	1	1	1	1	1	5
Faecalibacterium~phage~FP_Brigit	Heunggongvirae	Uroviricota	Caudoviricetes	Caudovirales	Myoviridae	Brigitvirus		Outlier
Faecalibacterium~phage~FP_Epona	Heunggongvirae	Uroviricota	Caudoviricetes	Caudovirales	Myoviridae	Eponavirus	preVC_264	Clustered	VC_264_0	5	0.6422	0.287213	7.58571	0.1844	1	1	1	1	1	1	4
Faecalibacterium~phage~FP_Lagaffe	Heunggongvirae	Uroviricota	Caudoviricetes	Caudovirales	Myoviridae	Lagaffevirus	preVC_264	Clustered	VC_264_0	5	0.6422	0.287213	7.58571	0.1844	1	1	1	1	1	1	4
Faecalibacterium~phage~FP_Mushu	Heunggongvirae	Uroviricota	Caudoviricetes	Caudovirales	Myoviridae	Mushuvirus	preVC_232	Clustered	VC_232_0	2	0.04	0.722013	6.78233	0.0289	1	1	1	1	1	1	1
Faecalibacterium~phage~FP_Taranis	Heunggongvirae	Uroviricota	Caudoviricetes	Caudovirales	Myoviridae	Taranisvirus	preVC_264	Clustered	VC_264_0	5	0.6422	0.287213	7.58571	0.1844	1	1	1	1	1	1	4
Faecalibacterium~phage~FP_Toutatis	Heunggongvirae	Uroviricota	Caudoviricetes	Caudovirales	Myoviridae	Toutatisvirus	preVC_264	Clustered	VC_264_0	5	0.6422	0.287213	7.58571	0.1844	1	1	1	1	1	1	4
Faecalibacterium~phage~FP_oengus	Heunggongvirae	Uroviricota	Caudoviricetes	Caudovirales	Siphoviridae	Oengusvirus	preVC_163	Clustered/Singleton	VC_163_0	1	0	0	0	0	1	1	1	1	1	1	1
Flavobacterium~phage~11b	Heunggongvirae	Uroviricota	Caudoviricetes	Caudovirales	Siphoviridae	Unassigned		Outlier
Flavobacterium~phage~1H	Heunggongvirae	Uroviricota	Caudoviricetes	Caudovirales	Siphoviridae	Unahavirus	preVC_422	Clustered	VC_422_0	5	1	0	4.10595	0	1	1	1	1	1	1	2
Flavobacterium~phage~23T	Heunggongvirae	Uroviricota	Caudoviricetes	Caudovirales	Siphoviridae	Unahavirus	preVC_422	Clustered	VC_422_0	5	1	0	4.10595	0	1	1	1	1	1	1	2
Flavobacterium~phage~2A	Heunggongvirae	Uroviricota	Caudoviricetes	Caudovirales	Siphoviridae	Unahavirus	preVC_422	Clustered	VC_422_0	5	1	0	4.10595	0	1	1	1	1	1	1	2
Flavobacterium~phage~6H	Heunggongvirae	Uroviricota	Caudoviricetes	Caudovirales	Siphoviridae	Unahavirus	preVC_422	Clustered	VC_422_0	5	1	0	4.10595	0	1	1	1	1	1	1	2
Flavobacterium~phage~FCL-2	Heunggongvirae	Uroviricota	Caudoviricetes	Caudovirales	Myoviridae	Ficleduovirus	preVC_318	Clustered	VC_318_0	2	0.7034	0.5205	3.16228	0.3661	1	1	1	1	1	1	1
Flavobacterium~phage~FCV-1	Heunggongvirae	Uroviricota	Caudoviricetes	Caudovirales	Myoviridae	Ficleduovirus	preVC_318	Clustered	VC_318_0	2	0.7034	0.5205	3.16228	0.3661	1	1	1	1	1	1	1
Flavobacterium~phage~FpV4	Heunggongvirae	Uroviricota	Caudoviricetes	Caudovirales	Podoviridae	Fipvunavirus	preVC_267	Clustered	VC_267_0	5	0.9872	0.999822	2.27118	0.987	1	1	1	1	1	1	1
Flavobacterium~phage~Fpv1	Heunggongvirae	Uroviricota	Caudoviricetes	Caudovirales	Podoviridae	Fipvunavirus	preVC_267	Clustered	VC_267_0	5	0.9872	0.999822	2.27118	0.987	1	1	1	1	1	1	1
Flavobacterium~phage~Fpv10	Heunggongvirae	Uroviricota	Caudoviricetes	Caudovirales	Siphoviridae	Unassigned	preVC_265	Clustered	VC_265_0	6	0.854	1	0	0.854	1	1	1	1	1	1	0
Flavobacterium~phage~Fpv11	Heunggongvirae	Uroviricota	Caudoviricetes	Caudovirales	Siphoviridae	Unassigned	preVC_265	Clustered	VC_265_0	6	0.854	1	0	0.854	1	1	1	1	1	1	0
Flavobacterium~phage~Fpv2	Heunggongvirae	Uroviricota	Caudoviricetes	Caudovirales	Podoviridae	Fipvunavirus	preVC_267	Clustered	VC_267_0	5	0.9872	0.999822	2.27118	0.987	1	1	1	1	1	1	1
Flavobacterium~phage~Fpv20	Heunggongvirae	Uroviricota	Caudoviricetes	Caudovirales	Podoviridae	Fipvunavirus	preVC_267	Clustered	VC_267_0	5	0.9872	0.999822	2.27118	0.987	1	1	1	1	1	1	1
Flavobacterium~phage~Fpv3	Heunggongvirae	Uroviricota	Caudoviricetes	Caudovirales	Podoviridae	Fipvunavirus	preVC_267	Clustered	VC_267_0	5	0.9872	0.999822	2.27118	0.987	1	1	1	1	1	1	1
Flavobacterium~phage~Fpv5	Heunggongvirae	Uroviricota	Caudoviricetes	Caudovirales	Siphoviridae	Unassigned	preVC_265	Clustered	VC_265_0	6	0.854	1	0	0.854	1	1	1	1	1	1	0
Flavobacterium~phage~Fpv6	Heunggongvirae	Uroviricota	Caudoviricetes	Caudovirales	Siphoviridae	Unassigned	preVC_265	Clustered	VC_265_0	6	0.854	1	0	0.854	1	1	1	1	1	1	0
Flavobacterium~phage~Fpv7	Heunggongvirae	Uroviricota	Caudoviricetes	Caudovirales	Siphoviridae	Unassigned	preVC_265	Clustered	VC_265_0	6	0.854	1	0	0.854	1	1	1	1	1	1	0
Flavobacterium~phage~Fpv8	Heunggongvirae	Uroviricota	Caudoviricetes	Caudovirales	Siphoviridae	Unassigned	preVC_265	Clustered	VC_265_0	6	0.854	1	0	0.854	1	1	1	1	1	1	0
Flavobacterium~phage~vB_FspM_immuto_2-6A	Heunggongvirae	Uroviricota	Caudoviricetes	Caudovirales	Myoviridae	Unassigned		Singleton
Flavobacterium~phage~vB_FspM_lotta8-1	Heunggongvirae	Uroviricota	Caudoviricetes	Caudovirales	Myoviridae	Pippivirus	preVC_314	Clustered	VC_314_0	2	0.7476	0.836813	0	0.6256	1	1	1	1	1	1	1
Flavobacterium~phage~vB_FspM_pippi8-1	Heunggongvirae	Uroviricota	Caudoviricetes	Caudovirales	Myoviridae	Pippivirus	preVC_314	Clustered	VC_314_0	2	0.7476	0.836813	0	0.6256	1	1	1	1	1	1	1
Flavobacterium~phage~vB_FspP_elemoA_7-9A	Heunggongvirae	Uroviricota	Caudoviricetes	Caudovirales	Podoviridae	Unassigned	preVC_316	Clustered	VC_316_0	4	0.9626	0.986078	3.03082	0.9492	1	1	1	1	1	1	0
Flavobacterium~phage~vB_FspP_elemoD_13-5B	Heunggongvirae	Uroviricota	Caudoviricetes	Caudovirales	Podoviridae	Unassigned	preVC_316	Clustered	VC_316_0	4	0.9626	0.986078	3.03082	0.9492	1	1	1	1	1	1	0
Flavobacterium~phage~vB_FspP_elemoE_6-9C	Heunggongvirae	Uroviricota	Caudoviricetes	Caudovirales	Podoviridae	Unassigned	preVC_316	Clustered	VC_316_0	4	0.9626	0.986078	3.03082	0.9492	1	1	1	1	1	1	0
Flavobacterium~phage~vB_FspP_elemoF_6-3D	Heunggongvirae	Uroviricota	Caudoviricetes	Caudovirales	Podoviridae	Unassigned	preVC_316	Clustered	VC_316_0	4	0.9626	0.986078	3.03082	0.9492	1	1	1	1	1	1	0
Flavobacterium~phage~vB_FspS_filifjonk9-1	Heunggongvirae	Uroviricota	Caudoviricetes	Caudovirales	Siphoviridae	Muminvirus	preVC_317	Clustered	VC_317_0	12	0.9955	1	5.74963	0.9955	1	1	1	1	1	1	3
Flavobacterium~phage~vB_FspS_hattifnatt9-1	Heunggongvirae	Uroviricota	Caudoviricetes	Caudovirales	Siphoviridae	Hattifnattvirus	preVC_317	Clustered	VC_317_0	12	0.9955	1	5.74963	0.9955	1	1	1	1	1	1	3
Flavobacterium~phage~vB_FspS_hemulen6-1	Heunggongvirae	Uroviricota	Caudoviricetes	Caudovirales	Siphoviridae	Lillamyvirus	preVC_317	Clustered	VC_317_0	12	0.9955	1	5.74963	0.9955	1	1	1	1	1	1	3
Flavobacterium~phage~vB_FspS_laban6-1	Heunggongvirae	Uroviricota	Caudoviricetes	Caudovirales	Siphoviridae	Labanvirus	preVC_422	Clustered	VC_422_0	5	1	0	4.10595	0	1	1	1	1	1	1	2
Flavobacterium~phage~vB_FspS_lillamy9-1	Heunggongvirae	Uroviricota	Caudoviricetes	Caudovirales	Siphoviridae	Lillamyvirus	preVC_317	Clustered	VC_317_0	12	0.9955	1	5.74963	0.9955	1	1	1	1	1	1	3
Flavobacterium~phage~vB_FspS_morran9-1	Heunggongvirae	Uroviricota	Caudoviricetes	Caudovirales	Siphoviridae	Lillamyvirus	preVC_317	Clustered	VC_317_0	12	0.9955	1	5.74963	0.9955	1	1	1	1	1	1	3
Flavobacterium~phage~vB_FspS_mumin9-1	Heunggongvirae	Uroviricota	Caudoviricetes	Caudovirales	Siphoviridae	Muminvirus	preVC_317	Clustered	VC_317_0	12	0.9955	1	5.74963	0.9955	1	1	1	1	1	1	3
Flavobacterium~phage~vB_FspS_mymlan6-1	Heunggongvirae	Uroviricota	Caudoviricetes	Caudovirales	Siphoviridae	Muminvirus	preVC_317	Clustered	VC_317_0	12	0.9955	1	5.74963	0.9955	1	1	1	1	1	1	3
Flavobacterium~phage~vB_FspS_sniff9-1	Heunggongvirae	Uroviricota	Caudoviricetes	Caudovirales	Siphoviridae	Lillamyvirus	preVC_317	Clustered	VC_317_0	12	0.9955	1	5.74963	0.9955	1	1	1	1	1	1	3
Flavobacterium~phage~vB_FspS_snork6-1	Heunggongvirae	Uroviricota	Caudoviricetes	Caudovirales	Siphoviridae	Lillamyvirus	preVC_317	Clustered	VC_317_0	12	0.9955	1	5.74963	0.9955	1	1	1	1	1	1	3
Flavobacterium~phage~vB_FspS_snusmum6-1	Heunggongvirae	Uroviricota	Caudoviricetes	Caudovirales	Siphoviridae	Muminvirus	preVC_317	Clustered	VC_317_0	12	0.9955	1	5.74963	0.9955	1	1	1	1	1	1	3
Flavobacterium~phage~vB_FspS_stinky9-1	Heunggongvirae	Uroviricota	Caudoviricetes	Caudovirales	Siphoviridae	Lillamyvirus	preVC_317	Clustered	VC_317_0	12	0.9955	1	5.74963	0.9955	1	1	1	1	1	1	3
Flavobacterium~phage~vB_FspS_tant8-1	Heunggongvirae	Uroviricota	Caudoviricetes	Caudovirales	Siphoviridae	Tantvirus		Outlier
Flavobacterium~phage~vB_FspS_tooticki6-1	Heunggongvirae	Uroviricota	Caudoviricetes	Caudovirales	Siphoviridae	Muminvirus	preVC_317	Clustered	VC_317_0	12	0.9955	1	5.74963	0.9955	1	1	1	1	1	1	3
Fusobacterium~phage~Fnu1	Heunggongvirae	Uroviricota	Caudoviricetes	Caudovirales	Siphoviridae	Latrobevirus		Outlier
Geobacillus~phage~GBK2	Heunggongvirae	Uroviricota	Caudoviricetes	Caudovirales	Siphoviridae	Unassigned	preVC_247	Clustered	VC_247_0	3	0.3662	0.822222	8.06973	0.3011	1	1	1	1	1	2	2
Geobacillus~phage~GBSV1	Heunggongvirae	Uroviricota	Caudoviricetes	Caudovirales	Myoviridae	Svunavirus	preVC_135	Clustered	VC_135_0	2	0.4372	0.87789	4.12311	0.3838	1	1	1	1	1	1	1
Geobacillus~phage~TP-84	Heunggongvirae	Uroviricota	Caudoviricetes	Caudovirales	Siphoviridae	Saundersvirus	preVC_247	Clustered	VC_247_0	3	0.3662	0.822222	8.06973	0.3011	1	1	1	1	1	2	2
Geobacillus~virus~E2	Heunggongvirae	Uroviricota	Caudoviricetes	Caudovirales	Siphoviridae	Unassigned		Overlap (VC_86/VC_399)
Geobacillus~virus~E3	Heunggongvirae	Uroviricota	Caudoviricetes	Caudovirales	Siphoviridae	Unassigned	preVC_220	Clustered/Singleton	VC_220_4	1	0	0	0	0	1	1	1	1	1	1	0
Gordonia~Phage~Barsten	Heunggongvirae	Uroviricota	Caudoviricetes	Caudovirales	Siphoviridae	Vividuovirus	preVC_425	Clustered	VC_425_0	27	0.7589	1	5.5008	0.7589	1	1	1	1	1	1	1
Gordonia~Phage~Lollipop1437	Heunggongvirae	Uroviricota	Caudoviricetes	Caudovirales	Siphoviridae	Unassigned	preVC_352	Clustered	VC_352_0	41	0.969	1	6.89821	0.969	1	1	1	1	1	1	0
Gordonia~Phage~Sephiroth	Heunggongvirae	Uroviricota	Caudoviricetes	Caudovirales	Siphoviridae	Unassigned	preVC_428	Clustered	VC_428_1	4	0.4006	0.999966	4.723	0.4006	1	1	1	1	1	1	0
Gordonia~Phage~Zitch	Heunggongvirae	Uroviricota	Caudoviricetes	Caudovirales	Siphoviridae	Unassigned	preVC_424	Clustered	VC_424_1	3	0.0738	0.996767	4.47188	0.0736	1	1	1	1	1	1	0
Gordonia~phage~Adgers	Heunggongvirae	Uroviricota	Caudoviricetes	Caudovirales	Siphoviridae	Montyvirus	preVC_433	Clustered	VC_433_2	12	0.5471	1	4.38563	0.5471	1	1	1	1	1	1	2
Gordonia~phage~Ailee	Heunggongvirae	Uroviricota	Caudoviricetes	Caudovirales	Siphoviridae	Vividuovirus	preVC_425	Clustered	VC_425_0	27	0.7589	1	5.5008	0.7589	1	1	1	1	1	1	1
Gordonia~phage~Ali17	Heunggongvirae	Uroviricota	Caudoviricetes	Caudovirales	Siphoviridae	Unassigned		Overlap (VC_425/VC_426)
Gordonia~phage~Angelicage	Heunggongvirae	Uroviricota	Caudoviricetes	Caudovirales	Siphoviridae	Vividuovirus	preVC_425	Clustered	VC_425_0	27	0.7589	1	5.5008	0.7589	1	1	1	1	1	1	1
Gordonia~phage~Apricot	Heunggongvirae	Uroviricota	Caudoviricetes	Caudovirales	Siphoviridae	Apricotvirus	preVC_436	Clustered/Singleton	VC_436_1	1	0	0	0	0	1	1	1	1	1	1	1
Gordonia~phage~Archimedes	Heunggongvirae	Uroviricota	Caudoviricetes	Caudovirales	Siphoviridae	Ghobesvirus	preVC_158	Clustered	VC_158_0	2	0.0636	0.911534	4.24264	0.0579	1	1	1	1	1	1	1
Gordonia~phage~Arri	Heunggongvirae	Uroviricota	Caudoviricetes	Caudovirales	Siphoviridae	Wizardvirus	preVC_432	Clustered	VC_432_0	19	0.9186	1	5.23701	0.9186	1	1	1	1	1	1	1
Gordonia~phage~Asapag	Heunggongvirae	Uroviricota	Caudoviricetes	Caudovirales	Siphoviridae	Getalongvirus	preVC_436	Clustered	VC_436_0	6	0.4955	1	7.76876	0.4955	1	1	1	1	1	1	3
Gordonia~phage~Ashertheman	Heunggongvirae	Uroviricota	Caudoviricetes	Caudovirales	Siphoviridae	Vividuovirus	preVC_425	Clustered	VC_425_0	27	0.7589	1	5.5008	0.7589	1	1	1	1	1	1	1
Gordonia~phage~Attis	Heunggongvirae	Uroviricota	Caudoviricetes	Caudovirales	Siphoviridae	Attisvirus	preVC_437	Clustered	VC_437_0	2	0.1705	0.911991	0	0.1555	1	1	1	1	1	1	1
Gordonia~phage~Avazak	Heunggongvirae	Uroviricota	Caudoviricetes	Caudovirales	Siphoviridae	Tanisvirus	preVC_164	Clustered	VC_164_0	12	0.6462	1	6.25086	0.6462	0.8939	1	1	1	1	1	4
Gordonia~phage~Azula	Heunggongvirae	Uroviricota	Caudoviricetes	Caudovirales	Siphoviridae	Fairfaxidumvirus	preVC_347	Clustered	VC_347_0	16	0.8434	1	6.95604	0.8434	1	1	1	1	1	1	1
Gordonia~phage~BENtherdunthat	Heunggongvirae	Uroviricota	Caudoviricetes	Caudovirales	Siphoviridae	Getalongvirus	preVC_436	Clustered	VC_436_0	6	0.4955	1	7.76876	0.4955	1	1	1	1	1	1	3
Gordonia~phage~Bachita	Heunggongvirae	Uroviricota	Caudoviricetes	Caudovirales	Siphoviridae	Smoothievirus	preVC_429	Clustered	VC_429_0	4	0.3879	0.999803	4.40064	0.3879	1	1	1	1	1	1	1
Gordonia~phage~Bakery	Heunggongvirae	Uroviricota	Caudoviricetes	Caudovirales	Siphoviridae	Wizardvirus	preVC_432	Clustered	VC_432_0	19	0.9186	1	5.23701	0.9186	1	1	1	1	1	1	1
Gordonia~phage~Bantam	Heunggongvirae	Uroviricota	Caudoviricetes	Caudovirales	Siphoviridae	Bantamvirus	preVC_427	Clustered	VC_427_0	2	0.2002	0.891581	6.63325	0.1785	1	1	1	1	1	1	2
Gordonia~phage~Barb	Heunggongvirae	Uroviricota	Caudoviricetes	Caudovirales	Siphoviridae	Wizardvirus	preVC_432	Clustered	VC_432_0	19	0.9186	1	5.23701	0.9186	1	1	1	1	1	1	1
Gordonia~phage~BaxterFox	Heunggongvirae	Uroviricota	Caudoviricetes	Caudovirales	Siphoviridae	Baxtervirus	preVC_437	Clustered	VC_437_1	5	0.3578	1	7.47007	0.3578	0.9	1	1	1	1	1	2
Gordonia~phage~Beaver	Heunggongvirae	Uroviricota	Caudoviricetes	Caudovirales	Siphoviridae	Montyvirus	preVC_433	Clustered	VC_433_2	12	0.5471	1	4.38563	0.5471	1	1	1	1	1	1	2
Gordonia~phage~BetterKatz	Heunggongvirae	Uroviricota	Caudoviricetes	Caudovirales	Siphoviridae	Betterkatzvirus	preVC_440	Clustered	VC_440_0	3	0.1686	0.996783	7.1157	0.1681	1	1	1	1	1	1	2
Gordonia~phage~Bibwit	Heunggongvirae	Uroviricota	Caudoviricetes	Caudovirales	Siphoviridae	Vividuovirus	preVC_425	Clustered	VC_425_0	27	0.7589	1	5.5008	0.7589	1	1	1	1	1	1	1
Gordonia~phage~BirksAndSocks	Heunggongvirae	Uroviricota	Caudoviricetes	Caudovirales	Siphoviridae	Montyvirus	preVC_433	Clustered	VC_433_2	12	0.5471	1	4.38563	0.5471	1	1	1	1	1	1	2
Gordonia~phage~Bizzy	Heunggongvirae	Uroviricota	Caudoviricetes	Caudovirales	Siphoviridae	Vividuovirus	preVC_425	Clustered	VC_425_0	27	0.7589	1	5.5008	0.7589	1	1	1	1	1	1	1
Gordonia~phage~Blino	Heunggongvirae	Uroviricota	Caudoviricetes	Caudovirales	Siphoviridae	Fairfaxidumvirus	preVC_347	Clustered	VC_347_0	16	0.8434	1	6.95604	0.8434	1	1	1	1	1	1	1
Gordonia~phage~Blueberry	Heunggongvirae	Uroviricota	Caudoviricetes	Caudovirales	Siphoviridae	Fairfaxidumvirus	preVC_347	Clustered	VC_347_0	16	0.8434	1	6.95604	0.8434	1	1	1	1	1	1	1
Gordonia~phage~Bowser	Heunggongvirae	Uroviricota	Caudoviricetes	Caudovirales	Siphoviridae	Bowservirus	preVC_441	Clustered	VC_441_0	3	0.2237	0.996849	7.24663	0.223	1	1	1	1	1	1	3
Gordonia~phage~Brandonk123	Heunggongvirae	Uroviricota	Caudoviricetes	Caudovirales	Siphoviridae	Vividuovirus	preVC_425	Clustered	VC_425_0	27	0.7589	1	5.5008	0.7589	1	1	1	1	1	1	1
Gordonia~phage~BritBrat	Heunggongvirae	Uroviricota	Caudoviricetes	Caudovirales	Siphoviridae	Britbratvirus		Outlier
Gordonia~phage~BrutonGaster	Heunggongvirae	Uroviricota	Caudoviricetes	Caudovirales	Siphoviridae	Oneupvirus	preVC_429	Clustered	VC_429_1	2	0.1106	0.89251	6.40312	0.0987	1	1	1	1	1	1	1
Gordonia~phage~Buggaboo	Heunggongvirae	Uroviricota	Caudoviricetes	Caudovirales	Siphoviridae	Unassigned	preVC_352	Clustered	VC_352_0	41	0.969	1	6.89821	0.969	1	1	1	1	1	1	0
Gordonia~phage~CaptainKirk2	Heunggongvirae	Uroviricota	Caudoviricetes	Caudovirales	Siphoviridae	Fairfaxidumvirus	preVC_347	Clustered	VC_347_0	16	0.8434	1	6.95604	0.8434	1	1	1	1	1	1	1
Gordonia~phage~CarolAnn	Heunggongvirae	Uroviricota	Caudoviricetes	Caudovirales	Siphoviridae	Fairfaxidumvirus	preVC_347	Clustered	VC_347_0	16	0.8434	1	6.95604	0.8434	1	1	1	1	1	1	1
Gordonia~phage~Catfish	Heunggongvirae	Uroviricota	Caudoviricetes	Caudovirales	Siphoviridae	Vendettavirus	preVC_149	Clustered	VC_149_0	8	0.9387	1	5.51242	0.9387	1	1	1	1	1	1	2
Gordonia~phage~Chelms	Heunggongvirae	Uroviricota	Caudoviricetes	Caudovirales	Siphoviridae	Montyvirus	preVC_433	Clustered	VC_433_2	12	0.5471	1	4.38563	0.5471	1	1	1	1	1	1	2
Gordonia~phage~Chikenjars	Heunggongvirae	Uroviricota	Caudoviricetes	Caudovirales	Siphoviridae	Kenoshavirus	preVC_164	Clustered	VC_164_0	12	0.6462	1	6.25086	0.6462	0.8939	1	1	1	1	1	4
Gordonia~phage~Clown	Heunggongvirae	Uroviricota	Caudoviricetes	Caudovirales	Siphoviridae	Wizardvirus		Outlier
Gordonia~phage~ClubL	Heunggongvirae	Uroviricota	Caudoviricetes	Caudovirales	Siphoviridae	Smoothievirus	preVC_429	Clustered	VC_429_0	4	0.3879	0.999803	4.40064	0.3879	1	1	1	1	1	1	1
Gordonia~phage~Cozz	Heunggongvirae	Uroviricota	Caudoviricetes	Caudovirales	Siphoviridae	Emalynvirus	preVC_438	Clustered	VC_438_0	4	0.6943	1	4.4536	0.6943	1	1	1	1	1	1	1
Gordonia~phage~Crocheter	Heunggongvirae	Uroviricota	Caudoviricetes	Caudovirales	Siphoviridae	Kenoshavirus	preVC_164	Clustered	VC_164_0	12	0.6462	1	6.25086	0.6462	0.8939	1	1	1	1	1	4
Gordonia~phage~Cucurbita	Heunggongvirae	Uroviricota	Caudoviricetes	Caudovirales	Siphoviridae	Smoothievirus	preVC_429	Clustered	VC_429_0	4	0.3879	0.999803	4.40064	0.3879	1	1	1	1	1	1	1
Gordonia~phage~Danyall	Heunggongvirae	Uroviricota	Caudoviricetes	Caudovirales	Siphoviridae	Wizardvirus	preVC_432	Clustered	VC_432_0	19	0.9186	1	5.23701	0.9186	1	1	1	1	1	1	1
Gordonia~phage~Dardanus	Heunggongvirae	Uroviricota	Caudoviricetes	Caudovirales	Siphoviridae	Vendettavirus	preVC_149	Clustered	VC_149_0	8	0.9387	1	5.51242	0.9387	1	1	1	1	1	1	2
Gordonia~phage~Daredevil	Heunggongvirae	Uroviricota	Caudoviricetes	Caudovirales	Siphoviridae	Daredevilvirus	preVC_427	Clustered	VC_427_0	2	0.2002	0.891581	6.63325	0.1785	1	1	1	1	1	1	2
Gordonia~phage~Demosthenes	Heunggongvirae	Uroviricota	Caudoviricetes	Caudovirales	Siphoviridae	Demosthenesvirus		Overlap (VC_434/VC_435)
Gordonia~phage~Dexdert	Heunggongvirae	Uroviricota	Caudoviricetes	Caudovirales	Siphoviridae	Unassigned	preVC_424	Clustered	VC_424_0	3	0.0816	0.996697	3.90344	0.0813	1	1	1	1	1	1	0
Gordonia~phage~Duffington	Heunggongvirae	Uroviricota	Caudoviricetes	Caudovirales	Siphoviridae	Kenoshavirus	preVC_164	Clustered	VC_164_0	12	0.6462	1	6.25086	0.6462	0.8939	1	1	1	1	1	4
Gordonia~phage~DumpsterDude	Heunggongvirae	Uroviricota	Caudoviricetes	Caudovirales	Siphoviridae	Ruthyvirus	preVC_440	Clustered	VC_440_0	3	0.1686	0.996783	7.1157	0.1681	1	1	1	1	1	1	2
Gordonia~phage~EMoore	Heunggongvirae	Uroviricota	Caudoviricetes	Caudovirales	Siphoviridae	Unassigned		Overlap (VC_425/VC_426)
Gordonia~phage~Emalyn	Heunggongvirae	Uroviricota	Caudoviricetes	Caudovirales	Siphoviridae	Emalynvirus	preVC_438	Clustered	VC_438_0	4	0.6943	1	4.4536	0.6943	1	1	1	1	1	1	1
Gordonia~phage~Emianna	Heunggongvirae	Uroviricota	Caudoviricetes	Caudovirales	Siphoviridae	Unassigned	preVC_352	Clustered	VC_352_0	41	0.969	1	6.89821	0.969	1	1	1	1	1	1	0
Gordonia~phage~Evamon	Heunggongvirae	Uroviricota	Caudoviricetes	Caudovirales	Siphoviridae	Wizardvirus	preVC_432	Clustered	VC_432_0	19	0.9186	1	5.23701	0.9186	1	1	1	1	1	1	1
Gordonia~phage~Eyre	Heunggongvirae	Uroviricota	Caudoviricetes	Caudovirales	Siphoviridae	Eyrevirus		Outlier
Gordonia~phage~Fairfaxidum	Heunggongvirae	Uroviricota	Caudoviricetes	Caudovirales	Siphoviridae	Fairfaxidumvirus	preVC_347	Clustered	VC_347_0	16	0.8434	1	6.95604	0.8434	1	1	1	1	1	1	1
Gordonia~phage~Fireball	Heunggongvirae	Uroviricota	Caudoviricetes	Caudovirales	Siphoviridae	Wizardvirus	preVC_432	Clustered	VC_432_0	19	0.9186	1	5.23701	0.9186	1	1	1	1	1	1	1
Gordonia~phage~Flakey	Heunggongvirae	Uroviricota	Caudoviricetes	Caudovirales	Siphoviridae	Montyvirus	preVC_433	Clustered	VC_433_2	12	0.5471	1	4.38563	0.5471	1	1	1	1	1	1	2
Gordonia~phage~Flapper	Heunggongvirae	Uroviricota	Caudoviricetes	Caudovirales	Siphoviridae	Unassigned	preVC_352	Clustered	VC_352_0	41	0.969	1	6.89821	0.969	1	1	1	1	1	1	0
Gordonia~phage~Fosterous	Heunggongvirae	Uroviricota	Caudoviricetes	Caudovirales	Siphoviridae	Vividuovirus	preVC_425	Clustered	VC_425_0	27	0.7589	1	5.5008	0.7589	1	1	1	1	1	1	1
Gordonia~phage~Foxboro	Heunggongvirae	Uroviricota	Caudoviricetes	Caudovirales	Siphoviridae	Unassigned	preVC_352	Clustered	VC_352_0	41	0.969	1	6.89821	0.969	1	1	1	1	1	1	0
Gordonia~phage~Frokostdame	Heunggongvirae	Uroviricota	Caudoviricetes	Caudovirales	Siphoviridae	Fairfaxidumvirus	preVC_347	Clustered	VC_347_0	16	0.8434	1	6.95604	0.8434	1	1	1	1	1	1	1
Gordonia~phage~Fryberger	Heunggongvirae	Uroviricota	Caudoviricetes	Caudovirales	Siphoviridae	Ronaldovirus	preVC_452	Clustered	VC_452_0	2	0.9759	0.5	2.44949	0.4879	1	1	1	1	1	1	1
Gordonia~phage~GAL1	Heunggongvirae	Uroviricota	Caudoviricetes	Caudovirales	Siphoviridae	Galunavirus		Outlier
Gordonia~phage~GMA1	Heunggongvirae	Uroviricota	Caudoviricetes	Caudovirales	Siphoviridae	Unassigned		Overlap (VC_157/VC_204)
Gordonia~phage~GMA3	Heunggongvirae	Uroviricota	Caudoviricetes	Caudovirales	Siphoviridae	Gamtrevirus		Overlap (VC_435/VC_436)
Gordonia~phage~GMA4	Heunggongvirae	Uroviricota	Caudoviricetes	Caudovirales	Siphoviridae	Unassigned		Outlier
Gordonia~phage~GMA6	Heunggongvirae	Uroviricota	Caudoviricetes	Caudovirales	Myoviridae	Bendigovirus		Outlier
Gordonia~phage~GMA7	Heunggongvirae	Uroviricota	Caudoviricetes	Caudovirales	Siphoviridae	Getseptimavirus	preVC_433	Clustered	VC_433_1	2	0.0546	0.904082	1.41421	0.0493	1	1	1	1	1	1	1
Gordonia~phage~GRU1	Heunggongvirae	Uroviricota	Caudoviricetes	Caudovirales	Siphoviridae	Unassigned	preVC_352	Clustered	VC_352_0	41	0.969	1	6.89821	0.969	1	1	1	1	1	1	0
Gordonia~phage~GTE2	Heunggongvirae	Uroviricota	Caudoviricetes	Caudovirales	Siphoviridae	Emalynvirus	preVC_438	Clustered	VC_438_0	4	0.6943	1	4.4536	0.6943	1	1	1	1	1	1	1
Gordonia~phage~GTE5	Heunggongvirae	Uroviricota	Caudoviricetes	Caudovirales	Siphoviridae	Unassigned	preVC_352	Clustered	VC_352_0	41	0.969	1	6.89821	0.969	1	1	1	1	1	1	0
Gordonia~phage~GTE6	Heunggongvirae	Uroviricota	Caudoviricetes	Caudovirales	Siphoviridae	Unassigned	preVC_424	Clustered	VC_424_0	3	0.0816	0.996697	3.90344	0.0813	1	1	1	1	1	1	0
Gordonia~phage~GTE7	Heunggongvirae	Uroviricota	Caudoviricetes	Caudovirales	Siphoviridae	Getseptimavirus	preVC_433	Clustered	VC_433_1	2	0.0546	0.904082	1.41421	0.0493	1	1	1	1	1	1	1
Gordonia~phage~GTE8	Heunggongvirae	Uroviricota	Caudoviricetes	Caudovirales	Siphoviridae	Unassigned	preVC_352	Clustered	VC_352_0	41	0.969	1	6.89821	0.969	1	1	1	1	1	1	0
Gordonia~phage~Gaea	Heunggongvirae	Uroviricota	Caudoviricetes	Caudovirales	Siphoviridae	Vividuovirus	preVC_425	Clustered	VC_425_0	27	0.7589	1	5.5008	0.7589	1	1	1	1	1	1	1
Gordonia~phage~Galadriel	Heunggongvirae	Uroviricota	Caudoviricetes	Caudovirales	Siphoviridae	Vividuovirus	preVC_425	Clustered	VC_425_0	27	0.7589	1	5.5008	0.7589	1	1	1	1	1	1	1
Gordonia~phage~Geodirt	Heunggongvirae	Uroviricota	Caudoviricetes	Caudovirales	Siphoviridae	Vividuovirus	preVC_425	Clustered	VC_425_0	27	0.7589	1	5.5008	0.7589	1	1	1	1	1	1	1
Gordonia~phage~Getalong	Heunggongvirae	Uroviricota	Caudoviricetes	Caudovirales	Siphoviridae	Getalongvirus	preVC_436	Clustered	VC_436_0	6	0.4955	1	7.76876	0.4955	1	1	1	1	1	1	3
Gordonia~phage~Ghobes	Heunggongvirae	Uroviricota	Caudoviricetes	Caudovirales	Siphoviridae	Ghobesvirus	preVC_158	Clustered	VC_158_0	2	0.0636	0.911534	4.24264	0.0579	1	1	1	1	1	1	1
Gordonia~phage~Gibbin	Heunggongvirae	Uroviricota	Caudoviricetes	Caudovirales	Siphoviridae	Lambovirus	preVC_450	Clustered	VC_450_0	5	0.487	1	3.24293	0.487	1	1	1	1	1	1	1
Gordonia~phage~Gmala1	Heunggongvirae	Uroviricota	Caudoviricetes	Caudovirales	Siphoviridae	Gordtnkvirus		Overlap (VC_435/VC_436)
Gordonia~phage~GodonK	Heunggongvirae	Uroviricota	Caudoviricetes	Caudovirales	Siphoviridae	Godonkavirus		Outlier
Gordonia~phage~GordDuk1	Heunggongvirae	Uroviricota	Caudoviricetes	Caudovirales	Siphoviridae	Gordtnkvirus		Overlap (VC_435/VC_436)
Gordonia~phage~GordTnk2	Heunggongvirae	Uroviricota	Caudoviricetes	Caudovirales	Siphoviridae	Gordtnkvirus		Overlap (VC_435/VC_436)
Gordonia~phage~Gsput1	Heunggongvirae	Uroviricota	Caudoviricetes	Caudovirales	Siphoviridae	Gesputvirus	preVC_149	Clustered	VC_149_0	8	0.9387	1	5.51242	0.9387	1	1	1	1	1	1	2
Gordonia~phage~Guacamole	Heunggongvirae	Uroviricota	Caudoviricetes	Caudovirales	Siphoviridae	Fairfaxidumvirus	preVC_347	Clustered	VC_347_0	16	0.8434	1	6.95604	0.8434	1	1	1	1	1	1	1
Gordonia~phage~Gustav	Heunggongvirae	Uroviricota	Caudoviricetes	Caudovirales	Siphoviridae	Gustavvirus	preVC_349	Clustered	VC_349_0	3	0.4939	0.996612	5.46791	0.4923	1	1	1	1	1	1	2
Gordonia~phage~Hedwig	Heunggongvirae	Uroviricota	Caudoviricetes	Caudovirales	Siphoviridae	Hedwigvirus	preVC_441	Clustered	VC_441_0	3	0.2237	0.996849	7.24663	0.223	1	1	1	1	1	1	3
Gordonia~phage~Horus	Heunggongvirae	Uroviricota	Caudoviricetes	Caudovirales	Siphoviridae	Horusvirus	preVC_436	Clustered	VC_436_0	6	0.4955	1	7.76876	0.4955	1	1	1	1	1	1	3
Gordonia~phage~Hotorobo	Heunggongvirae	Uroviricota	Caudoviricetes	Caudovirales	Siphoviridae	Montyvirus	preVC_433	Clustered	VC_433_2	12	0.5471	1	4.38563	0.5471	1	1	1	1	1	1	2
Gordonia~phage~IDyn	Heunggongvirae	Uroviricota	Caudoviricetes	Caudovirales	Siphoviridae	Unassigned	preVC_352	Clustered	VC_352_0	41	0.969	1	6.89821	0.969	1	1	1	1	1	1	0
Gordonia~phage~JKSyngboy	Heunggongvirae	Uroviricota	Caudoviricetes	Caudovirales	Siphoviridae	Vividuovirus	preVC_425	Clustered	VC_425_0	27	0.7589	1	5.5008	0.7589	1	1	1	1	1	1	1
Gordonia~phage~JSwag	Heunggongvirae	Uroviricota	Caudoviricetes	Caudovirales	Siphoviridae	Soupsvirus	preVC_447	Clustered	VC_447_0	7	0.2341	1	3.60351	0.2341	1	1	1	1	1	1	1
Gordonia~phage~Jabberwocky	Heunggongvirae	Uroviricota	Caudoviricetes	Caudovirales	Siphoviridae	Vividuovirus	preVC_425	Clustered	VC_425_0	27	0.7589	1	5.5008	0.7589	1	1	1	1	1	1	1
Gordonia~phage~Jace	Heunggongvirae	Uroviricota	Caudoviricetes	Caudovirales	Siphoviridae	Jacevirus		Overlap (VC_157/VC_204)
Gordonia~phage~Jambalaya	Heunggongvirae	Uroviricota	Caudoviricetes	Caudovirales	Siphoviridae	Wizardvirus	preVC_432	Clustered	VC_432_0	19	0.9186	1	5.23701	0.9186	1	1	1	1	1	1	1
Gordonia~phage~Jellybones	Heunggongvirae	Uroviricota	Caudoviricetes	Caudovirales	Siphoviridae	Montyvirus	preVC_433	Clustered	VC_433_2	12	0.5471	1	4.38563	0.5471	1	1	1	1	1	1	2
Gordonia~phage~John316	Heunggongvirae	Uroviricota	Caudoviricetes	Caudovirales	Siphoviridae	Montyvirus	preVC_433	Clustered	VC_433_2	12	0.5471	1	4.38563	0.5471	1	1	1	1	1	1	2
Gordonia~phage~JuJu	Heunggongvirae	Uroviricota	Caudoviricetes	Caudovirales	Siphoviridae	Fairfaxidumvirus	preVC_347	Clustered	VC_347_0	16	0.8434	1	6.95604	0.8434	1	1	1	1	1	1	1
Gordonia~phage~Jumbo	Heunggongvirae	Uroviricota	Caudoviricetes	Caudovirales	Siphoviridae	Gorjumvirus		Overlap (VC_435/VC_436)
Gordonia~phage~Kabluna	Heunggongvirae	Uroviricota	Caudoviricetes	Caudovirales	Siphoviridae	Unassigned	preVC_352	Clustered	VC_352_0	41	0.969	1	6.89821	0.969	1	1	1	1	1	1	0
Gordonia~phage~KatherineG	Heunggongvirae	Uroviricota	Caudoviricetes	Caudovirales	Siphoviridae	Soupsvirus	preVC_447	Clustered	VC_447_0	7	0.2341	1	3.60351	0.2341	1	1	1	1	1	1	1
Gordonia~phage~Katyusha	Heunggongvirae	Uroviricota	Caudoviricetes	Caudovirales	Siphoviridae	Demosthenesvirus		Overlap (VC_434/VC_435)
Gordonia~phage~Keitabear	Heunggongvirae	Uroviricota	Caudoviricetes	Caudovirales	Siphoviridae	Vividuovirus	preVC_425	Clustered	VC_425_0	27	0.7589	1	5.5008	0.7589	1	1	1	1	1	1	1
Gordonia~phage~Kenna	Heunggongvirae	Uroviricota	Caudoviricetes	Caudovirales	Siphoviridae	Getalongvirus	preVC_436	Clustered	VC_436_0	6	0.4955	1	7.76876	0.4955	1	1	1	1	1	1	3
Gordonia~phage~Kenosha	Heunggongvirae	Uroviricota	Caudoviricetes	Caudovirales	Siphoviridae	Kenoshavirus	preVC_164	Clustered	VC_164_0	12	0.6462	1	6.25086	0.6462	0.8939	1	1	1	1	1	4
Gordonia~phage~KidneyBean	Heunggongvirae	Uroviricota	Caudoviricetes	Caudovirales	Siphoviridae	Unassigned	preVC_352	Clustered	VC_352_0	41	0.969	1	6.89821	0.969	1	1	1	1	1	1	0
Gordonia~phage~KimmyK	Heunggongvirae	Uroviricota	Caudoviricetes	Caudovirales	Siphoviridae	Wizardvirus	preVC_432	Clustered	VC_432_0	19	0.9186	1	5.23701	0.9186	1	1	1	1	1	1	1
Gordonia~phage~Kita	Heunggongvirae	Uroviricota	Caudoviricetes	Caudovirales	Siphoviridae	Nymphadoravirus	preVC_437	Clustered	VC_437_1	5	0.3578	1	7.47007	0.3578	0.9	1	1	1	1	1	2
Gordonia~phage~Kroos	Heunggongvirae	Uroviricota	Caudoviricetes	Caudovirales	Siphoviridae	Vividuovirus	preVC_425	Clustered	VC_425_0	27	0.7589	1	5.5008	0.7589	1	1	1	1	1	1	1
Gordonia~phage~Kudefre	Heunggongvirae	Uroviricota	Caudoviricetes	Caudovirales	Siphoviridae	Unassigned	preVC_428	Clustered	VC_428_1	4	0.4006	0.999966	4.723	0.4006	1	1	1	1	1	1	0
Gordonia~phage~Kvothe	Heunggongvirae	Uroviricota	Caudoviricetes	Caudovirales	Siphoviridae	Demosthenesvirus		Overlap (VC_434/VC_435)
Gordonia~phage~Lambo	Heunggongvirae	Uroviricota	Caudoviricetes	Caudovirales	Siphoviridae	Lambovirus	preVC_450	Clustered	VC_450_0	5	0.487	1	3.24293	0.487	1	1	1	1	1	1	1
Gordonia~phage~Lennon	Heunggongvirae	Uroviricota	Caudoviricetes	Caudovirales	Siphoviridae	Vividuovirus	preVC_425	Clustered	VC_425_0	27	0.7589	1	5.5008	0.7589	1	1	1	1	1	1	1
Gordonia~phage~Leonard	Heunggongvirae	Uroviricota	Caudoviricetes	Caudovirales	Siphoviridae	Unassigned		Overlap (VC_425/VC_426)
Gordonia~phage~Lilbeanie	Heunggongvirae	Uroviricota	Caudoviricetes	Caudovirales	Siphoviridae	Unassigned		Outlier
Gordonia~phage~Love	Heunggongvirae	Uroviricota	Caudoviricetes	Caudovirales	Siphoviridae	Vividuovirus	preVC_425	Clustered	VC_425_0	27	0.7589	1	5.5008	0.7589	1	1	1	1	1	1	1
Gordonia~phage~Lucky10	Heunggongvirae	Uroviricota	Caudoviricetes	Caudovirales	Siphoviridae	Luckytenvirus		Outlier
Gordonia~phage~Mahdia	Heunggongvirae	Uroviricota	Caudoviricetes	Caudovirales	Siphoviridae	Gustavvirus	preVC_349	Clustered	VC_349_0	3	0.4939	0.996612	5.46791	0.4923	1	1	1	1	1	1	2
Gordonia~phage~Marietta	Heunggongvirae	Uroviricota	Caudoviricetes	Caudovirales	Siphoviridae	Unassigned	preVC_352	Clustered	VC_352_0	41	0.969	1	6.89821	0.969	1	1	1	1	1	1	0
Gordonia~phage~MelBins	Heunggongvirae	Uroviricota	Caudoviricetes	Caudovirales	Siphoviridae	Unassigned		Overlap (VC_425/VC_426)
Gordonia~phage~Monty	Heunggongvirae	Uroviricota	Caudoviricetes	Caudovirales	Siphoviridae	Montyvirus	preVC_433	Clustered	VC_433_2	12	0.5471	1	4.38563	0.5471	1	1	1	1	1	1	2
Gordonia~phage~Mutzi	Heunggongvirae	Uroviricota	Caudoviricetes	Caudovirales	Siphoviridae	Wizardvirus	preVC_432	Clustered	VC_432_0	19	0.9186	1	5.23701	0.9186	1	1	1	1	1	1	1
Gordonia~phage~NadineRae	Heunggongvirae	Uroviricota	Caudoviricetes	Caudovirales	Siphoviridae	Unassigned	preVC_352	Clustered	VC_352_0	41	0.969	1	6.89821	0.969	1	1	1	1	1	1	0
Gordonia~phage~NatB6	Heunggongvirae	Uroviricota	Caudoviricetes	Caudovirales	Siphoviridae	Unassigned	preVC_352	Clustered	VC_352_0	41	0.969	1	6.89821	0.969	1	1	1	1	1	1	0
Gordonia~phage~Neville	Heunggongvirae	Uroviricota	Caudoviricetes	Caudovirales	Siphoviridae	Unassigned	preVC_428	Clustered	VC_428_0	3	0.2891	0.996711	4.85875	0.2881	1	1	1	1	1	1	0
Gordonia~phage~Nordenberg	Heunggongvirae	Uroviricota	Caudoviricetes	Caudovirales	Siphoviridae	Vividuovirus	preVC_425	Clustered	VC_425_0	27	0.7589	1	5.5008	0.7589	1	1	1	1	1	1	1
Gordonia~phage~NosilaM	Heunggongvirae	Uroviricota	Caudoviricetes	Caudovirales	Siphoviridae	Unassigned	preVC_352	Clustered	VC_352_0	41	0.969	1	6.89821	0.969	1	1	1	1	1	1	0
Gordonia~phage~Nubi	Heunggongvirae	Uroviricota	Caudoviricetes	Caudovirales	Siphoviridae	Wizardvirus	preVC_432	Clustered	VC_432_0	19	0.9186	1	5.23701	0.9186	1	1	1	1	1	1	1
Gordonia~phage~Nyceirae	Heunggongvirae	Uroviricota	Caudoviricetes	Caudovirales	Siphoviridae	Nyceiraevirus		Outlier
Gordonia~phage~Nymphadora	Heunggongvirae	Uroviricota	Caudoviricetes	Caudovirales	Siphoviridae	Nymphadoravirus	preVC_437	Clustered	VC_437_1	5	0.3578	1	7.47007	0.3578	0.9	1	1	1	1	1	2
Gordonia~phage~Obliviate	Heunggongvirae	Uroviricota	Caudoviricetes	Caudovirales	Siphoviridae	Fairfaxidumvirus	preVC_347	Clustered	VC_347_0	16	0.8434	1	6.95604	0.8434	1	1	1	1	1	1	1
Gordonia~phage~Octobien14	Heunggongvirae	Uroviricota	Caudoviricetes	Caudovirales	Siphoviridae	Unassigned	preVC_428	Clustered	VC_428_1	4	0.4006	0.999966	4.723	0.4006	1	1	1	1	1	1	0
Gordonia~phage~OhMyWard	Heunggongvirae	Uroviricota	Caudoviricetes	Caudovirales	Siphoviridae	Kenoshavirus	preVC_164	Clustered	VC_164_0	12	0.6462	1	6.25086	0.6462	0.8939	1	1	1	1	1	4
Gordonia~phage~OneUp	Heunggongvirae	Uroviricota	Caudoviricetes	Caudovirales	Siphoviridae	Oneupvirus	preVC_429	Clustered	VC_429_1	2	0.1106	0.89251	6.40312	0.0987	1	1	1	1	1	1	1
Gordonia~phage~Orchid	Heunggongvirae	Uroviricota	Caudoviricetes	Caudovirales	Siphoviridae	Orchidvirus		Outlier
Gordonia~phage~Paries	Heunggongvirae	Uroviricota	Caudoviricetes	Caudovirales	Siphoviridae	Vividuovirus	preVC_425	Clustered	VC_425_0	27	0.7589	1	5.5008	0.7589	1	1	1	1	1	1	1
Gordonia~phage~Patio	Heunggongvirae	Uroviricota	Caudoviricetes	Caudovirales	Siphoviridae	Unassigned	preVC_352	Clustered	VC_352_0	41	0.969	1	6.89821	0.969	1	1	1	1	1	1	0
Gordonia~phage~Petra	Heunggongvirae	Uroviricota	Caudoviricetes	Caudovirales	Siphoviridae	Fairfaxidumvirus	preVC_347	Clustered	VC_347_0	16	0.8434	1	6.95604	0.8434	1	1	1	1	1	1	1
Gordonia~phage~Phinally	Heunggongvirae	Uroviricota	Caudoviricetes	Caudovirales	Siphoviridae	Unassigned		Overlap (VC_425/VC_426)
Gordonia~phage~Phistory	Heunggongvirae	Uroviricota	Caudoviricetes	Caudovirales	Siphoviridae	Phistoryvirus	preVC_436	Clustered	VC_436_0	6	0.4955	1	7.76876	0.4955	1	1	1	1	1	1	3
Gordonia~phage~Phlop	Heunggongvirae	Uroviricota	Caudoviricetes	Caudovirales	Siphoviridae	Wizardvirus	preVC_432	Clustered	VC_432_0	19	0.9186	1	5.23701	0.9186	1	1	1	1	1	1	1
Gordonia~phage~Pleakley	Heunggongvirae	Uroviricota	Caudoviricetes	Caudovirales	Siphoviridae	Unassigned	preVC_352	Clustered	VC_352_0	41	0.969	1	6.89821	0.969	1	1	1	1	1	1	0
Gordonia~phage~Portcullis	Heunggongvirae	Uroviricota	Caudoviricetes	Caudovirales	Siphoviridae	Wizardvirus	preVC_432	Clustered	VC_432_0	19	0.9186	1	5.23701	0.9186	1	1	1	1	1	1	1
Gordonia~phage~Pupper	Heunggongvirae	Uroviricota	Caudoviricetes	Caudovirales	Myoviridae	Unassigned	preVC_426	Clustered	VC_426_1	2	0.0421	0.910628	7.14143	0.0383	1	1	1	1	1	1	0
Gordonia~phage~Rabbitrun	Heunggongvirae	Uroviricota	Caudoviricetes	Caudovirales	Siphoviridae	Unassigned	preVC_428	Clustered	VC_428_0	3	0.2891	0.996711	4.85875	0.2881	1	1	1	1	1	1	0
Gordonia~phage~Ranch	Heunggongvirae	Uroviricota	Caudoviricetes	Caudovirales	Siphoviridae	Lambovirus	preVC_450	Clustered	VC_450_0	5	0.487	1	3.24293	0.487	1	1	1	1	1	1	1
Gordonia~phage~Remus	Heunggongvirae	Uroviricota	Caudoviricetes	Caudovirales	Siphoviridae	Soupsvirus	preVC_447	Clustered	VC_447_0	7	0.2341	1	3.60351	0.2341	1	1	1	1	1	1	1
Gordonia~phage~Ribeye	Heunggongvirae	Uroviricota	Caudoviricetes	Caudovirales	Siphoviridae	Vividuovirus	preVC_425	Clustered	VC_425_0	27	0.7589	1	5.5008	0.7589	1	1	1	1	1	1	1
Gordonia~phage~Rickmore	Heunggongvirae	Uroviricota	Caudoviricetes	Caudovirales	Siphoviridae	Kenoshavirus	preVC_164	Clustered	VC_164_0	12	0.6462	1	6.25086	0.6462	0.8939	1	1	1	1	1	4
Gordonia~phage~Rofo	Heunggongvirae	Uroviricota	Caudoviricetes	Caudovirales	Siphoviridae	Vividuovirus	preVC_425	Clustered	VC_425_0	27	0.7589	1	5.5008	0.7589	1	1	1	1	1	1	1
Gordonia~phage~RogerDodger	Heunggongvirae	Uroviricota	Caudoviricetes	Caudovirales	Siphoviridae	Wizardvirus	preVC_432	Clustered	VC_432_0	19	0.9186	1	5.23701	0.9186	1	1	1	1	1	1	1
Gordonia~phage~Ronaldo	Heunggongvirae	Uroviricota	Caudoviricetes	Caudovirales	Siphoviridae	Ronaldovirus	preVC_452	Clustered	VC_452_0	2	0.9759	0.5	2.44949	0.4879	1	1	1	1	1	1	1
Gordonia~phage~Rosalind	Heunggongvirae	Uroviricota	Caudoviricetes	Caudovirales	Siphoviridae	Soupsvirus	preVC_447	Clustered	VC_447_0	7	0.2341	1	3.60351	0.2341	1	1	1	1	1	1	1
Gordonia~phage~Ruthy	Heunggongvirae	Uroviricota	Caudoviricetes	Caudovirales	Siphoviridae	Ruthyvirus	preVC_440	Clustered	VC_440_0	3	0.1686	0.996783	7.1157	0.1681	1	1	1	1	1	1	2
Gordonia~phage~Sadboi	Heunggongvirae	Uroviricota	Caudoviricetes	Caudovirales	Siphoviridae	Lambovirus	preVC_450	Clustered	VC_450_0	5	0.487	1	3.24293	0.487	1	1	1	1	1	1	1
Gordonia~phage~Schmidt	Heunggongvirae	Uroviricota	Caudoviricetes	Caudovirales	Siphoviridae	Vendettavirus	preVC_149	Clustered	VC_149_0	8	0.9387	1	5.51242	0.9387	1	1	1	1	1	1	2
Gordonia~phage~Schnabeltier	Heunggongvirae	Uroviricota	Caudoviricetes	Caudovirales	Siphoviridae	Schnabeltiervirus	preVC_441	Clustered	VC_441_0	3	0.2237	0.996849	7.24663	0.223	1	1	1	1	1	1	3
Gordonia~phage~Secretariat	Heunggongvirae	Uroviricota	Caudoviricetes	Caudovirales	Siphoviridae	Secretariatvirus	preVC_164	Clustered	VC_164_0	12	0.6462	1	6.25086	0.6462	0.8939	1	1	1	1	1	4
Gordonia~phage~Skog	Heunggongvirae	Uroviricota	Caudoviricetes	Caudovirales	Myoviridae	Unassigned	preVC_426	Clustered	VC_426_1	2	0.0421	0.910628	7.14143	0.0383	1	1	1	1	1	1	0
Gordonia~phage~Skysand	Heunggongvirae	Uroviricota	Caudoviricetes	Caudovirales	Siphoviridae	Unassigned	preVC_352	Clustered	VC_352_0	41	0.969	1	6.89821	0.969	1	1	1	1	1	1	0
Gordonia~phage~SmokingBunny	Heunggongvirae	Uroviricota	Caudoviricetes	Caudovirales	Siphoviridae	Wizardvirus	preVC_432	Clustered	VC_432_0	19	0.9186	1	5.23701	0.9186	1	1	1	1	1	1	1
Gordonia~phage~Smoothie	Heunggongvirae	Uroviricota	Caudoviricetes	Caudovirales	Siphoviridae	Smoothievirus	preVC_429	Clustered	VC_429_0	4	0.3879	0.999803	4.40064	0.3879	1	1	1	1	1	1	1
Gordonia~phage~SoilAssassin	Heunggongvirae	Uroviricota	Caudoviricetes	Caudovirales	Siphoviridae	Attisvirus	preVC_437	Clustered	VC_437_0	2	0.1705	0.911991	0	0.1555	1	1	1	1	1	1	1
Gordonia~phage~Sombrero	Heunggongvirae	Uroviricota	Caudoviricetes	Caudovirales	Siphoviridae	Montyvirus	preVC_433	Clustered	VC_433_2	12	0.5471	1	4.38563	0.5471	1	1	1	1	1	1	2
Gordonia~phage~Soups	Heunggongvirae	Uroviricota	Caudoviricetes	Caudovirales	Siphoviridae	Soupsvirus	preVC_447	Clustered	VC_447_0	7	0.2341	1	3.60351	0.2341	1	1	1	1	1	1	1
Gordonia~phage~Sour	Heunggongvirae	Uroviricota	Caudoviricetes	Caudovirales	Siphoviridae	Sourvirus	preVC_464	Clustered/Singleton	VC_464_3	1	0	0	0	0	1	1	1	1	1	1	1
Gordonia~phage~Splinter	Heunggongvirae	Uroviricota	Caudoviricetes	Caudovirales	Siphoviridae	Vendettavirus	preVC_149	Clustered	VC_149_0	8	0.9387	1	5.51242	0.9387	1	1	1	1	1	1	2
Gordonia~phage~SteveFrench	Heunggongvirae	Uroviricota	Caudoviricetes	Caudovirales	Siphoviridae	Montyvirus	preVC_433	Clustered	VC_433_2	12	0.5471	1	4.38563	0.5471	1	1	1	1	1	1	2
Gordonia~phage~Stormageddon	Heunggongvirae	Uroviricota	Caudoviricetes	Caudovirales	Myoviridae	Unassigned	preVC_426	Clustered/Singleton	VC_426_2	1	0	0	0	0	1	1	1	1	1	1	0
Gordonia~phage~Strosahl	Heunggongvirae	Uroviricota	Caudoviricetes	Caudovirales	Siphoviridae	Soupsvirus	preVC_447	Clustered	VC_447_0	7	0.2341	1	3.60351	0.2341	1	1	1	1	1	1	1
Gordonia~phage~Stultus	Heunggongvirae	Uroviricota	Caudoviricetes	Caudovirales	Siphoviridae	Vividuovirus	preVC_425	Clustered	VC_425_0	27	0.7589	1	5.5008	0.7589	1	1	1	1	1	1	1
Gordonia~phage~Sukkupi	Heunggongvirae	Uroviricota	Caudoviricetes	Caudovirales	Siphoviridae	Unassigned	preVC_352	Clustered	VC_352_0	41	0.969	1	6.89821	0.969	1	1	1	1	1	1	0
Gordonia~phage~Suzy	Heunggongvirae	Uroviricota	Caudoviricetes	Caudovirales	Siphoviridae	Terapinvirus	preVC_453	Clustered	VC_453_0	2	0.1664	0.902867	2.82843	0.1503	1	1	1	1	1	1	1
Gordonia~phage~Syleon	Heunggongvirae	Uroviricota	Caudoviricetes	Caudovirales	Siphoviridae	Unassigned	preVC_428	Clustered	VC_428_1	4	0.4006	0.999966	4.723	0.4006	1	1	1	1	1	1	0
Gordonia~phage~TZGordon	Heunggongvirae	Uroviricota	Caudoviricetes	Caudovirales	Siphoviridae	Vendettavirus	preVC_149	Clustered	VC_149_0	8	0.9387	1	5.51242	0.9387	1	1	1	1	1	1	2
Gordonia~phage~Tangent	Heunggongvirae	Uroviricota	Caudoviricetes	Caudovirales	Siphoviridae	Vividuovirus	preVC_425	Clustered	VC_425_0	27	0.7589	1	5.5008	0.7589	1	1	1	1	1	1	1
Gordonia~phage~Tangerine	Heunggongvirae	Uroviricota	Caudoviricetes	Caudovirales	Siphoviridae	Vividuovirus	preVC_425	Clustered	VC_425_0	27	0.7589	1	5.5008	0.7589	1	1	1	1	1	1	1
Gordonia~phage~Tanis	Heunggongvirae	Uroviricota	Caudoviricetes	Caudovirales	Siphoviridae	Tanisvirus	preVC_164	Clustered	VC_164_0	12	0.6462	1	6.25086	0.6462	0.8939	1	1	1	1	1	4
Gordonia~phage~Terapin	Heunggongvirae	Uroviricota	Caudoviricetes	Caudovirales	Siphoviridae	Terapinvirus	preVC_453	Clustered	VC_453_0	2	0.1664	0.902867	2.82843	0.1503	1	1	1	1	1	1	1
Gordonia~phage~Tiamoceli	Heunggongvirae	Uroviricota	Caudoviricetes	Caudovirales	Siphoviridae	Unassigned	preVC_424	Clustered	VC_424_0	3	0.0816	0.996697	3.90344	0.0813	1	1	1	1	1	1	0
Gordonia~phage~TillyBobJoe	Heunggongvirae	Uroviricota	Caudoviricetes	Caudovirales	Siphoviridae	Wizardvirus	preVC_432	Clustered	VC_432_0	19	0.9186	1	5.23701	0.9186	1	1	1	1	1	1	1
Gordonia~phage~TinaLin	Heunggongvirae	Uroviricota	Caudoviricetes	Caudovirales	Siphoviridae	Vendettavirus	preVC_149	Clustered	VC_149_0	8	0.9387	1	5.51242	0.9387	1	1	1	1	1	1	2
Gordonia~phage~Toast	Heunggongvirae	Uroviricota	Caudoviricetes	Caudovirales	Siphoviridae	Fairfaxidumvirus	preVC_347	Clustered	VC_347_0	16	0.8434	1	6.95604	0.8434	1	1	1	1	1	1	1
Gordonia~phage~Trax	Heunggongvirae	Uroviricota	Caudoviricetes	Caudovirales	Siphoviridae	Unassigned	preVC_428	Clustered	VC_428_0	3	0.2891	0.996711	4.85875	0.2881	1	1	1	1	1	1	0
Gordonia~phage~Trine	Heunggongvirae	Uroviricota	Caudoviricetes	Caudovirales	Siphoviridae	Trinevirus	preVC_349	Clustered	VC_349_0	3	0.4939	0.996612	5.46791	0.4923	1	1	1	1	1	1	2
Gordonia~phage~Troje	Heunggongvirae	Uroviricota	Caudoviricetes	Caudovirales	Siphoviridae	Emalynvirus	preVC_438	Clustered	VC_438_0	4	0.6943	1	4.4536	0.6943	1	1	1	1	1	1	1
Gordonia~phage~Turuncu	Heunggongvirae	Uroviricota	Caudoviricetes	Caudovirales	Siphoviridae	Unassigned	preVC_352	Clustered	VC_352_0	41	0.969	1	6.89821	0.969	1	1	1	1	1	1	0
Gordonia~phage~Twister6	Heunggongvirae	Uroviricota	Caudoviricetes	Caudovirales	Siphoviridae	Wizardvirus	preVC_432	Clustered	VC_432_0	19	0.9186	1	5.23701	0.9186	1	1	1	1	1	1	1
Gordonia~phage~UmaThurman	Heunggongvirae	Uroviricota	Caudoviricetes	Caudovirales	Siphoviridae	Fairfaxidumvirus	preVC_347	Clustered	VC_347_0	16	0.8434	1	6.95604	0.8434	1	1	1	1	1	1	1
Gordonia~phage~Untouchable	Heunggongvirae	Uroviricota	Caudoviricetes	Caudovirales	Siphoviridae	Kenoshavirus	preVC_164	Clustered	VC_164_0	12	0.6462	1	6.25086	0.6462	0.8939	1	1	1	1	1	4
Gordonia~phage~Utz	Heunggongvirae	Uroviricota	Caudoviricetes	Caudovirales	Siphoviridae	Fairfaxidumvirus	preVC_347	Clustered	VC_347_0	16	0.8434	1	6.95604	0.8434	1	1	1	1	1	1	1
Gordonia~phage~Valary	Heunggongvirae	Uroviricota	Caudoviricetes	Caudovirales	Siphoviridae	Wizardvirus	preVC_432	Clustered	VC_432_0	19	0.9186	1	5.23701	0.9186	1	1	1	1	1	1	1
Gordonia~phage~VanDeWege	Heunggongvirae	Uroviricota	Caudoviricetes	Caudovirales	Siphoviridae	Wizardvirus	preVC_432	Clustered	VC_432_0	19	0.9186	1	5.23701	0.9186	1	1	1	1	1	1	1
Gordonia~phage~Vendetta	Heunggongvirae	Uroviricota	Caudoviricetes	Caudovirales	Siphoviridae	Vendettavirus	preVC_149	Clustered	VC_149_0	8	0.9387	1	5.51242	0.9387	1	1	1	1	1	1	2
Gordonia~phage~Verity	Heunggongvirae	Uroviricota	Caudoviricetes	Caudovirales	Siphoviridae	Unassigned	preVC_424	Clustered	VC_424_1	3	0.0738	0.996767	4.47188	0.0736	1	1	1	1	1	1	0
Gordonia~phage~Vivi2	Heunggongvirae	Uroviricota	Caudoviricetes	Caudovirales	Siphoviridae	Vividuovirus	preVC_425	Clustered	VC_425_0	27	0.7589	1	5.5008	0.7589	1	1	1	1	1	1	1
Gordonia~phage~Waits	Heunggongvirae	Uroviricota	Caudoviricetes	Caudovirales	Siphoviridae	Soupsvirus	preVC_447	Clustered	VC_447_0	7	0.2341	1	3.60351	0.2341	1	1	1	1	1	1	1
Gordonia~phage~Walrus	Heunggongvirae	Uroviricota	Caudoviricetes	Caudovirales	Siphoviridae	Fairfaxidumvirus	preVC_347	Clustered	VC_347_0	16	0.8434	1	6.95604	0.8434	1	1	1	1	1	1	1
Gordonia~phage~William	Heunggongvirae	Uroviricota	Caudoviricetes	Caudovirales	Siphoviridae	Fairfaxidumvirus	preVC_347	Clustered	VC_347_0	16	0.8434	1	6.95604	0.8434	1	1	1	1	1	1	1
Gordonia~phage~Wizard	Heunggongvirae	Uroviricota	Caudoviricetes	Caudovirales	Siphoviridae	Wizardvirus	preVC_432	Clustered	VC_432_0	19	0.9186	1	5.23701	0.9186	1	1	1	1	1	1	1
Gordonia~phage~Woes	Heunggongvirae	Uroviricota	Caudoviricetes	Caudovirales	Siphoviridae	Woesvirus	preVC_433	Clustered	VC_433_2	12	0.5471	1	4.38563	0.5471	1	1	1	1	1	1	2
Gordonia~phage~Yeezy	Heunggongvirae	Uroviricota	Caudoviricetes	Caudovirales	Siphoviridae	Baxtervirus	preVC_437	Clustered	VC_437_1	5	0.3578	1	7.47007	0.3578	0.9	1	1	1	1	1	2
Gordonia~phage~Yikes	Heunggongvirae	Uroviricota	Caudoviricetes	Caudovirales	Siphoviridae	Lambovirus	preVC_450	Clustered	VC_450_0	5	0.487	1	3.24293	0.487	1	1	1	1	1	1	1
Gordonia~phage~YorkOnyx	Heunggongvirae	Uroviricota	Caudoviricetes	Caudovirales	Siphoviridae	Vividuovirus	preVC_425	Clustered	VC_425_0	27	0.7589	1	5.5008	0.7589	1	1	1	1	1	1	1
Gordonia~phage~Yvonnetastic	Heunggongvirae	Uroviricota	Caudoviricetes	Caudovirales	Siphoviridae	Yvonnevirus		Outlier
Gordonia~phage~Zipp	Heunggongvirae	Uroviricota	Caudoviricetes	Caudovirales	Siphoviridae	Unassigned	preVC_424	Clustered	VC_424_1	3	0.0738	0.996767	4.47188	0.0736	1	1	1	1	1	1	0
Gordonia~phage~Zirinka	Heunggongvirae	Uroviricota	Caudoviricetes	Caudovirales	Siphoviridae	Nymphadoravirus	preVC_437	Clustered	VC_437_1	5	0.3578	1	7.47007	0.3578	0.9	1	1	1	1	1	2
Gordonia~terrae~phage~McKinley	Heunggongvirae	Uroviricota	Caudoviricetes	Caudovirales	Siphoviridae	Vividuovirus	preVC_425	Clustered	VC_425_0	27	0.7589	1	5.5008	0.7589	1	1	1	1	1	1	1
Haemophilus~phage~Aaphi23	Heunggongvirae	Uroviricota	Caudoviricetes	Caudovirales	Myoviridae	Unassigned	preVC_126	Clustered	VC_126_0	2	0.4216	0.891494	4.3589	0.3758	1	1	1	1	1	1	0
Haemophilus~phage~SuMu	Heunggongvirae	Uroviricota	Caudoviricetes	Caudovirales	Myoviridae	Unassigned		Outlier
Haemophilus~virus~HP1	Heunggongvirae	Uroviricota	Caudoviricetes	Caudovirales	Myoviridae	Hpunavirus	preVC_125	Clustered	VC_125_0	20	0.9706	1	5.56846	0.9706	1	1	1	1	1	1	12
Haemophilus~virus~HP2	Heunggongvirae	Uroviricota	Caudoviricetes	Caudovirales	Myoviridae	Hpunavirus	preVC_125	Clustered	VC_125_0	20	0.9706	1	5.56846	0.9706	1	1	1	1	1	1	12
Halobacterium~phage~phiH	Heunggongvirae	Uroviricota	Caudoviricetes	Caudovirales	Myoviridae	Myohalovirus	preVC_141	Clustered	VC_141_0	3	0.9788	0.9	7.51657	0.8809	1	1	1	1	1	1	1
Halobacterium~virus~ChaoS9	Heunggongvirae	Uroviricota	Caudoviricetes	Caudovirales	Myoviridae	Myohalovirus	preVC_141	Clustered	VC_141_0	3	0.9788	0.9	7.51657	0.8809	1	1	1	1	1	1	1
Halocynthia~phage~JM-2012	Heunggongvirae	Uroviricota	Caudoviricetes	Caudovirales	Myoviridae	Unassigned	preVC_358	Clustered/Singleton	VC_358_2	1	0	0	0	0	1	1	1	1	1	1	0
Haloferax~virus~HF1	Heunggongvirae	Uroviricota	Caudoviricetes	Caudovirales	Myoviridae	Haloferacalesvirus	preVC_471	Clustered	VC_471_0	4	0.7321	0.999638	3.5889	0.7319	1	1	1	1	1	1	1
[truncated: 3,631 more rows]

## Sheet: Supplementary Table 4
Supplementary Table 4. Phage type and host predictions of vaginal phages.
Isolate	Phage type prediction	Phage host prediction	Phage host taxonomy
DZY01_k141_15722	temperate	Actinomyces neuii	Actinomycetota
DZY10_k141_20080	temperate	Actinomyces oris	Actinomycetota
DZY10_k141_21116	temperate	Coriobacteriales bacterium DNF00809	Actinomycetota
DZY20_k141_25886	virulent	Cutibacterium avidum	Actinomycetota
DZY02_k141_6535	temperate	Gardnerella sp. DNF01162	Actinomycetota
DZY08_k141_10755	temperate	Gardnerella sp. DNF01162	Actinomycetota
DZY01_k141_15590	virulent	Gardnerella vaginalis	Actinomycetota
DZY02_k141_8662	virulent	Gardnerella vaginalis	Actinomycetota
DZY02_k141_12537	temperate	Gardnerella vaginalis	Actinomycetota
DZY05_k141_7901	temperate	Gardnerella vaginalis	Actinomycetota
DZY07_k141_18165	temperate	Gardnerella vaginalis	Actinomycetota
DZY10_k141_16913	temperate	Gardnerella vaginalis	Actinomycetota
DZY20_k141_25896	temperate	Gardnerella vaginalis	Actinomycetota
DZY01_k141_15428	temperate	Mobiluncus curtisii	Actinomycetota
DZY01_k141_15715	temperate	Mobiluncus curtisii	Actinomycetota
DZY11_k141_11610	temperate	Schaalia canis	Actinomycetota
DZY10_k141_18394	temperate	Sneathia amnii	Actinomycetota
DZY11_k141_12678	temperate	Anaerococcus lactolyticus	Bacillota
DZY05_k141_10642	temperate	Anaerococcus sp. Marseille-P3915	Bacillota
DZY24_k141_6096	virulent	Bacillus pumilus	Bacillota
DZY20_k141_26004	virulent	Faecalibacterium prausnitzii	Bacillota
DZY05_k141_4867	virulent	Faecalibacterium sp. OM04-11BH	Bacillota
DZY09_k141_8343	temperate	Fusobacterium naviforme	Bacillota
DZY07_k141_19961	temperate	Lactobacillus crispatus	Bacillota
DZY20_k141_11431	temperate	Lactobacillus crispatus	Bacillota
DZY01_k141_15569	temperate	Lactobacillus gasseri	Bacillota
DZY02_k141_10529	temperate	Lactobacillus iners	Bacillota
DZY09_k141_18770	temperate	Lactobacillus iners	Bacillota
DZY11_k141_15229	temperate	Lactobacillus iners	Bacillota
DZY13_k141_9269	temperate	Lactobacillus iners	Bacillota
DZY08_k141_2288	temperate	Lactobacillus jensenii	Bacillota
DZY18_k141_23506	temperate	Lactobacillus salivarius	Bacillota
DZY10_k141_22005	temperate	Lactobacillus sp. 203-3	Bacillota
DZY12_k141_10925	temperate	Mageeibacillus indolicus	Bacillota
DZY19_k141_20372	virulent	Megamonas funiformis	Bacillota
DZY19_k141_3894	virulent	Megasphaera sp. An286	Bacillota
DZY19_k141_10386	virulent	Megasphaera stantonii	Bacillota
DZY23_k141_5839	virulent	Phascolarctobacterium faecium	Bacillota
DZY19_k141_18915	virulent	Sporomusa sphaeroides	Bacillota
DZY07_k141_6906	virulent	Bacteroides ovatus	Bacteroidota
DZY20_k141_25887	virulent	Bacteroides ovatus	Bacteroidota
DZY20_k141_12405	virulent	Bacteroides sp. AF39-16AC	Bacteroidota
DZY20_k141_8577	virulent	Bacteroides uniformis	Bacteroidota
DZY05_k141_10672	virulent	Porphyromonas asaccharolytica	Bacteroidota
DZY10_k141_6677	temperate	Porphyromonas asaccharolytica	Bacteroidota
DZY03_k141_6054	virulent	Porphyromonas crevioricanis	Bacteroidota
DZY13_k141_23045	virulent	Porphyromonas crevioricanis	Bacteroidota
DZY04_k141_2042	virulent	Porphyromonas uenonis	Bacteroidota
DZY10_k141_21376	virulent	Porphyromonas uenonis	Bacteroidota
DZY12_k141_6430	virulent	Porphyromonas uenonis	Bacteroidota
DZY10_k141_22512	virulent	Prevotella amnii	Bacteroidota
DZY15_k141_2869	virulent	Prevotella amnii	Bacteroidota
DZY16_k141_3734	virulent	Prevotella bivia	Bacteroidota
DZY17_k141_6166	virulent	Prevotella bivia	Bacteroidota
DZY23_k141_8073	virulent	Prevotella bivia	Bacteroidota
DZY08_k141_19861	virulent	Prevotella buccalis	Bacteroidota
DZY10_k141_13827	virulent	Prevotella buccalis	Bacteroidota
DZY10_k141_18920	temperate	Prevotella buccalis	Bacteroidota
DZY11_k141_4555	virulent	Prevotella colorans	Bacteroidota
DZY07_k141_12628	virulent	Prevotella copri	Bacteroidota
DZY23_k141_3168	virulent	Prevotella copri	Bacteroidota
DZY02_k141_12826	virulent	Prevotella disiens	Bacteroidota
DZY21_k141_12123	virulent	Prevotella sp. BV3P1	Bacteroidota
DZY02_k141_8935	virulent	Prevotella sp. HMSC077E08	Bacteroidota
DZY09_k141_21200	virulent	Prevotella sp. HUN102	Bacteroidota
DZY09_k141_15285	virulent	Prevotella timonensis	Bacteroidota
DZY19_k141_12626	virulent	Microchaete diplosiphon	Cyanobacteriota
DZY05_k141_3183	virulent	Methanotorris igneus	Methanobacteriota
DZY14_k141_12649	virulent	Bathymodiolus thermophilus thioautotrophic gill symbiont	Pseudomonadota
DZY17_k141_467	virulent	Bathymodiolus thermophilus thioautotrophic gill symbiont	Pseudomonadota
DZY18_k141_21279	temperate	Gallibacterium genomosp. 3	Pseudomonadota
DZY11_k141_10256	virulent	Natronospirillum operossus	Pseudomonadota
DZY02_k141_12532	virulent	Neisseria sp. HMSC31F04	Pseudomonadota
DZY19_k141_10263	virulent	Rahnella sp. JUb53	Pseudomonadota
DZY17_k141_0	virulent	Sutterella wadsworthensis	Pseudomonadota
DZY17_k141_7806	virulent	Sutterella wadsworthensis	Pseudomonadota
DZY13_k141_13824	virulent	Thioalkalivibrio sulfidiphilus	Pseudomonadota
DZY07_k141_14612	virulent	Mesotoga prima	Thermotogota

## Sheet: Supplementary Table 5
Supplementary Table 5. The detailed information of the 185 identified functional genes.
ID	KEGG_ko	level1_pathway_name	level2_pathway_name	level3_pathway_name	ko_name	ko_des
DZY10_k141_18920_10	K13730	Human Diseases	Infectious disease: bacterial	Bacterial invasion of epithelial cells	inlA	internalin A
DZY02_k141_12532_14	K10026	Brite Hierarchies	Protein families: genetic information processing	Transfer RNA biogenesis	queE	7-carboxy-7-deazaguanine synthase
DZY02_k141_12532_14	K10026	Metabolism	Metabolism of cofactors and vitamins	Folate biosynthesis	queE	7-carboxy-7-deazaguanine synthase
DZY01_k141_15428_3	K07741	Not Included in Pathway or Brite	Protein families: genetic information processing	Transcription	antB	anti-repressor protein
DZY01_k141_15569_7	K07741	Not Included in Pathway or Brite	Protein families: genetic information processing	Transcription	antB	anti-repressor protein
DZY01_k141_15569_3	K07741	Not Included in Pathway or Brite	Protein families: genetic information processing	Transcription	antB	anti-repressor protein
DZY05_k141_10642_10	K07741	Not Included in Pathway or Brite	Protein families: genetic information processing	Transcription	antB	anti-repressor protein
DZY07_k141_19961_9	K07741	Not Included in Pathway or Brite	Protein families: genetic information processing	Transcription	antB	anti-repressor protein
DZY09_k141_18770_21	K07741	Not Included in Pathway or Brite	Protein families: genetic information processing	Transcription	antB	anti-repressor protein
DZY09_k141_18770_18	K07741	Not Included in Pathway or Brite	Protein families: genetic information processing	Transcription	antB	anti-repressor protein
DZY10_k141_21116_5	K07741	Not Included in Pathway or Brite	Protein families: genetic information processing	Transcription	antB	anti-repressor protein
DZY13_k141_9269_22	K07741	Not Included in Pathway or Brite	Protein families: genetic information processing	Transcription	antB	anti-repressor protein
DZY10_k141_22005_0	K07505	Not Included in Pathway or Brite	Protein families: genetic information processing	Replication and repair	repA	regulatory protein RepA
DZY12_k141_10925_0	K07505	Not Included in Pathway or Brite	Protein families: genetic information processing	Replication and repair	repA	regulatory protein RepA
DZY10_k141_21116_2	K07504	Not Included in Pathway or Brite	Protein families: genetic information processing	Others	K07504	predicted type IV restriction endonuclease
DZY10_k141_21376_4	K07504	Not Included in Pathway or Brite	Protein families: genetic information processing	Others	K07504	predicted type IV restriction endonuclease
DZY05_k141_10642_48	K07474	Not Included in Pathway or Brite	Protein families: genetic information processing	Replication and repair	xtmA	phage terminase small subunit
DZY10_k141_18394_27	K07474	Not Included in Pathway or Brite	Protein families: genetic information processing	Replication and repair	xtmA	phage terminase small subunit
DZY05_k141_10642_8	K07455	Brite Hierarchies	Protein families: genetic information processing	DNA repair and recombination proteins	recT	recombination protein RecT
DZY09_k141_21200_8	K07455	Brite Hierarchies	Protein families: genetic information processing	DNA repair and recombination proteins	recT	recombination protein RecT
DZY10_k141_20080_5	K07455	Brite Hierarchies	Protein families: genetic information processing	DNA repair and recombination proteins	recT	recombination protein RecT
DZY13_k141_9269_16	K07451	Brite Hierarchies	Protein families: signaling and cellular processes	Prokaryotic defense system	mcrA	5-methylcytosine-specific restriction enzyme A
DZY08_k141_10755_6	K07341	Brite Hierarchies	Protein families: signaling and cellular processes	Prokaryotic defense system	doc	death on curing protein
DZY12_k141_10925_12	K07273	Not Included in Pathway or Brite	Protein families: signaling and cellular processes	Structural proteins	acm	lysozyme
DZY02_k141_8935_12	K07132	Brite Hierarchies	Viral protein families	Viral proteins	MuB	Enterobacteriaceae phage ATP-dependent target DNA activator
DZY02_k141_8935_35	K07052	Brite Hierarchies	Protein families: metabolism	Peptidases and inhibitors	K07052	CAAX protease family protein
DZY02_k141_12532_10	K06920	Brite Hierarchies	Protein families: genetic information processing	Transfer RNA biogenesis	queC	7-cyano-7-deazaguanine synthase
DZY02_k141_12532_10	K06920	Metabolism	Metabolism of cofactors and vitamins	Folate biosynthesis	queC	7-cyano-7-deazaguanine synthase
DZY07_k141_19961_0	K06919	Not Included in Pathway or Brite	Protein families: genetic information processing	Replication and repair	K06919	putative DNA primase/helicase
DZY09_k141_18770_8	K06919	Not Included in Pathway or Brite	Protein families: genetic information processing	Replication and repair	K06919	putative DNA primase/helicase
DZY10_k141_18394_3	K06919	Not Included in Pathway or Brite	Protein families: genetic information processing	Replication and repair	K06919	putative DNA primase/helicase
DZY13_k141_9269_8	K06919	Not Included in Pathway or Brite	Protein families: genetic information processing	Replication and repair	K06919	putative DNA primase/helicase
DZY20_k141_25886_20	K06919	Not Included in Pathway or Brite	Protein families: genetic information processing	Replication and repair	K06919	putative DNA primase/helicase
DZY09_k141_8343_2	K06909	Not Included in Pathway or Brite	Protein families: genetic information processing	Replication and repair	xtmB	phage terminase large subunit
DZY10_k141_18920_3	K06909	Not Included in Pathway or Brite	Protein families: genetic information processing	Replication and repair	xtmB	phage terminase large subunit
DZY10_k141_21376_2	K06909	Not Included in Pathway or Brite	Protein families: genetic information processing	Replication and repair	xtmB	phage terminase large subunit
DZY01_k141_15715_1	K06904	Brite Hierarchies	Protein families: metabolism	Peptidases and inhibitors	GP4	Escherichia/Staphylococcus phage prohead protease
DZY01_k141_15428_1	K04763	Brite Hierarchies	Protein families: genetic information processing	Chromosome and associated proteins	xerD	integrase/recombinase XerD
DZY02_k141_8935_14	K04485	Brite Hierarchies	Protein families: genetic information processing	DNA repair and recombination proteins	radA, sms	DNA repair protein RadA/Sms
DZY11_k141_12678_5	K03700	Brite Hierarchies	Protein families: genetic information processing	DNA repair and recombination proteins	recU	recombination protein U
DZY10_k141_18920_40	K03555	Brite Hierarchies	Protein families: genetic information processing	DNA repair and recombination proteins	mutS	DNA mismatch repair protein MutS
DZY10_k141_18920_40	K03555	Genetic Information Processing	Replication and repair	Mismatch repair	mutS	DNA mismatch repair protein MutS
DZY10_k141_18394_7	K03497	Brite Hierarchies	Protein families: genetic information processing	Transcription factors	parB, spo0J	ParB family transcriptional regulator, chromosome partitioning protein
DZY10_k141_18394_7	K03497	Brite Hierarchies	Protein families: genetic information processing	Chromosome and associated proteins	parB, spo0J	ParB family transcriptional regulator, chromosome partitioning protein
DZY10_k141_18394_7	K03497	Brite Hierarchies	Protein families: signaling and cellular processes	Cytoskeleton proteins	parB, spo0J	ParB family transcriptional regulator, chromosome partitioning protein
DZY10_k141_21116_14	K03497	Brite Hierarchies	Protein families: genetic information processing	Transcription factors	parB, spo0J	ParB family transcriptional regulator, chromosome partitioning protein
DZY10_k141_21116_14	K03497	Brite Hierarchies	Protein families: genetic information processing	Chromosome and associated proteins	parB, spo0J	ParB family transcriptional regulator, chromosome partitioning protein
DZY10_k141_21116_14	K03497	Brite Hierarchies	Protein families: signaling and cellular processes	Cytoskeleton proteins	parB, spo0J	ParB family transcriptional regulator, chromosome partitioning protein
DZY09_k141_21200_46	K03466	Brite Hierarchies	Protein families: genetic information processing	Chromosome and associated proteins	ftsK, spoIIIE	DNA segregation ATPase FtsK/SpoIIIE, S-DNA-T family
DZY01_k141_15428_14	K03111	Brite Hierarchies	Protein families: genetic information processing	DNA replication proteins	ssb	single-strand DNA-binding protein
DZY01_k141_15428_14	K03111	Brite Hierarchies	Protein families: genetic information processing	DNA repair and recombination proteins	ssb	single-strand DNA-binding protein
DZY01_k141_15428_14	K03111	Brite Hierarchies	Protein families: genetic information processing	Mitochondrial biogenesis	ssb	single-strand DNA-binding protein
DZY01_k141_15428_14	K03111	Genetic Information Processing	Replication and repair	DNA replication	ssb	single-strand DNA-binding protein
DZY01_k141_15428_14	K03111	Genetic Information Processing	Replication and repair	Mismatch repair	ssb	single-strand DNA-binding protein
DZY01_k141_15428_14	K03111	Genetic Information Processing	Replication and repair	Homologous recombination	ssb	single-strand DNA-binding protein
DZY01_k141_15569_11	K03111	Brite Hierarchies	Protein families: genetic information processing	DNA replication proteins	ssb	single-strand DNA-binding protein
DZY01_k141_15569_11	K03111	Brite Hierarchies	Protein families: genetic information processing	DNA repair and recombination proteins	ssb	single-strand DNA-binding protein
DZY01_k141_15569_11	K03111	Brite Hierarchies	Protein families: genetic information processing	Mitochondrial biogenesis	ssb	single-strand DNA-binding protein
DZY01_k141_15569_11	K03111	Genetic Information Processing	Replication and repair	DNA replication	ssb	single-strand DNA-binding protein
DZY01_k141_15569_11	K03111	Genetic Information Processing	Replication and repair	Mismatch repair	ssb	single-strand DNA-binding protein
DZY01_k141_15569_11	K03111	Genetic Information Processing	Replication and repair	Homologous recombination	ssb	single-strand DNA-binding protein
DZY05_k141_10642_12	K03111	Brite Hierarchies	Protein families: genetic information processing	DNA replication proteins	ssb	single-strand DNA-binding protein
DZY05_k141_10642_12	K03111	Brite Hierarchies	Protein families: genetic information processing	DNA repair and recombination proteins	ssb	single-strand DNA-binding protein
DZY05_k141_10642_12	K03111	Brite Hierarchies	Protein families: genetic information processing	Mitochondrial biogenesis	ssb	single-strand DNA-binding protein
DZY05_k141_10642_12	K03111	Genetic Information Processing	Replication and repair	DNA replication	ssb	single-strand DNA-binding protein
DZY05_k141_10642_12	K03111	Genetic Information Processing	Replication and repair	Mismatch repair	ssb	single-strand DNA-binding protein
DZY05_k141_10642_12	K03111	Genetic Information Processing	Replication and repair	Homologous recombination	ssb	single-strand DNA-binding protein
DZY07_k141_18165_12	K03111	Brite Hierarchies	Protein families: genetic information processing	DNA replication proteins	ssb	single-strand DNA-binding protein
DZY07_k141_18165_12	K03111	Brite Hierarchies	Protein families: genetic information processing	DNA repair and recombination proteins	ssb	single-strand DNA-binding protein
DZY07_k141_18165_12	K03111	Brite Hierarchies	Protein families: genetic information processing	Mitochondrial biogenesis	ssb	single-strand DNA-binding protein
DZY07_k141_18165_12	K03111	Genetic Information Processing	Replication and repair	DNA replication	ssb	single-strand DNA-binding protein
DZY07_k141_18165_12	K03111	Genetic Information Processing	Replication and repair	Mismatch repair	ssb	single-strand DNA-binding protein
DZY07_k141_18165_12	K03111	Genetic Information Processing	Replication and repair	Homologous recombination	ssb	single-strand DNA-binding protein
DZY08_k141_10755_16	K03111	Brite Hierarchies	Protein families: genetic information processing	DNA replication proteins	ssb	single-strand DNA-binding protein
DZY08_k141_10755_16	K03111	Brite Hierarchies	Protein families: genetic information processing	DNA repair and recombination proteins	ssb	single-strand DNA-binding protein
DZY08_k141_10755_16	K03111	Brite Hierarchies	Protein families: genetic information processing	Mitochondrial biogenesis	ssb	single-strand DNA-binding protein
DZY08_k141_10755_16	K03111	Genetic Information Processing	Replication and repair	DNA replication	ssb	single-strand DNA-binding protein
DZY08_k141_10755_16	K03111	Genetic Information Processing	Replication and repair	Mismatch repair	ssb	single-strand DNA-binding protein
DZY08_k141_10755_16	K03111	Genetic Information Processing	Replication and repair	Homologous recombination	ssb	single-strand DNA-binding protein
DZY08_k141_2288_16	K03111	Brite Hierarchies	Protein families: genetic information processing	DNA replication proteins	ssb	single-strand DNA-binding protein
DZY08_k141_2288_16	K03111	Brite Hierarchies	Protein families: genetic information processing	DNA repair and recombination proteins	ssb	single-strand DNA-binding protein
DZY08_k141_2288_16	K03111	Brite Hierarchies	Protein families: genetic information processing	Mitochondrial biogenesis	ssb	single-strand DNA-binding protein
DZY08_k141_2288_16	K03111	Genetic Information Processing	Replication and repair	DNA replication	ssb	single-strand DNA-binding protein
DZY08_k141_2288_16	K03111	Genetic Information Processing	Replication and repair	Mismatch repair	ssb	single-strand DNA-binding protein
DZY08_k141_2288_16	K03111	Genetic Information Processing	Replication and repair	Homologous recombination	ssb	single-strand DNA-binding protein
DZY09_k141_21200_22	K03111	Brite Hierarchies	Protein families: genetic information processing	DNA replication proteins	ssb	single-strand DNA-binding protein
DZY09_k141_21200_22	K03111	Brite Hierarchies	Protein families: genetic information processing	DNA repair and recombination proteins	ssb	single-strand DNA-binding protein
DZY09_k141_21200_22	K03111	Brite Hierarchies	Protein families: genetic information processing	Mitochondrial biogenesis	ssb	single-strand DNA-binding protein
DZY09_k141_21200_22	K03111	Genetic Information Processing	Replication and repair	DNA replication	ssb	single-strand DNA-binding protein
DZY09_k141_21200_22	K03111	Genetic Information Processing	Replication and repair	Mismatch repair	ssb	single-strand DNA-binding protein
DZY09_k141_21200_22	K03111	Genetic Information Processing	Replication and repair	Homologous recombination	ssb	single-strand DNA-binding protein
DZY10_k141_18920_19	K03111	Brite Hierarchies	Protein families: genetic information processing	DNA replication proteins	ssb	single-strand DNA-binding protein
DZY10_k141_18920_19	K03111	Brite Hierarchies	Protein families: genetic information processing	DNA repair and recombination proteins	ssb	single-strand DNA-binding protein
DZY10_k141_18920_19	K03111	Brite Hierarchies	Protein families: genetic information processing	Mitochondrial biogenesis	ssb	single-strand DNA-binding protein
DZY10_k141_18920_19	K03111	Genetic Information Processing	Replication and repair	DNA replication	ssb	single-strand DNA-binding protein
DZY10_k141_18920_19	K03111	Genetic Information Processing	Replication and repair	Mismatch repair	ssb	single-strand DNA-binding protein
DZY10_k141_18920_19	K03111	Genetic Information Processing	Replication and repair	Homologous recombination	ssb	single-strand DNA-binding protein
DZY10_k141_20080_13	K03111	Brite Hierarchies	Protein families: genetic information processing	DNA replication proteins	ssb	single-strand DNA-binding protein
DZY10_k141_20080_13	K03111	Brite Hierarchies	Protein families: genetic information processing	DNA repair and recombination proteins	ssb	single-strand DNA-binding protein
DZY10_k141_20080_13	K03111	Brite Hierarchies	Protein families: genetic information processing	Mitochondrial biogenesis	ssb	single-strand DNA-binding protein
DZY10_k141_20080_13	K03111	Genetic Information Processing	Replication and repair	DNA replication	ssb	single-strand DNA-binding protein
DZY10_k141_20080_13	K03111	Genetic Information Processing	Replication and repair	Mismatch repair	ssb	single-strand DNA-binding protein
DZY10_k141_20080_13	K03111	Genetic Information Processing	Replication and repair	Homologous recombination	ssb	single-strand DNA-binding protein
DZY10_k141_21116_16	K03111	Brite Hierarchies	Protein families: genetic information processing	DNA replication proteins	ssb	single-strand DNA-binding protein
DZY10_k141_21116_16	K03111	Brite Hierarchies	Protein families: genetic information processing	DNA repair and recombination proteins	ssb	single-strand DNA-binding protein
DZY10_k141_21116_16	K03111	Brite Hierarchies	Protein families: genetic information processing	Mitochondrial biogenesis	ssb	single-strand DNA-binding protein
DZY10_k141_21116_16	K03111	Genetic Information Processing	Replication and repair	DNA replication	ssb	single-strand DNA-binding protein
DZY10_k141_21116_16	K03111	Genetic Information Processing	Replication and repair	Mismatch repair	ssb	single-strand DNA-binding protein
DZY10_k141_21116_16	K03111	Genetic Information Processing	Replication and repair	Homologous recombination	ssb	single-strand DNA-binding protein
DZY20_k141_25896_12	K03111	Brite Hierarchies	Protein families: genetic information processing	DNA replication proteins	ssb	single-strand DNA-binding protein
DZY20_k141_25896_12	K03111	Brite Hierarchies	Protein families: genetic information processing	DNA repair and recombination proteins	ssb	single-strand DNA-binding protein
DZY20_k141_25896_12	K03111	Brite Hierarchies	Protein families: genetic information processing	Mitochondrial biogenesis	ssb	single-strand DNA-binding protein
DZY20_k141_25896_12	K03111	Genetic Information Processing	Replication and repair	DNA replication	ssb	single-strand DNA-binding protein
DZY20_k141_25896_12	K03111	Genetic Information Processing	Replication and repair	Mismatch repair	ssb	single-strand DNA-binding protein
DZY20_k141_25896_12	K03111	Genetic Information Processing	Replication and repair	Homologous recombination	ssb	single-strand DNA-binding protein
DZY09_k141_21200_16	K02342	Brite Hierarchies	Protein families: genetic information processing	DNA replication proteins	dnaQ	DNA polymerase III subunit epsilon
DZY09_k141_21200_16	K02342	Brite Hierarchies	Protein families: genetic information processing	DNA repair and recombination proteins	dnaQ	DNA polymerase III subunit epsilon
DZY09_k141_21200_16	K02342	Genetic Information Processing	Replication and repair	DNA replication	dnaQ	DNA polymerase III subunit epsilon
DZY09_k141_21200_16	K02342	Genetic Information Processing	Replication and repair	Mismatch repair	dnaQ	DNA polymerase III subunit epsilon
DZY09_k141_21200_16	K02342	Genetic Information Processing	Replication and repair	Homologous recombination	dnaQ	DNA polymerase III subunit epsilon
DZY24_k141_6096_8	K02338	Brite Hierarchies	Protein families: genetic information processing	DNA replication proteins	dnaN	DNA polymerase III subunit beta
DZY24_k141_6096_8	K02338	Brite Hierarchies	Protein families: genetic information processing	DNA repair and recombination proteins	dnaN	DNA polymerase III subunit beta
DZY24_k141_6096_8	K02338	Genetic Information Processing	Replication and repair	DNA replication	dnaN	DNA polymerase III subunit beta
DZY24_k141_6096_8	K02338	Genetic Information Processing	Replication and repair	Mismatch repair	dnaN	DNA polymerase III subunit beta
DZY24_k141_6096_8	K02338	Genetic Information Processing	Replication and repair	Homologous recombination	dnaN	DNA polymerase III subunit beta
DZY10_k141_18394_1	K02336	Brite Hierarchies	Protein families: genetic information processing	DNA repair and recombination proteins	polB	DNA polymerase II
DZY09_k141_8343_1	K02334	Not Included in Pathway or Brite	Protein families: metabolism	Enzymes with EC numbers	dpo	DNA polymerase bacteriophage-type
DZY01_k141_15569_9	K02315	Brite Hierarchies	Protein families: genetic information processing	DNA replication proteins	dnaC	DNA replication protein DnaC
DZY02_k141_12532_12	K02315	Brite Hierarchies	Protein families: genetic information processing	DNA replication proteins	dnaC	DNA replication protein DnaC
DZY08_k141_2288_11	K01795	Metabolism	Carbohydrate metabolism	Fructose and mannose metabolism	algG	mannuronan 5-epimerase
DZY02_k141_12532_20	K01737	Brite Hierarchies	Protein families: genetic information processing	Transfer RNA biogenesis	queD, ptpS, PTS	6-pyruvoyltetrahydropterin/6-carboxytetrahydropterin synthase
DZY02_k141_12532_20	K01737	Metabolism	Metabolism of cofactors and vitamins	Folate biosynthesis	queD, ptpS, PTS	6-pyruvoyltetrahydropterin/6-carboxytetrahydropterin synthase
DZY10_k141_18394_15	K01520	Brite Hierarchies	Protein families: genetic information processing	DNA repair and recombination proteins	dut, DUT	dUTP diphosphatase
DZY10_k141_18394_15	K01520	Metabolism	Nucleotide metabolism	Pyrimidine metabolism	dut, DUT	dUTP diphosphatase
DZY10_k141_18394_15	K01520	Metabolism	Xenobiotics biodegradation and metabolism	Drug metabolism - other enzymes	dut, DUT	dUTP diphosphatase
DZY24_k141_6096_4	K01494	Metabolism	Nucleotide metabolism	Pyrimidine metabolism	dcd	dCTP deaminase
DZY09_k141_21200_29	K01448	Brite Hierarchies	Protein families: metabolism	Peptidoglycan biosynthesis and degradation proteins	amiABC	N-acetylmuramoyl-L-alanine amidase
DZY09_k141_21200_29	K01448	Brite Hierarchies	Protein families: genetic information processing	Chromosome and associated proteins	amiABC	N-acetylmuramoyl-L-alanine amidase
DZY09_k141_21200_29	K01448	Human Diseases	Drug resistance: antimicrobial	Cationic antimicrobial peptide (CAMP) resistance	amiABC	N-acetylmuramoyl-L-alanine amidase
DZY07_k141_19961_14	K01358	Brite Hierarchies	Protein families: metabolism	Peptidases and inhibitors	clpP, CLPP	ATP-dependent Clp protease, protease subunit
DZY07_k141_19961_14	K01358	Organismal Systems	Aging	Longevity regulating pathway - worm	clpP, CLPP	ATP-dependent Clp protease, protease subunit
DZY07_k141_19961_14	K01358	Cellular Processes	Cell growth and death	Cell cycle - Caulobacter	clpP, CLPP	ATP-dependent Clp protease, protease subunit
DZY10_k141_18920_8	K01358	Brite Hierarchies	Protein families: metabolism	Peptidases and inhibitors	clpP, CLPP	ATP-dependent Clp protease, protease subunit
DZY10_k141_18920_8	K01358	Organismal Systems	Aging	Longevity regulating pathway - worm	clpP, CLPP	ATP-dependent Clp protease, protease subunit
DZY10_k141_18920_8	K01358	Cellular Processes	Cell growth and death	Cell cycle - Caulobacter	clpP, CLPP	ATP-dependent Clp protease, protease subunit
DZY20_k141_11431_13	K01358	Brite Hierarchies	Protein families: metabolism	Peptidases and inhibitors	clpP, CLPP	ATP-dependent Clp protease, protease subunit
DZY20_k141_11431_13	K01358	Organismal Systems	Aging	Longevity regulating pathway - worm	clpP, CLPP	ATP-dependent Clp protease, protease subunit
DZY20_k141_11431_13	K01358	Cellular Processes	Cell growth and death	Cell cycle - Caulobacter	clpP, CLPP	ATP-dependent Clp protease, protease subunit
DZY09_k141_8343_34	K01356	Brite Hierarchies	Protein families: metabolism	Peptidases and inhibitors	lexA	repressor LexA
DZY09_k141_8343_34	K01356	Brite Hierarchies	Protein families: genetic information processing	DNA repair and recombination proteins	lexA	repressor LexA
DZY10_k141_18394_26	K01356	Brite Hierarchies	Protein families: metabolism	Peptidases and inhibitors	lexA	repressor LexA
DZY10_k141_18394_26	K01356	Brite Hierarchies	Protein families: genetic information processing	DNA repair and recombination proteins	lexA	repressor LexA
DZY10_k141_20080_9	K01356	Brite Hierarchies	Protein families: metabolism	Peptidases and inhibitors	lexA	repressor LexA
DZY10_k141_20080_9	K01356	Brite Hierarchies	Protein families: genetic information processing	DNA repair and recombination proteins	lexA	repressor LexA
DZY10_k141_21116_9	K01356	Brite Hierarchies	Protein families: metabolism	Peptidases and inhibitors	lexA	repressor LexA
DZY10_k141_21116_9	K01356	Brite Hierarchies	Protein families: genetic information processing	DNA repair and recombination proteins	lexA	repressor LexA
DZY10_k141_18920_20	K01185	Not Included in Pathway or Brite	Protein families: metabolism	Enzymes with EC numbers	E3.2.1.17	lysozyme
DZY11_k141_11610_13	K01183	Metabolism	Carbohydrate metabolism	Amino sugar and nucleotide sugar metabolism	E3.2.1.14	chitinase
DZY10_k141_20080_18	K01160	Brite Hierarchies	Protein families: genetic information processing	DNA repair and recombination proteins	rusA	crossover junction endodeoxyribonuclease RusA
DZY24_k141_6096_19	K01139	Brite Hierarchies	Protein families: genetic information processing	Ribosome biogenesis	spoT	GTP diphosphokinase / guanosine-3',5'-bis(diphosphate) 3'-diphosphatase
DZY24_k141_6096_19	K01139	Metabolism	Nucleotide metabolism	Purine metabolism	spoT	GTP diphosphokinase / guanosine-3',5'-bis(diphosphate) 3'-diphosphatase
DZY02_k141_12532_15	K01101	Metabolism	Xenobiotics biodegradation and metabolism	Aminobenzoate degradation	E3.1.3.41	4-nitrophenyl phosphatase
DZY09_k141_21200_20	K01101	Metabolism	Xenobiotics biodegradation and metabolism	Aminobenzoate degradation	E3.1.3.41	4-nitrophenyl phosphatase
DZY10_k141_21376_17	K01101	Metabolism	Xenobiotics biodegradation and metabolism	Aminobenzoate degradation	E3.1.3.41	4-nitrophenyl phosphatase
DZY24_k141_6096_13	K00943	Metabolism	Nucleotide metabolism	Pyrimidine metabolism	tmk, DTYMK	dTMP kinase
DZY01_k141_15428_4	K00571	Brite Hierarchies	Protein families: signaling and cellular processes	Prokaryotic defense system	E2.1.1.72	site-specific DNA-methyltransferase (adenine-specific)
DZY09_k141_8343_14	K00571	Brite Hierarchies	Protein families: signaling and cellular processes	Prokaryotic defense system	E2.1.1.72	site-specific DNA-methyltransferase (adenine-specific)
DZY02_k141_8935_13	K00560	Human Diseases	Drug resistance: antineoplastic	Antifolate resistance	thyA, TYMS	thymidylate synthase
DZY02_k141_8935_13	K00560	Metabolism	Nucleotide metabolism	Pyrimidine metabolism	thyA, TYMS	thymidylate synthase
DZY02_k141_8935_13	K00560	Metabolism	Metabolism of cofactors and vitamins	One carbon pool by folate	thyA, TYMS	thymidylate synthase
DZY11_k141_11610_7	K00558	Brite Hierarchies	Protein families: genetic information processing	Transcription factors	DNMT1, dcm	DNA (cytosine-5)-methyltransferase 1
DZY11_k141_11610_7	K00558	Brite Hierarchies	Protein families: genetic information processing	DNA replication proteins	DNMT1, dcm	DNA (cytosine-5)-methyltransferase 1
DZY11_k141_11610_7	K00558	Brite Hierarchies	Protein families: genetic information processing	Chromosome and associated proteins	DNMT1, dcm	DNA (cytosine-5)-methyltransferase 1
DZY11_k141_11610_7	K00558	Brite Hierarchies	Protein families: signaling and cellular processes	Prokaryotic defense system	DNMT1, dcm	DNA (cytosine-5)-methyltransferase 1
DZY11_k141_11610_7	K00558	Human Diseases	Cancer: overview	MicroRNAs in cancer	DNMT1, dcm	DNA (cytosine-5)-methyltransferase 1
DZY11_k141_11610_7	K00558	Metabolism	Amino acid metabolism	Cysteine and methionine metabolism	DNMT1, dcm	DNA (cytosine-5)-methyltransferase 1
DZY24_k141_6096_6	K00558	Brite Hierarchies	Protein families: genetic information processing	Transcription factors	DNMT1, dcm	DNA (cytosine-5)-methyltransferase 1
DZY24_k141_6096_6	K00558	Brite Hierarchies	Protein families: genetic information processing	DNA replication proteins	DNMT1, dcm	DNA (cytosine-5)-methyltransferase 1
DZY24_k141_6096_6	K00558	Brite Hierarchies	Protein families: genetic information processing	Chromosome and associated proteins	DNMT1, dcm	DNA (cytosine-5)-methyltransferase 1
DZY24_k141_6096_6	K00558	Brite Hierarchies	Protein families: signaling and cellular processes	Prokaryotic defense system	DNMT1, dcm	DNA (cytosine-5)-methyltransferase 1
DZY24_k141_6096_6	K00558	Human Diseases	Cancer: overview	MicroRNAs in cancer	DNMT1, dcm	DNA (cytosine-5)-methyltransferase 1
DZY24_k141_6096_6	K00558	Metabolism	Amino acid metabolism	Cysteine and methionine metabolism	DNMT1, dcm	DNA (cytosine-5)-methyltransferase 1
DZY24_k141_6096_0	K00525	Brite Hierarchies	Protein families: genetic information processing	DNA repair and recombination proteins	E1.17.4.1A, nrdA, nrdE	ribonucleoside-diphosphate reductase alpha chain
DZY24_k141_6096_0	K00525	Metabolism	Nucleotide metabolism	Purine metabolism	E1.17.4.1A, nrdA, nrdE	ribonucleoside-diphosphate reductase alpha chain
DZY24_k141_6096_0	K00525	Metabolism	Nucleotide metabolism	Pyrimidine metabolism	E1.17.4.1A, nrdA, nrdE	ribonucleoside-diphosphate reductase alpha chain
